# Supplementary material for: A Mendelian analysis of the relationships between immune cells and breast cancer
Source: PubMed Central journal article supplement (PMC10847340; doi:10.3389/fonc.2024.1341292), 2024-01-24

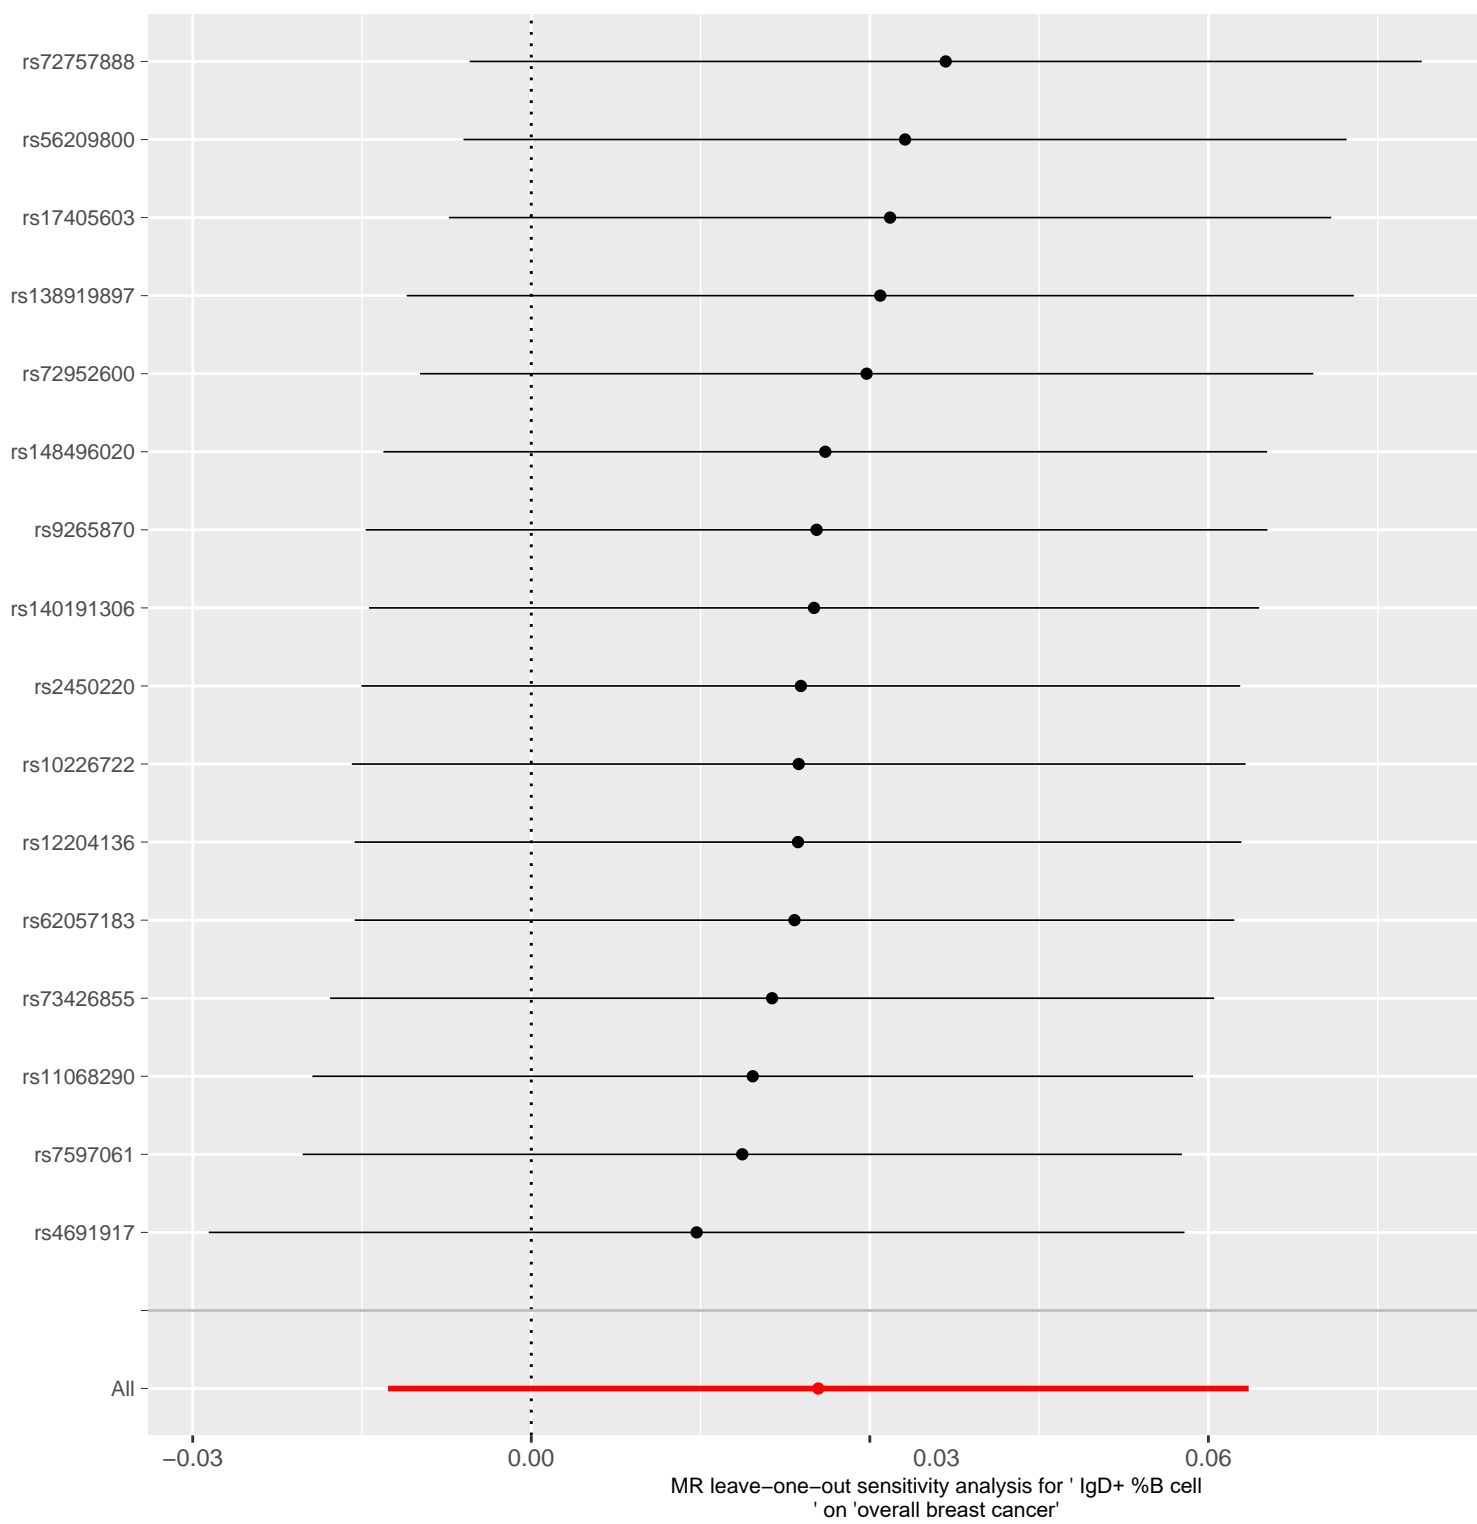

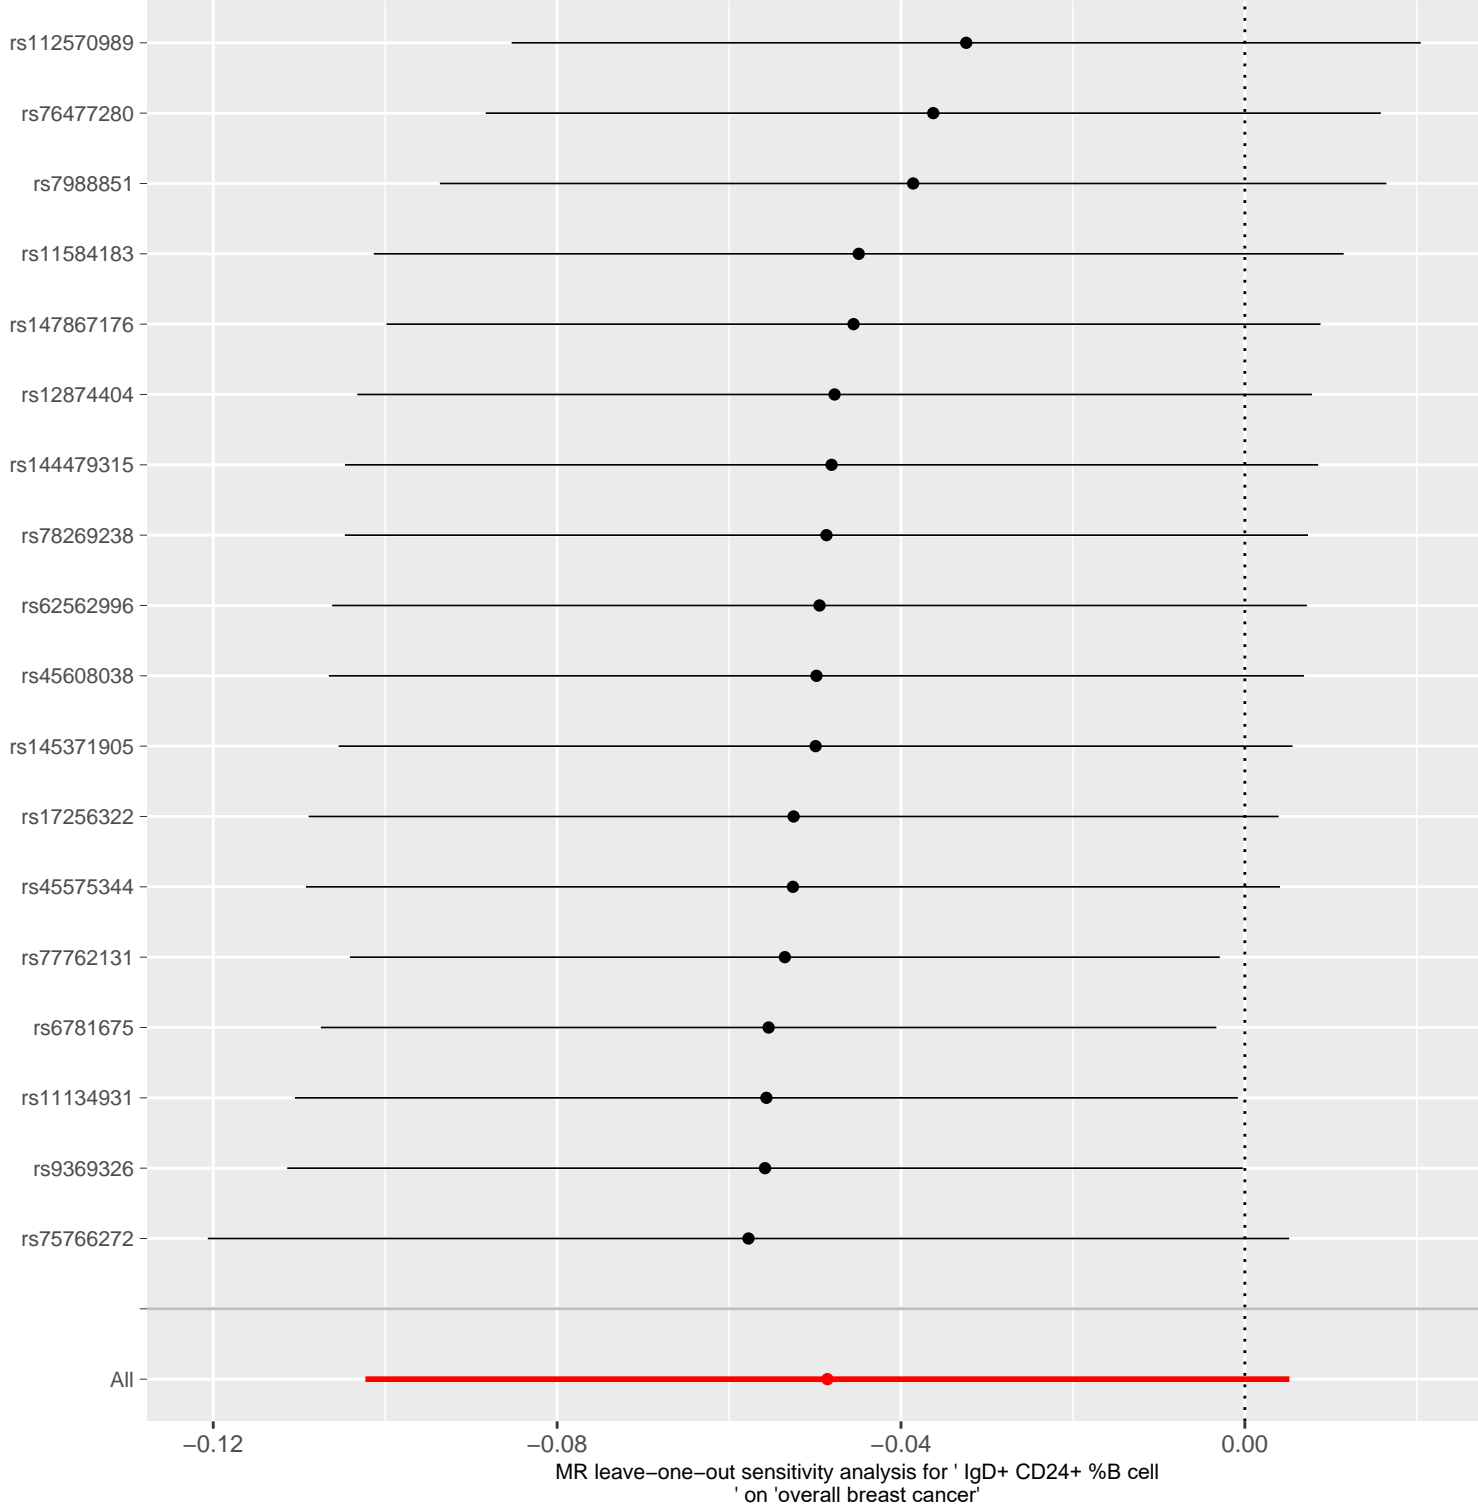

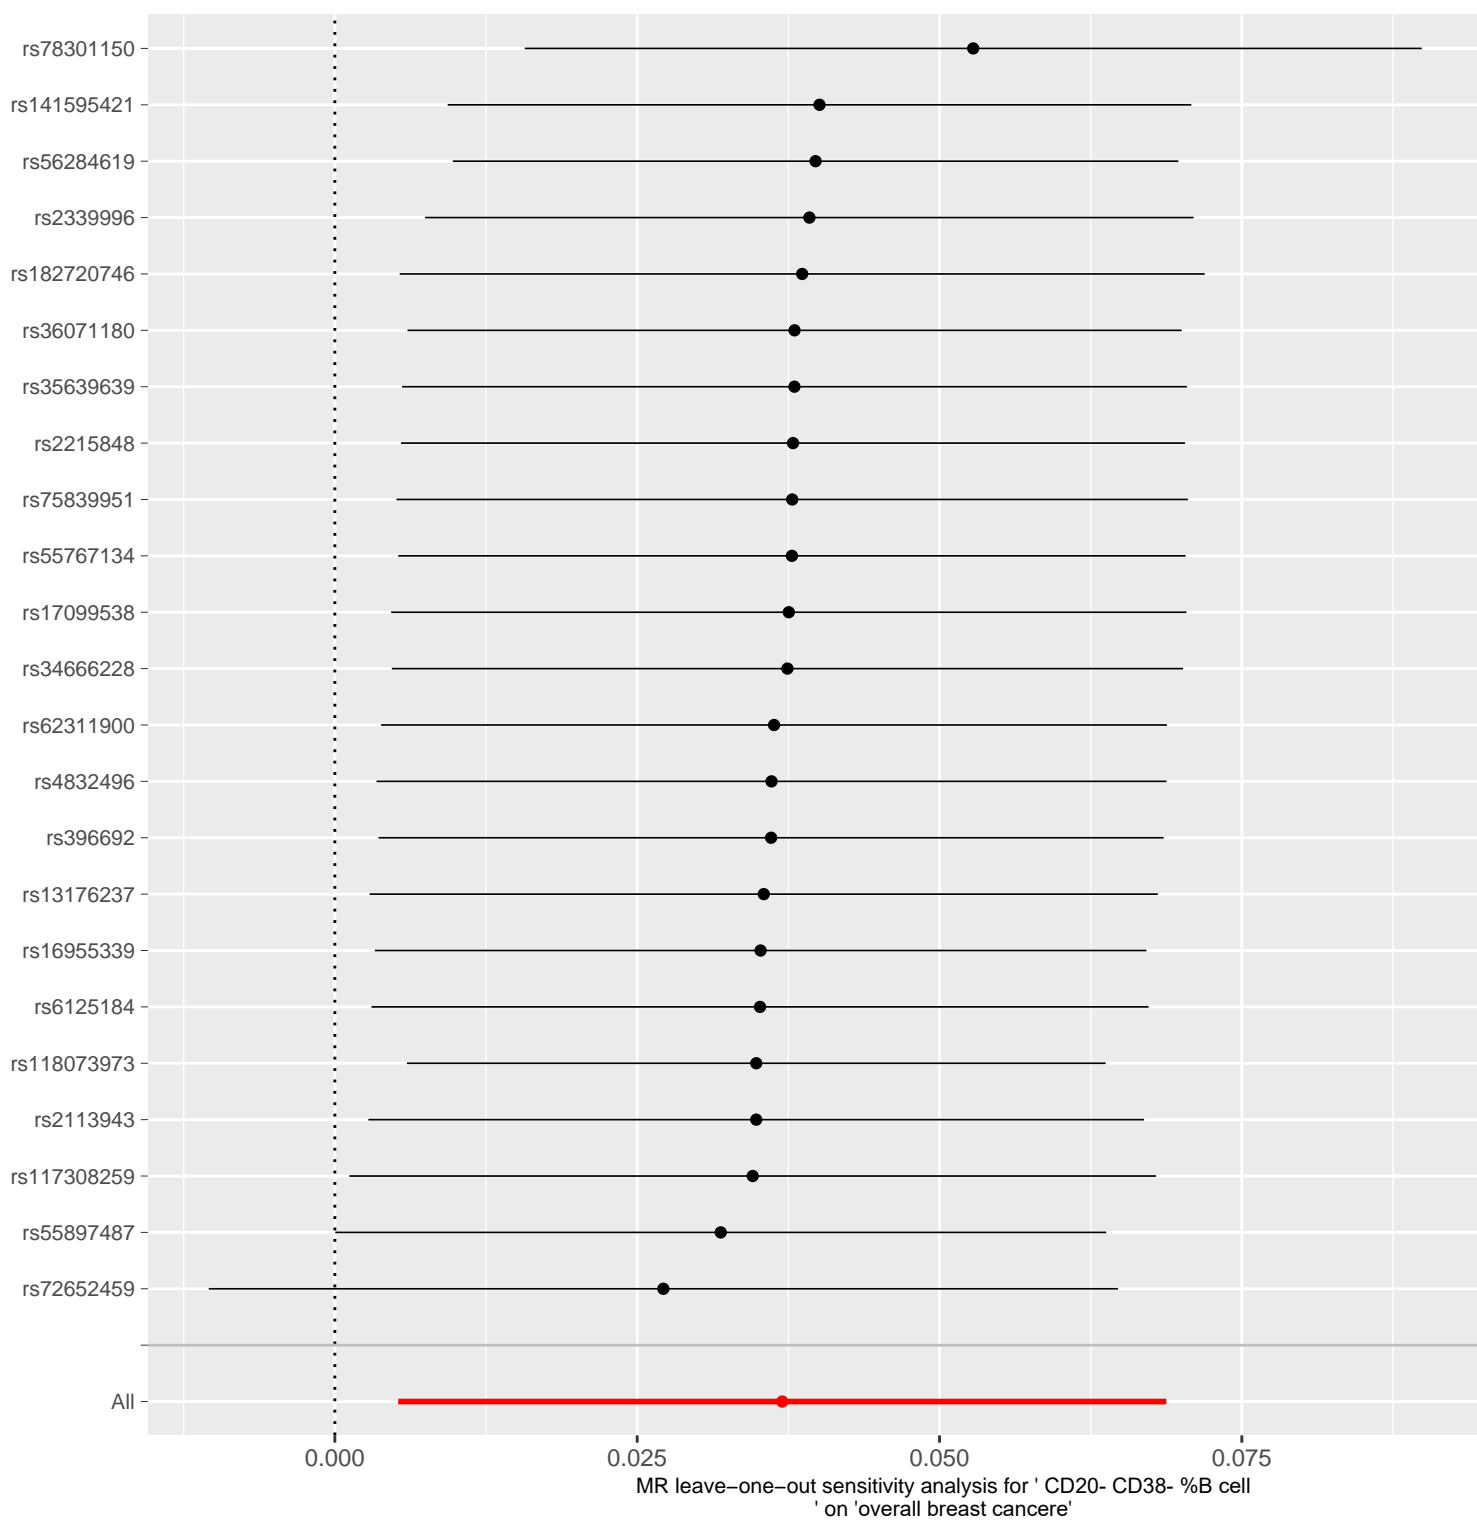

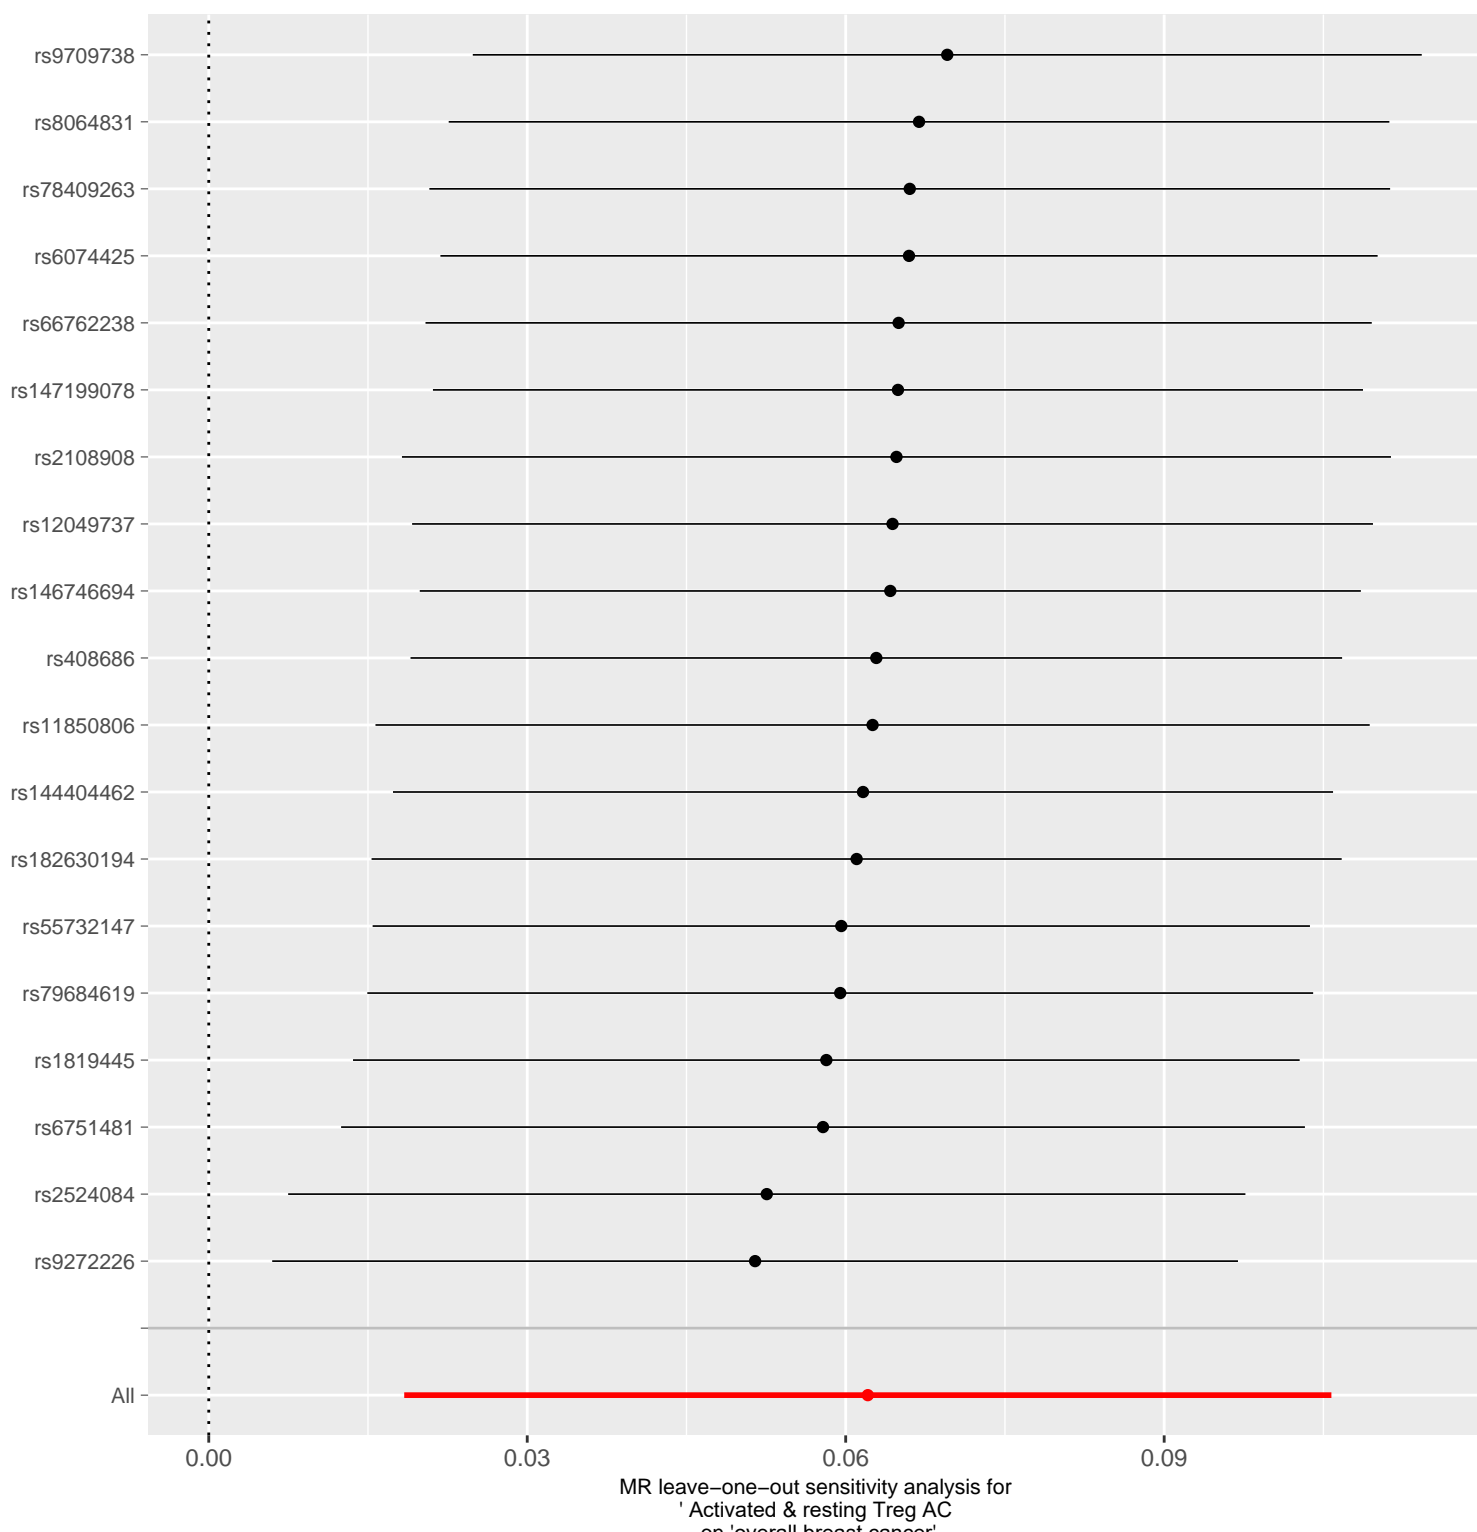

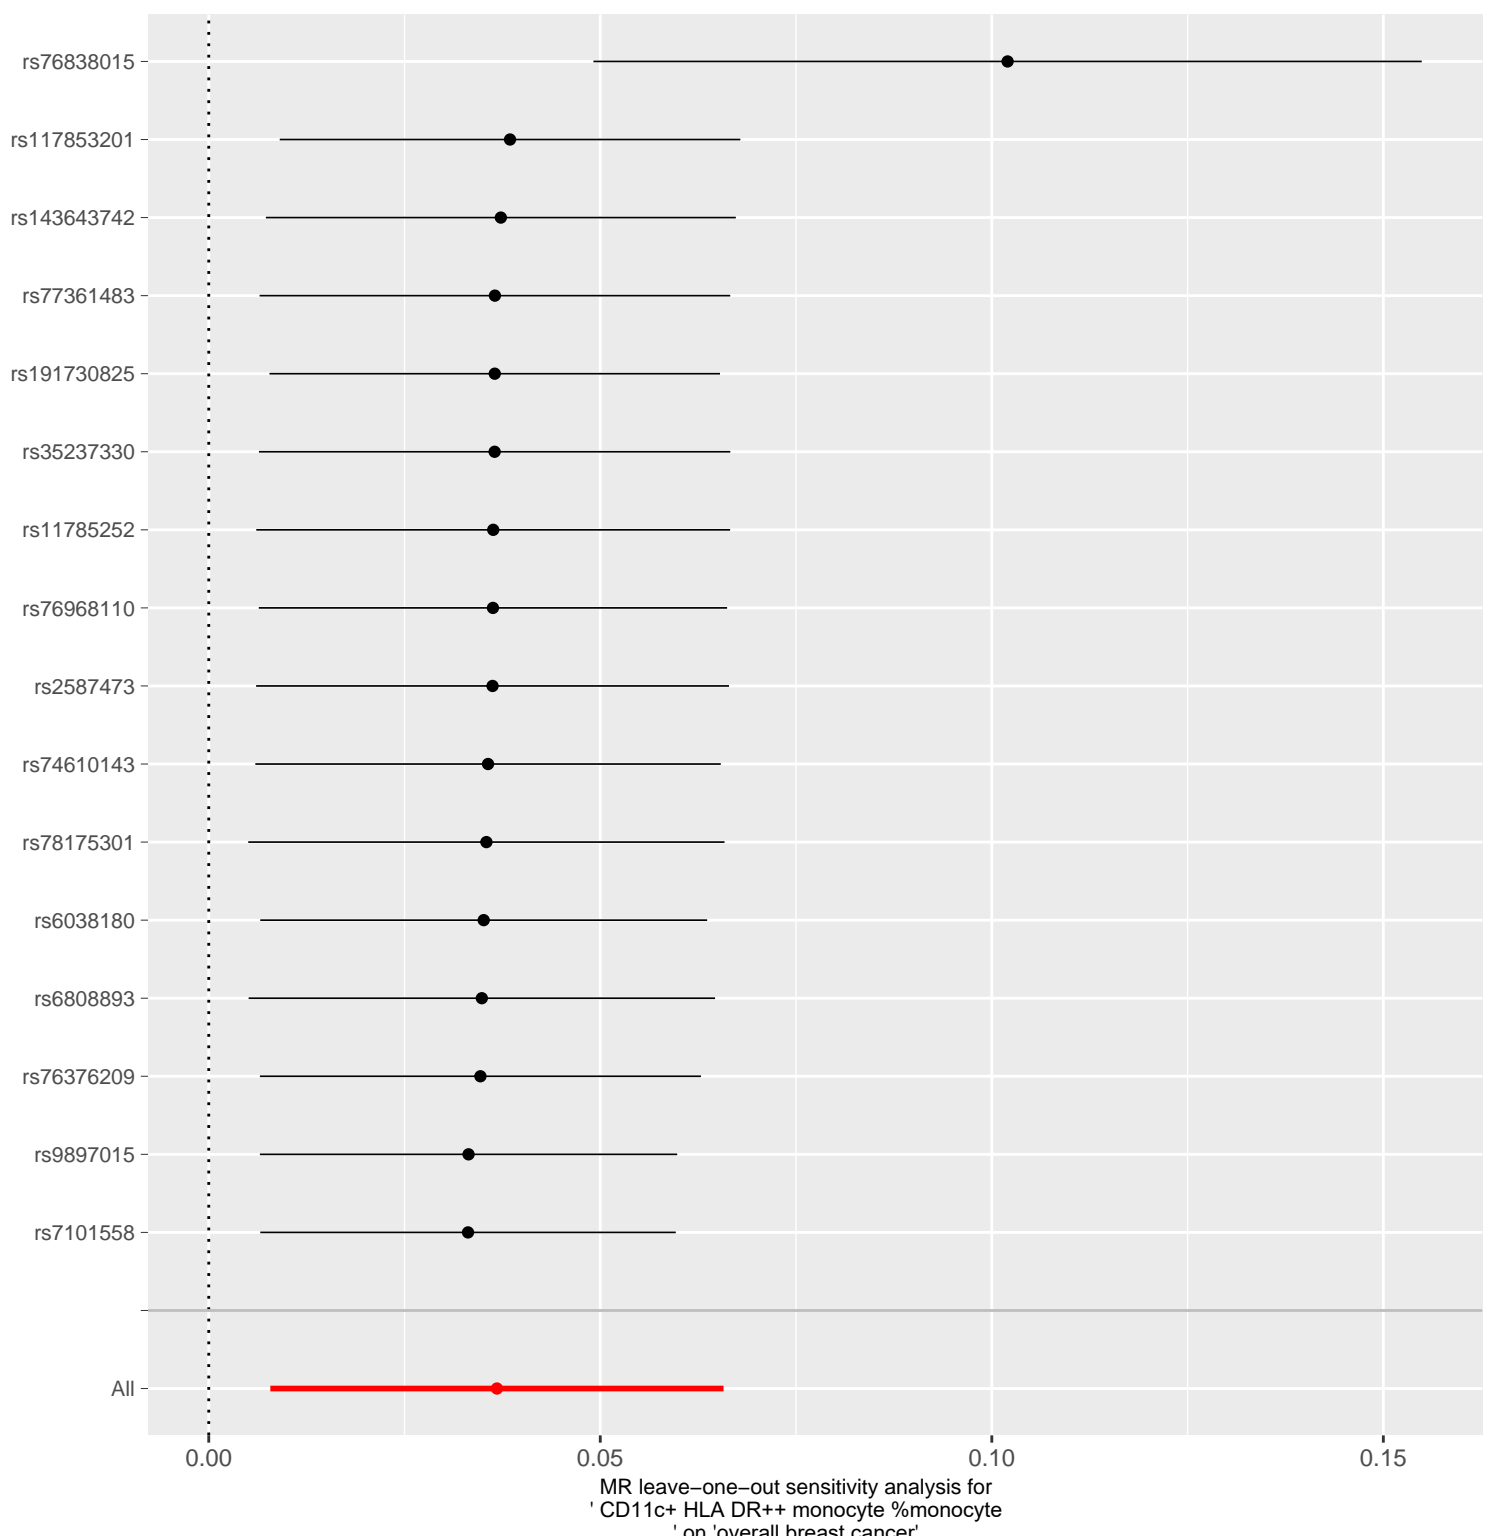

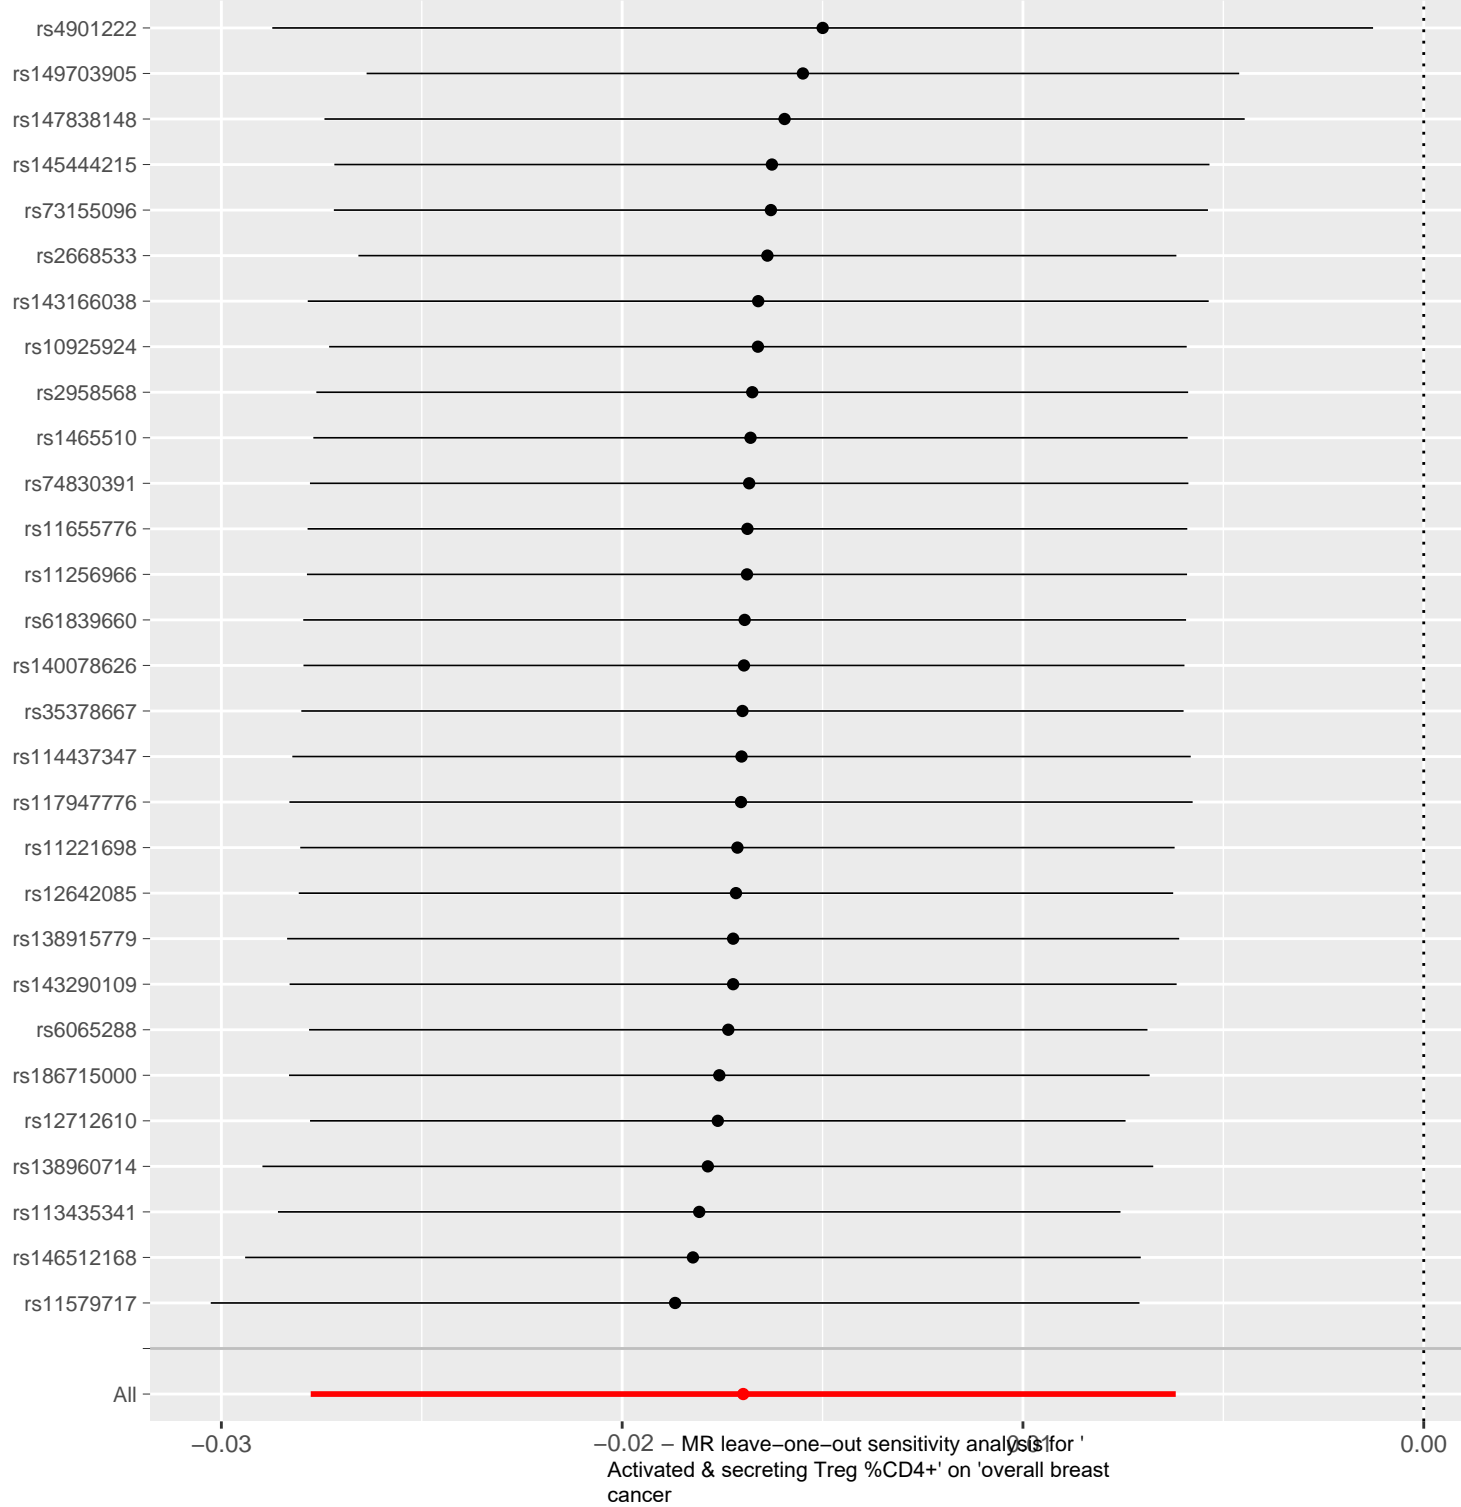

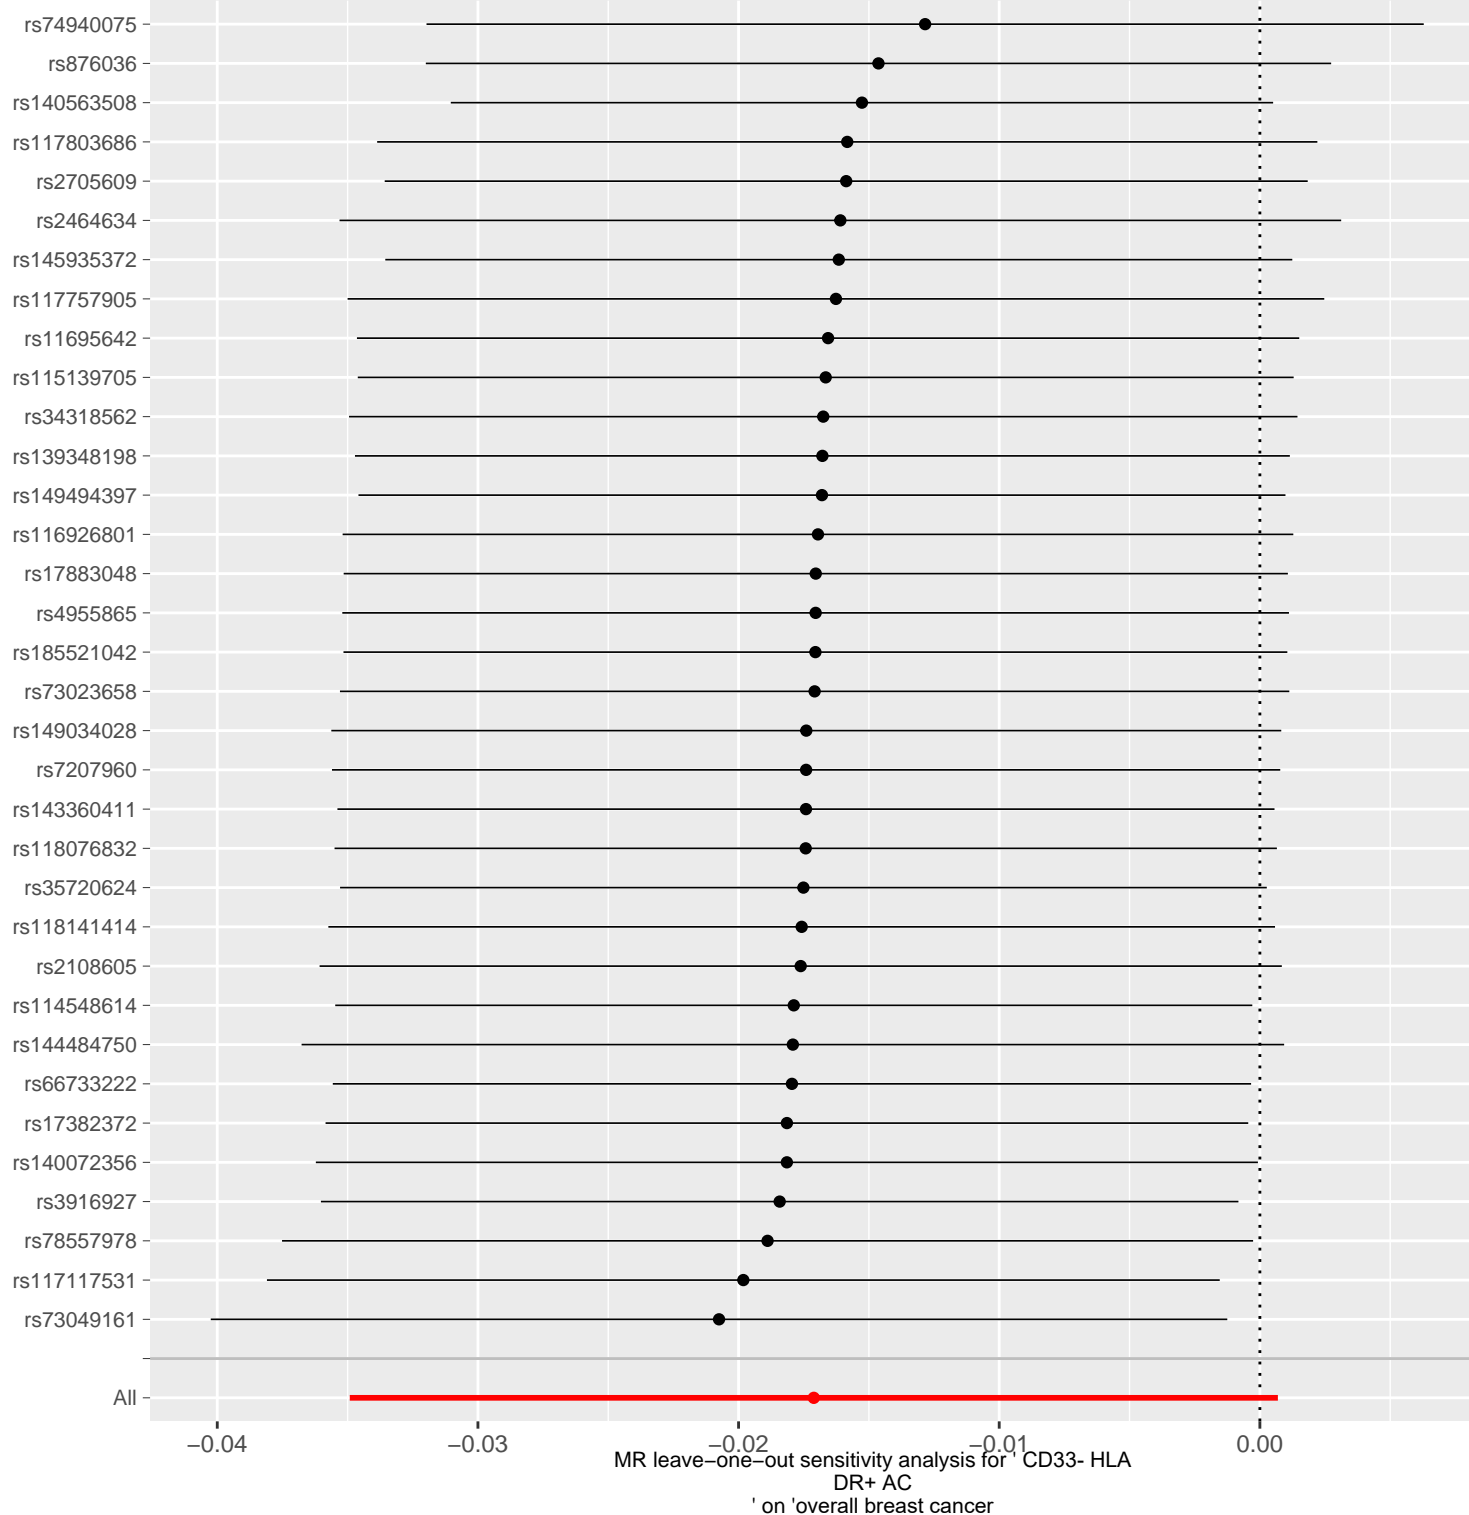

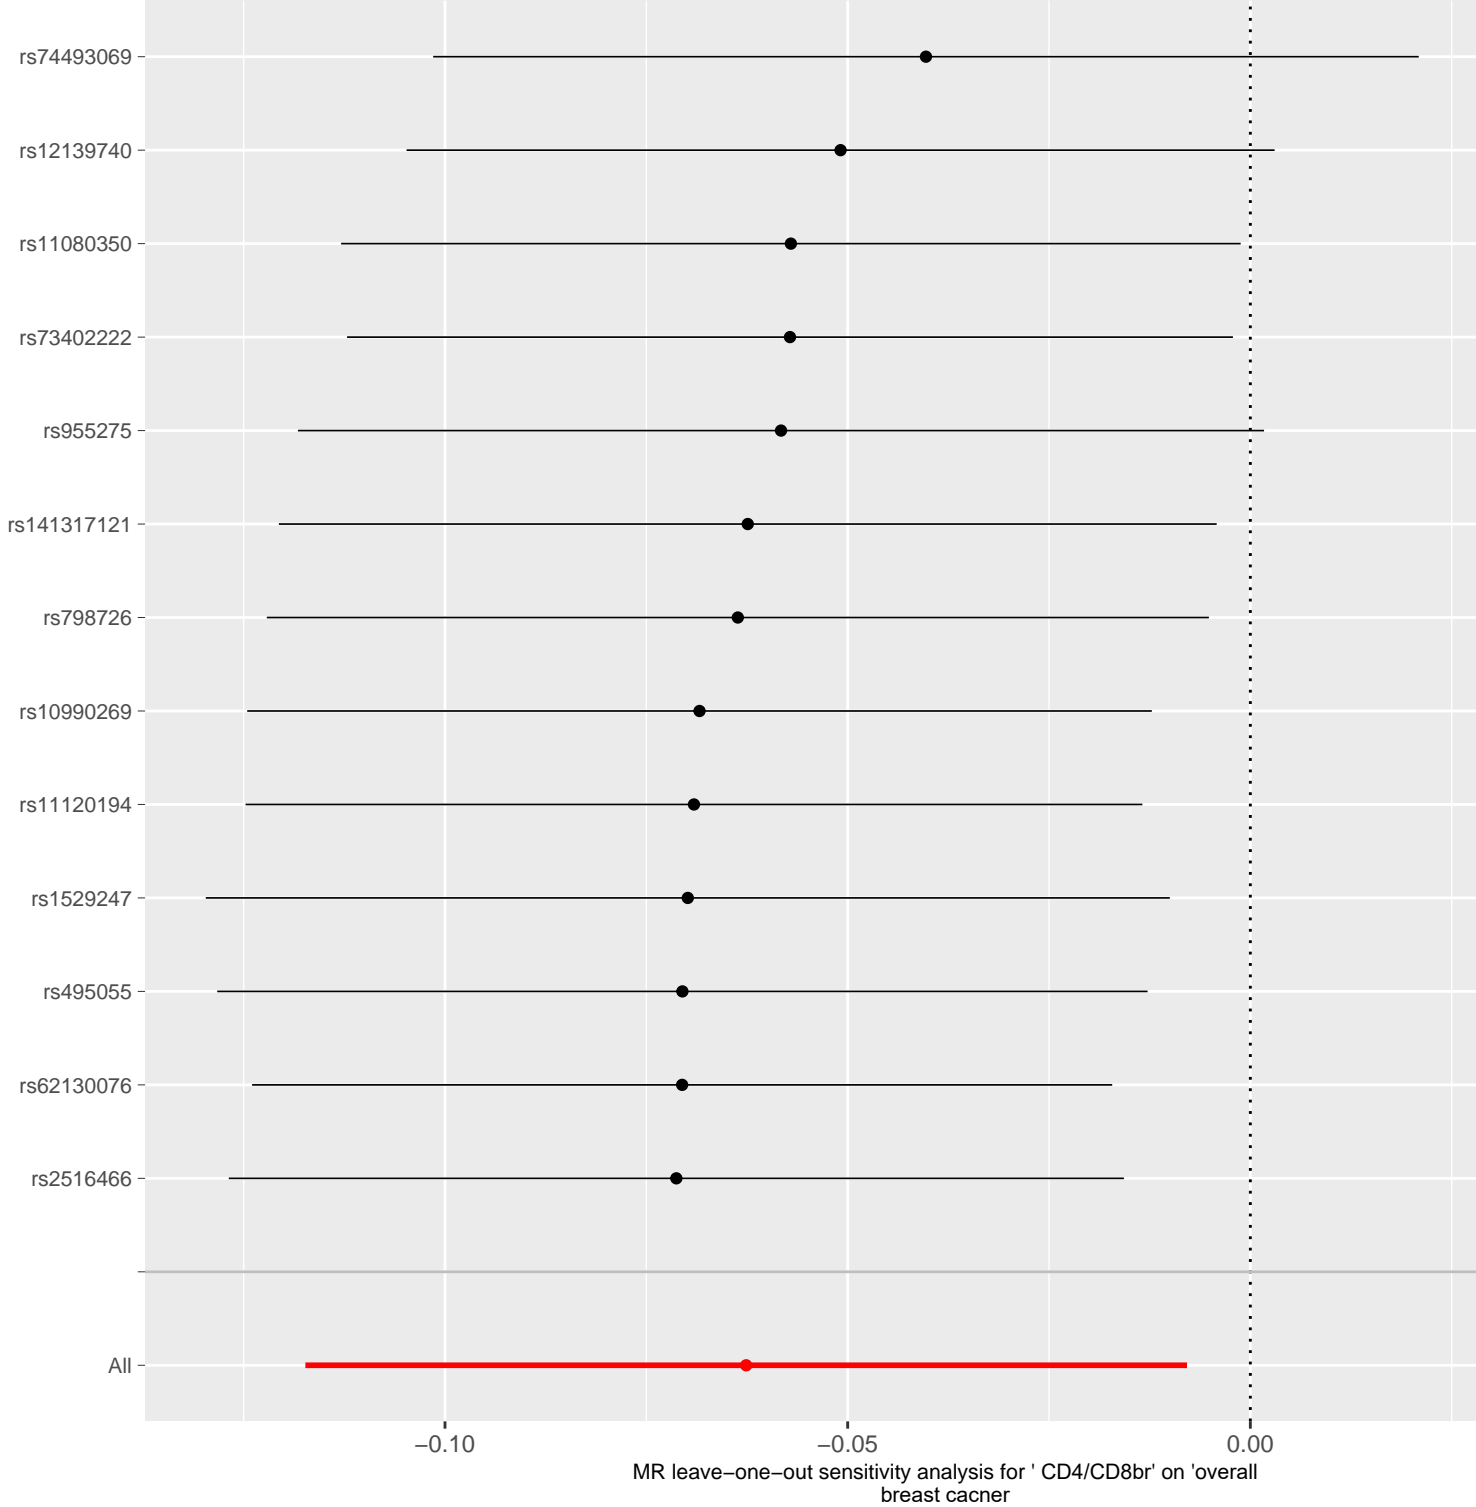



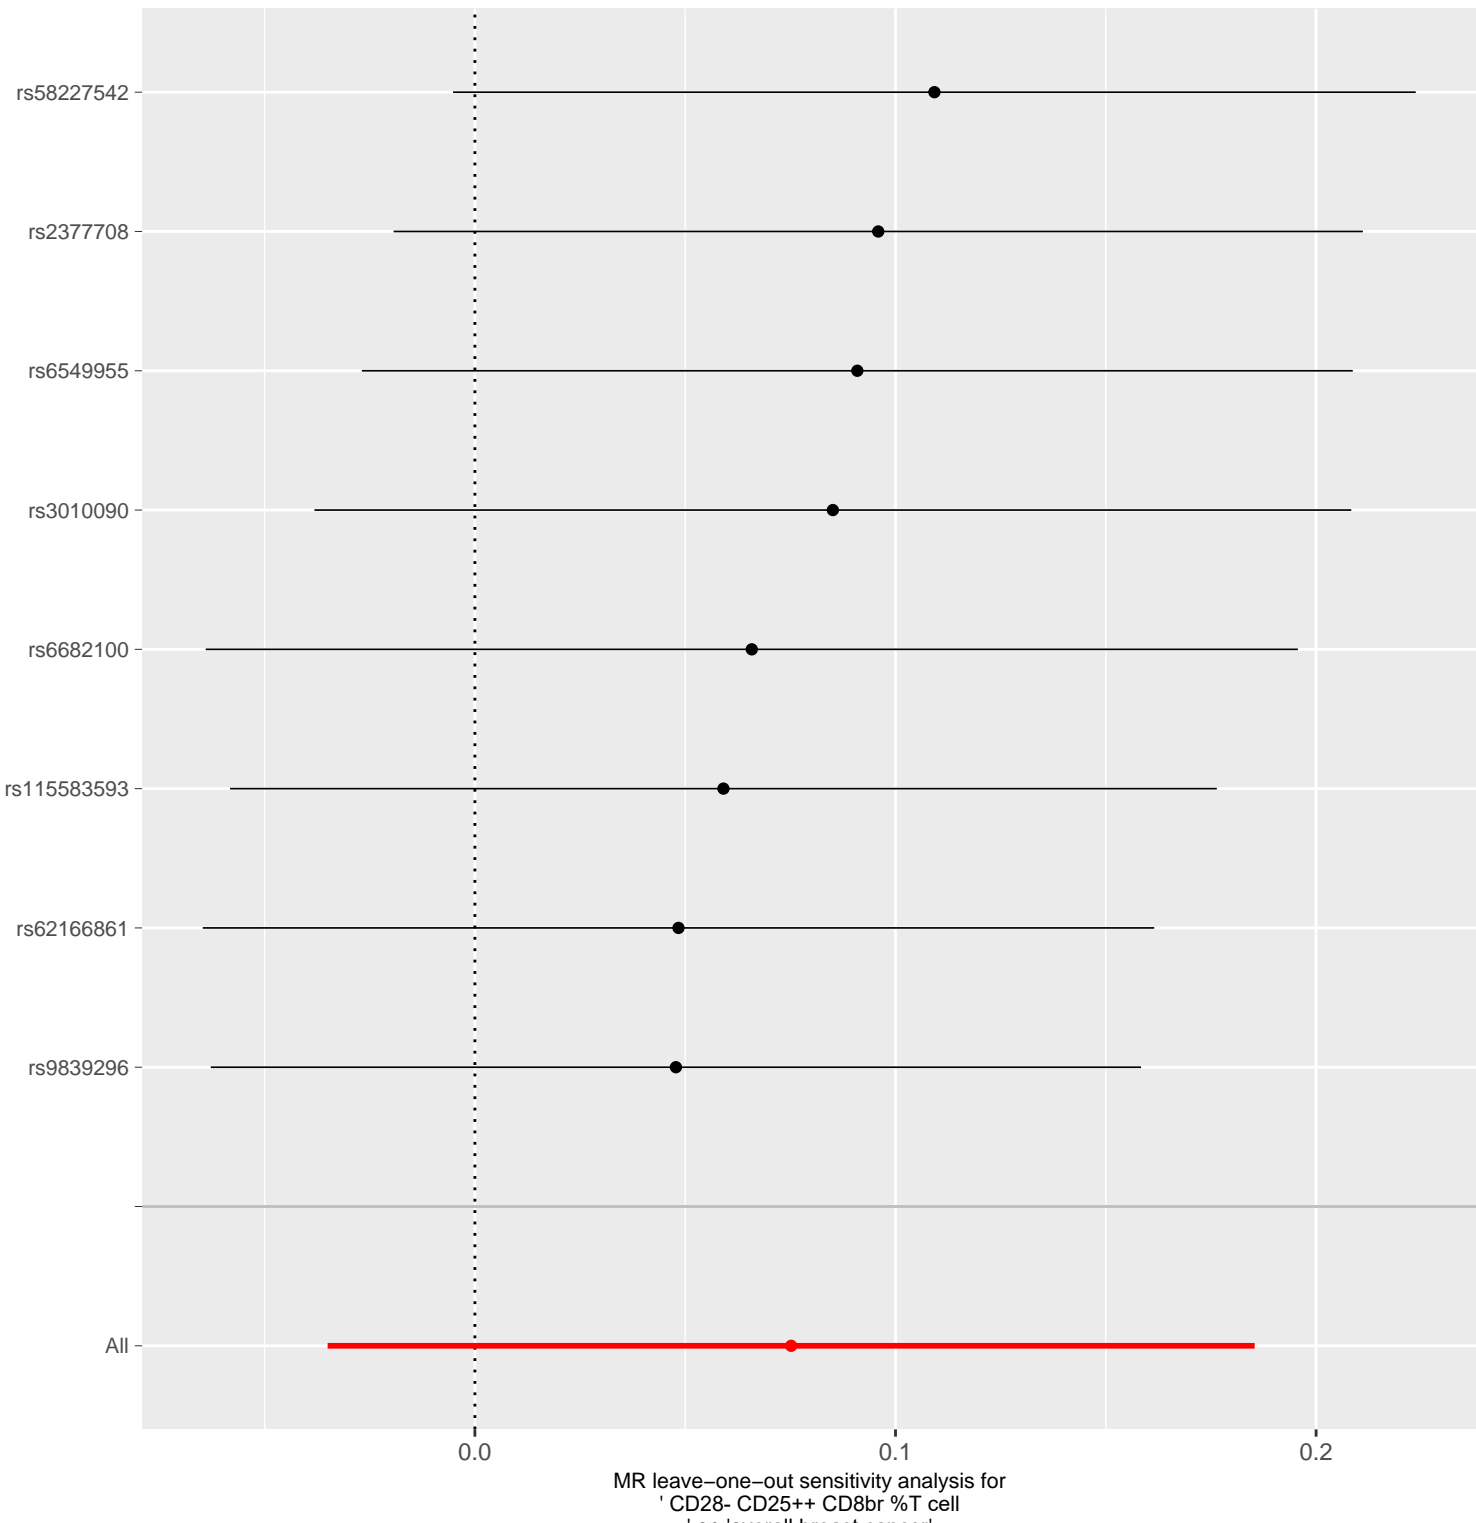

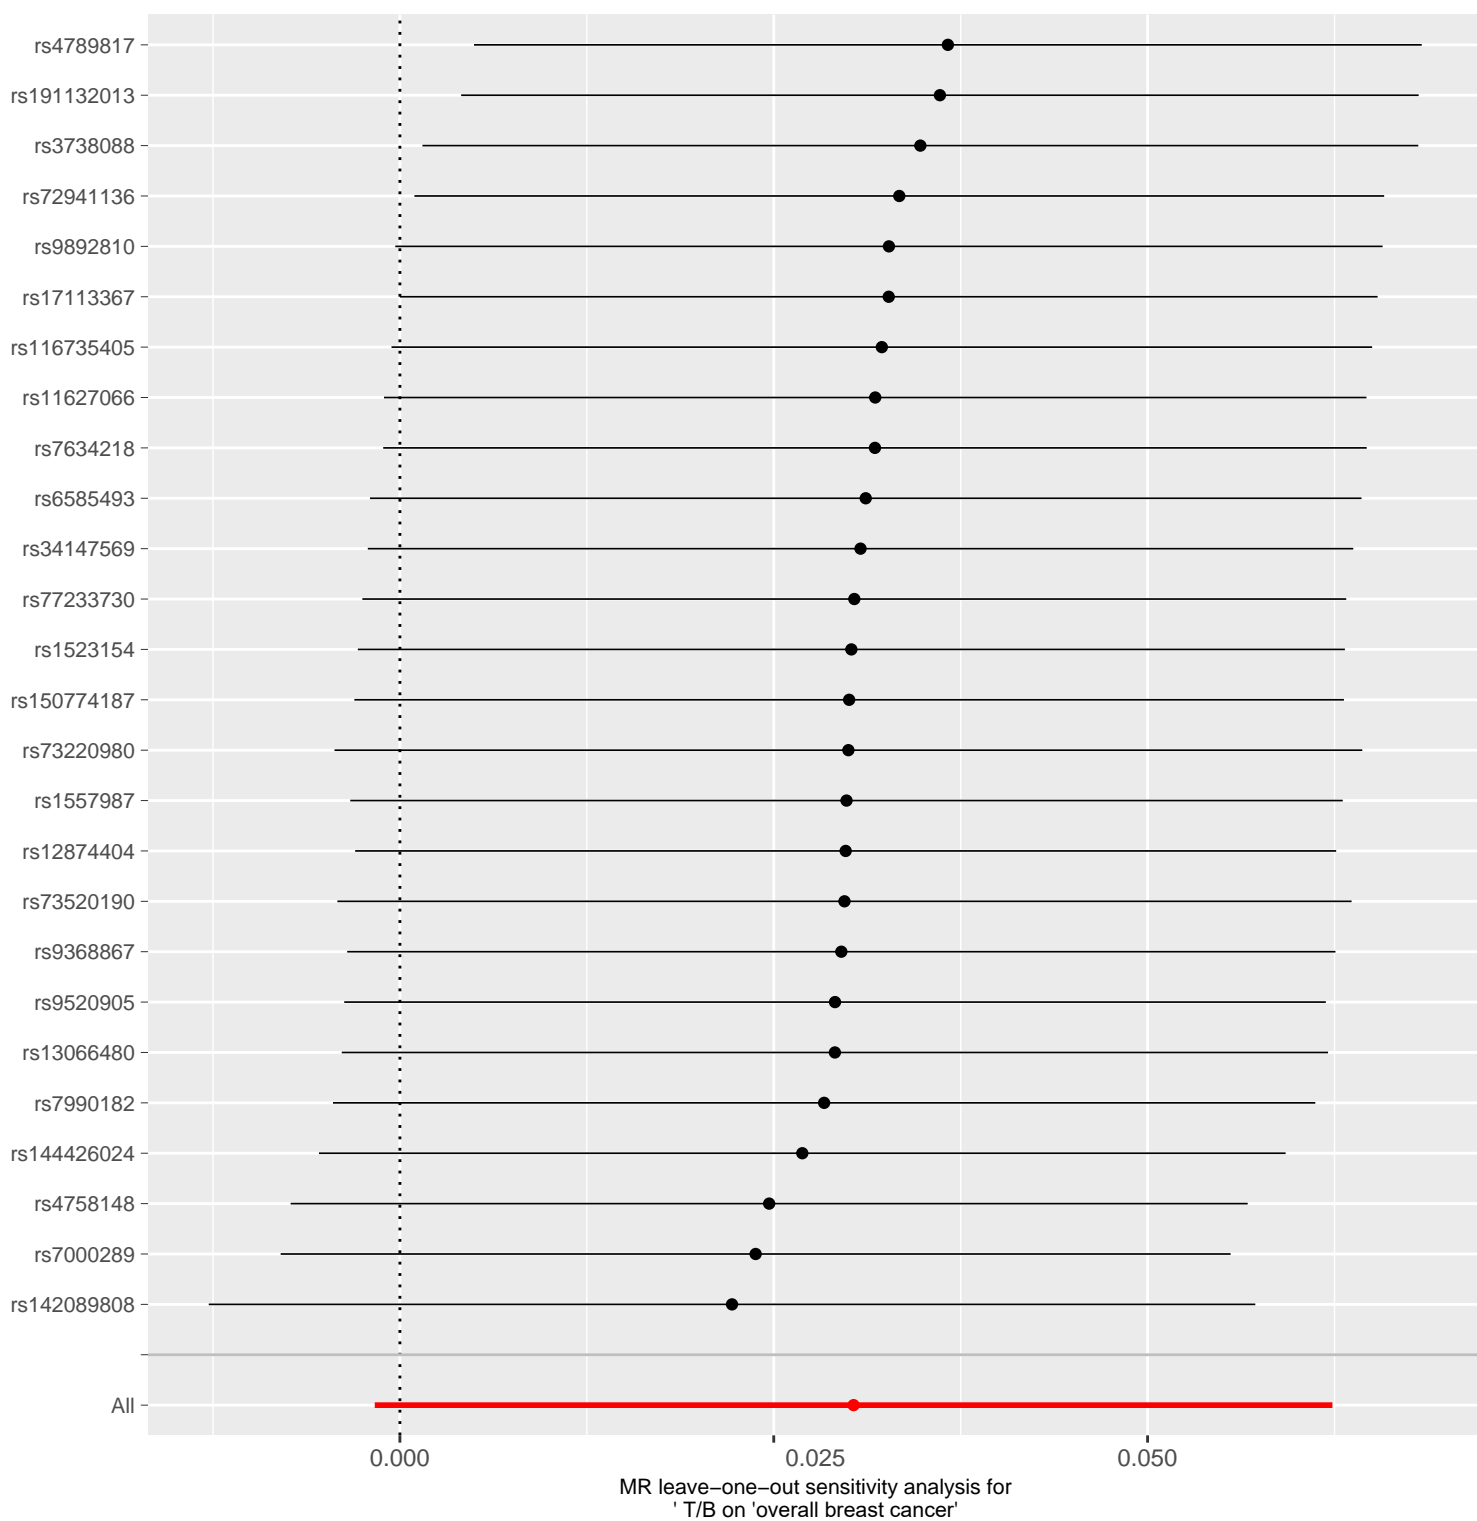

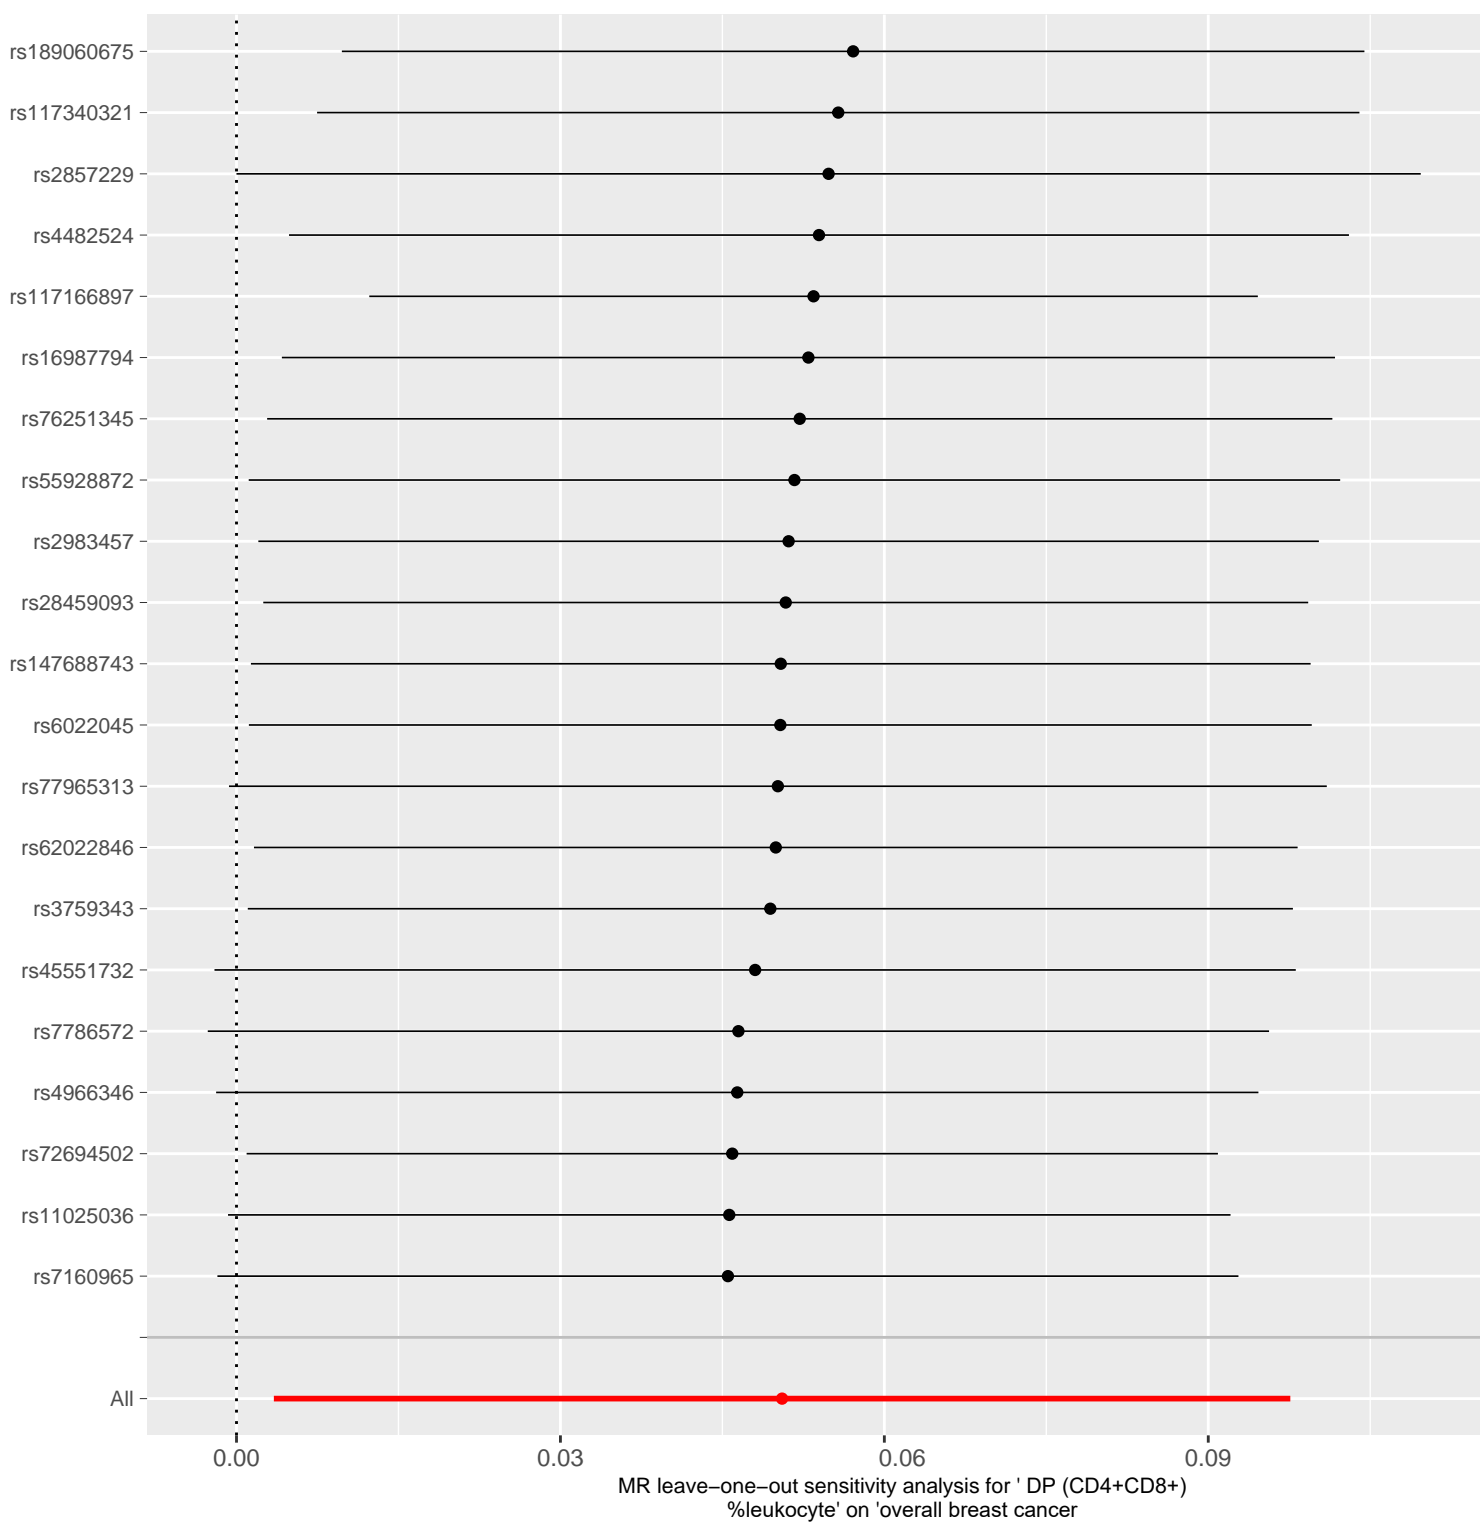

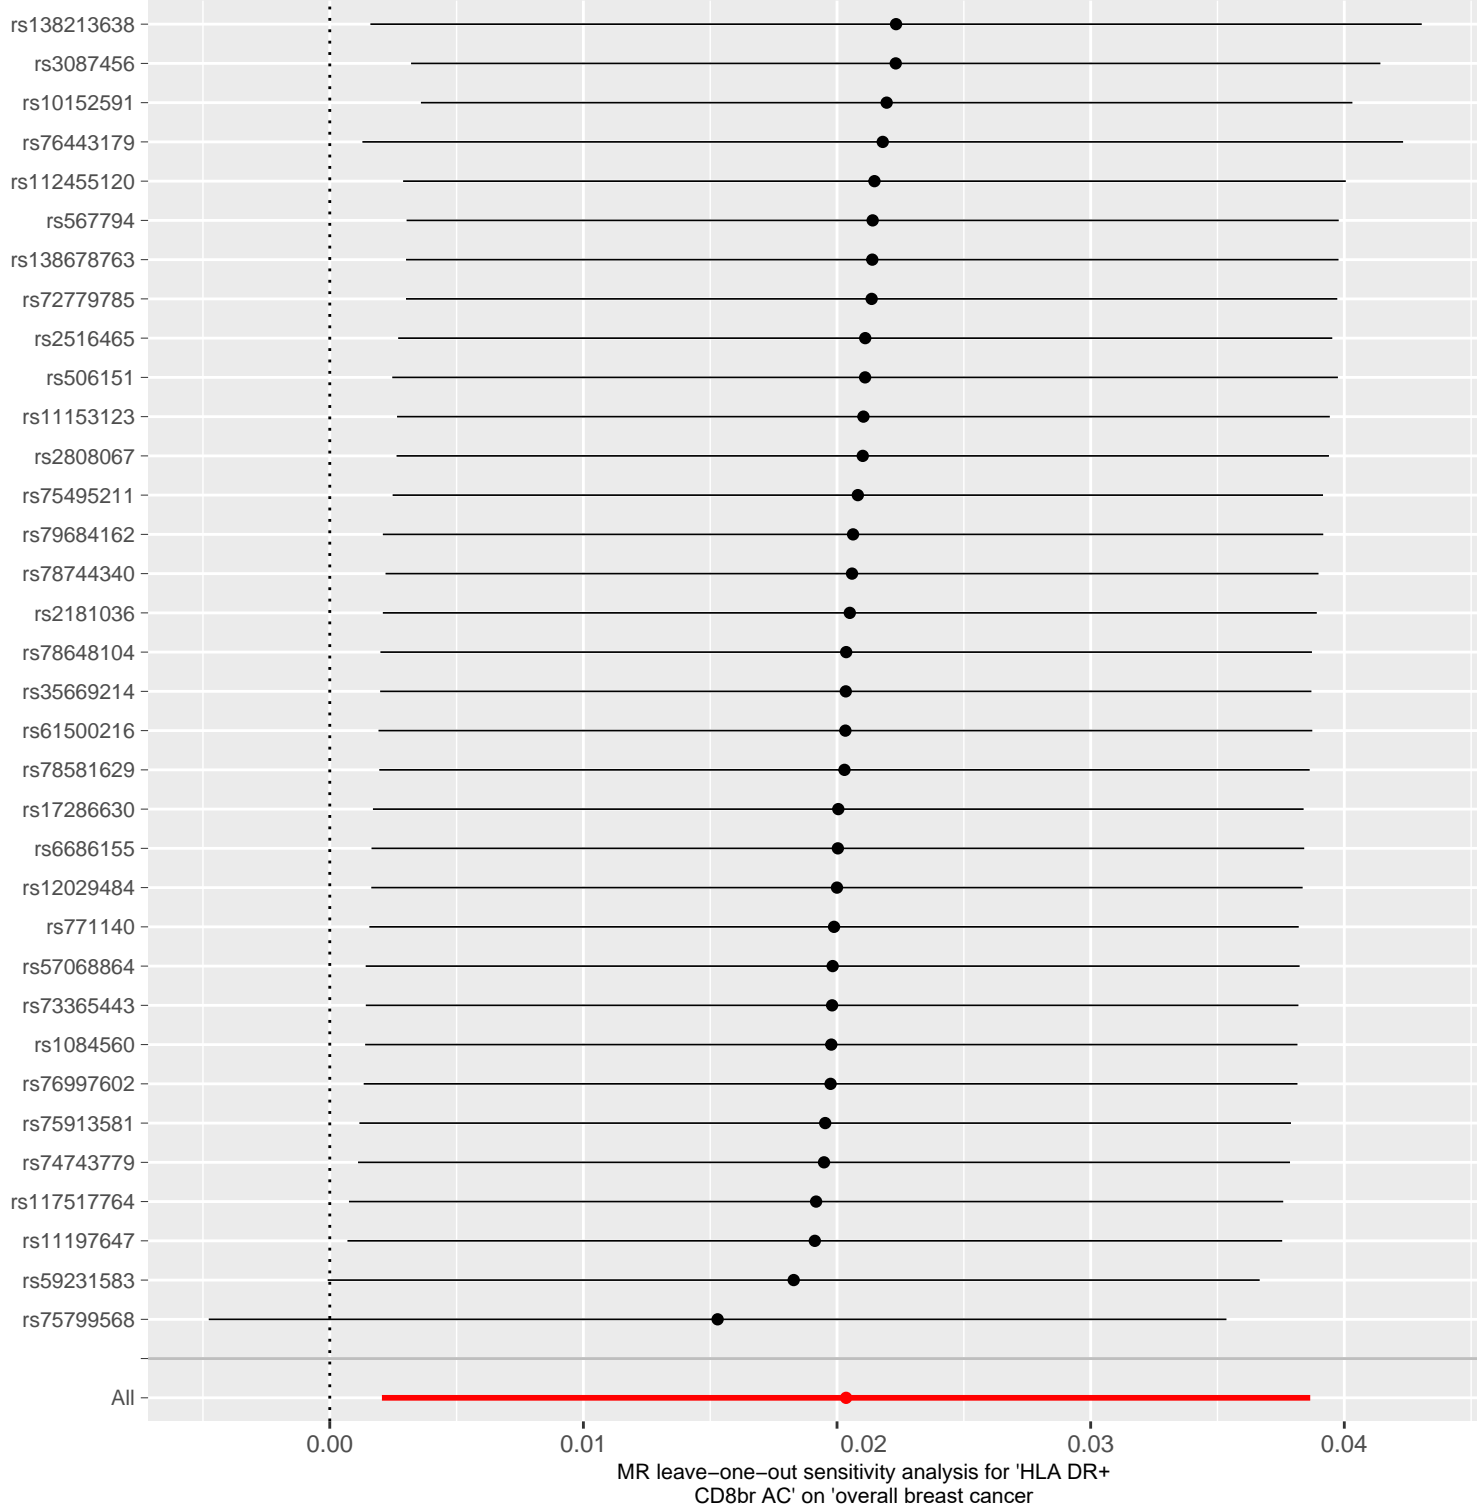

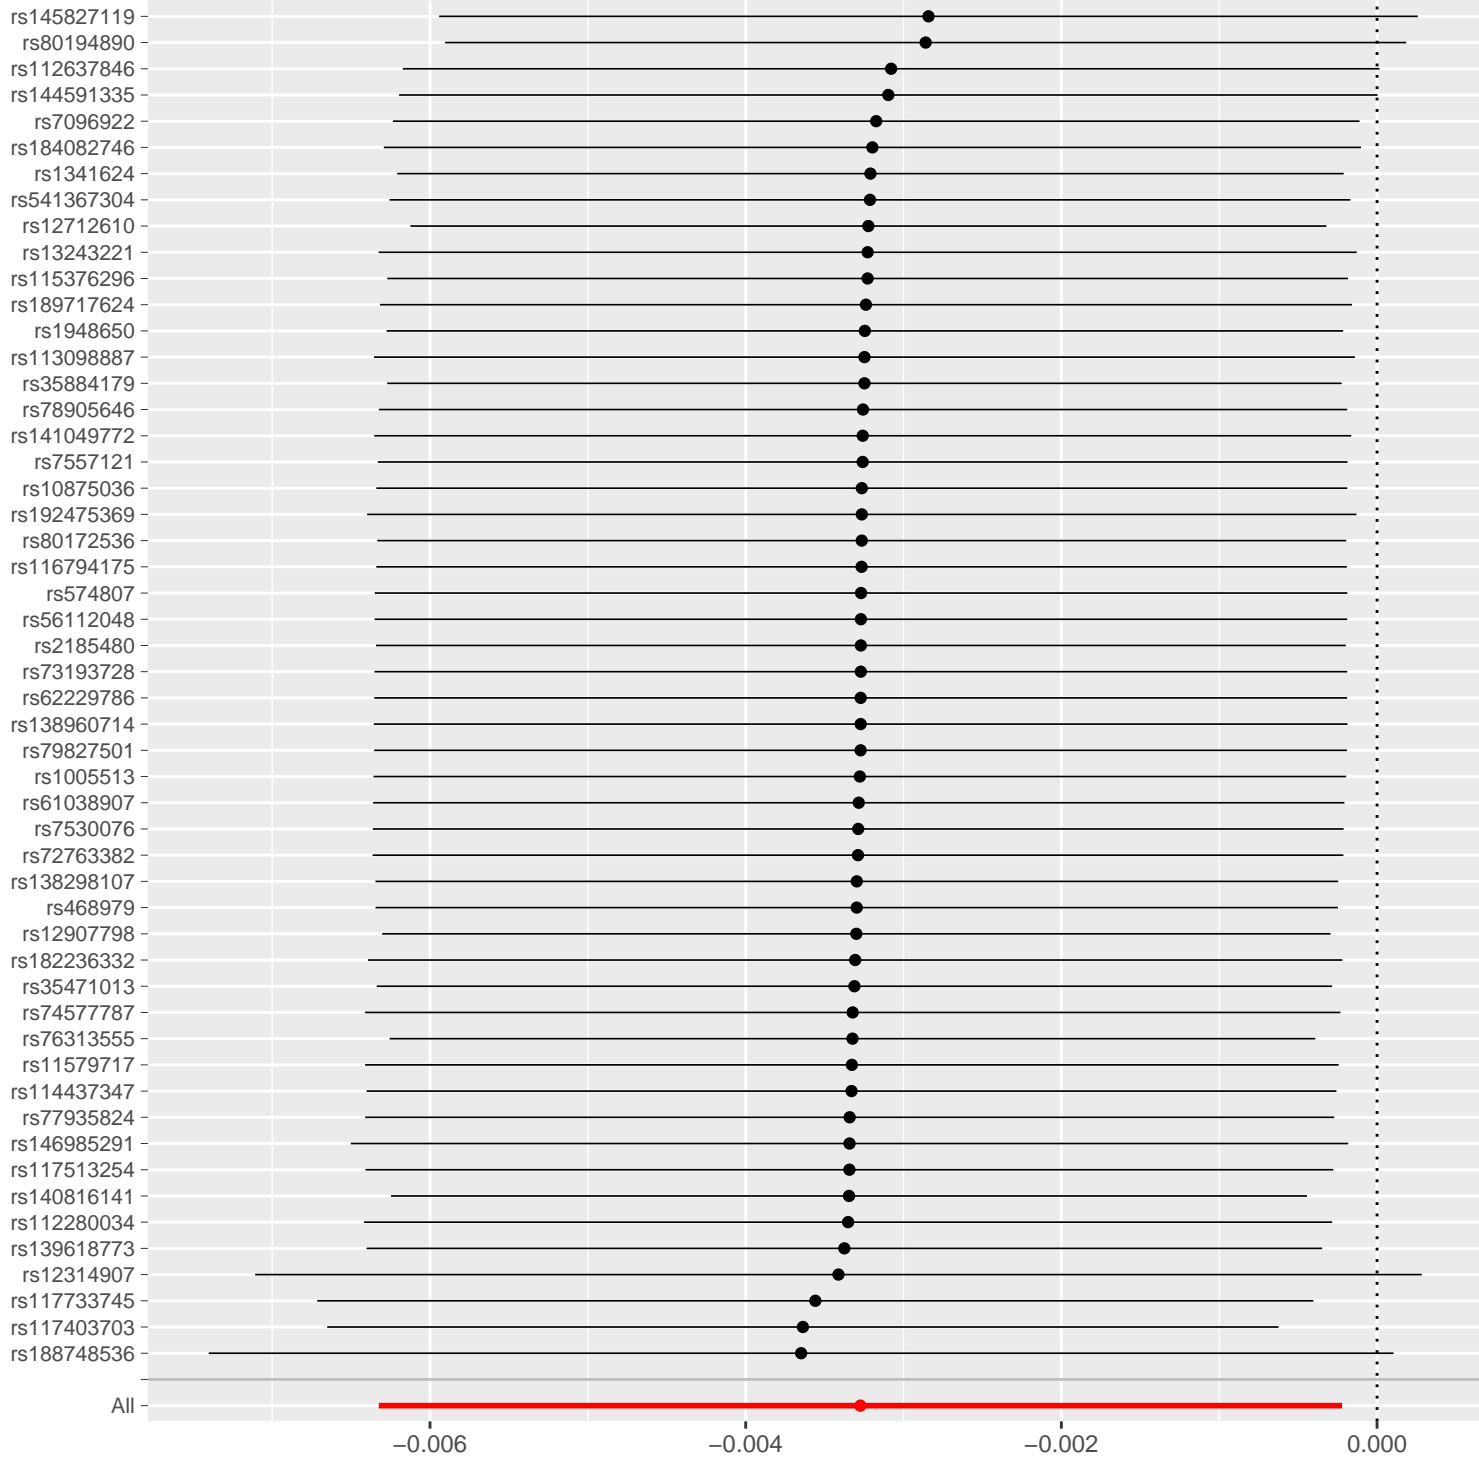

MR leave-one-out sensitivity analysis for 'CD28+ CD45RA+ CD8dim AC on 'overall breast cancer'

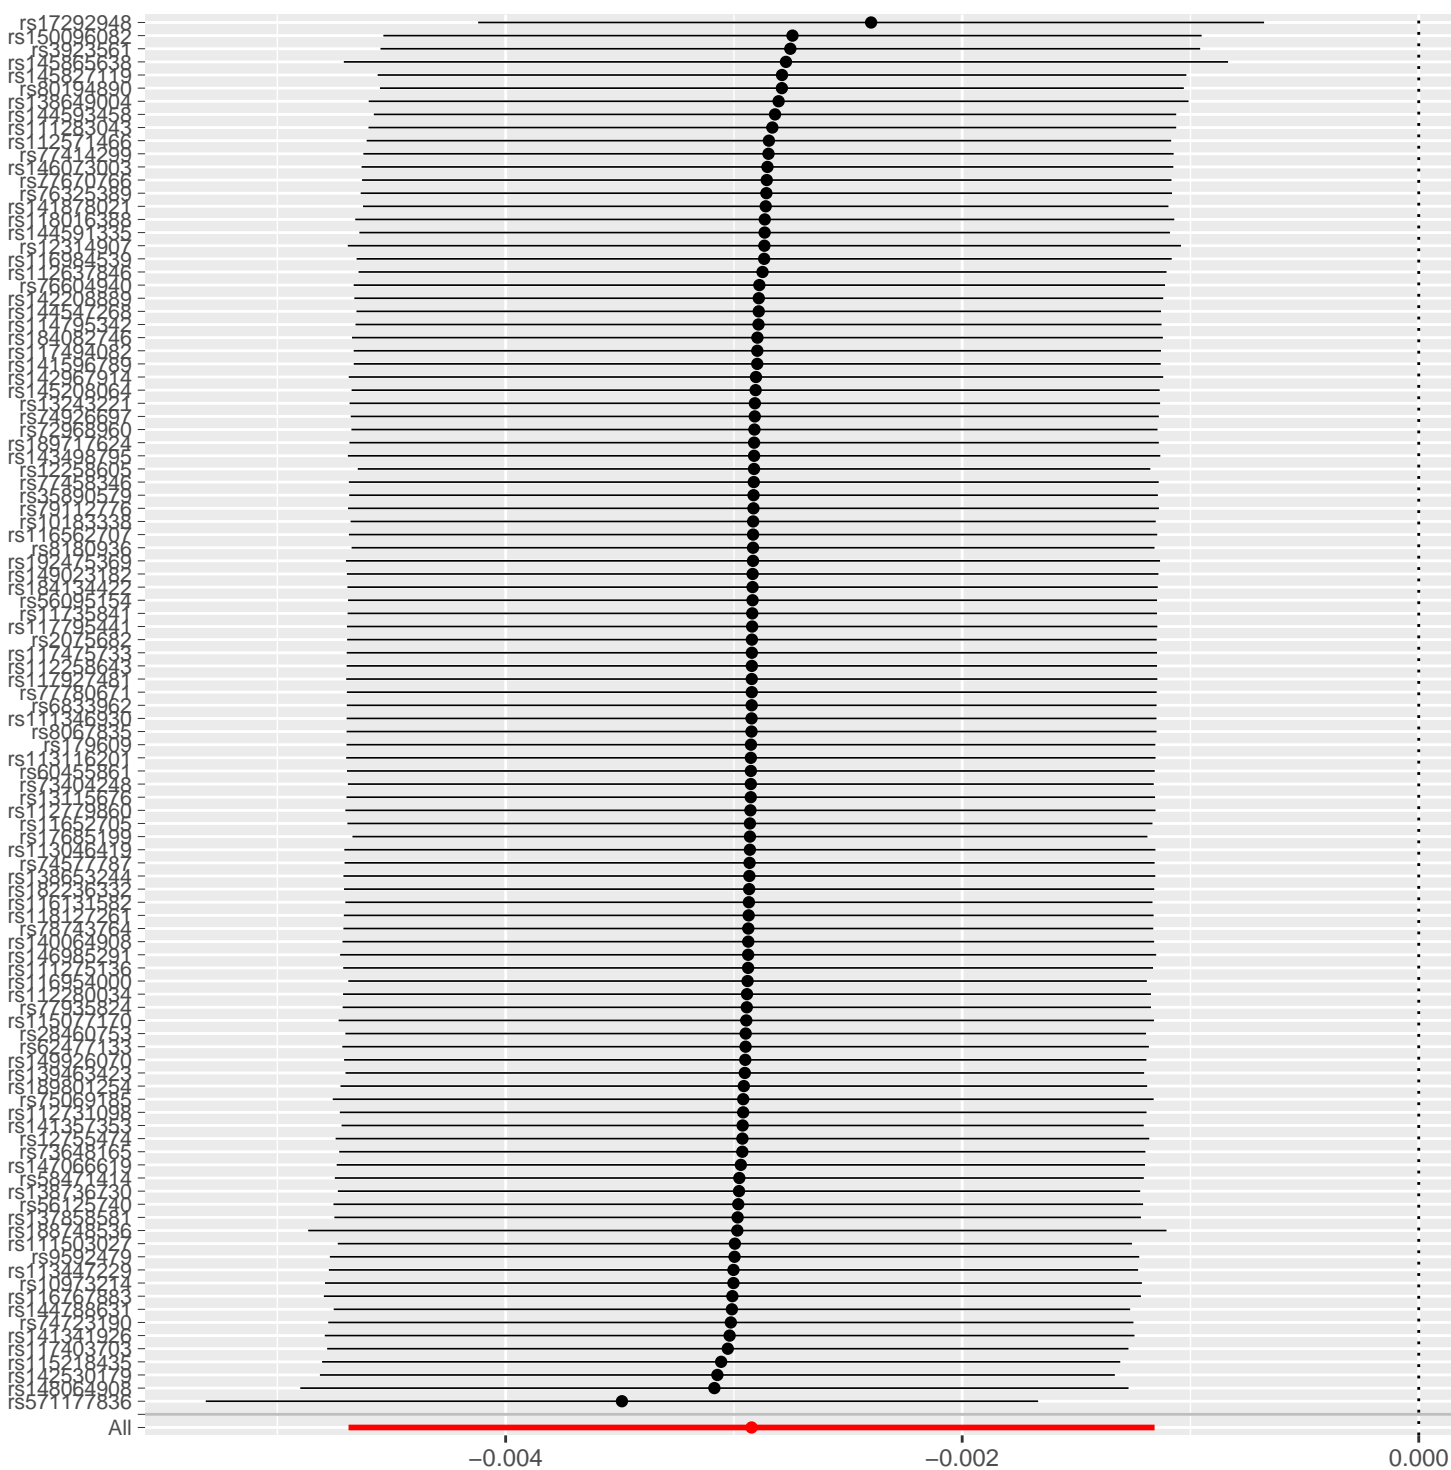

MR leave-one-out sensitivity analysis for 'CD28+ CD45RA+ CD8br %T cell' on 'overall breast cancer'

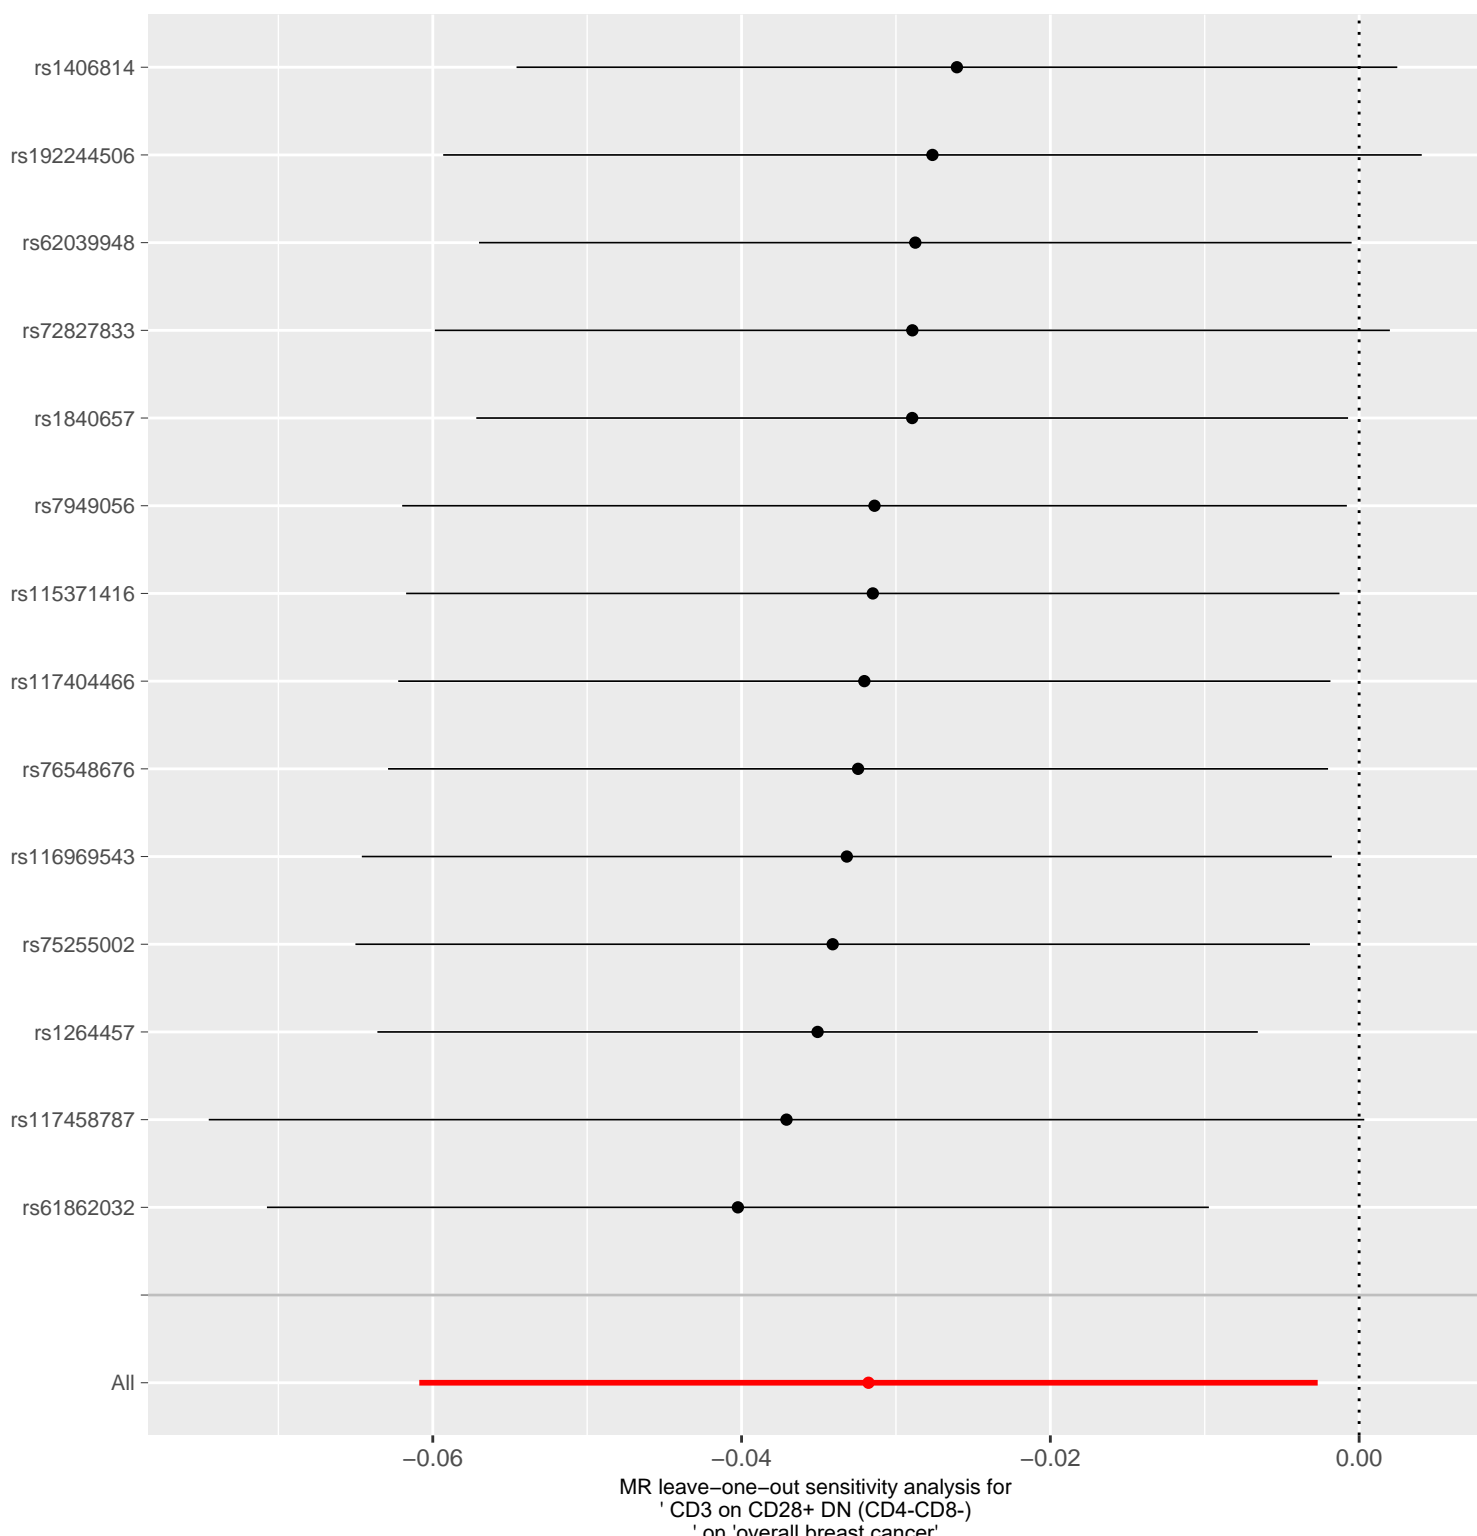

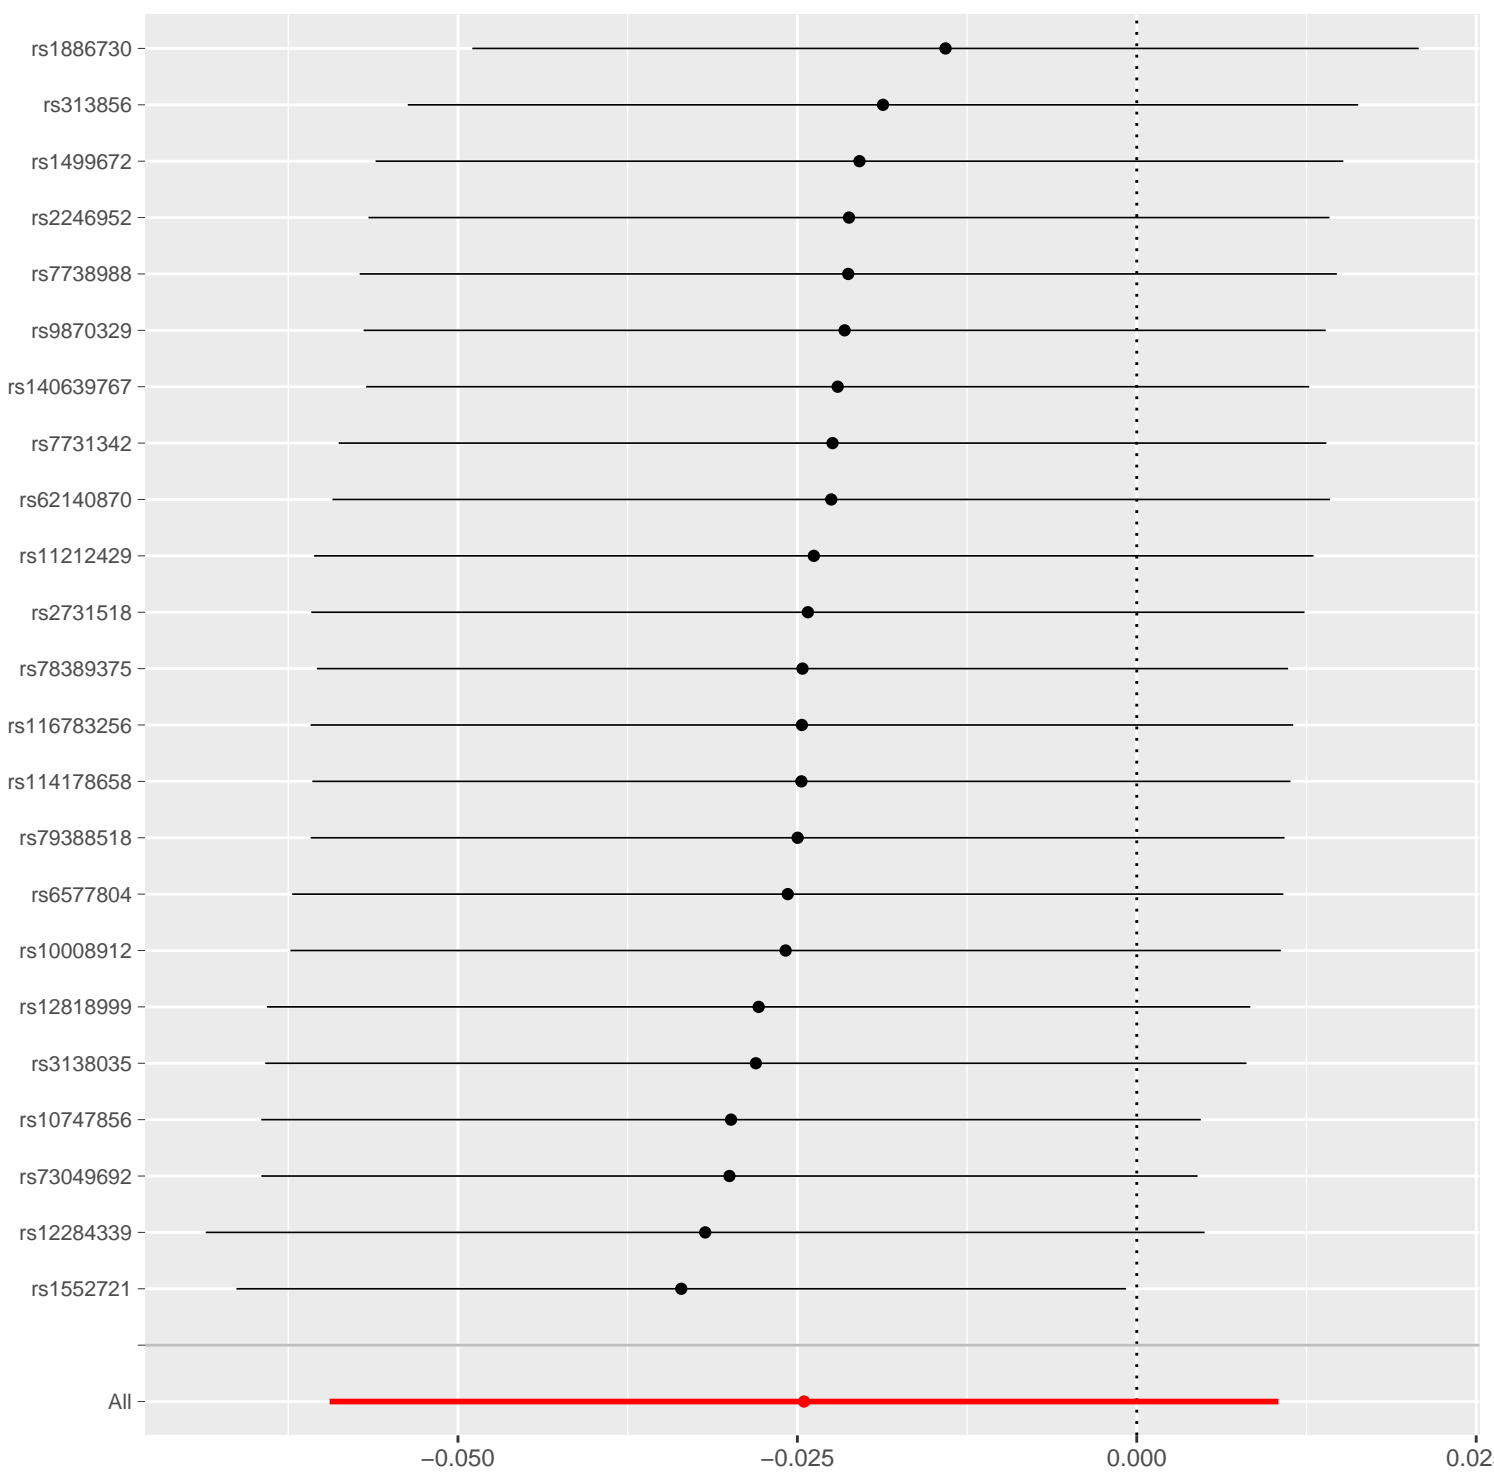



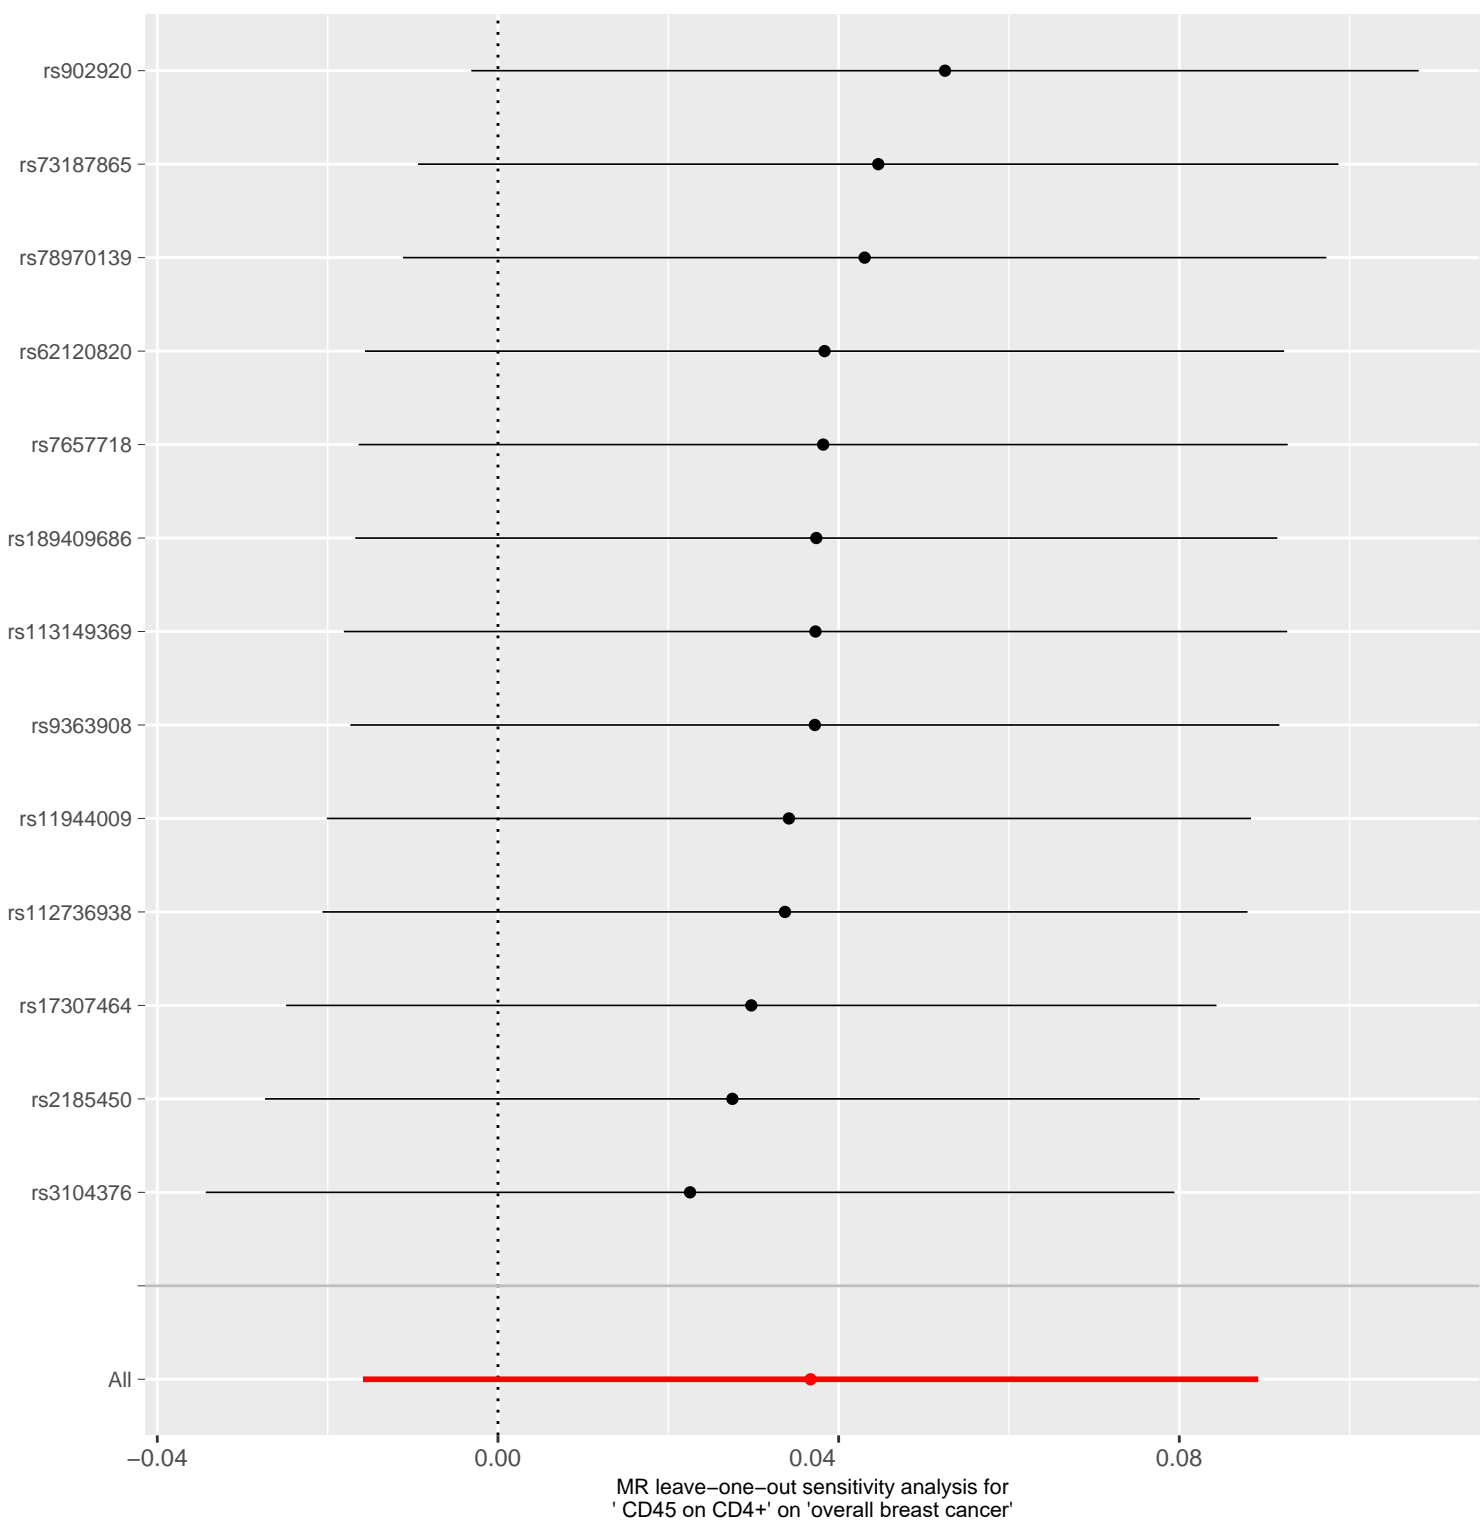

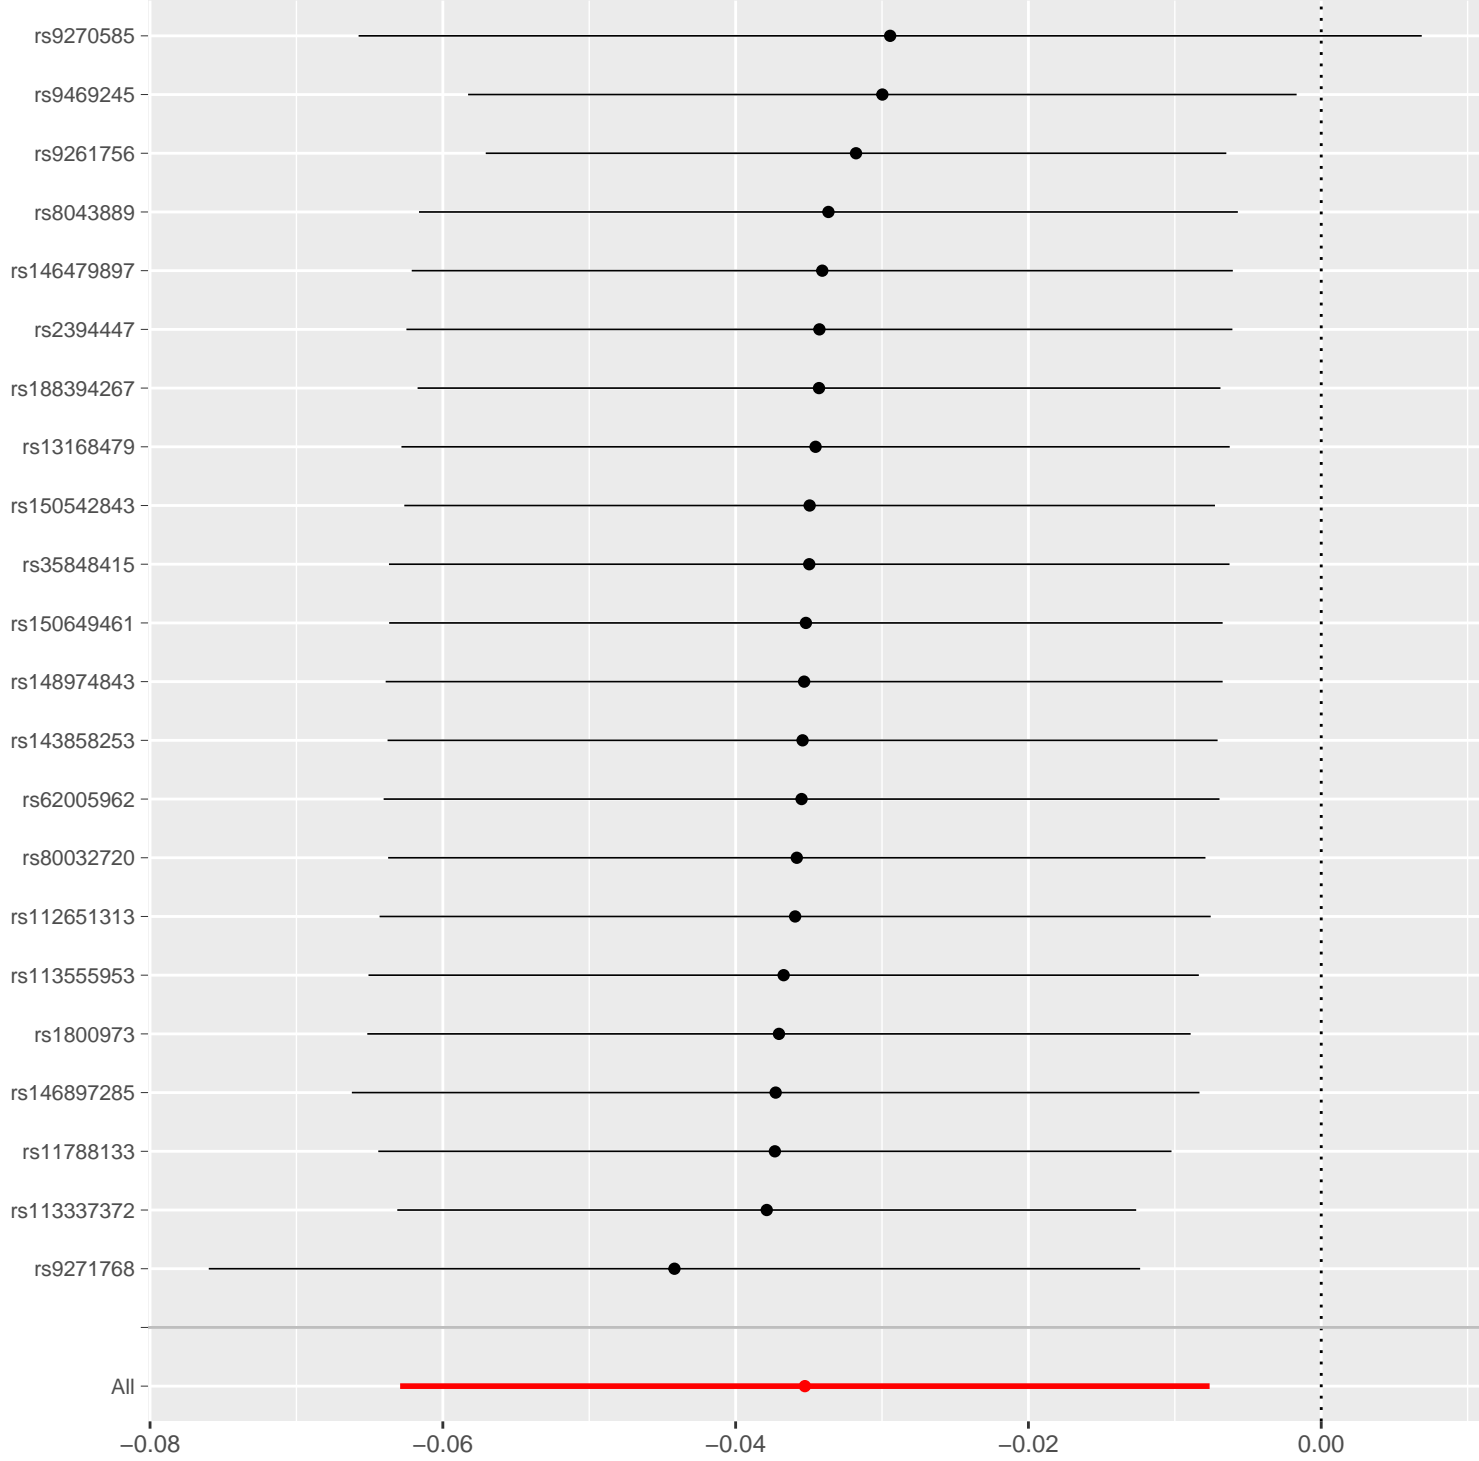

MR leave-one-out sensitivity analysis for  
'HLA DR on CD14+ CD16- monocyte  
' on 'overall breast cancer'

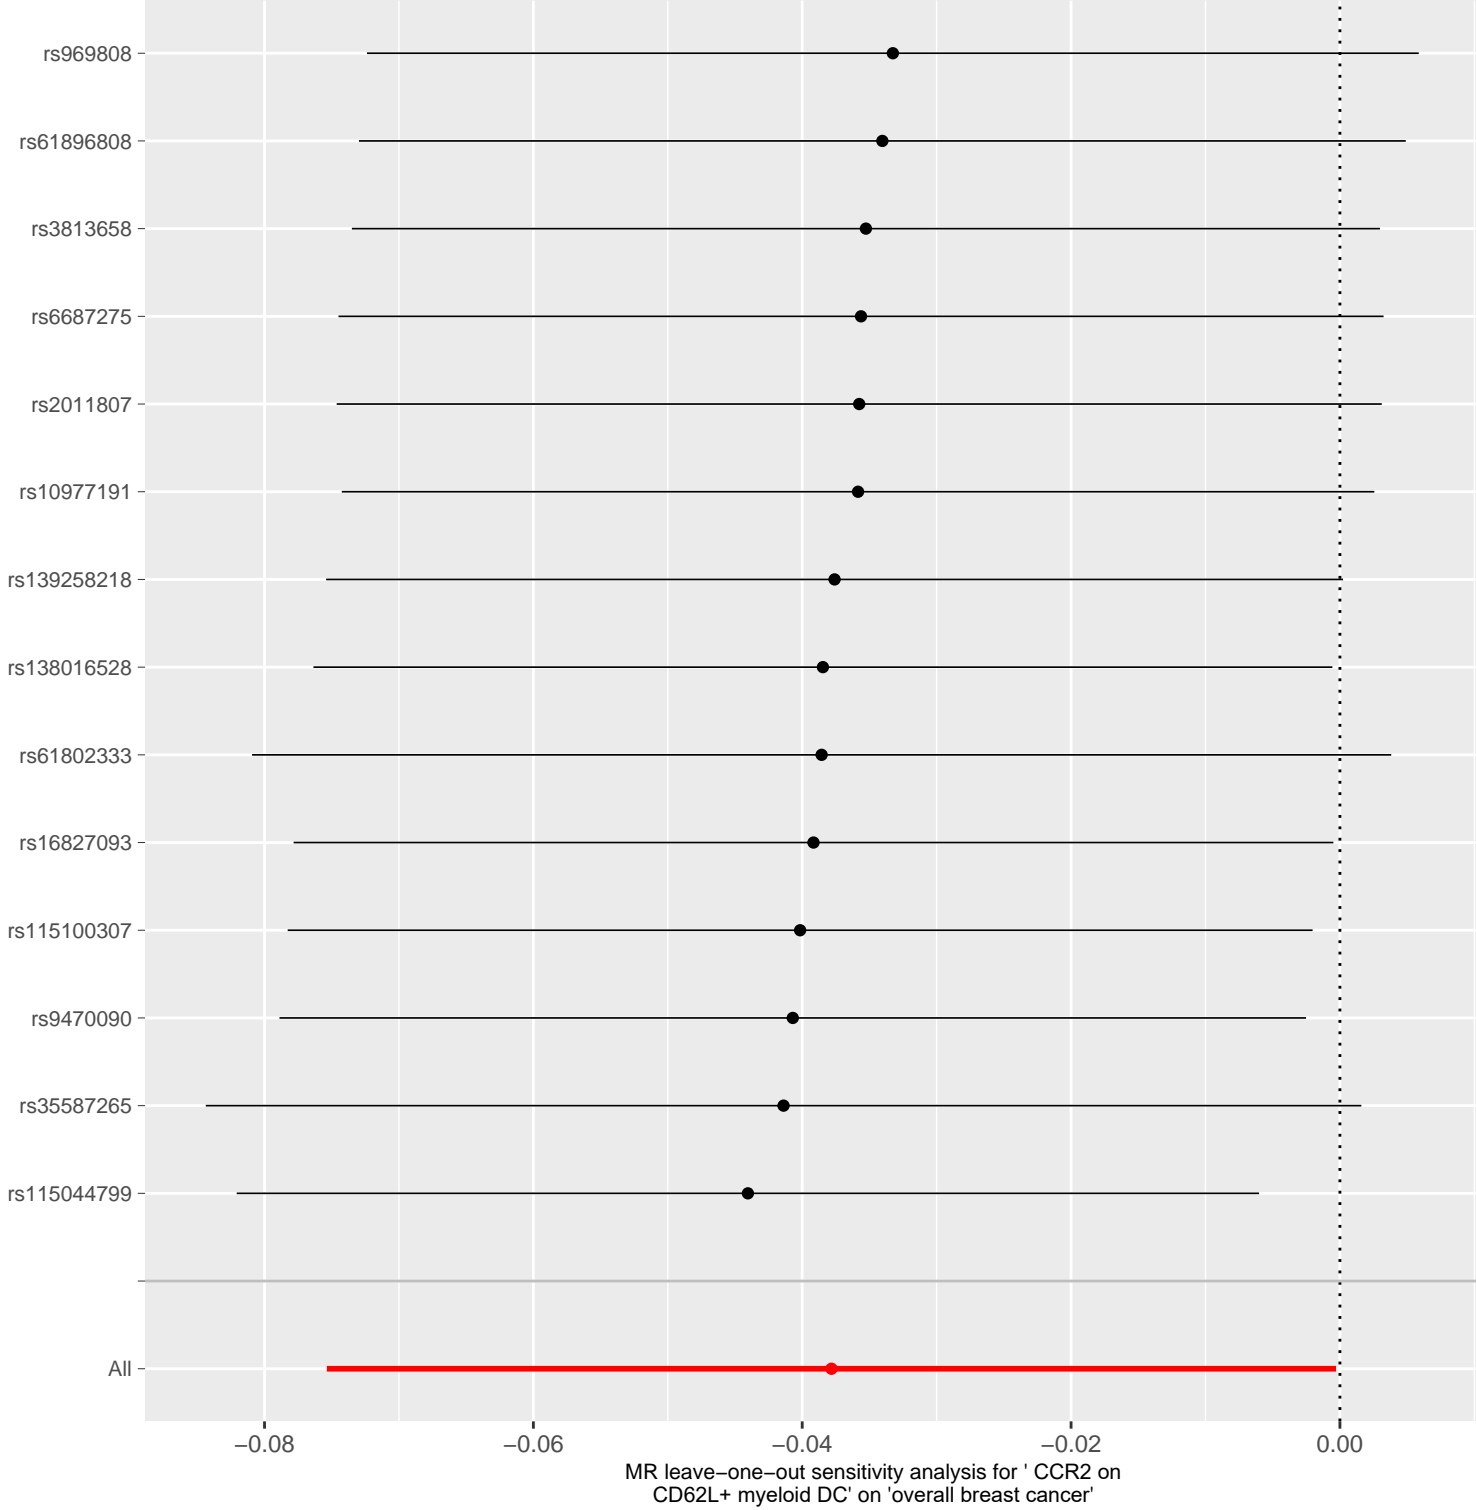

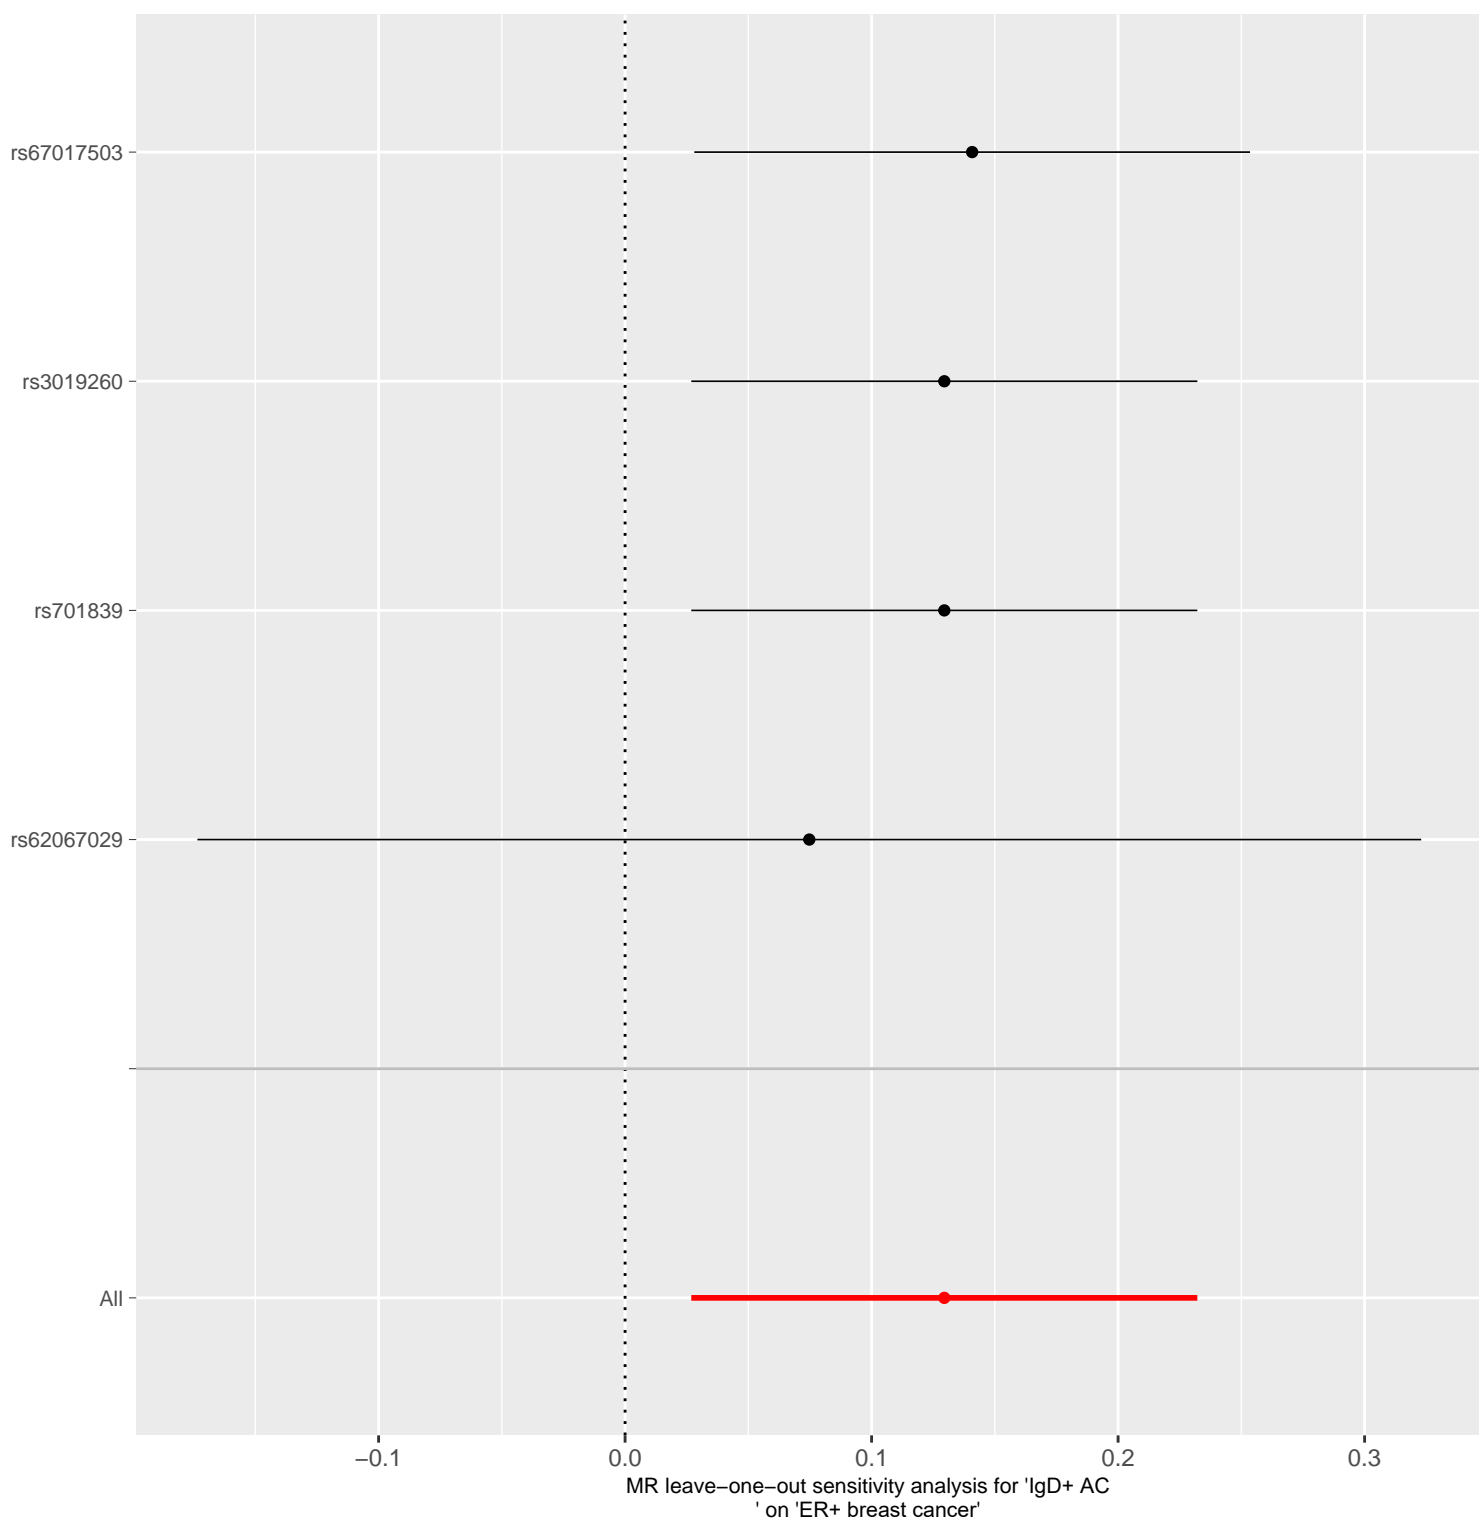

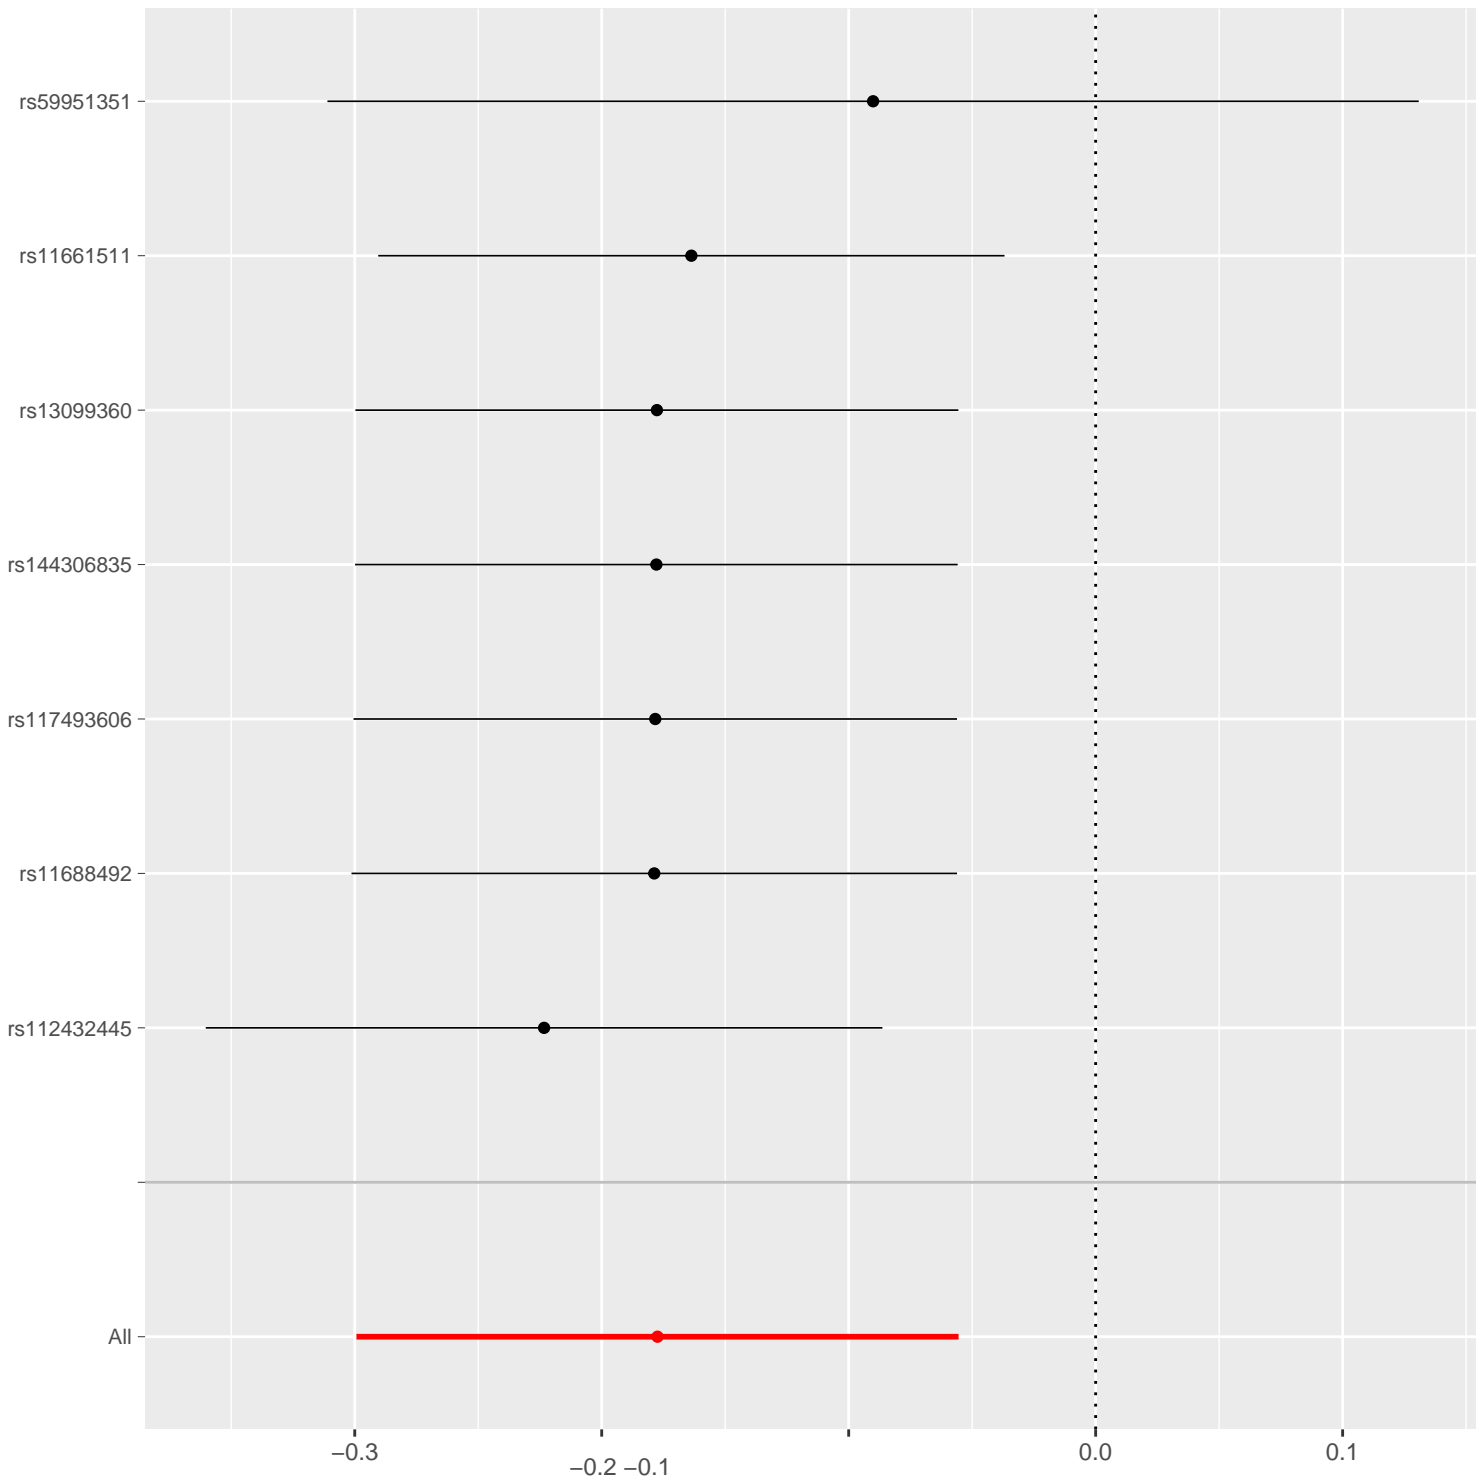

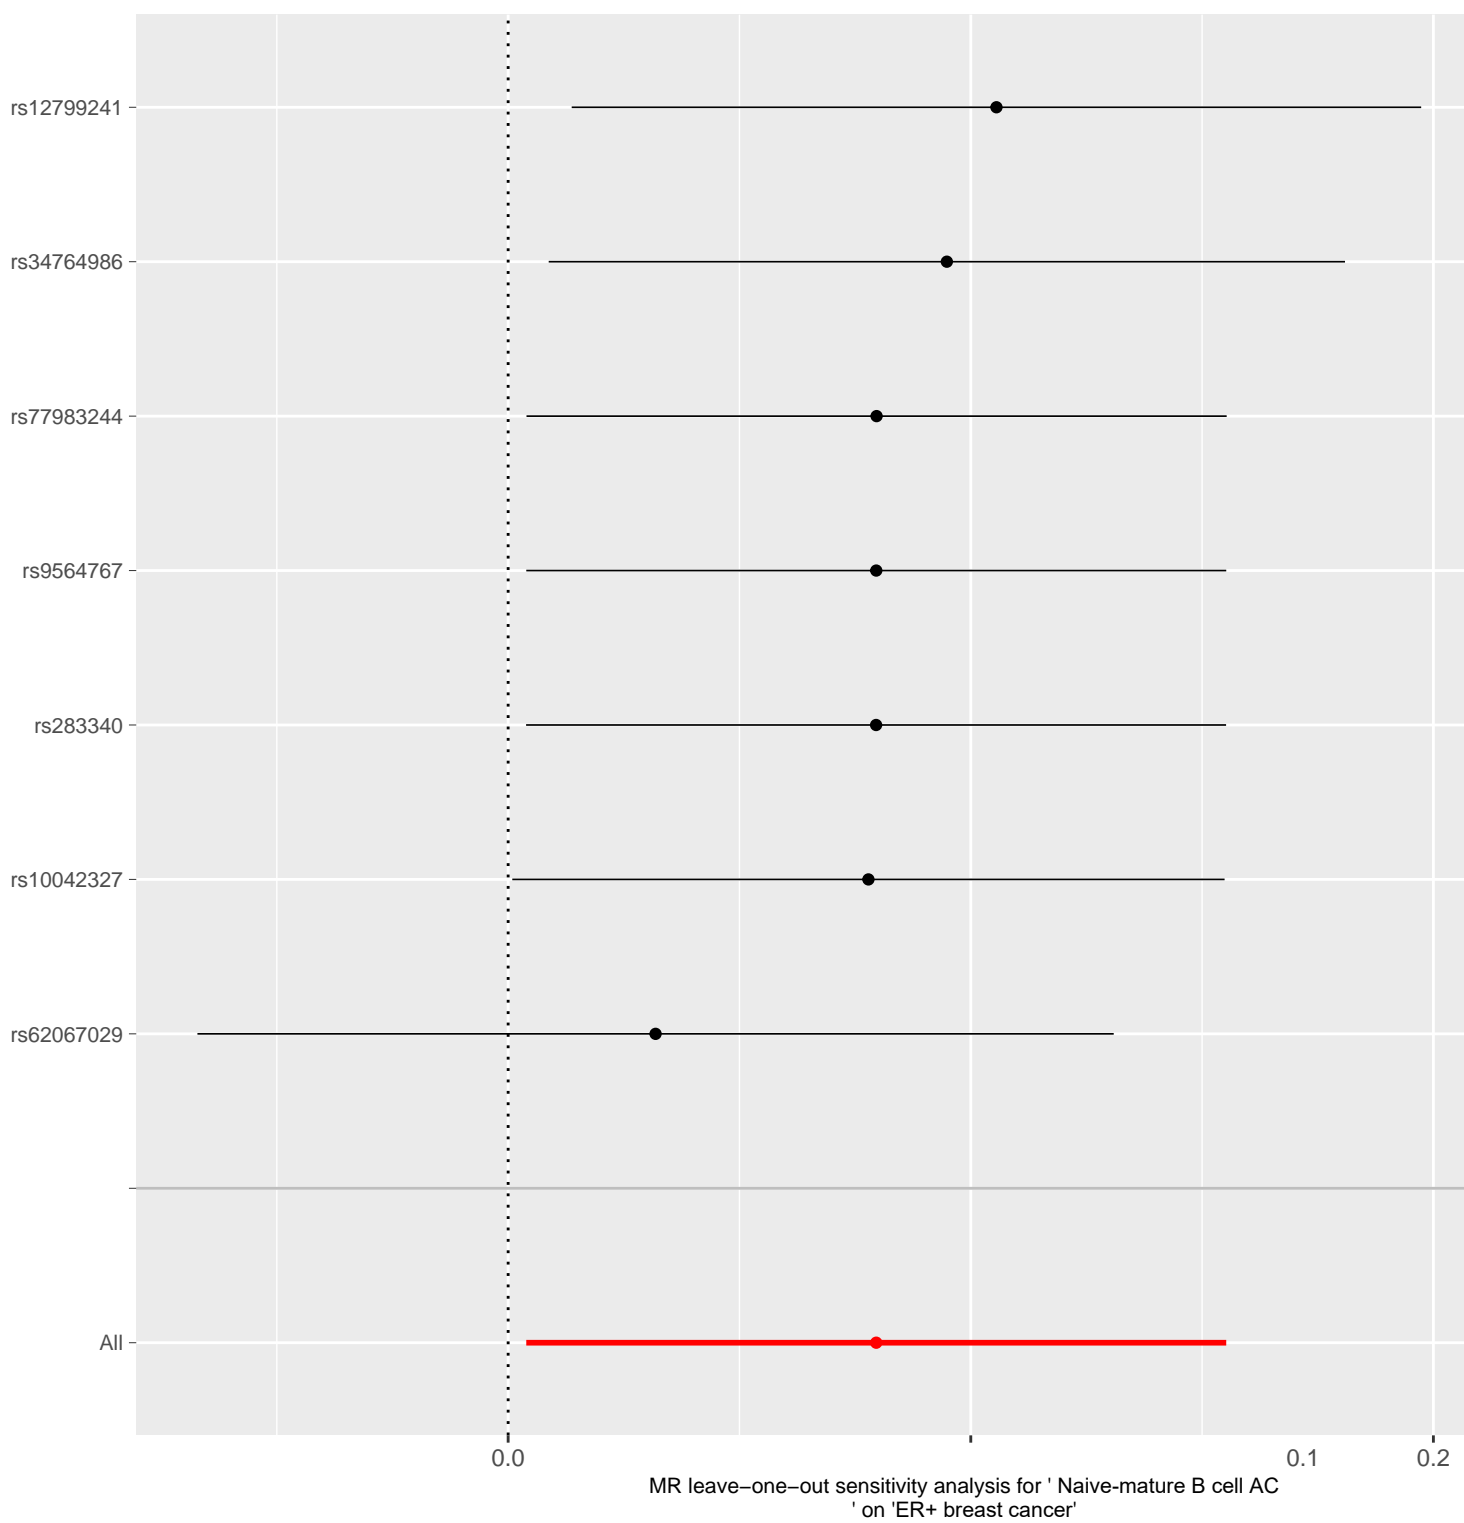

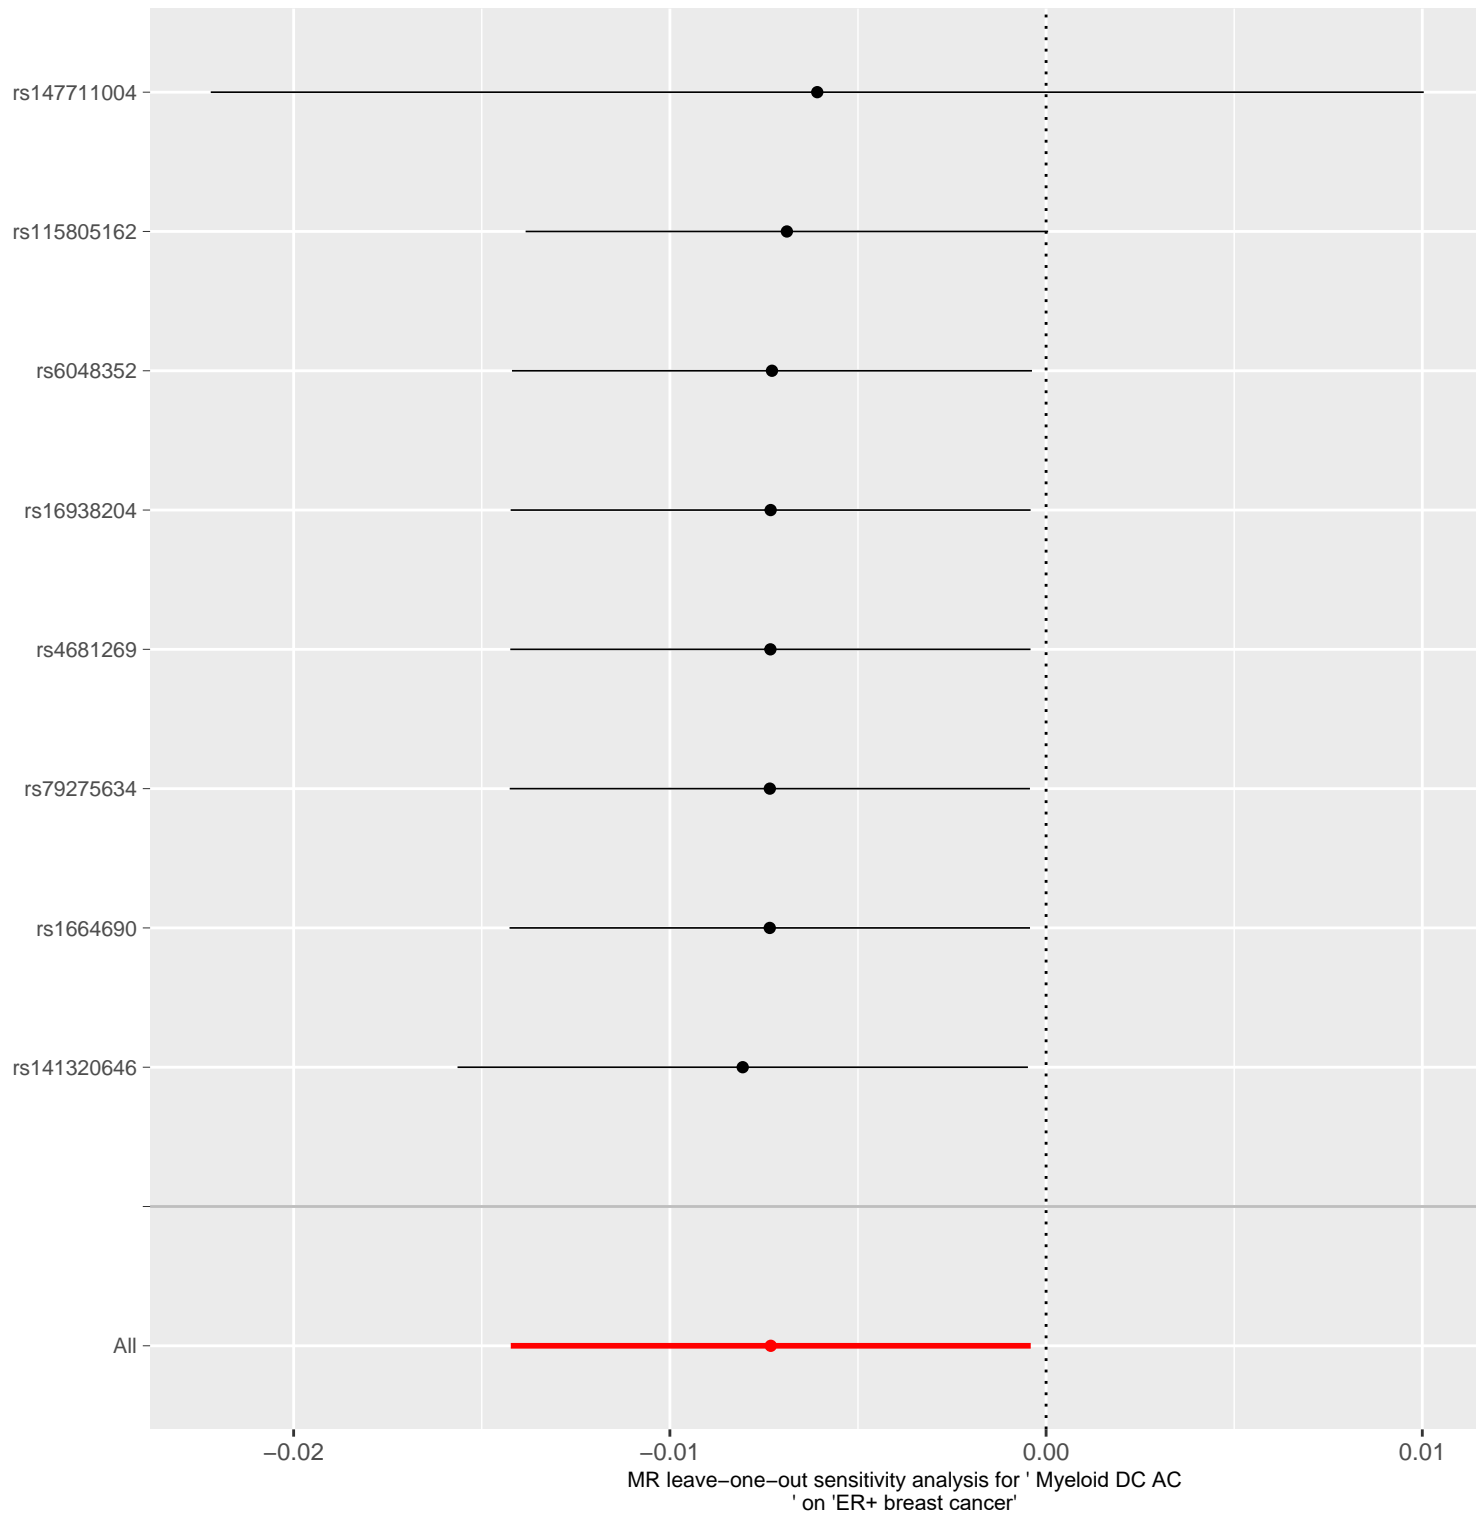

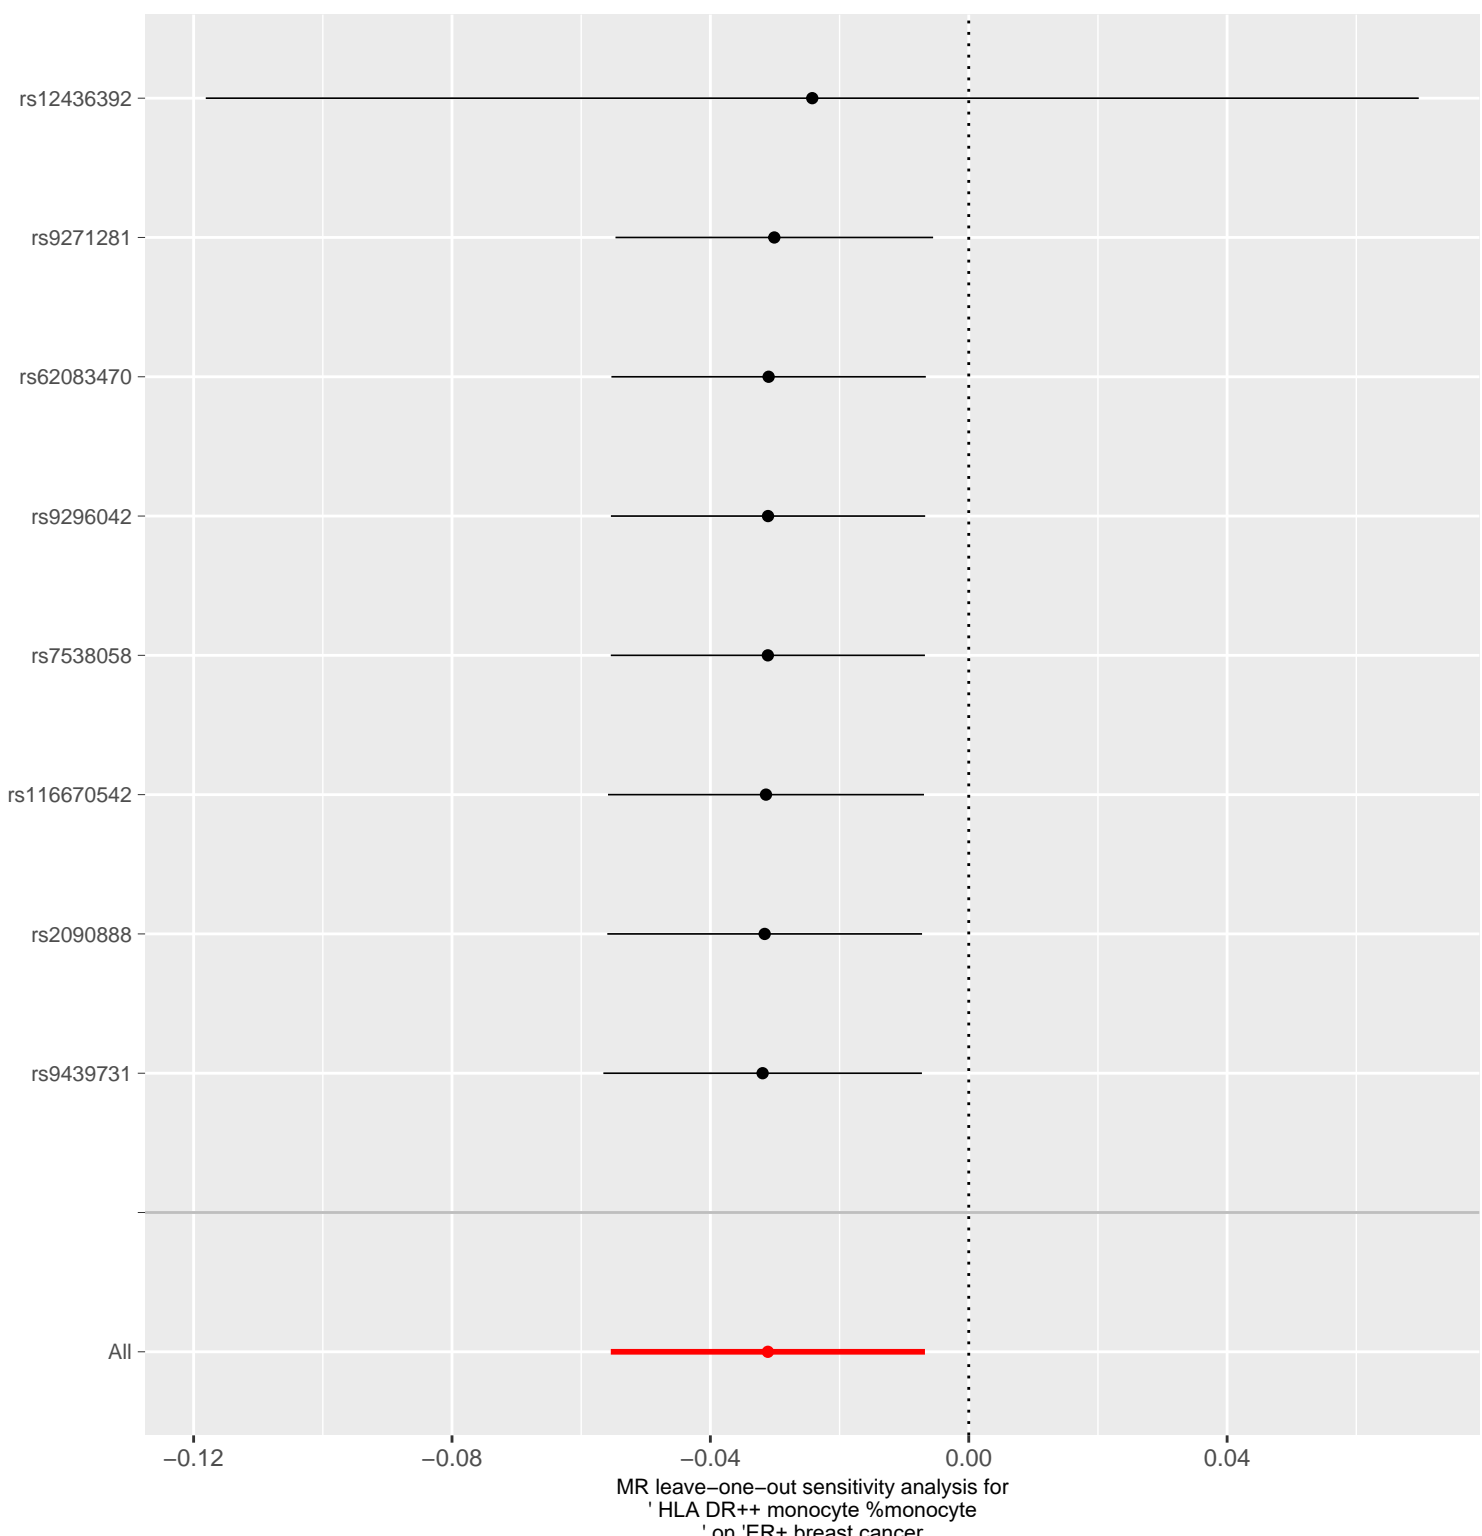



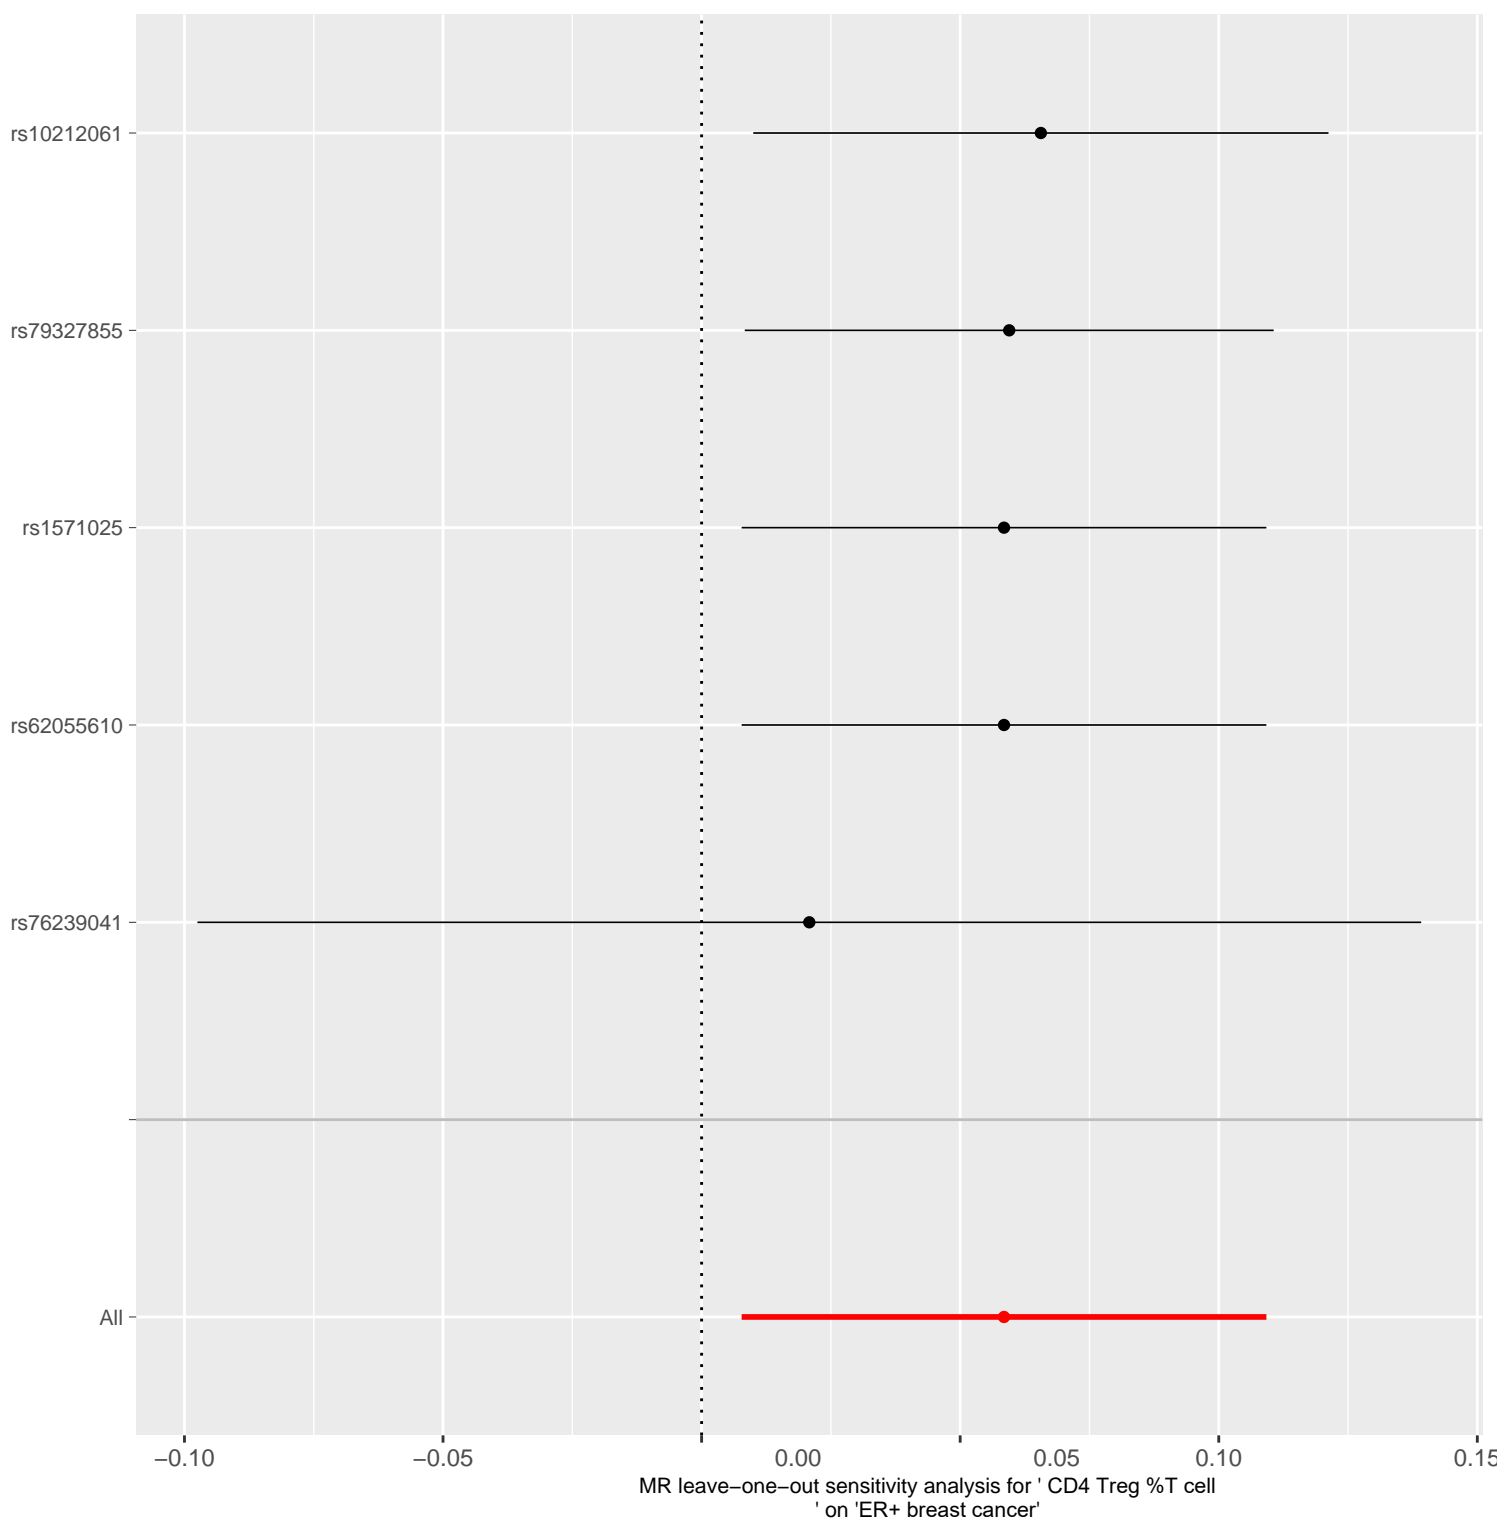

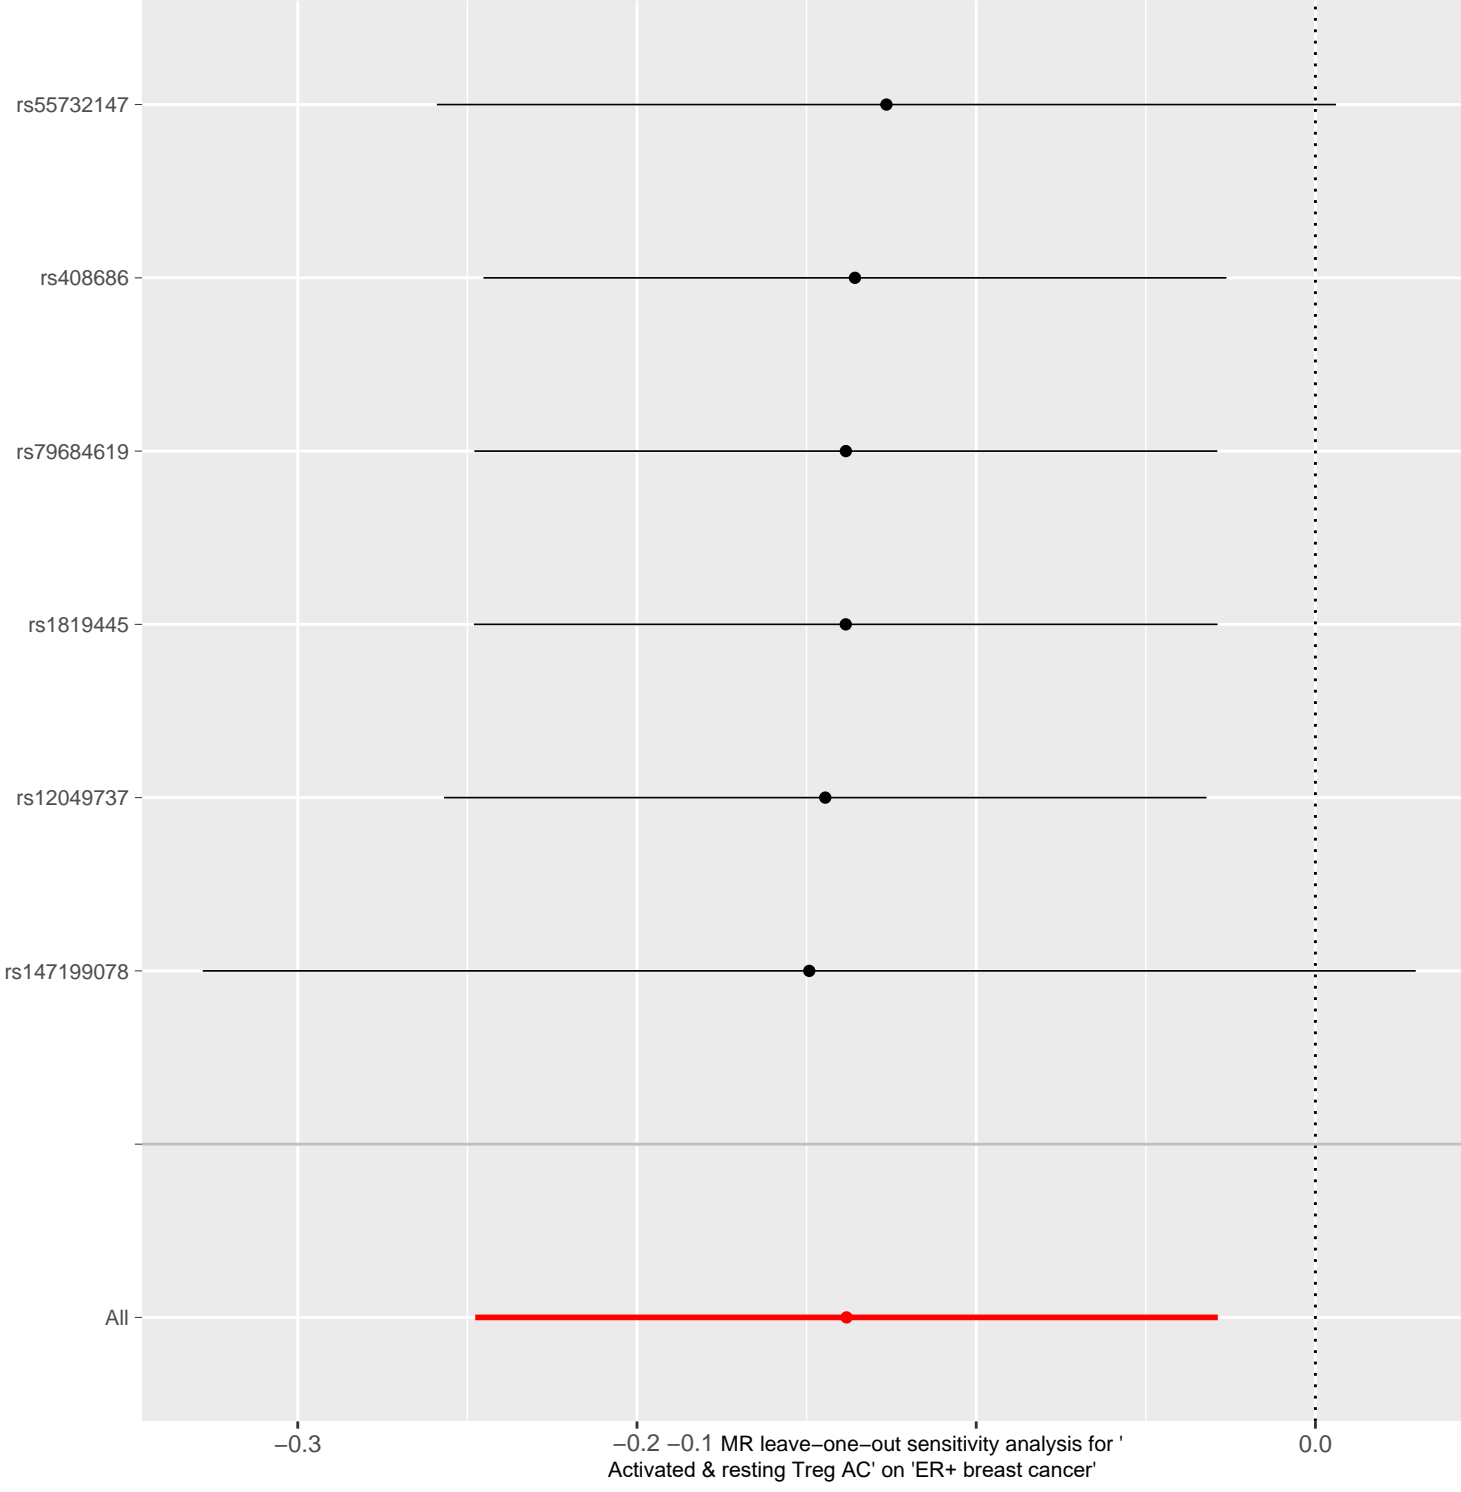

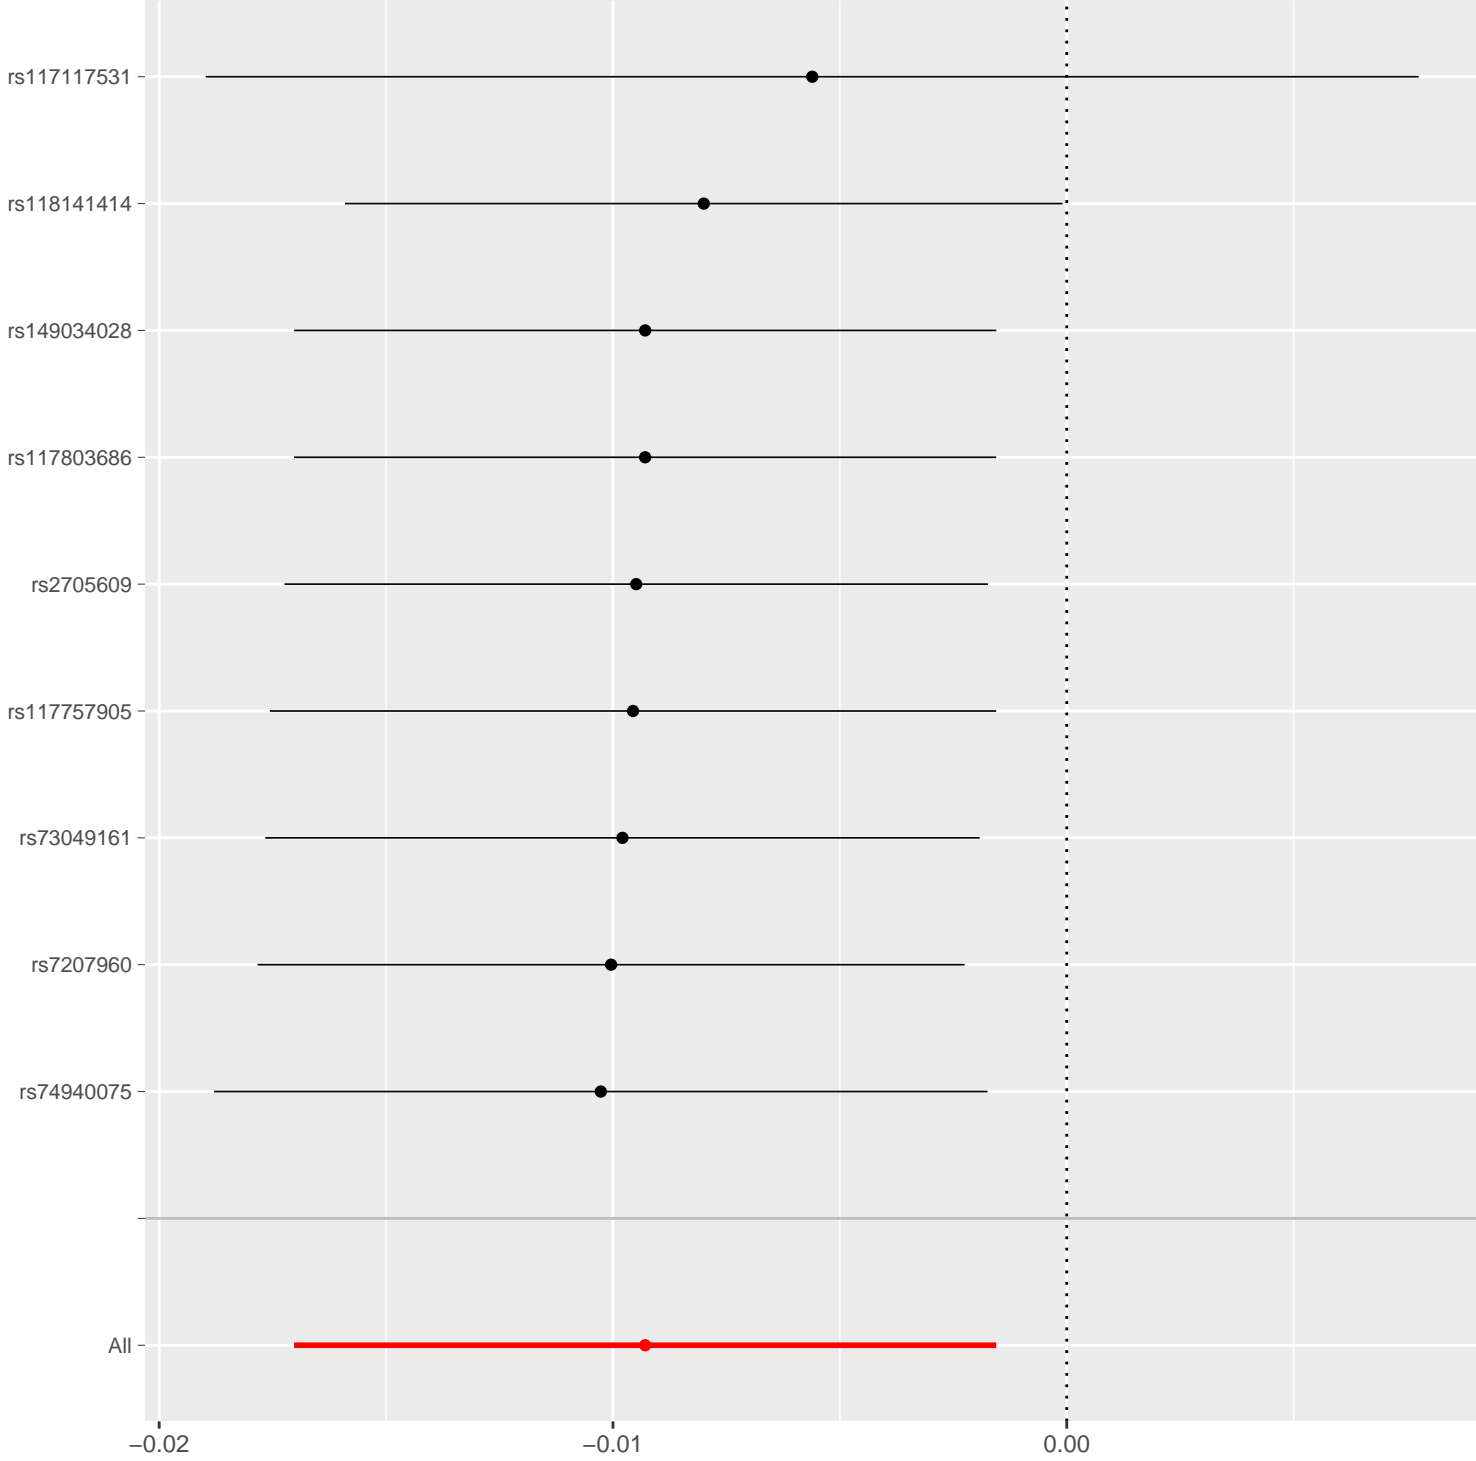

MR leave-one-out sensitivity analysis for 'CD33- HLA DR+ AC' on 'ER+ breast cancer'

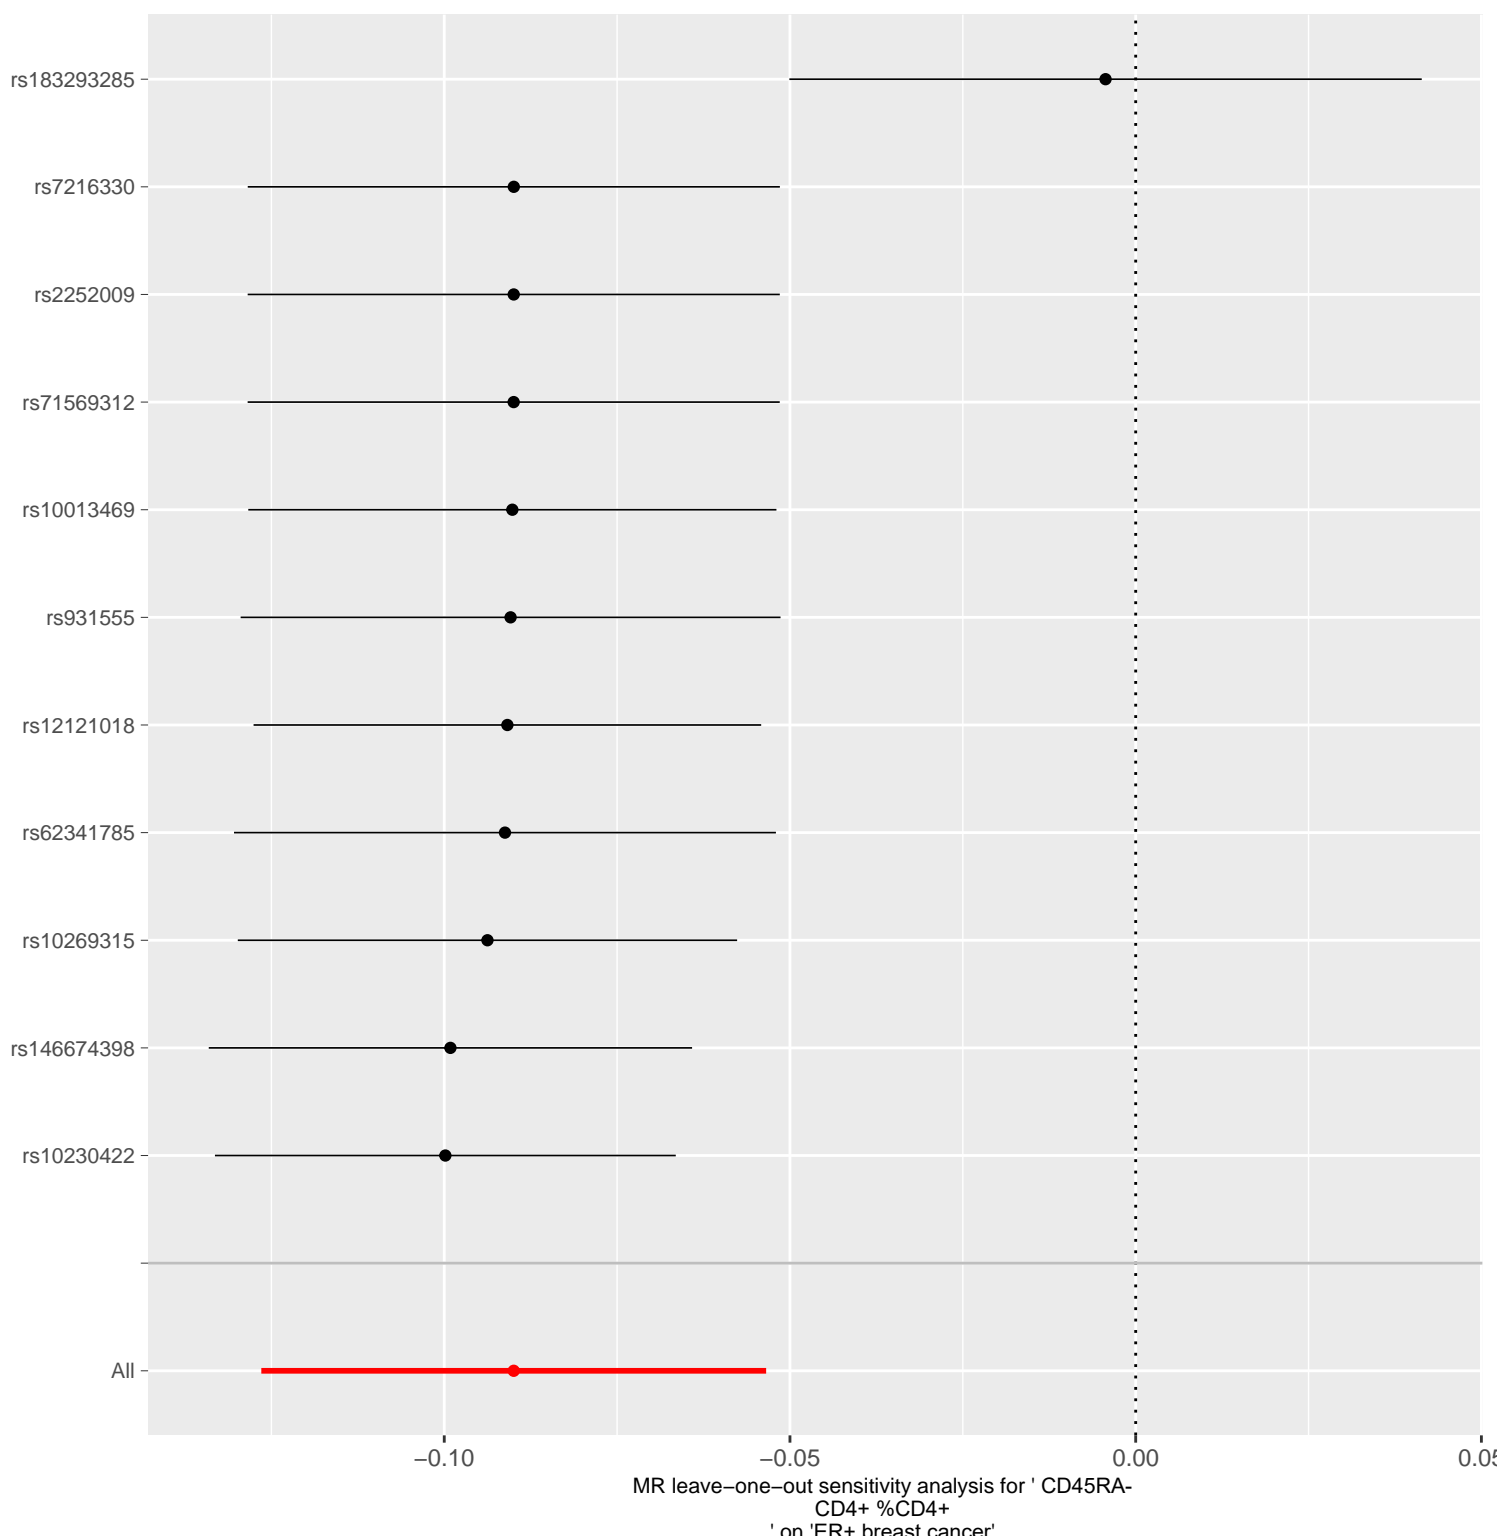

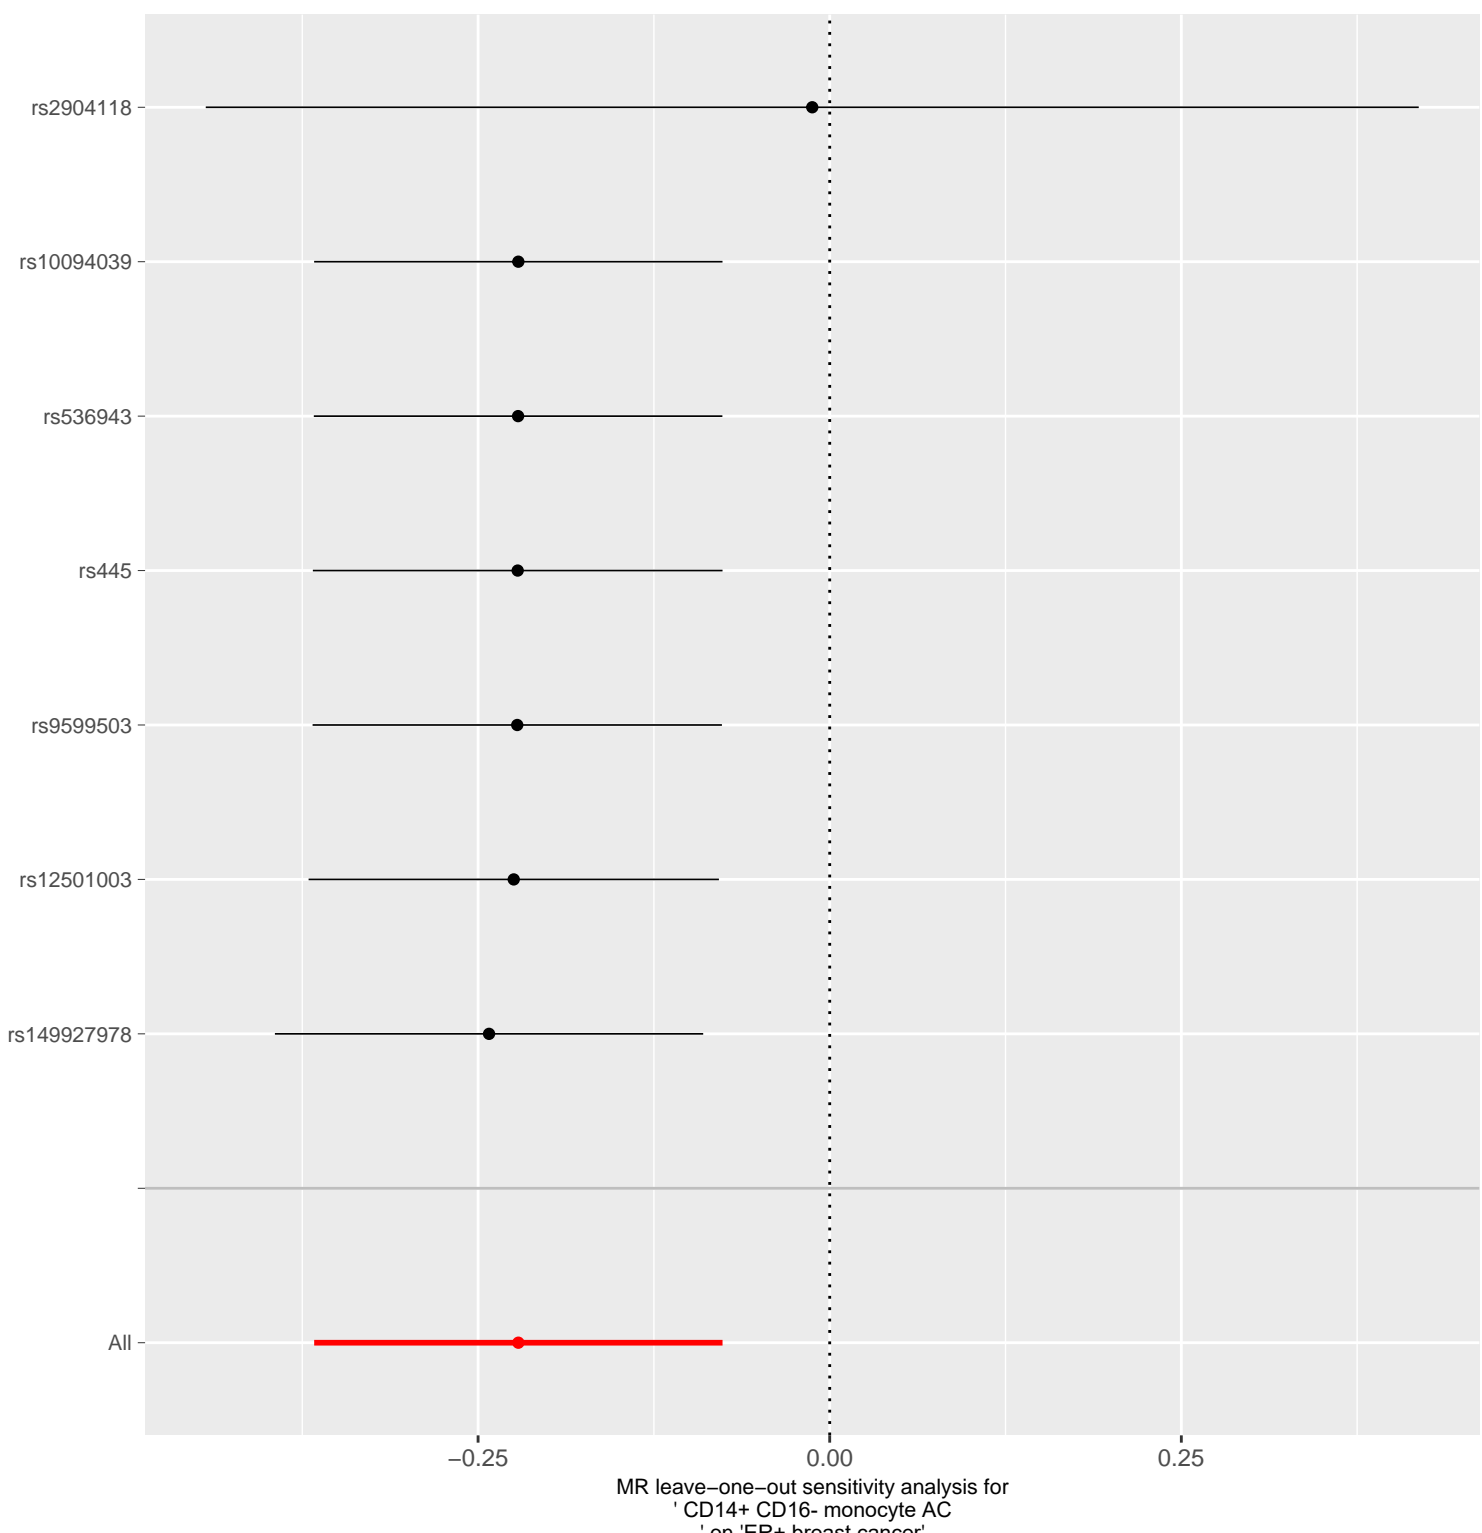

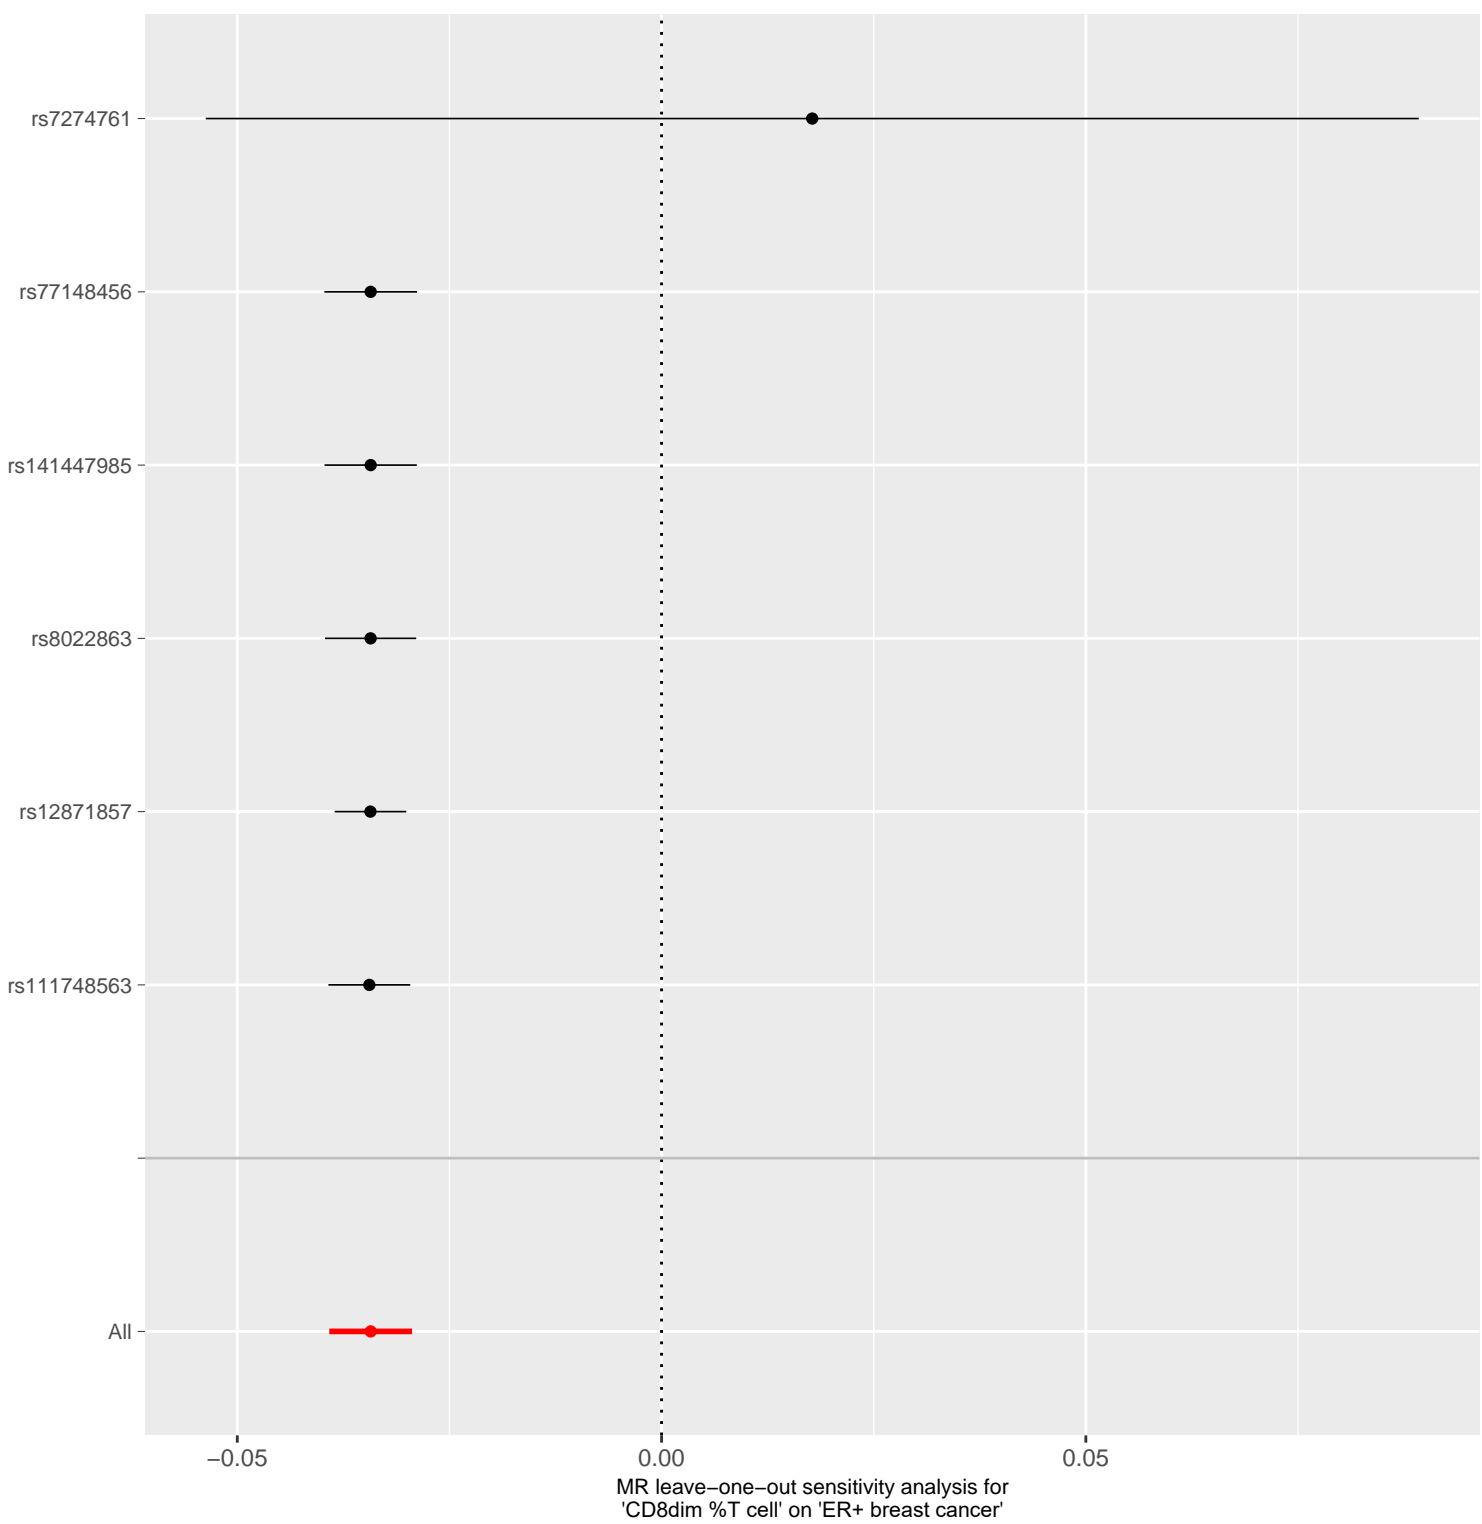

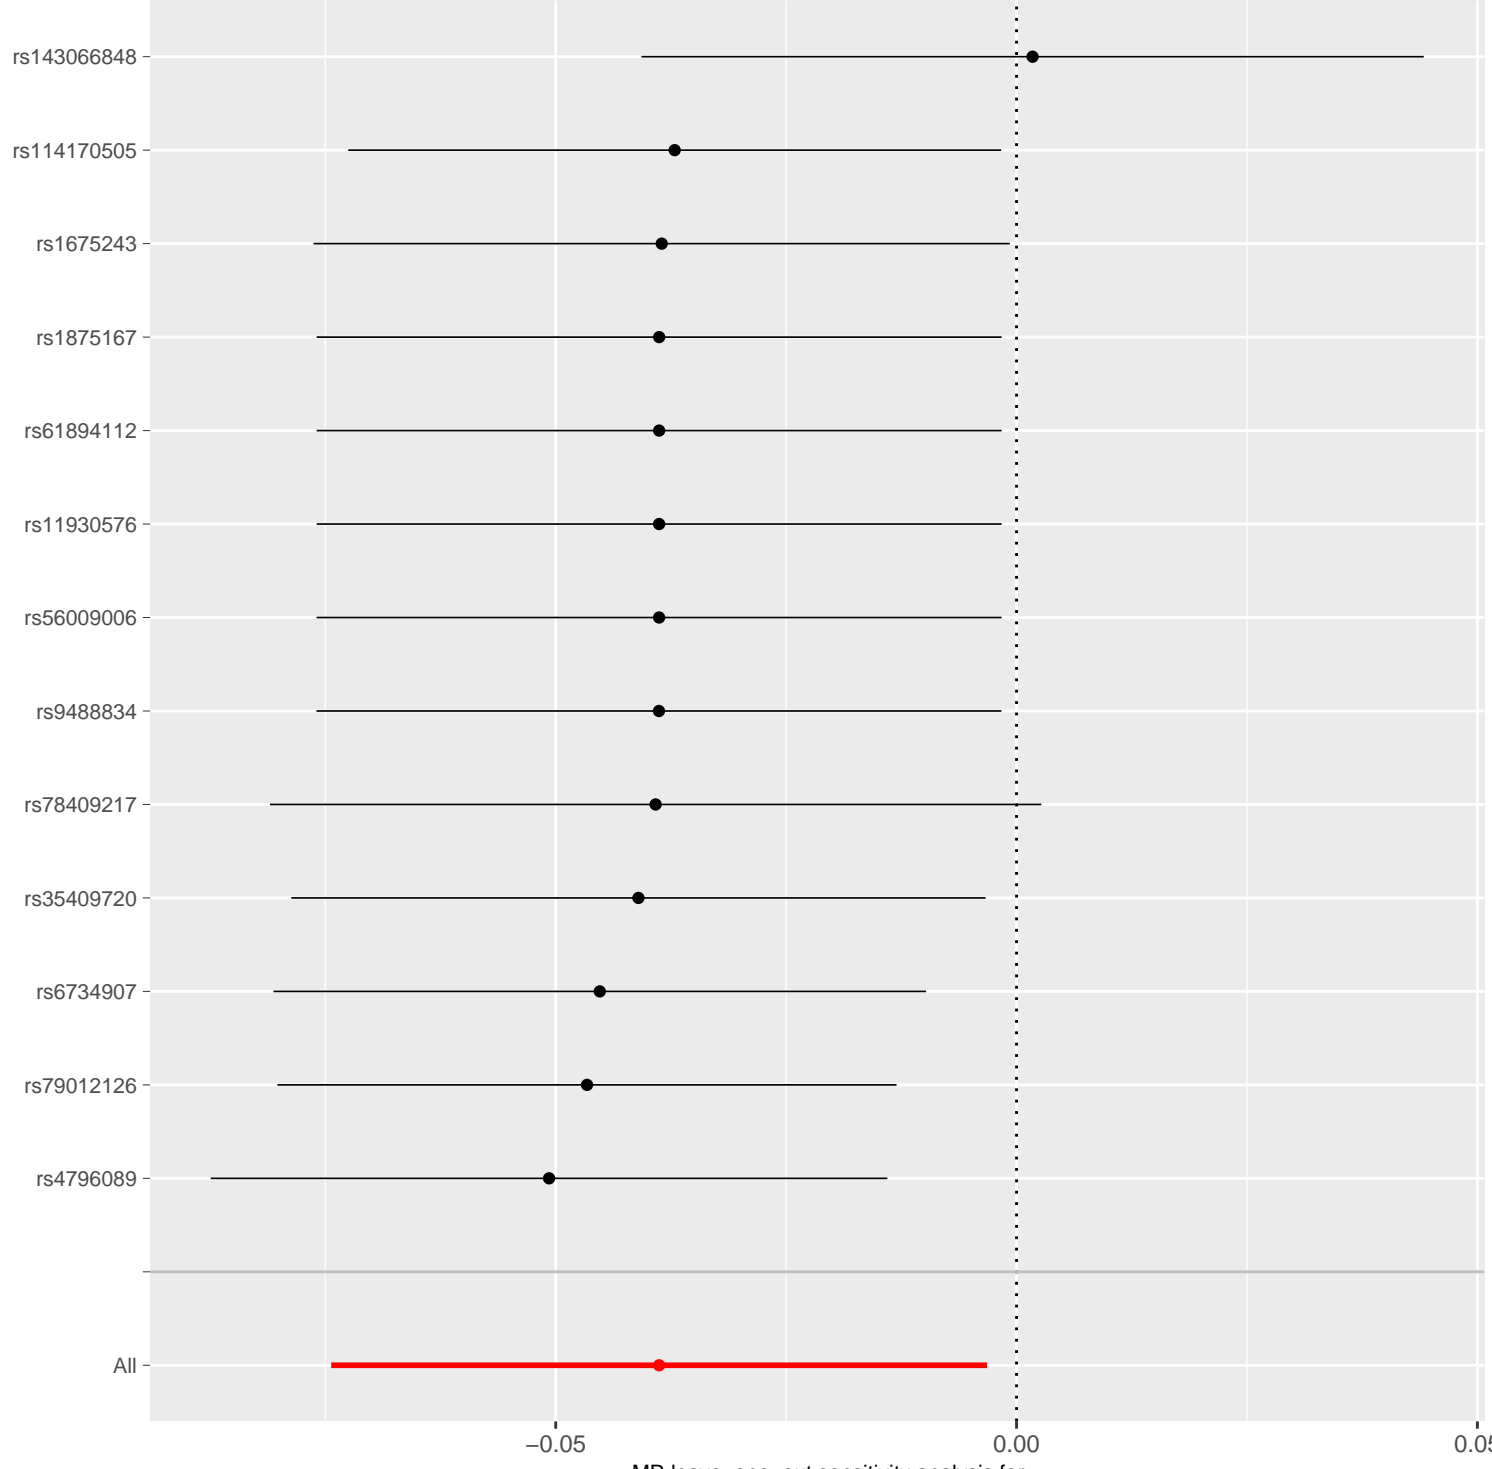

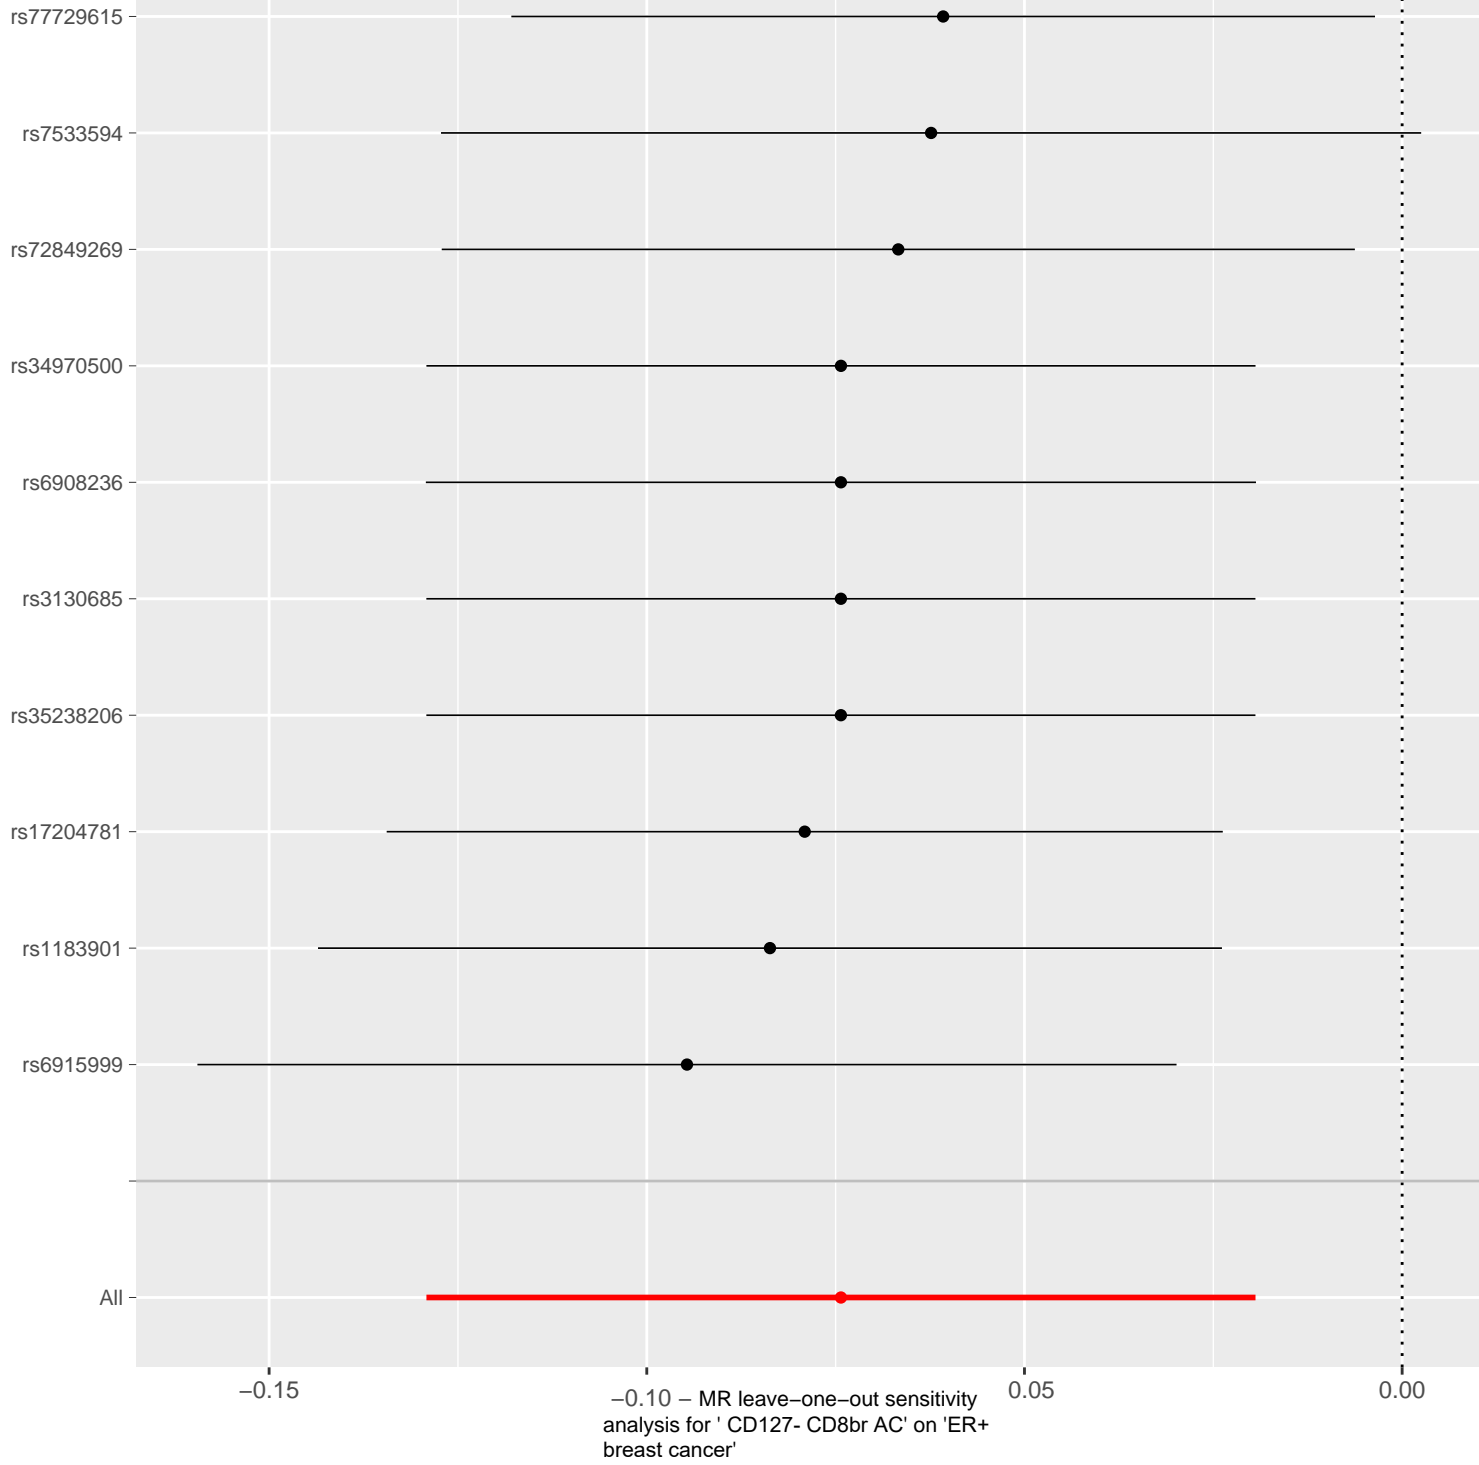



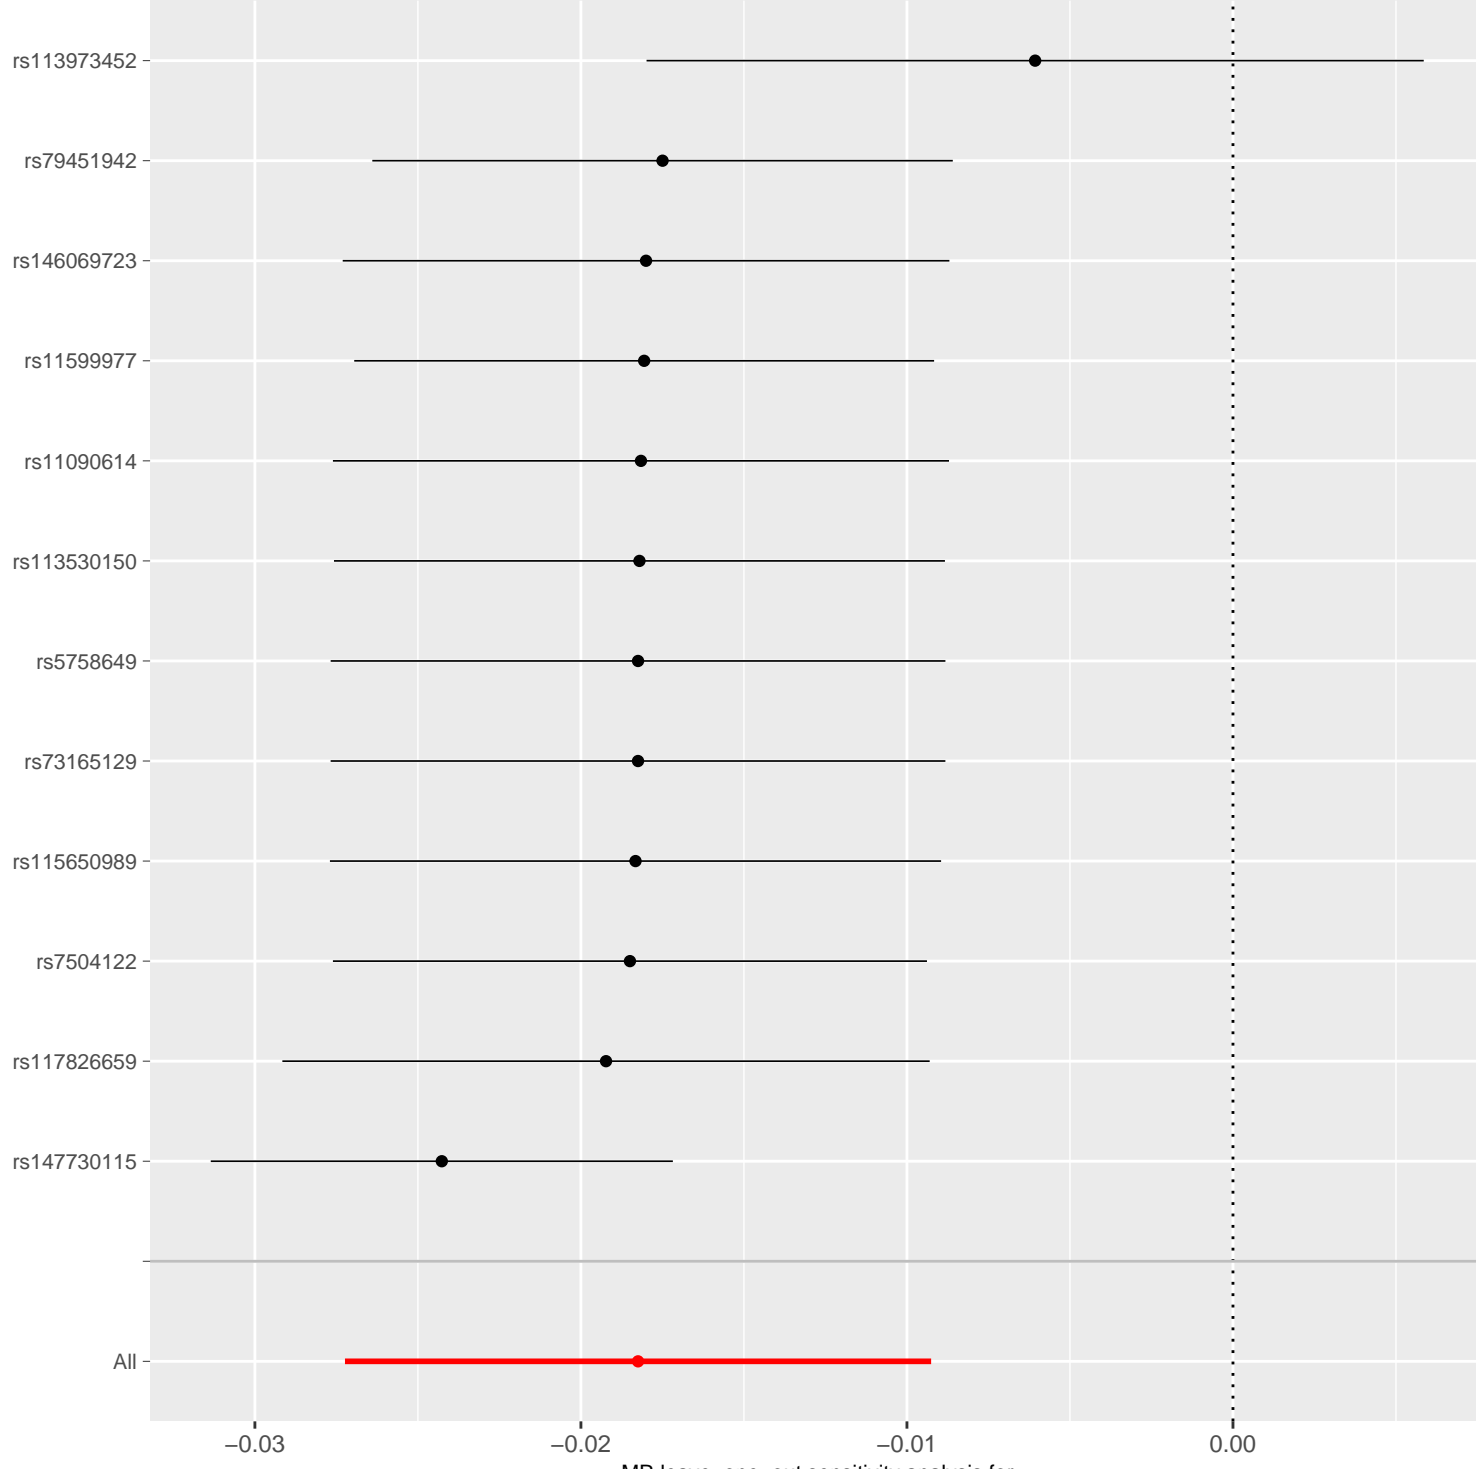

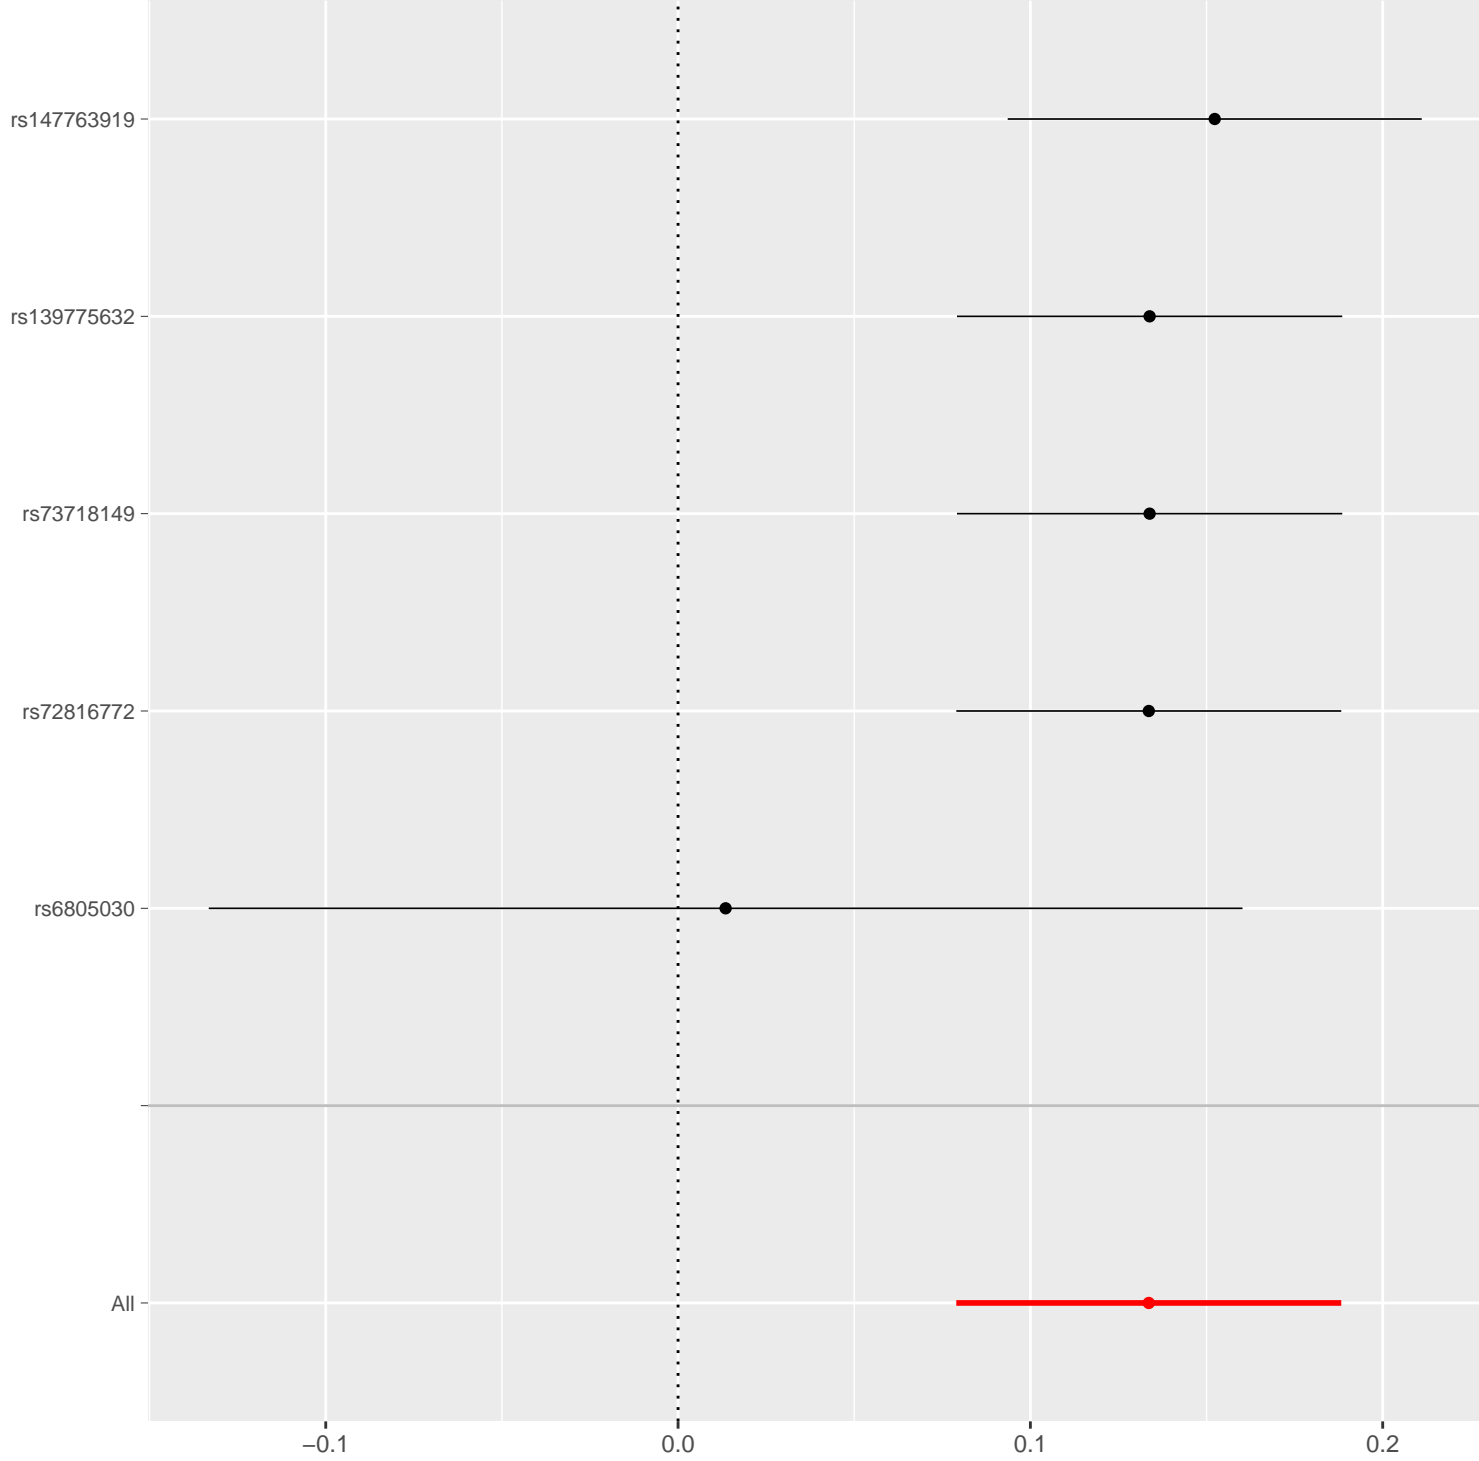

MR leave-one-out sensitivity analysis for

'CD19 on IgD- CD38br

on 'ER+ breast cancer'

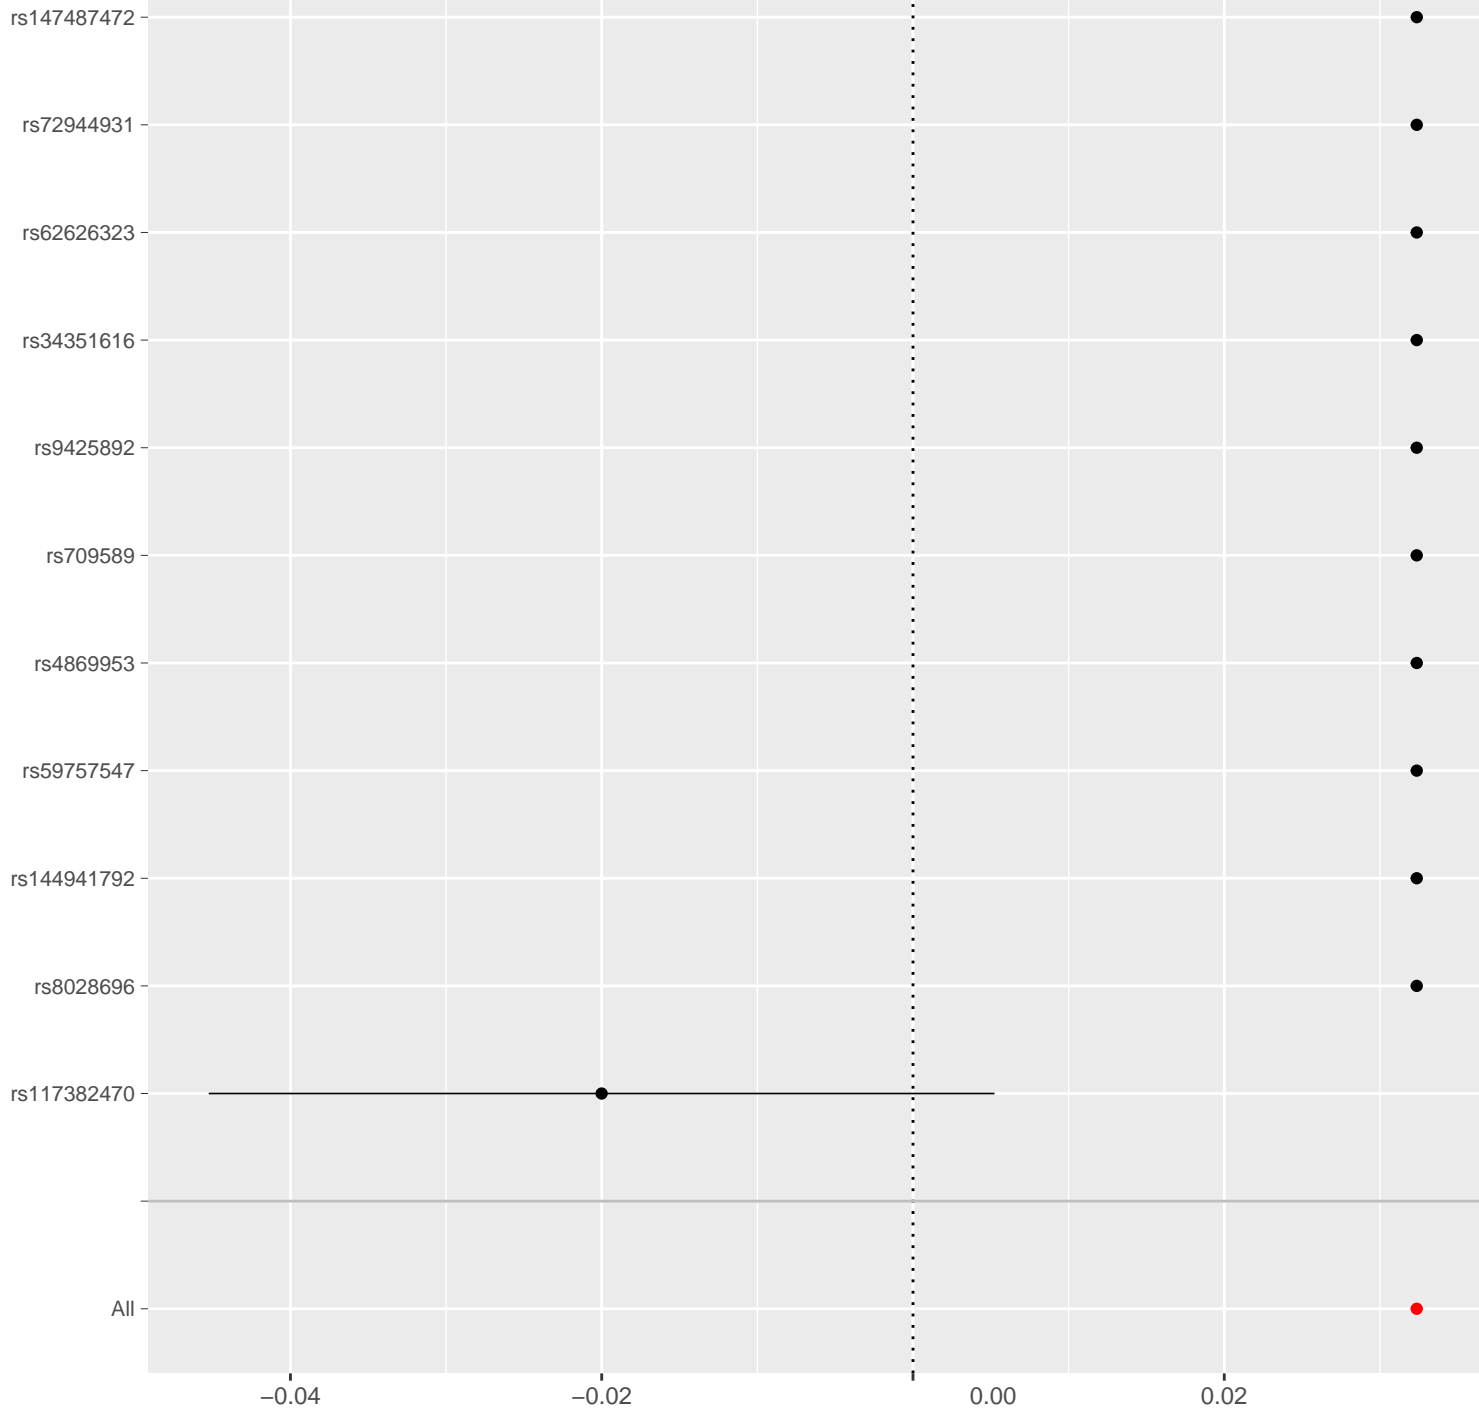

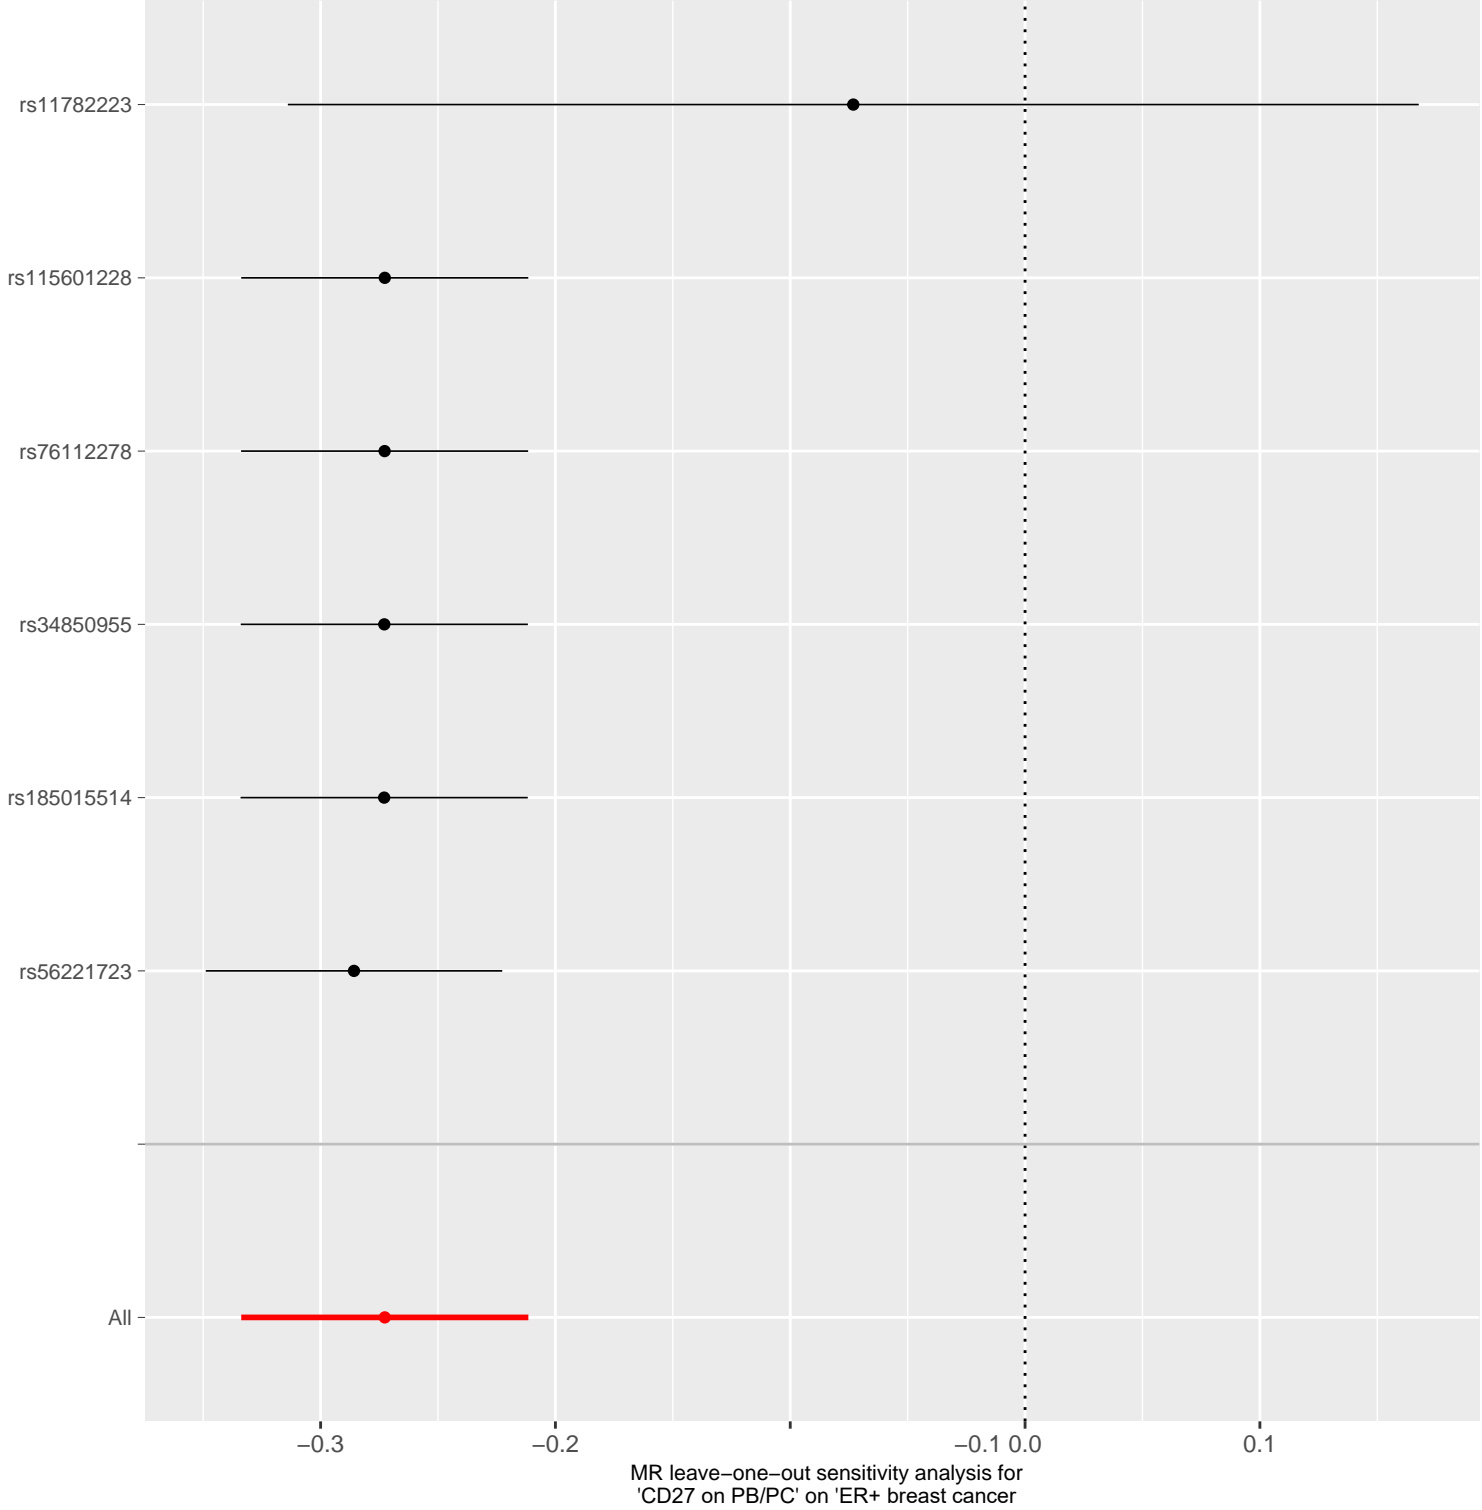

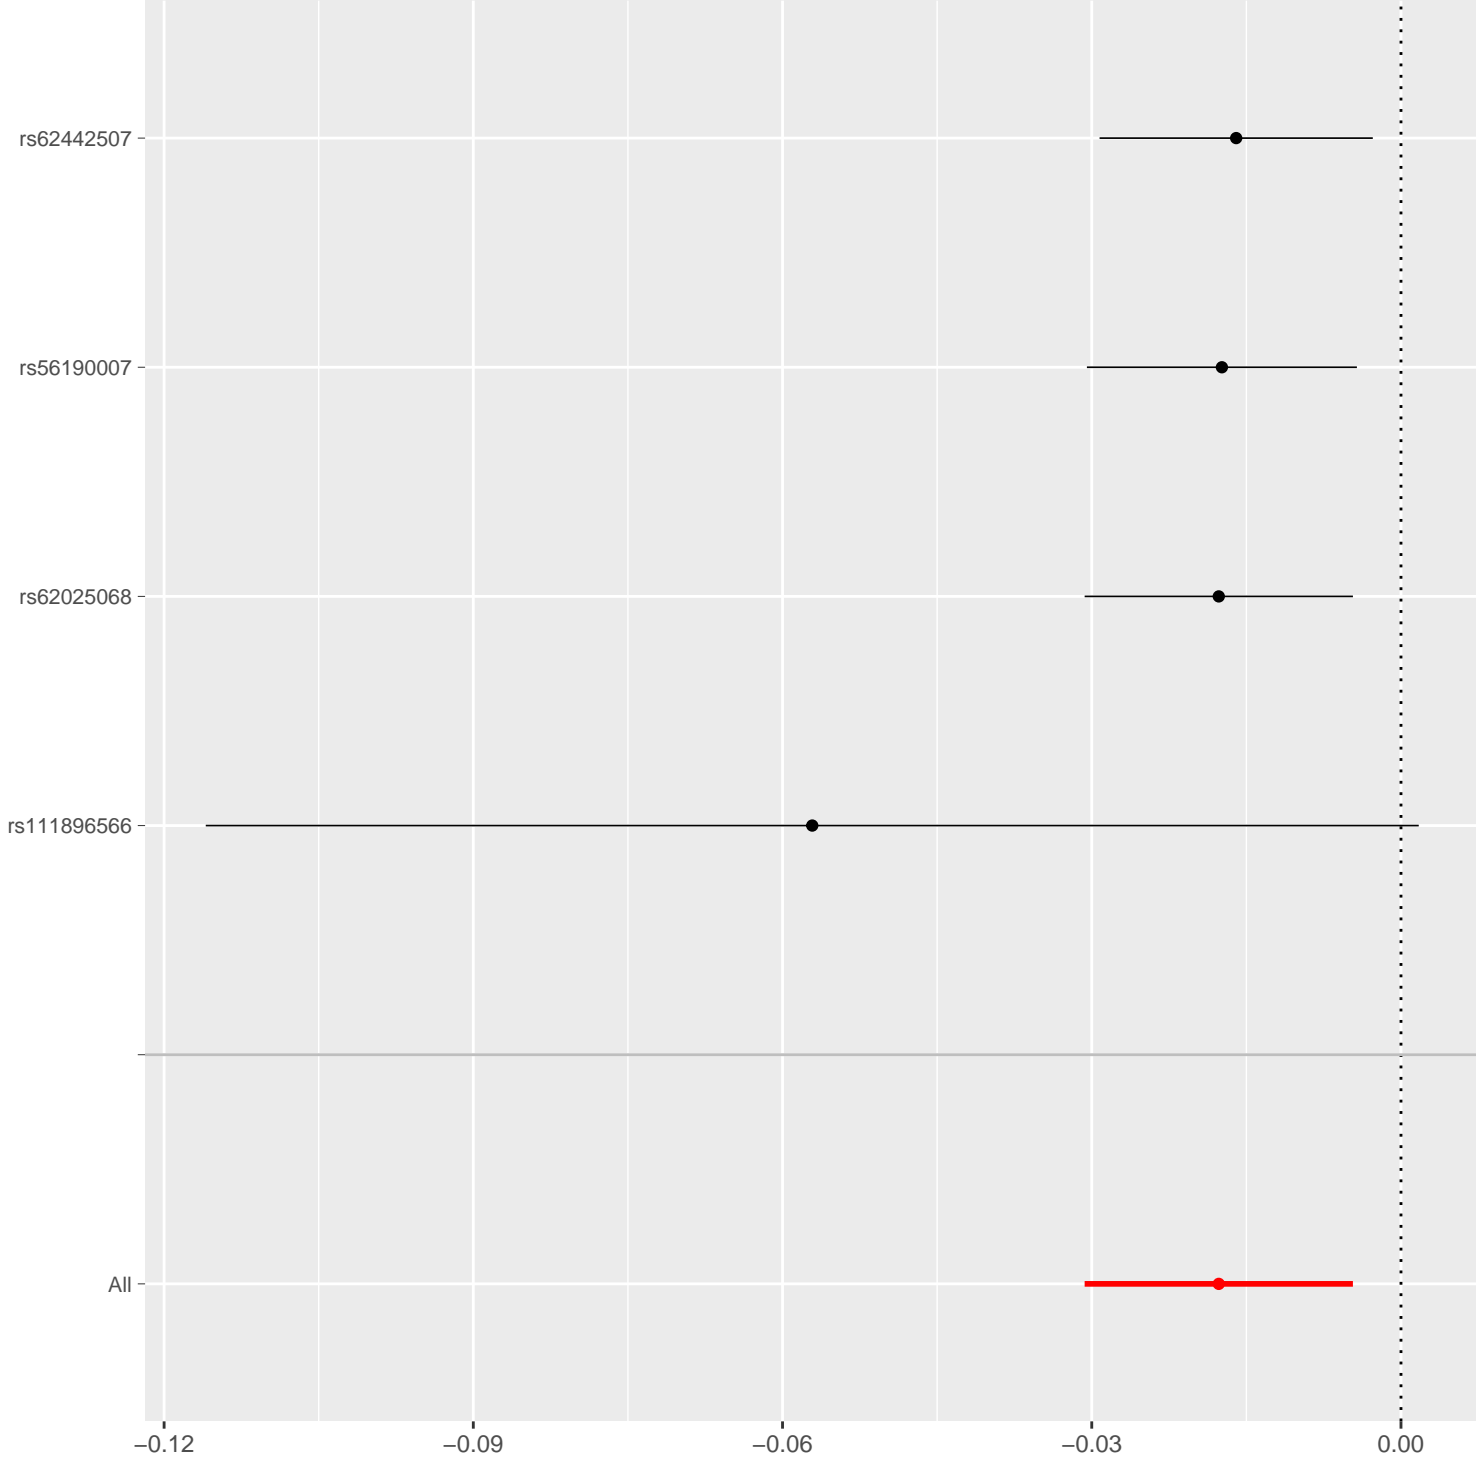

MR leave-one-out sensitivity analysis for 'CD66b on Gr MDSC' on 'ER+ breast cancer'

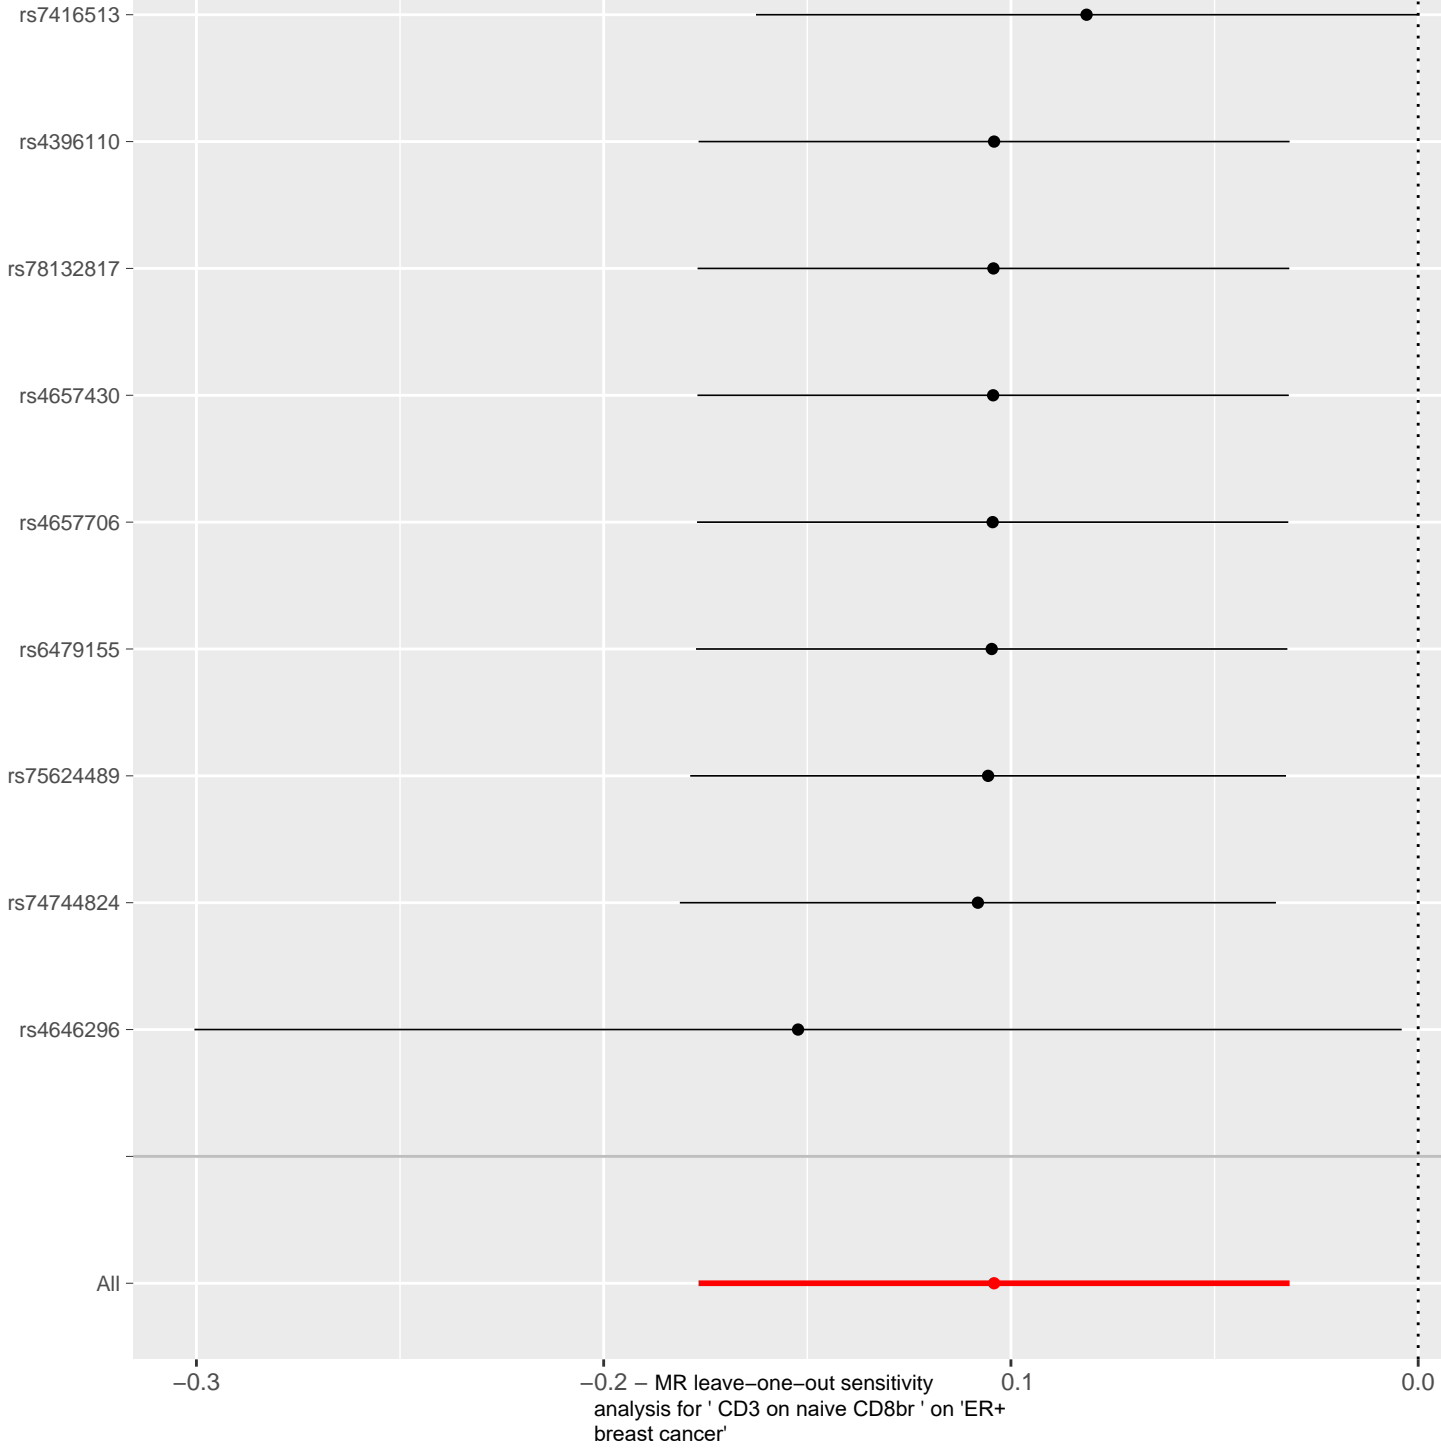

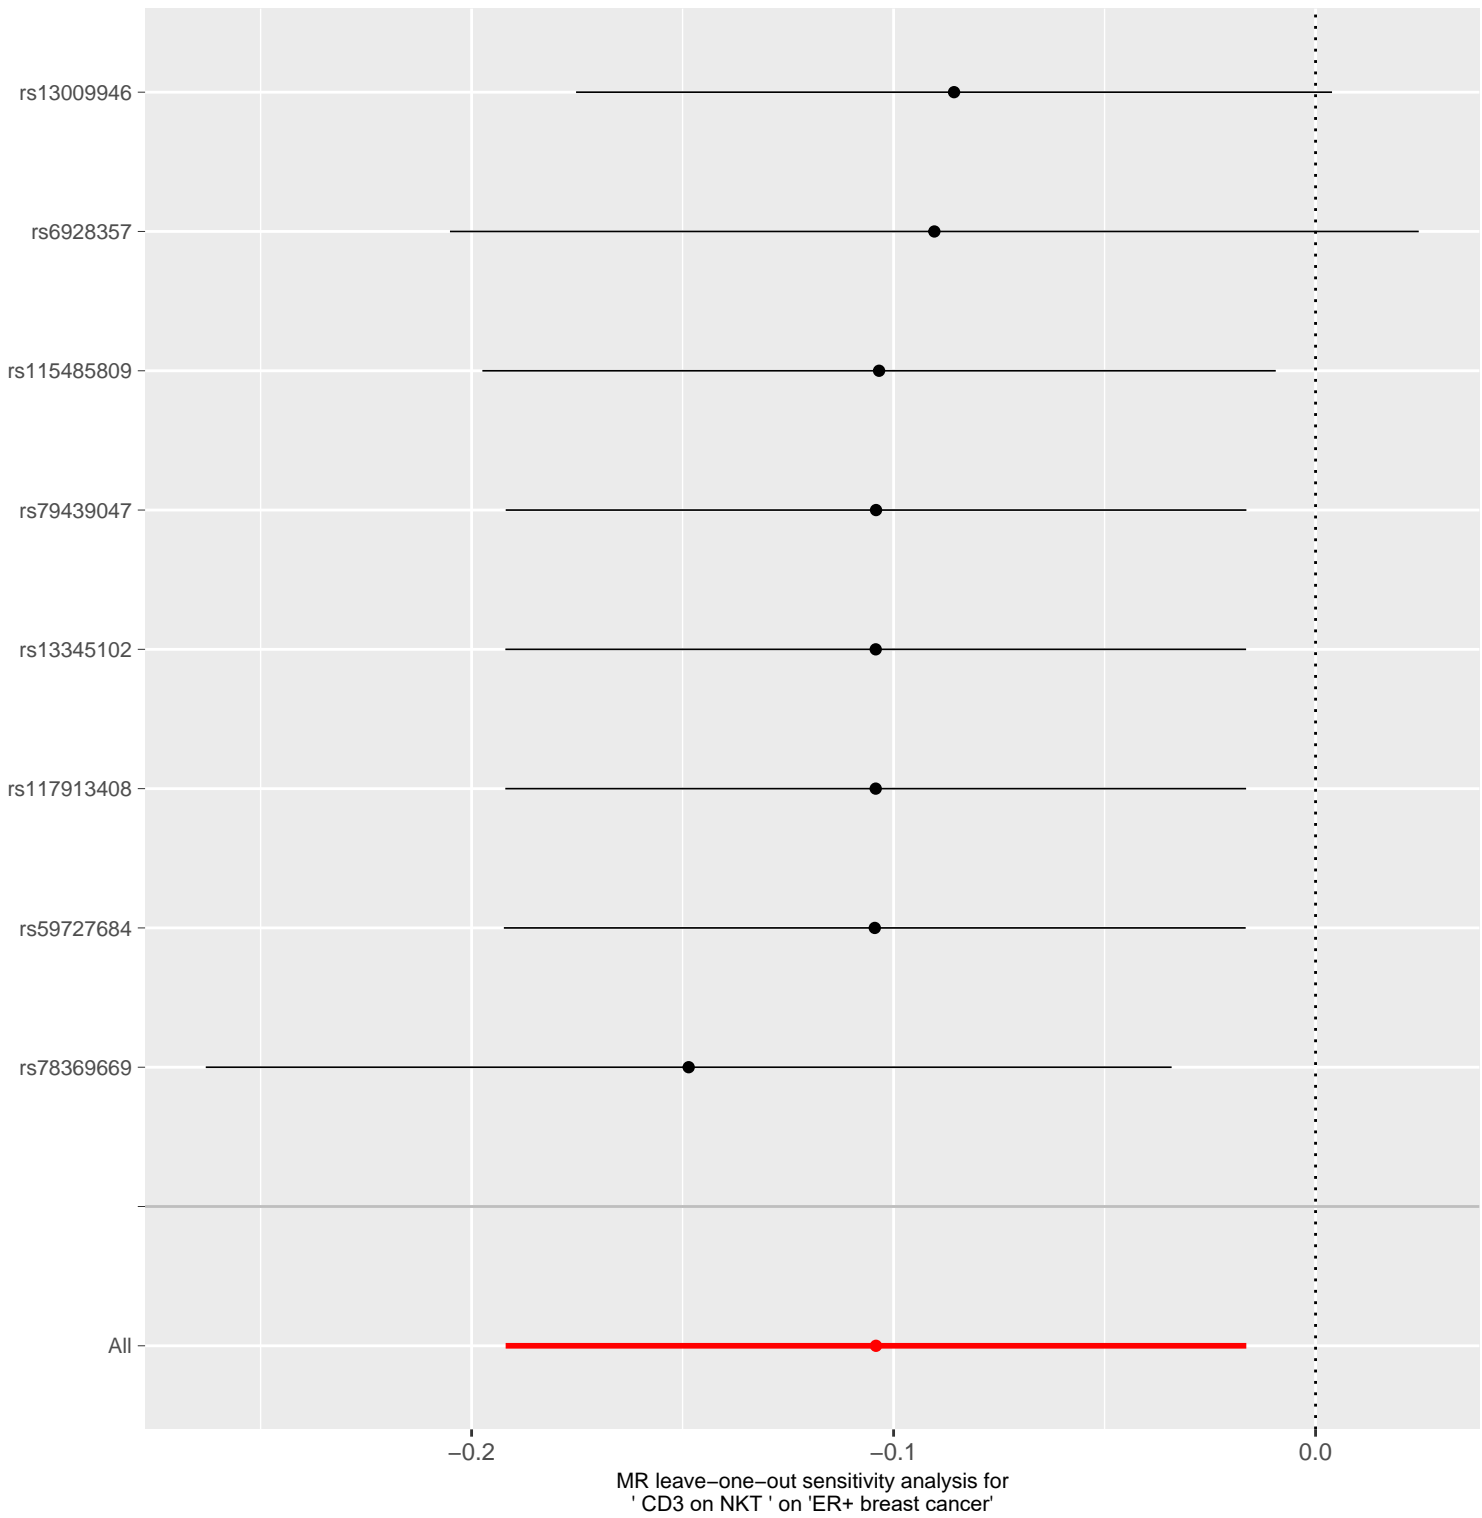

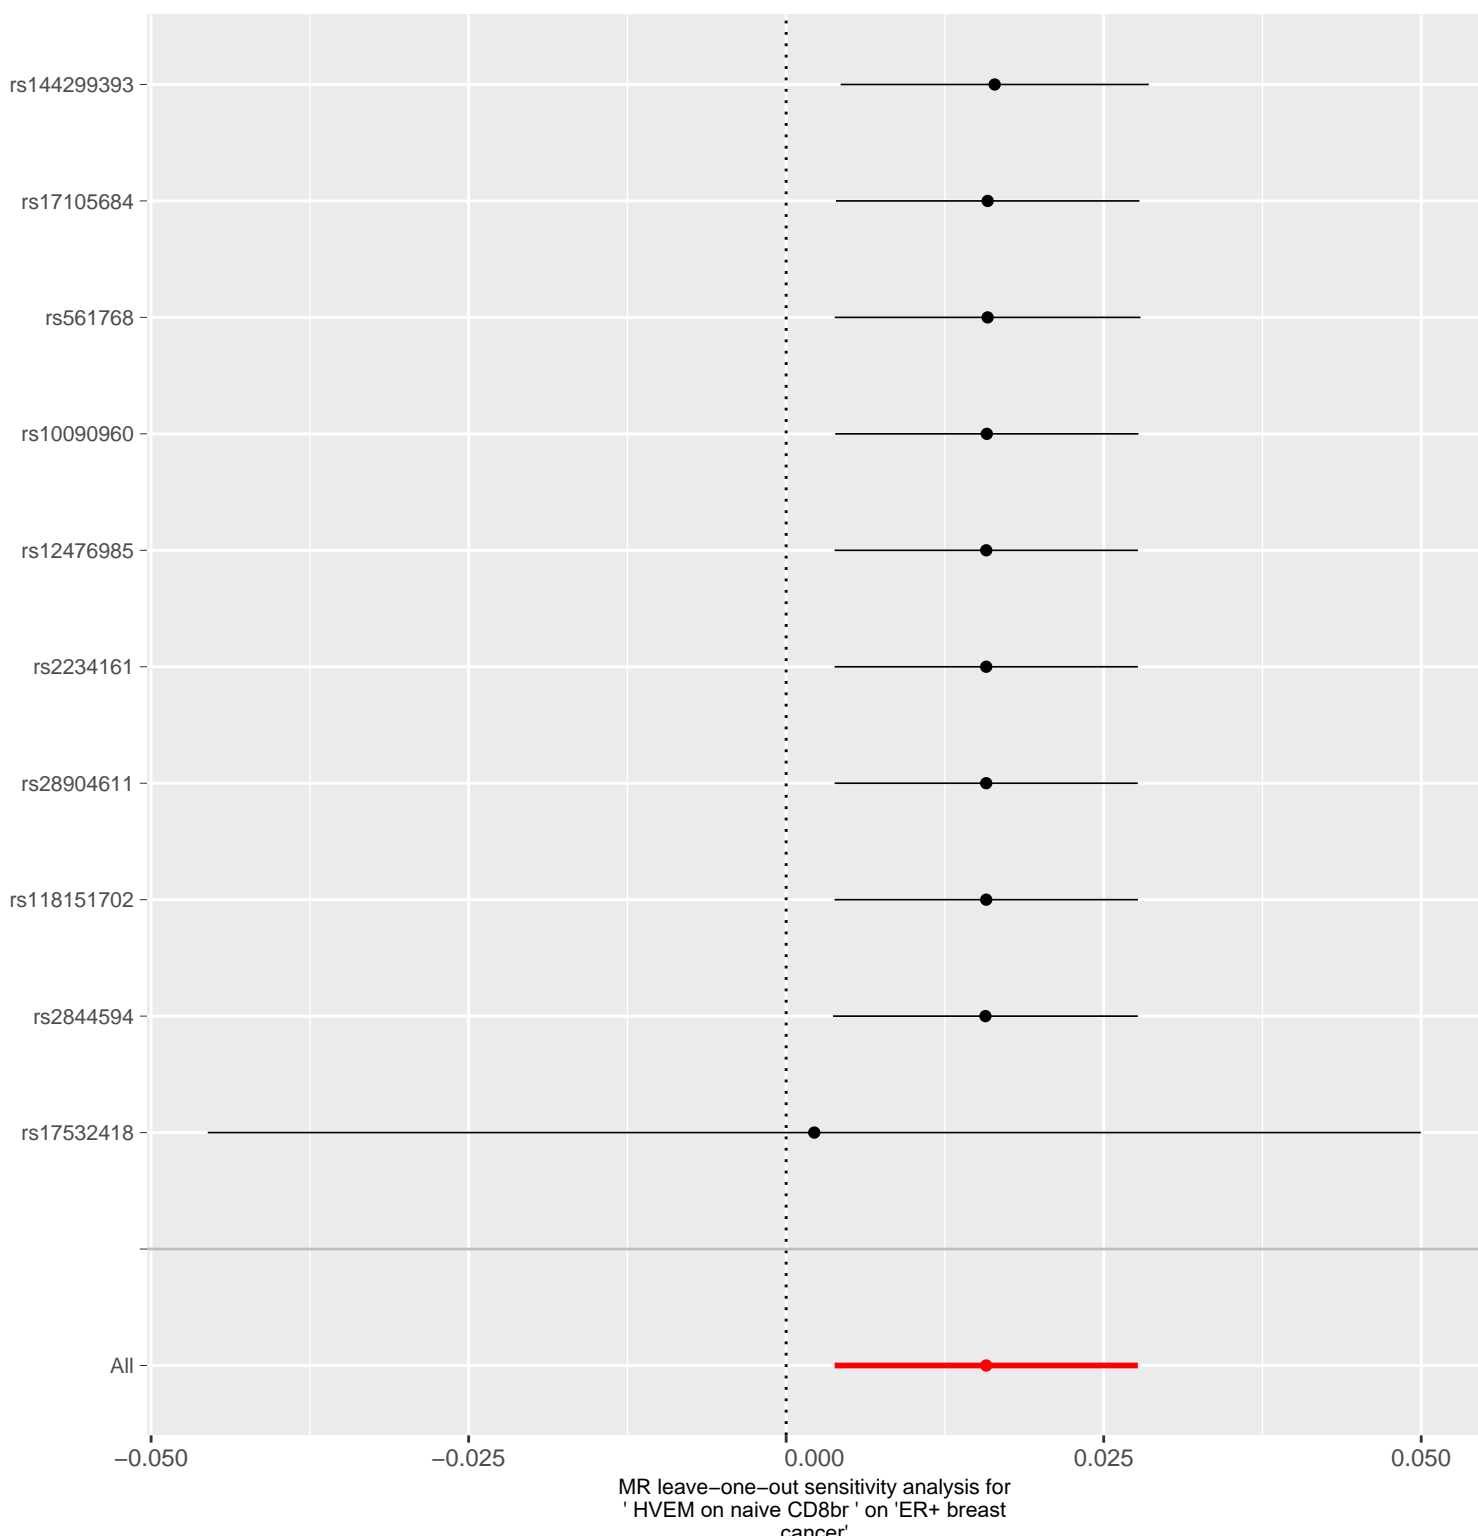



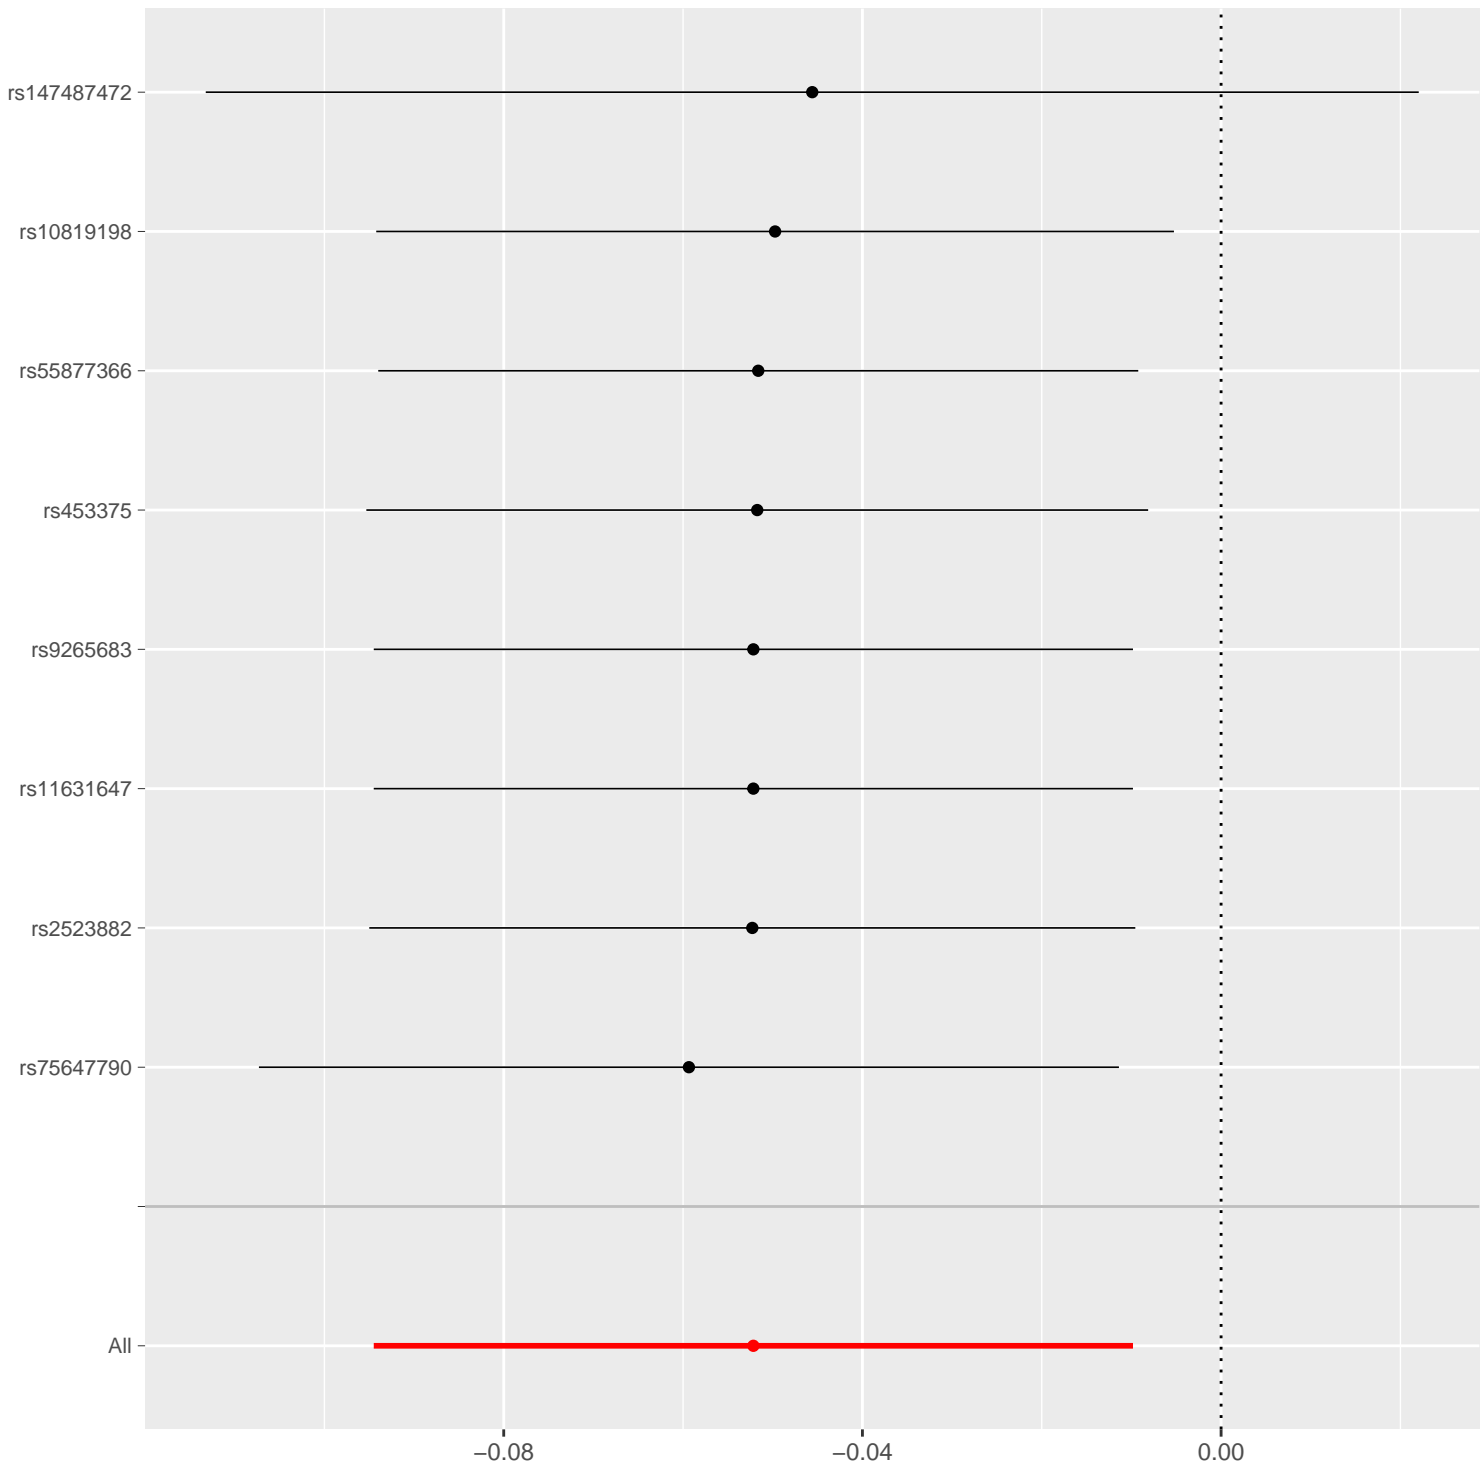

MR leave-one-out sensitivity analysis for 'CD25 on resting Treg' on 'ER+ breast cancer'

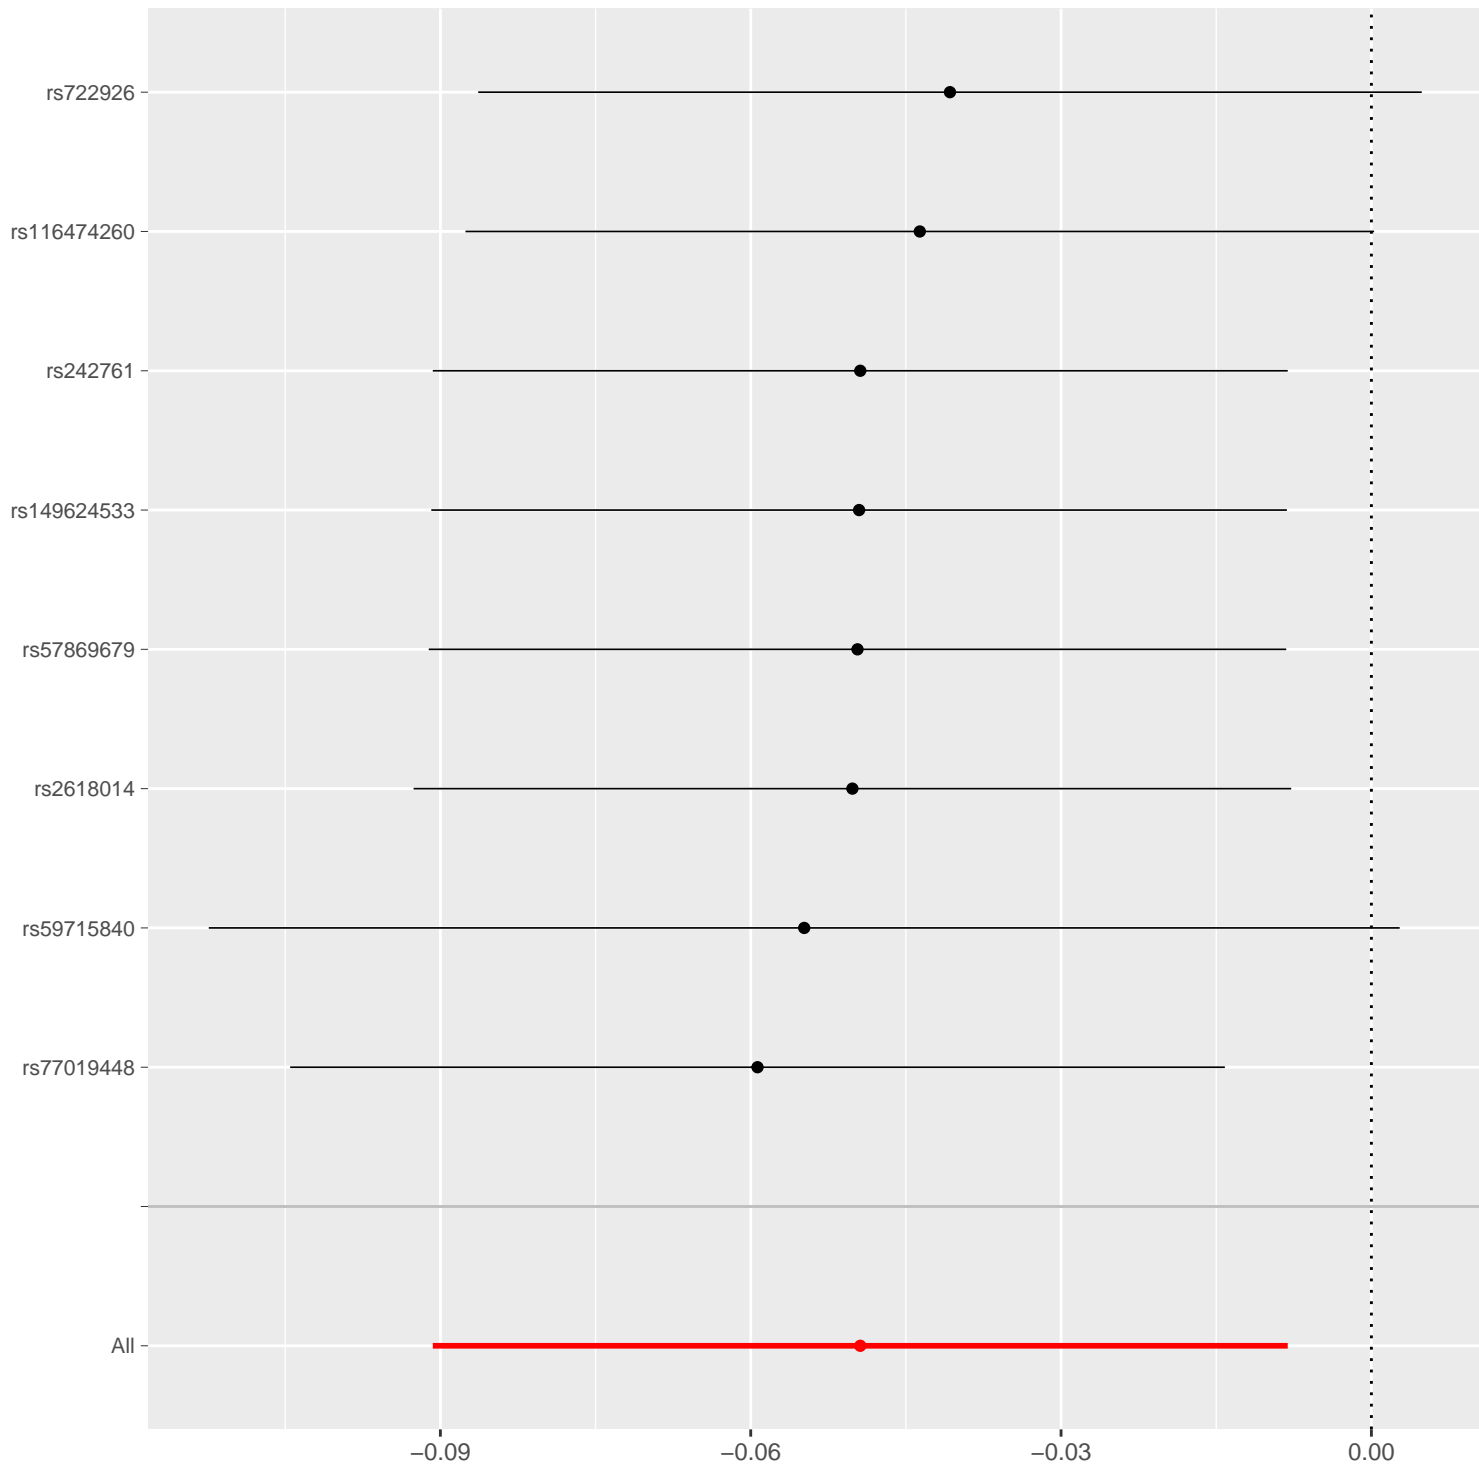

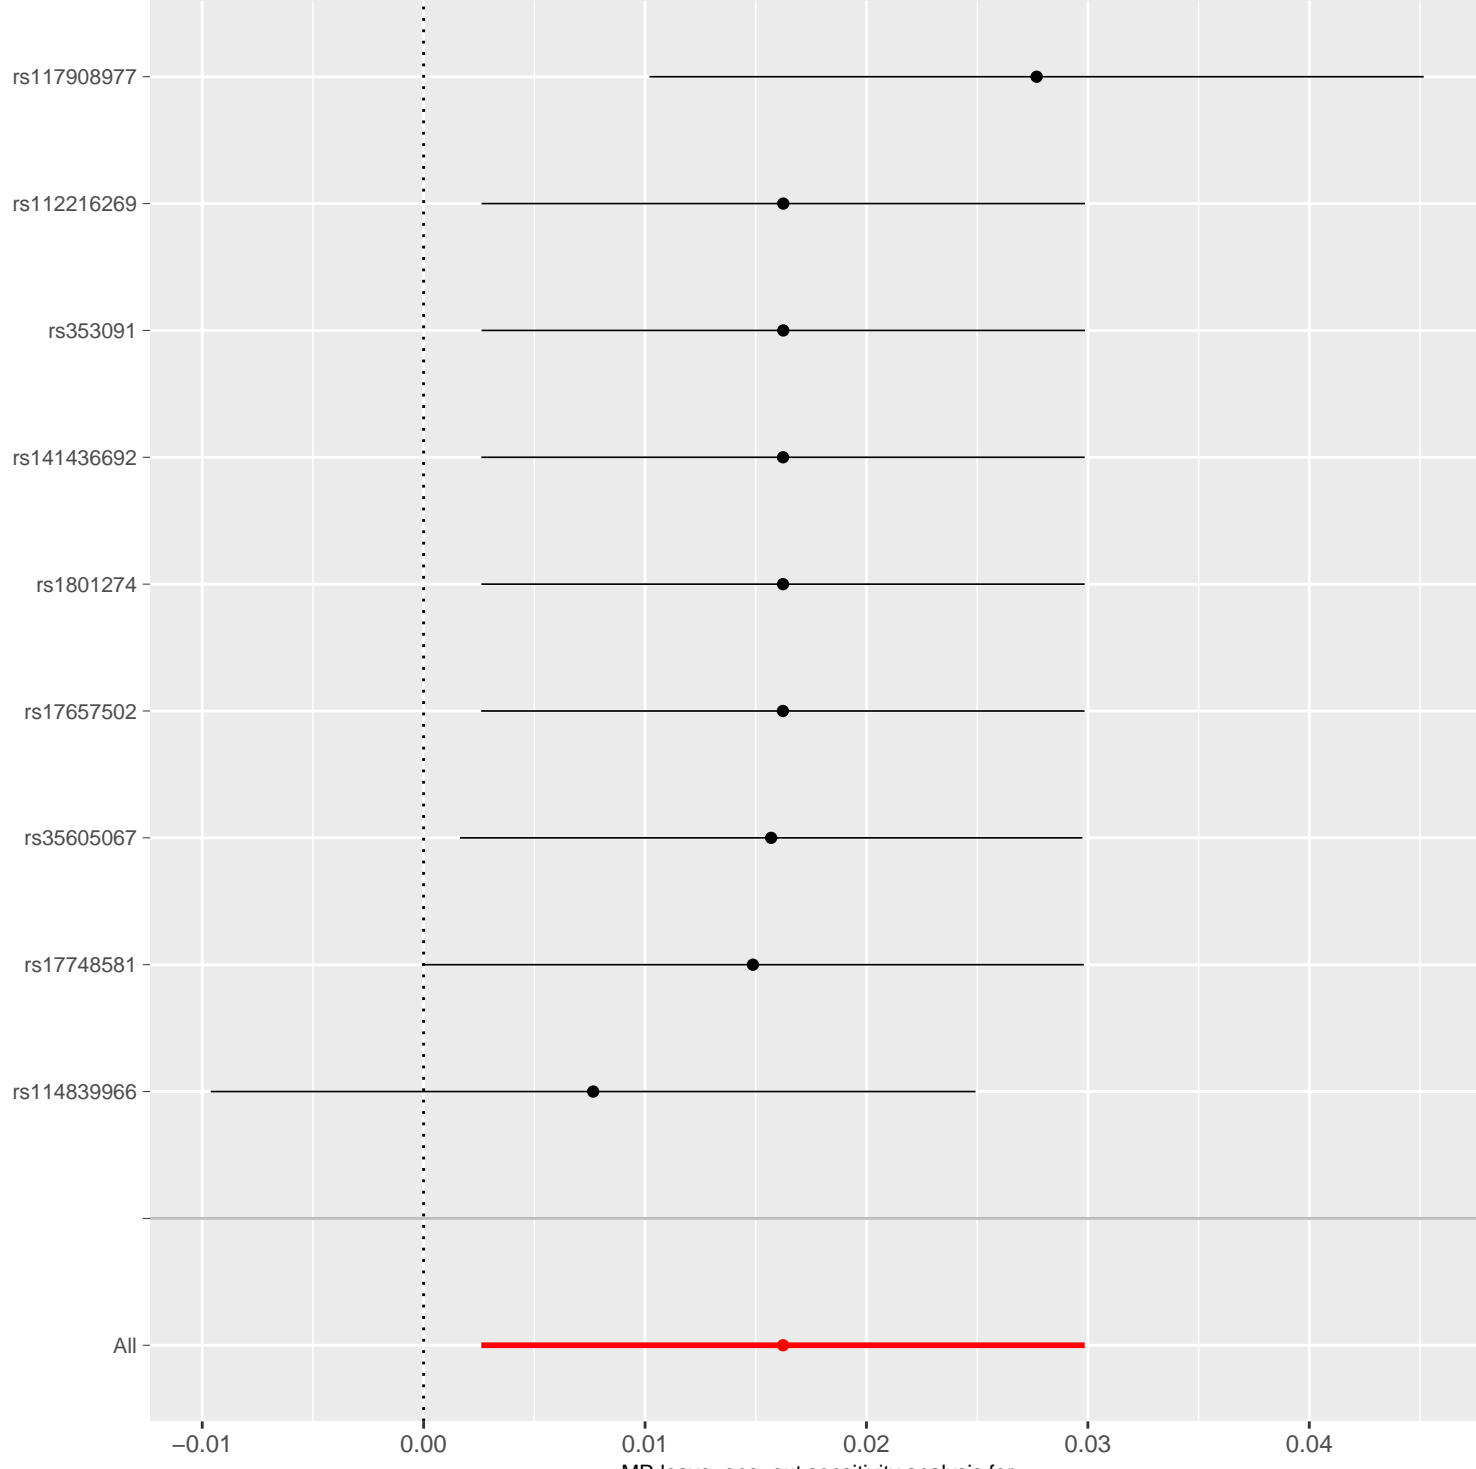

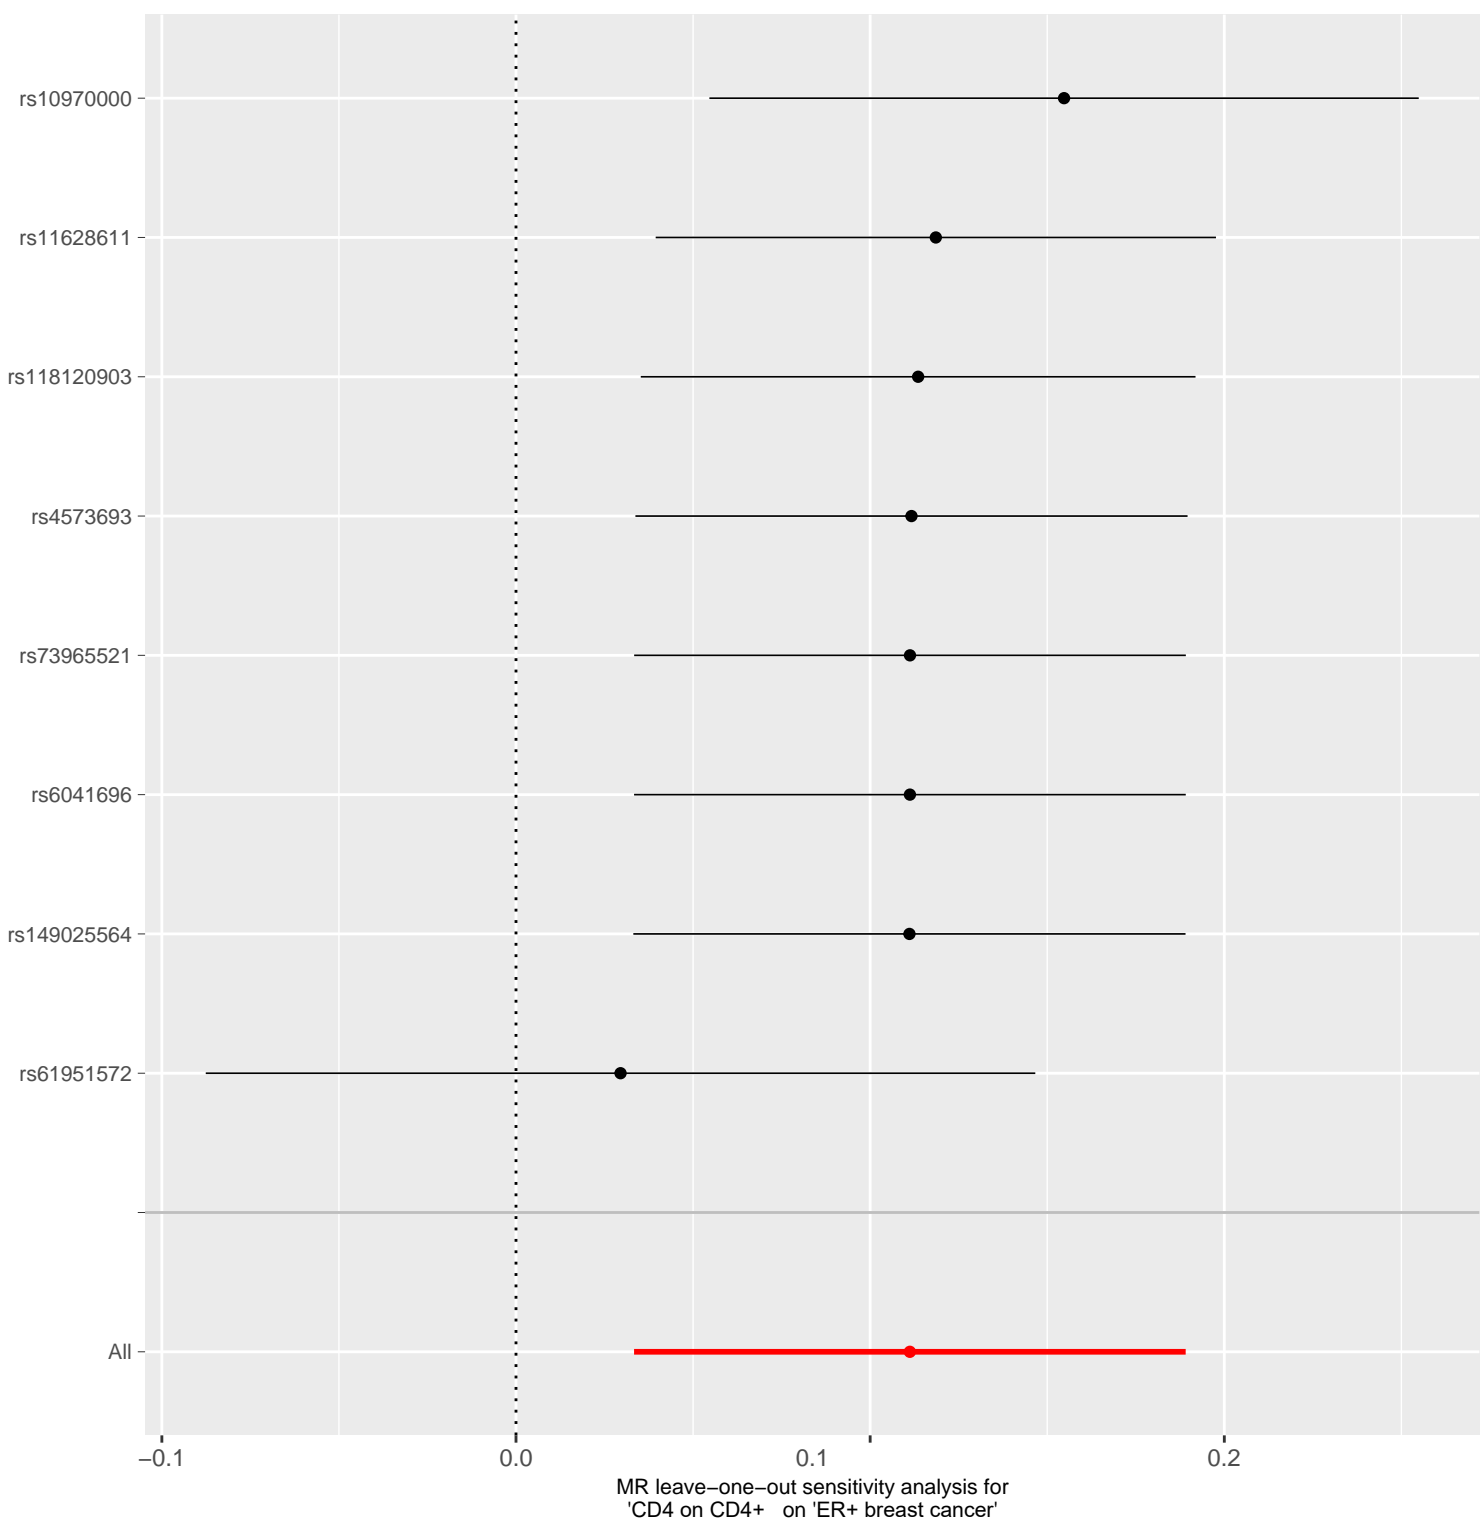

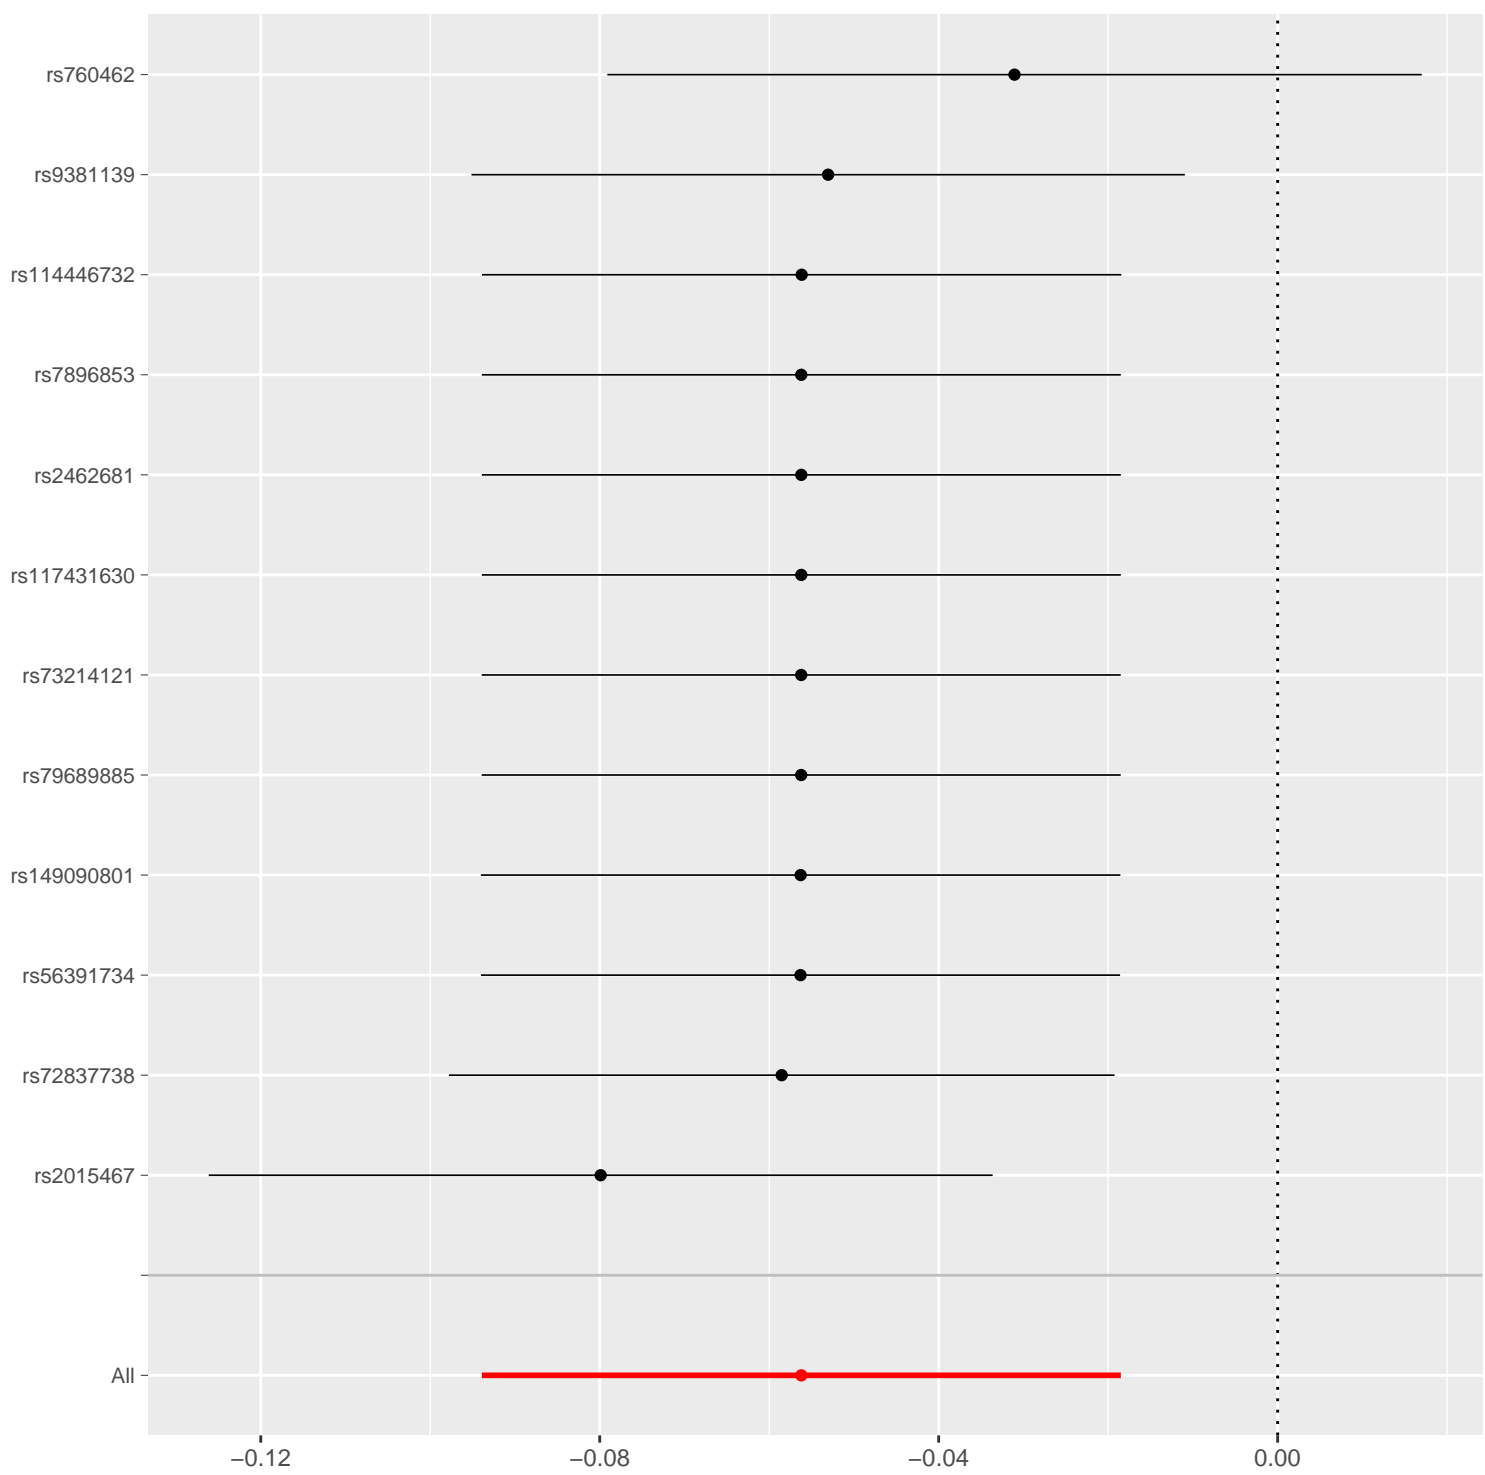

MR leave-one-out sensitivity analysis for 'CD11b on CD33dim HLA DR- ' on 'ER+ breast cancer'

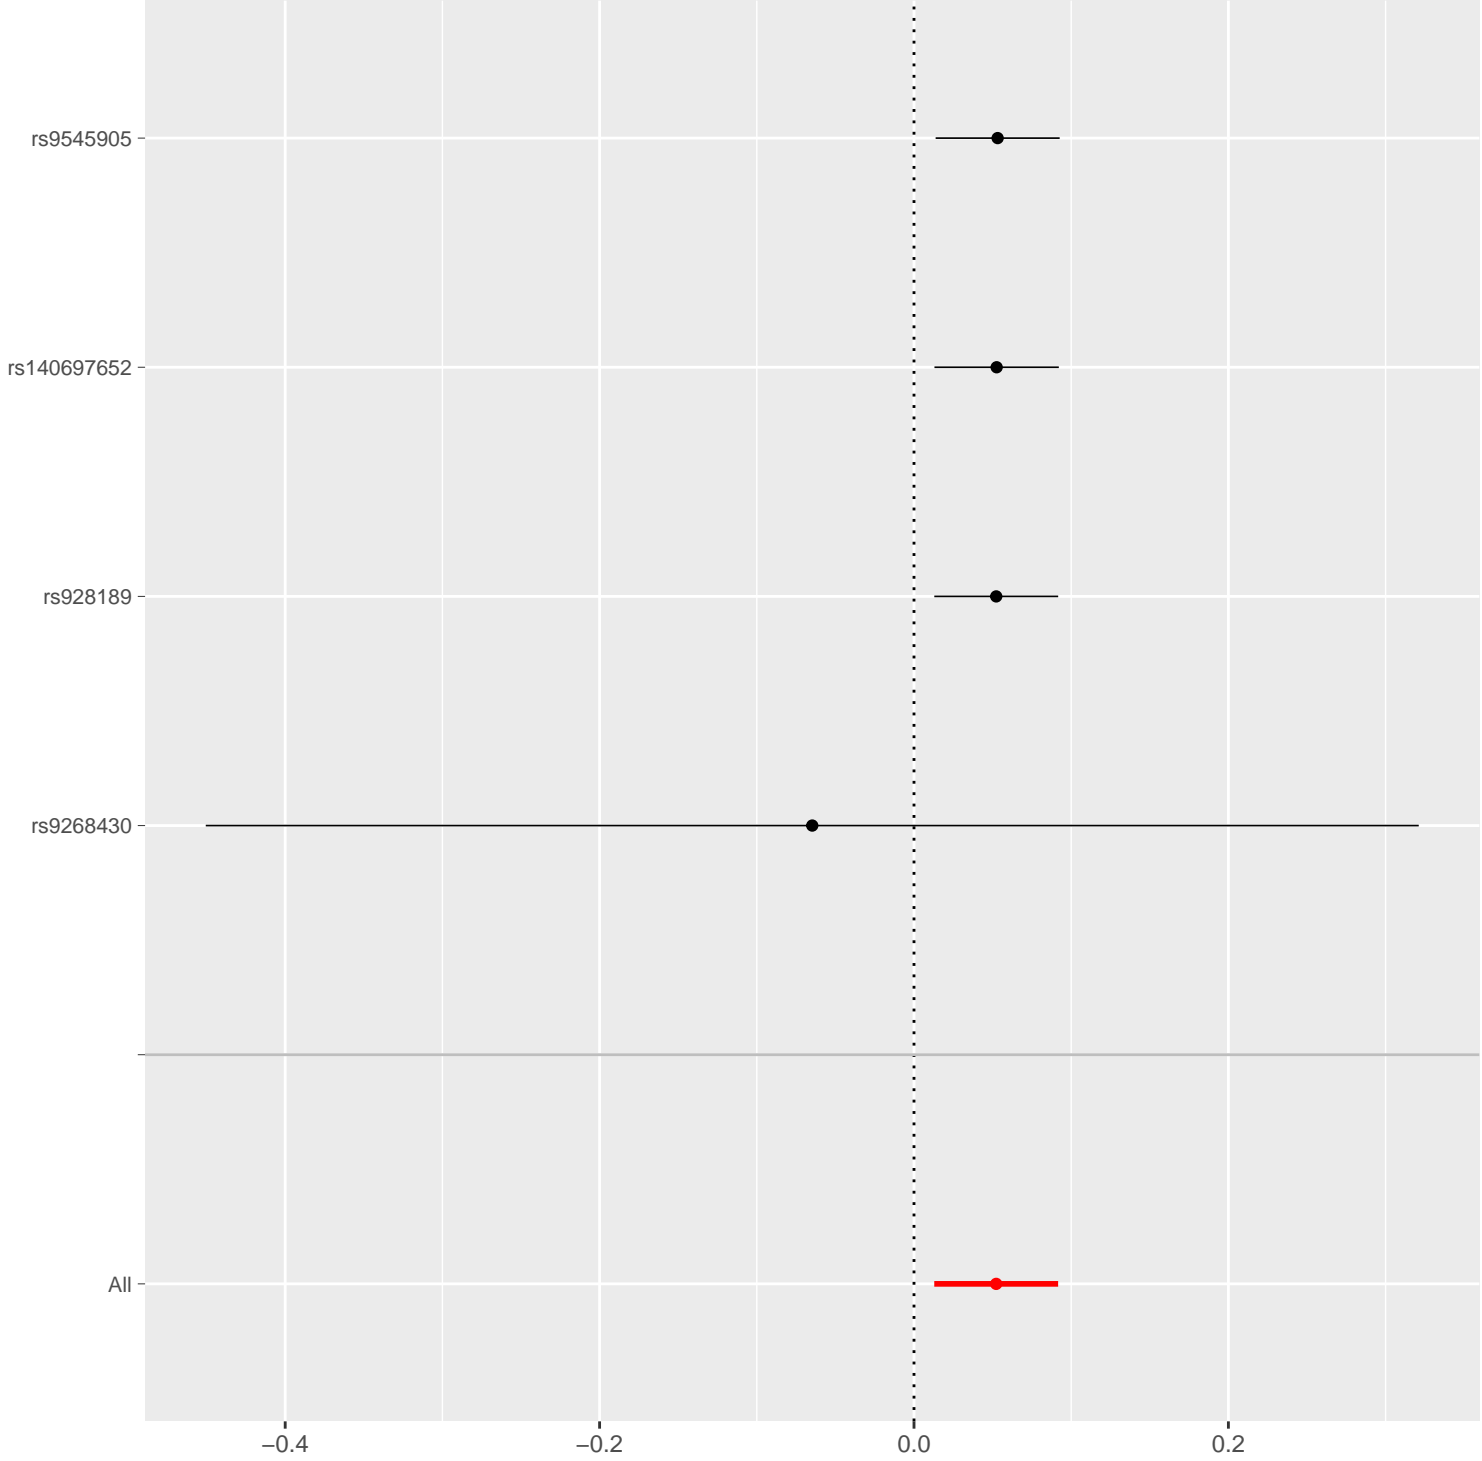

MR leave-one-out sensitivity analysis for 'HLA DR on CD33- HLA DR+ on 'ER+ breast cancer'

rs185587352

rs72932690

rs181615229

rs149720446

All

-0.15

-0.10

-0.05

MR leave-one-out

0.00

sensitivity analysis for 'CD45RA+ CD8br  
%T cell on 'ER- breast cancer'

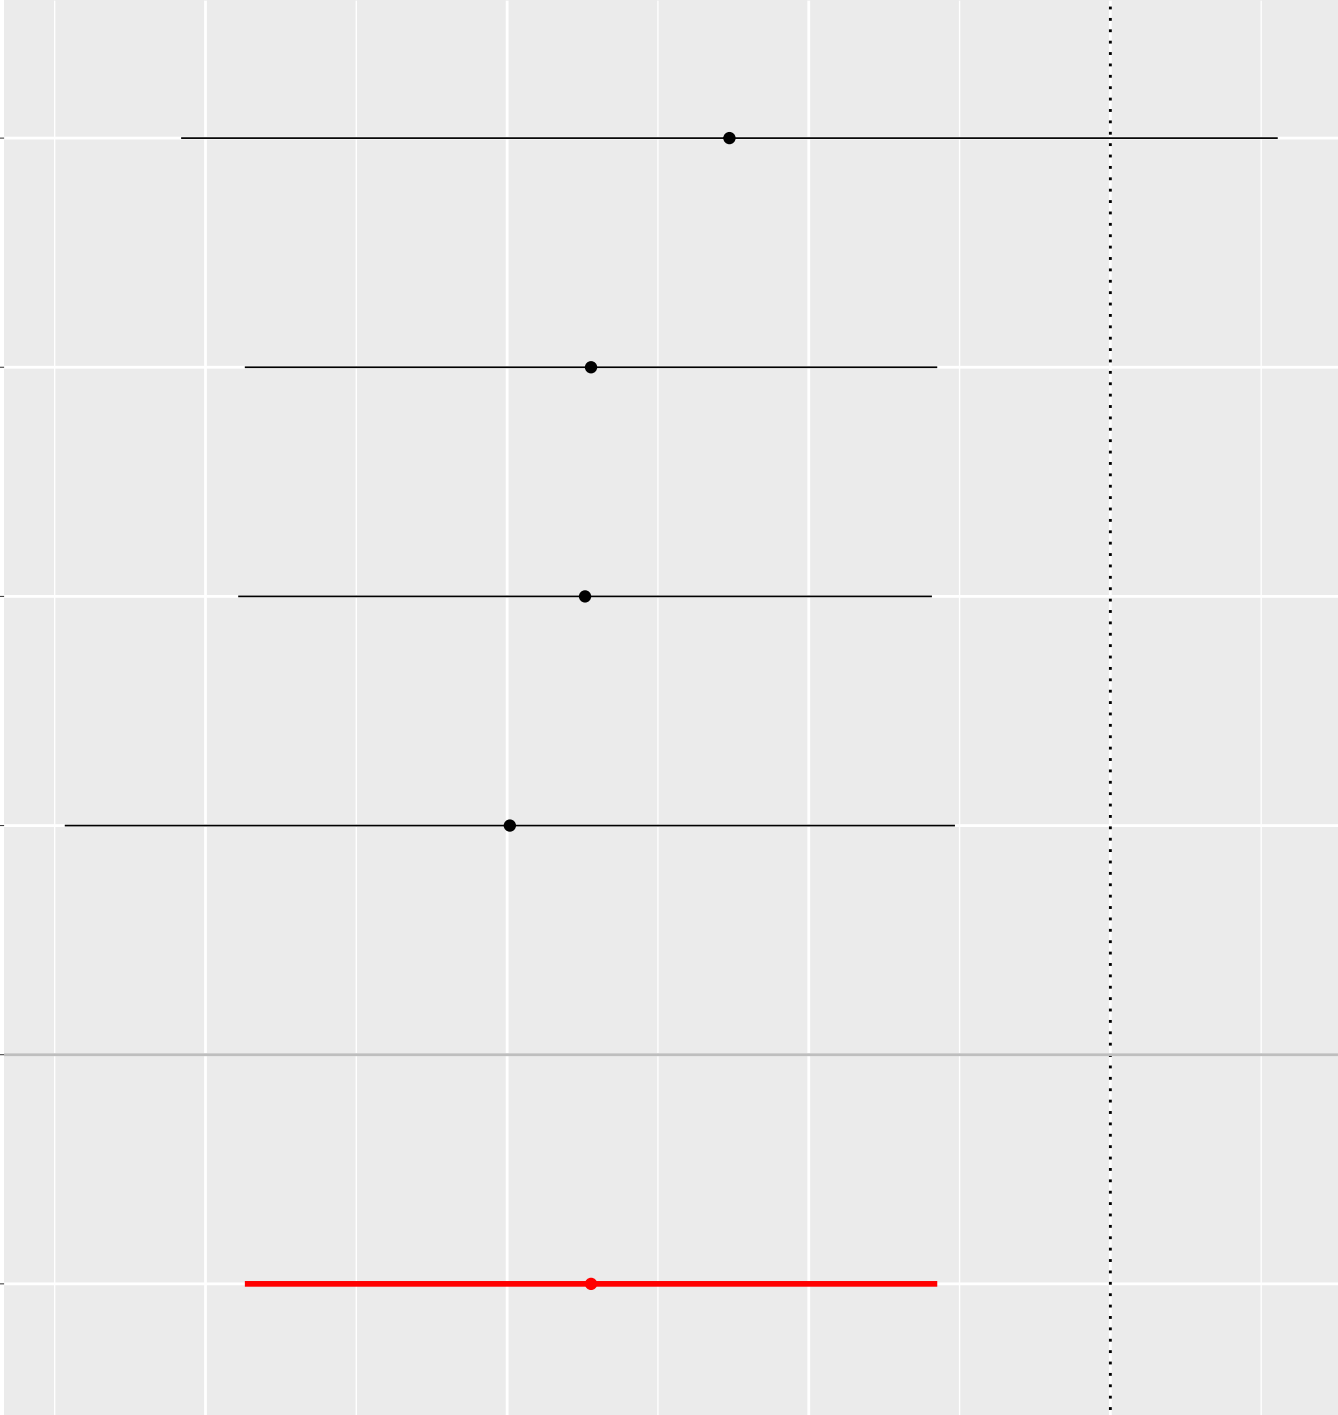

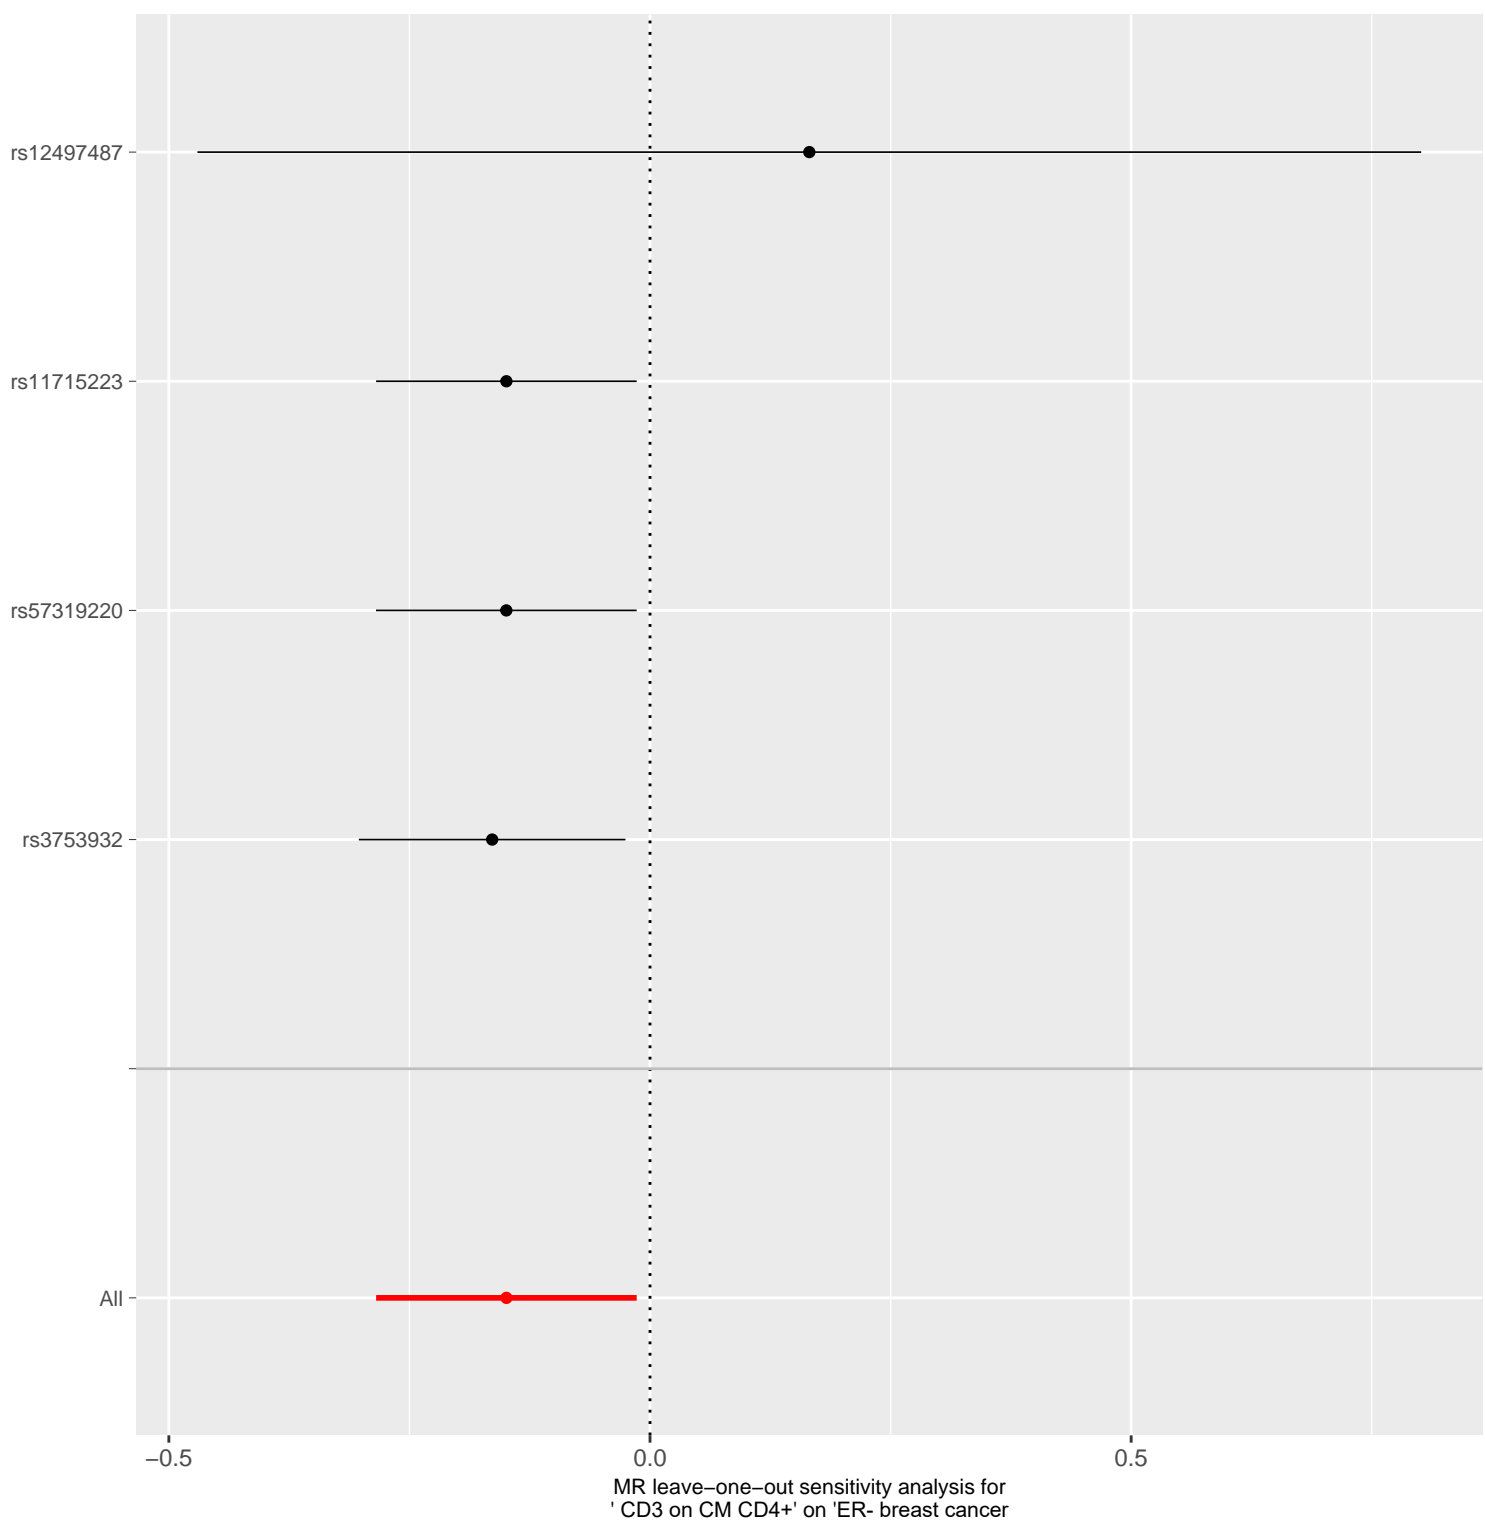



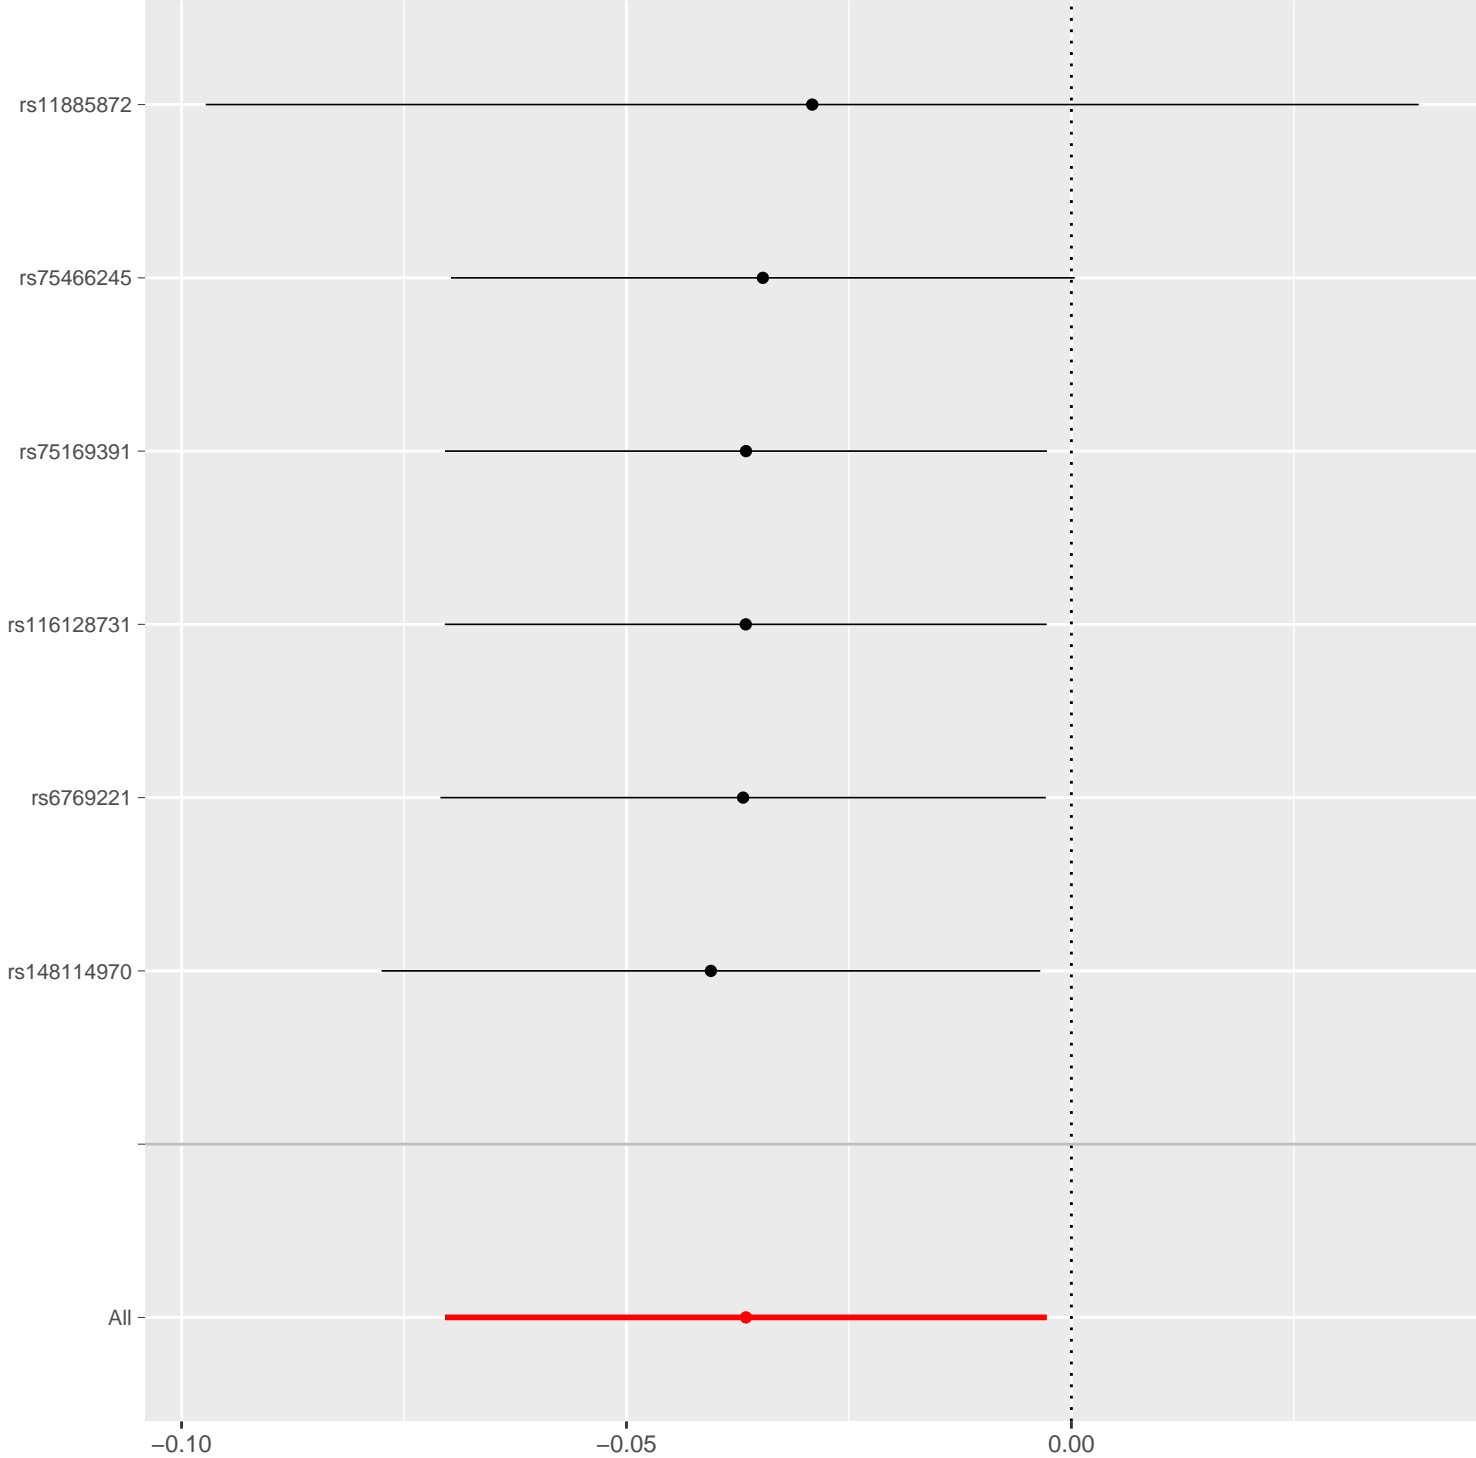

MR leave-one-out sensitivity analysis for 'CD3 on T cell' on 'ER- breast cancer'

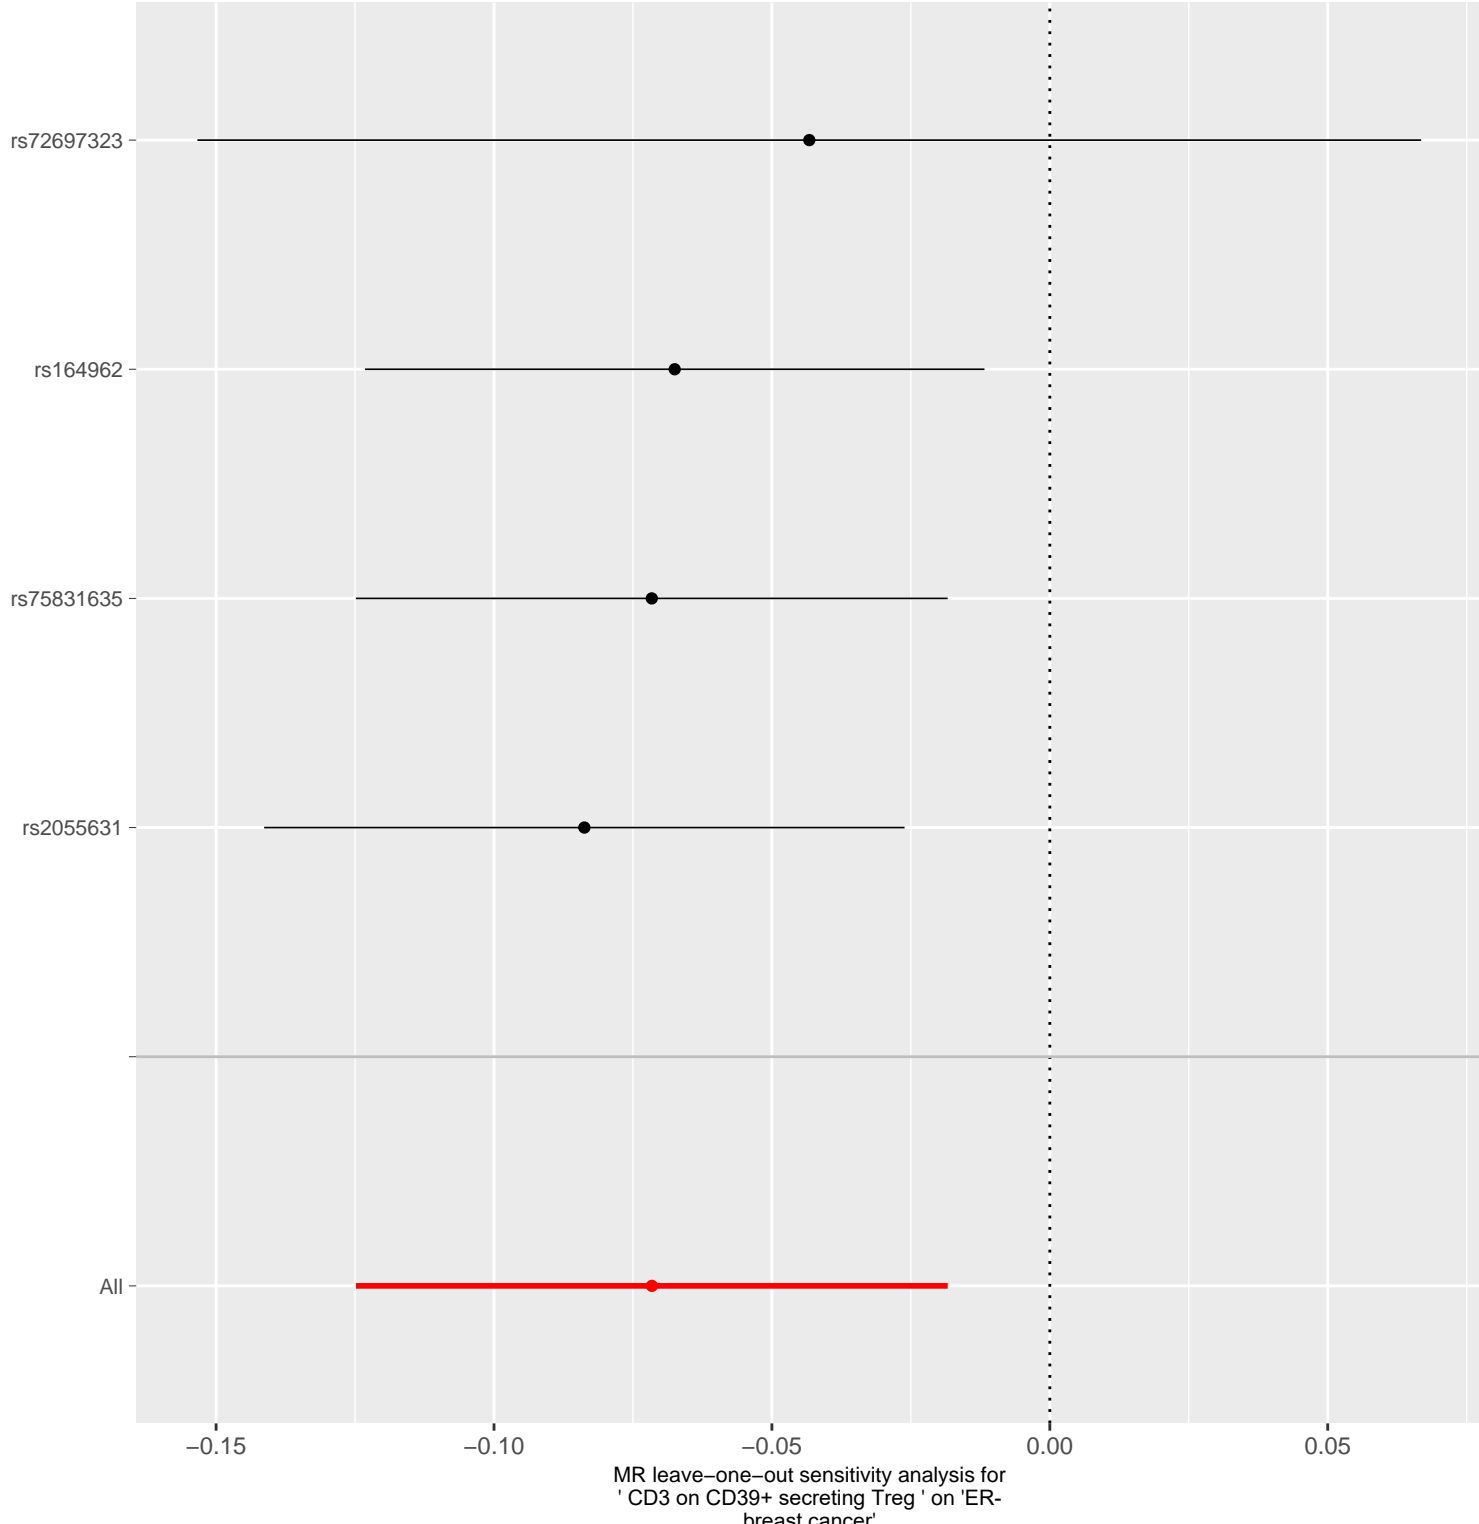

rs61814886

rs6658665

rs6668517

rs1398059

All

0.00

0.25

0.50

0.75

1.00

MR leave-one-out sensitivity analysis for  
'CD3 on resting Treg ' on 'ER- breast  
cancer'

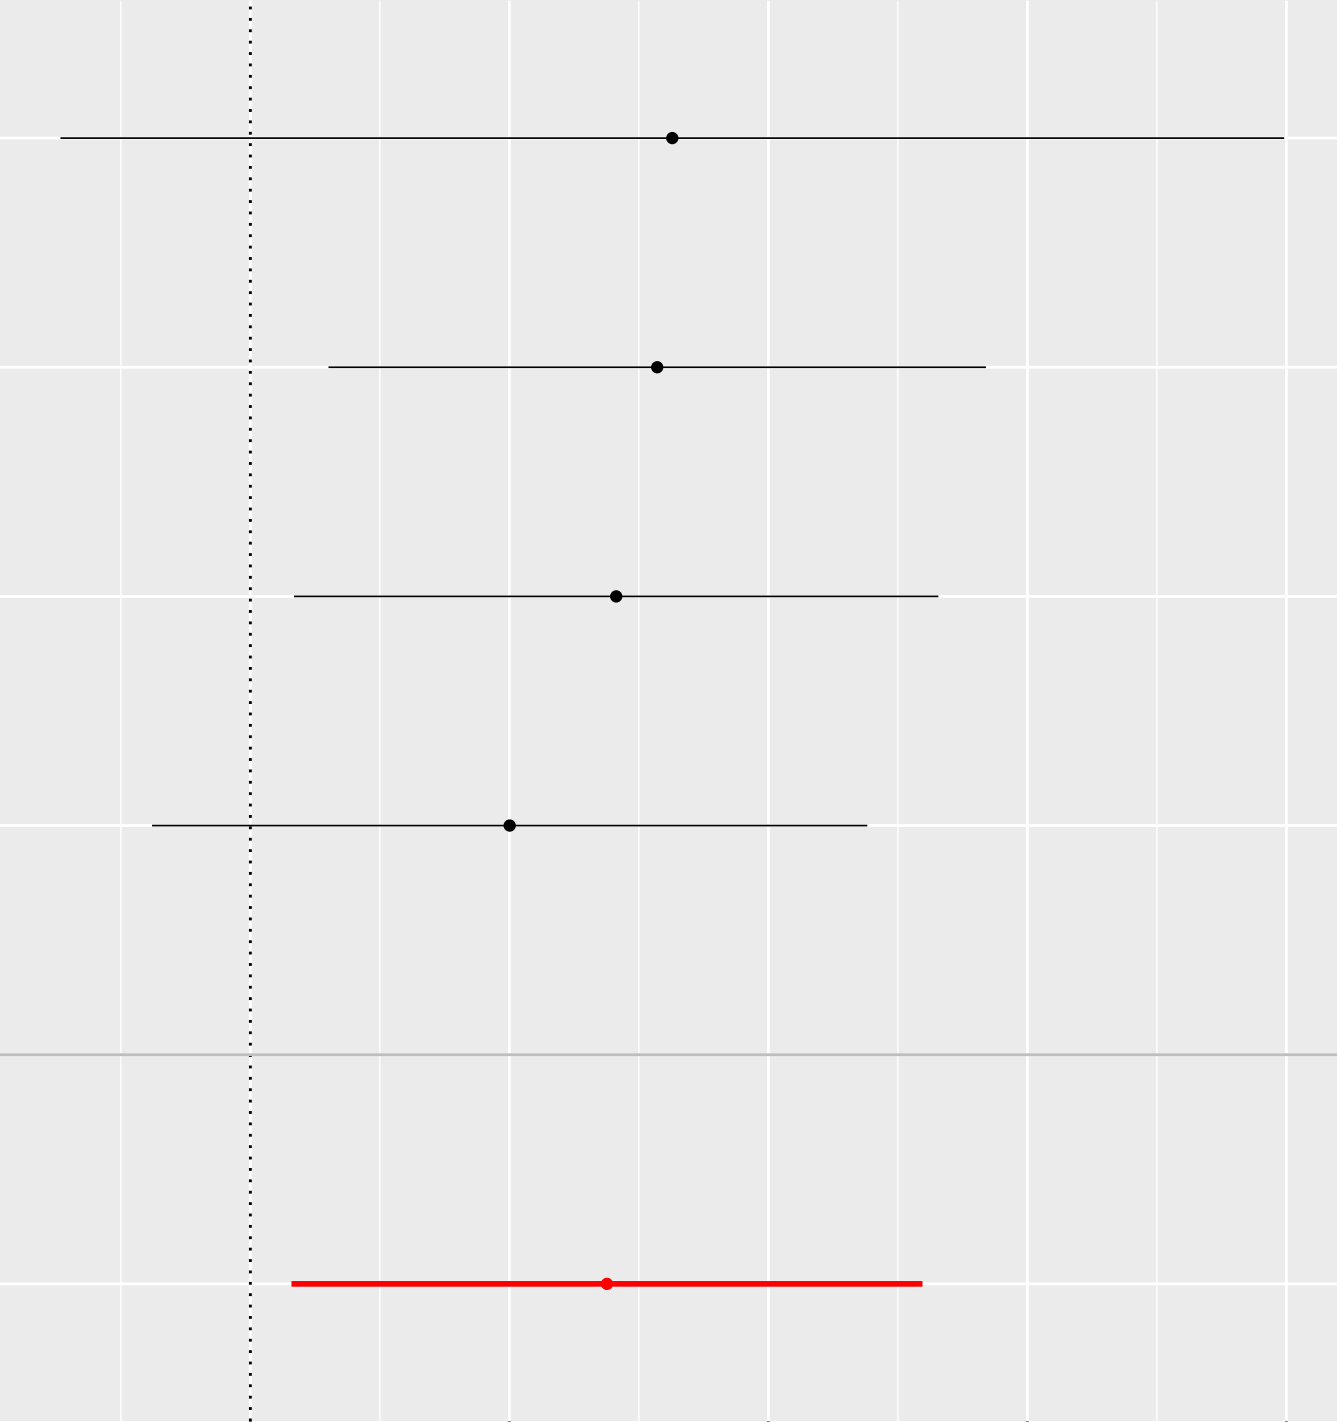

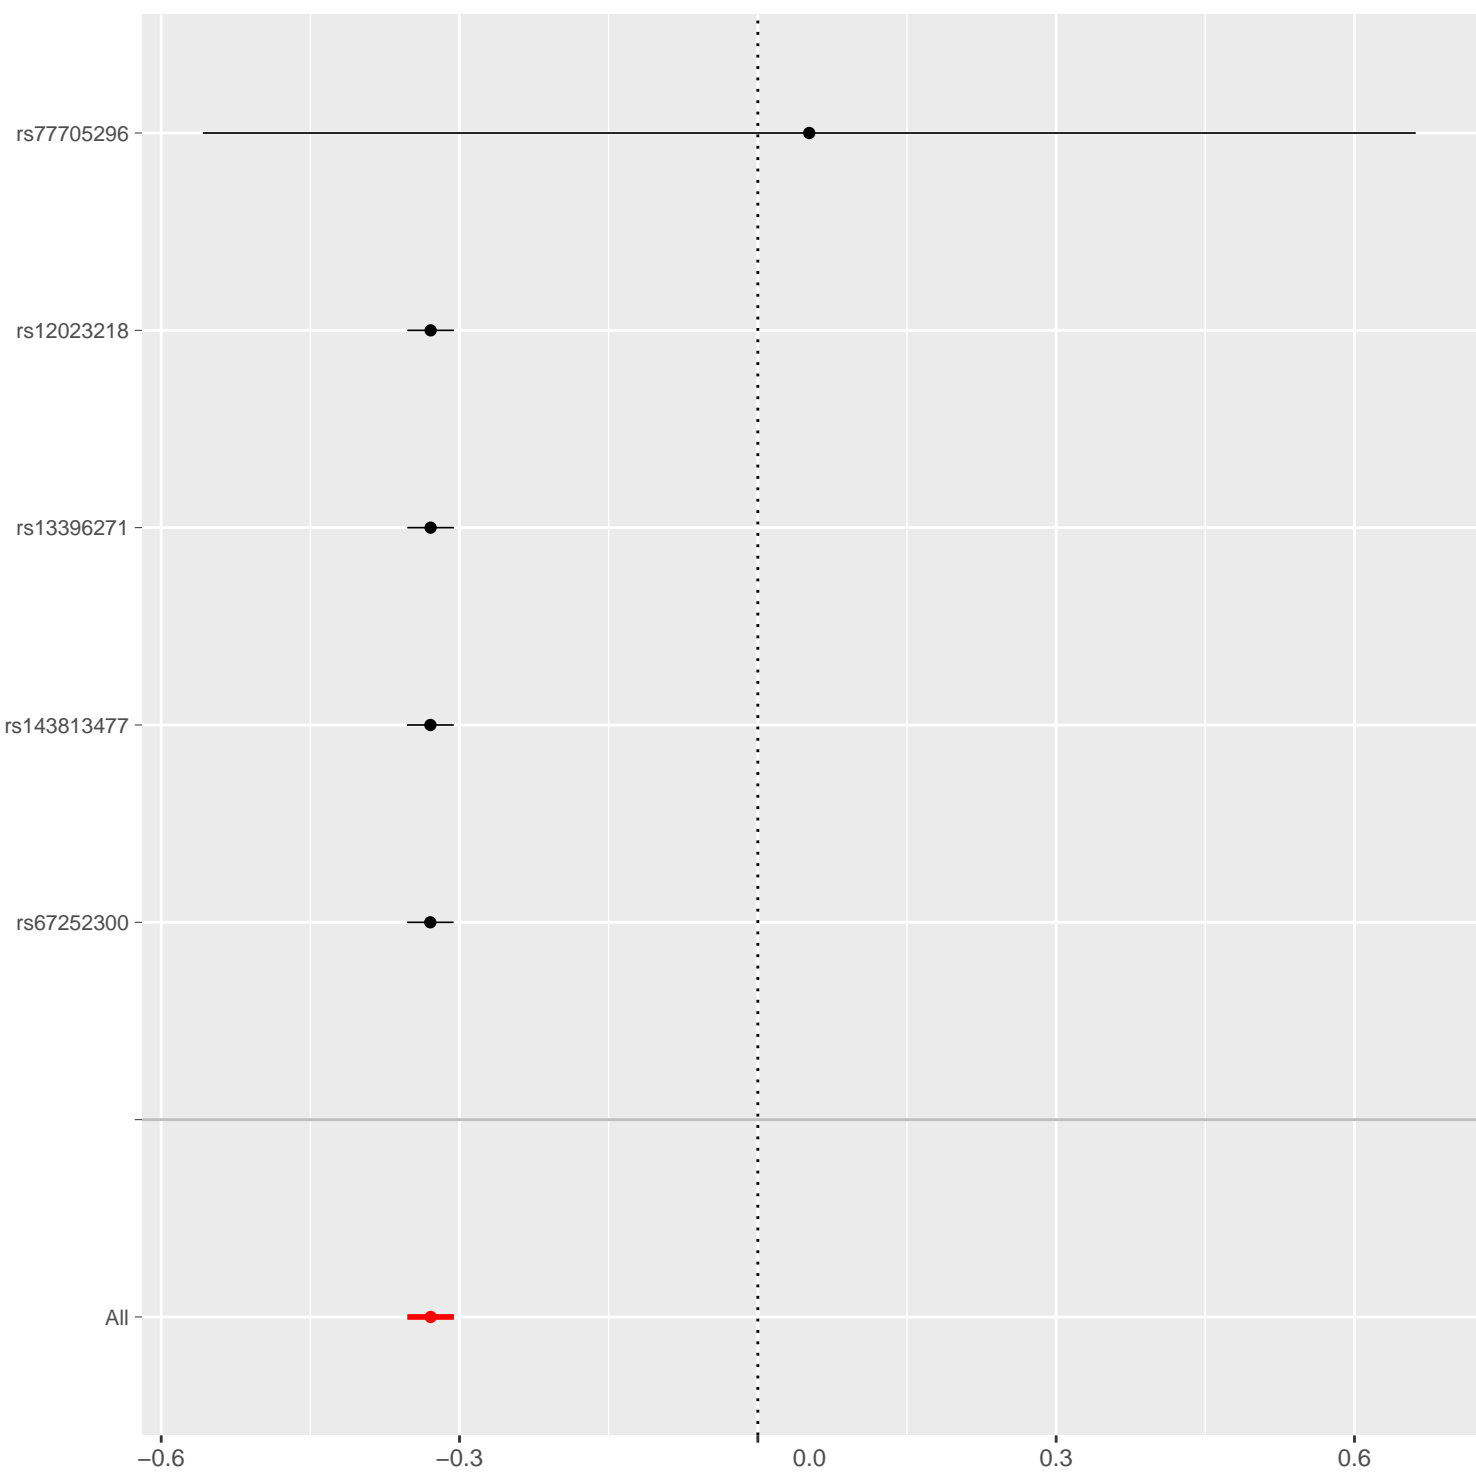

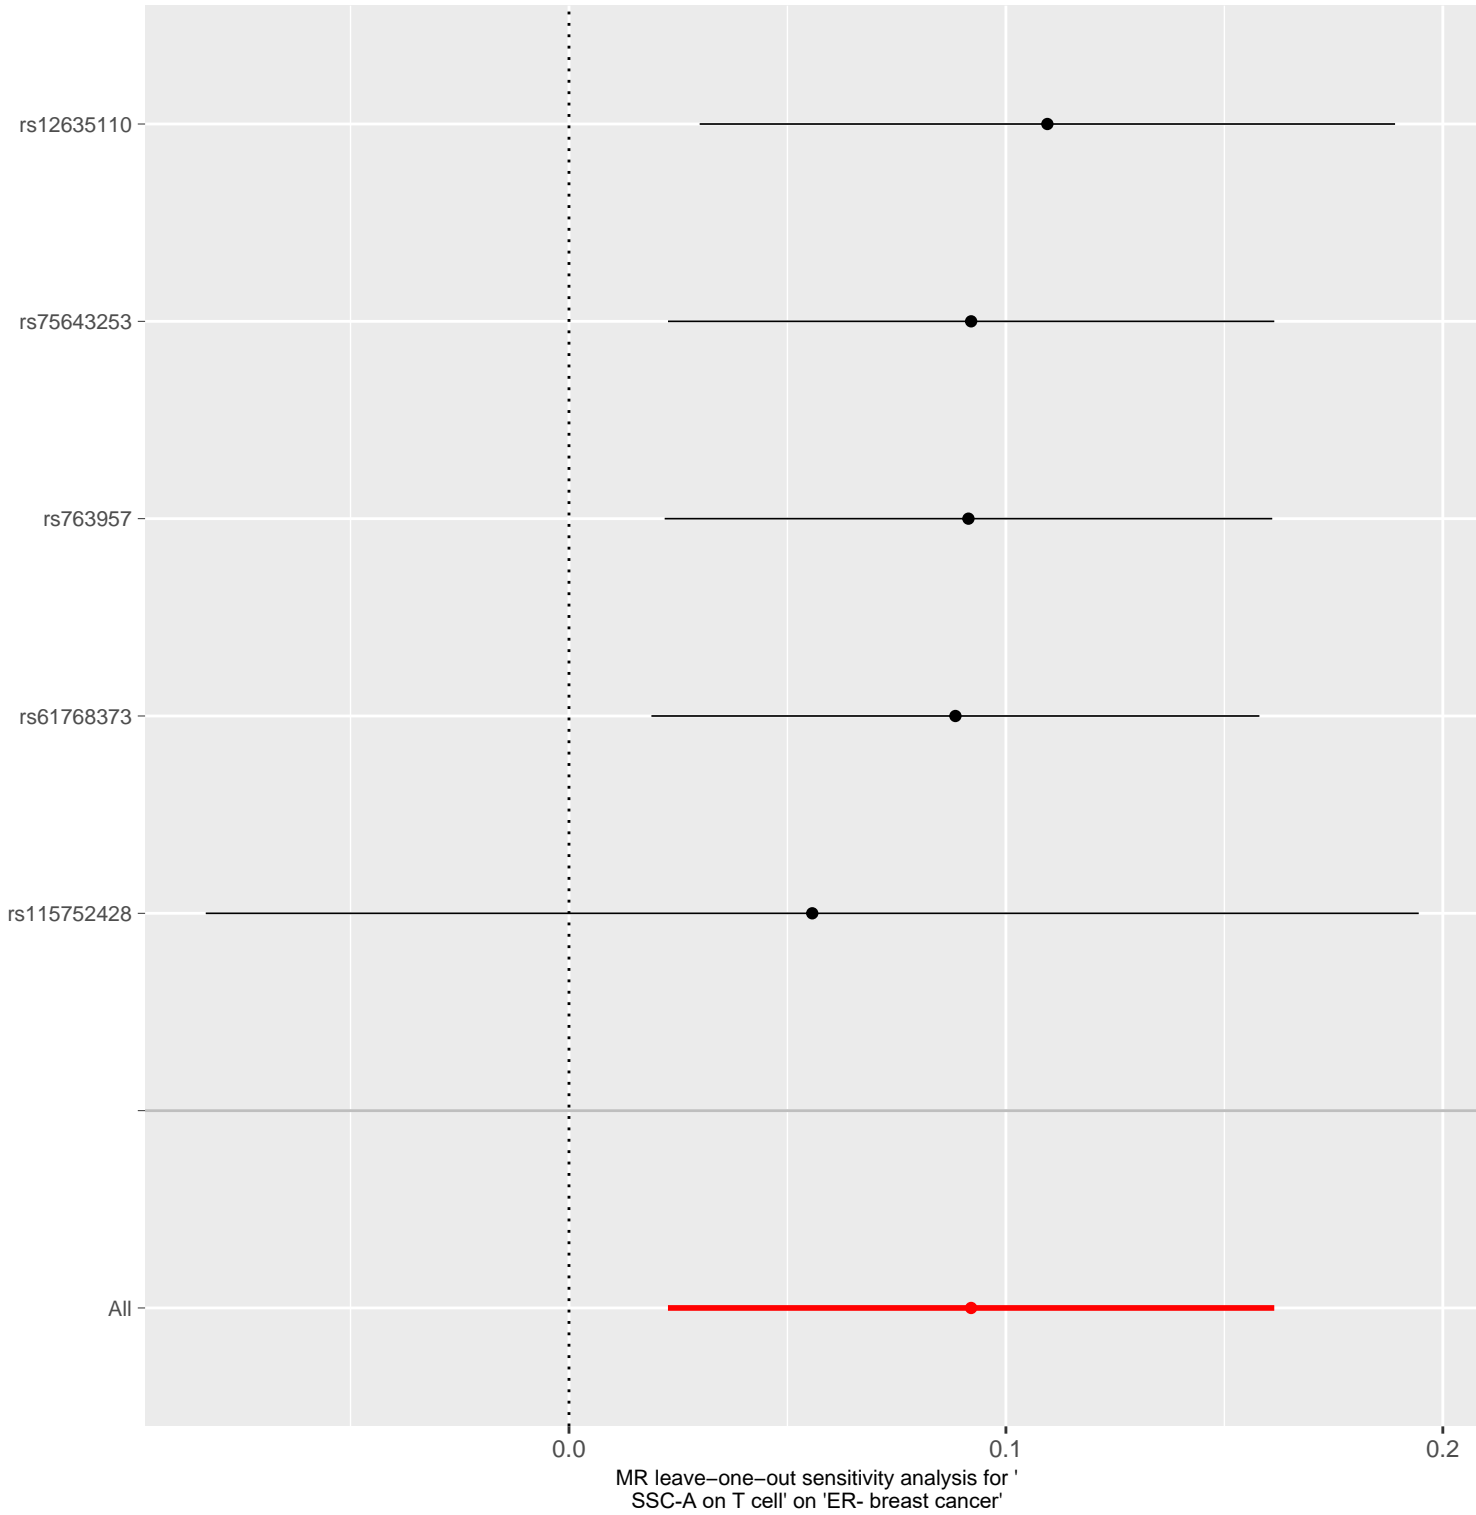

Supplement: DataSheet_1.pdf [file DataSheet_1.pdf]
