# Supplementary material for: A Mendelian analysis of the relationships between immune cells and breast cancer
Source: PubMed Central journal article supplement (PMC10847340; doi:10.3389/fonc.2024.1341292), 2024-01-24

### MR Method

Funnel plot to assess heterogeneity between  
IgD+ %B cell and overall breast cancer

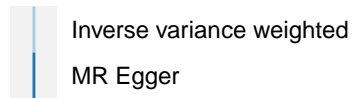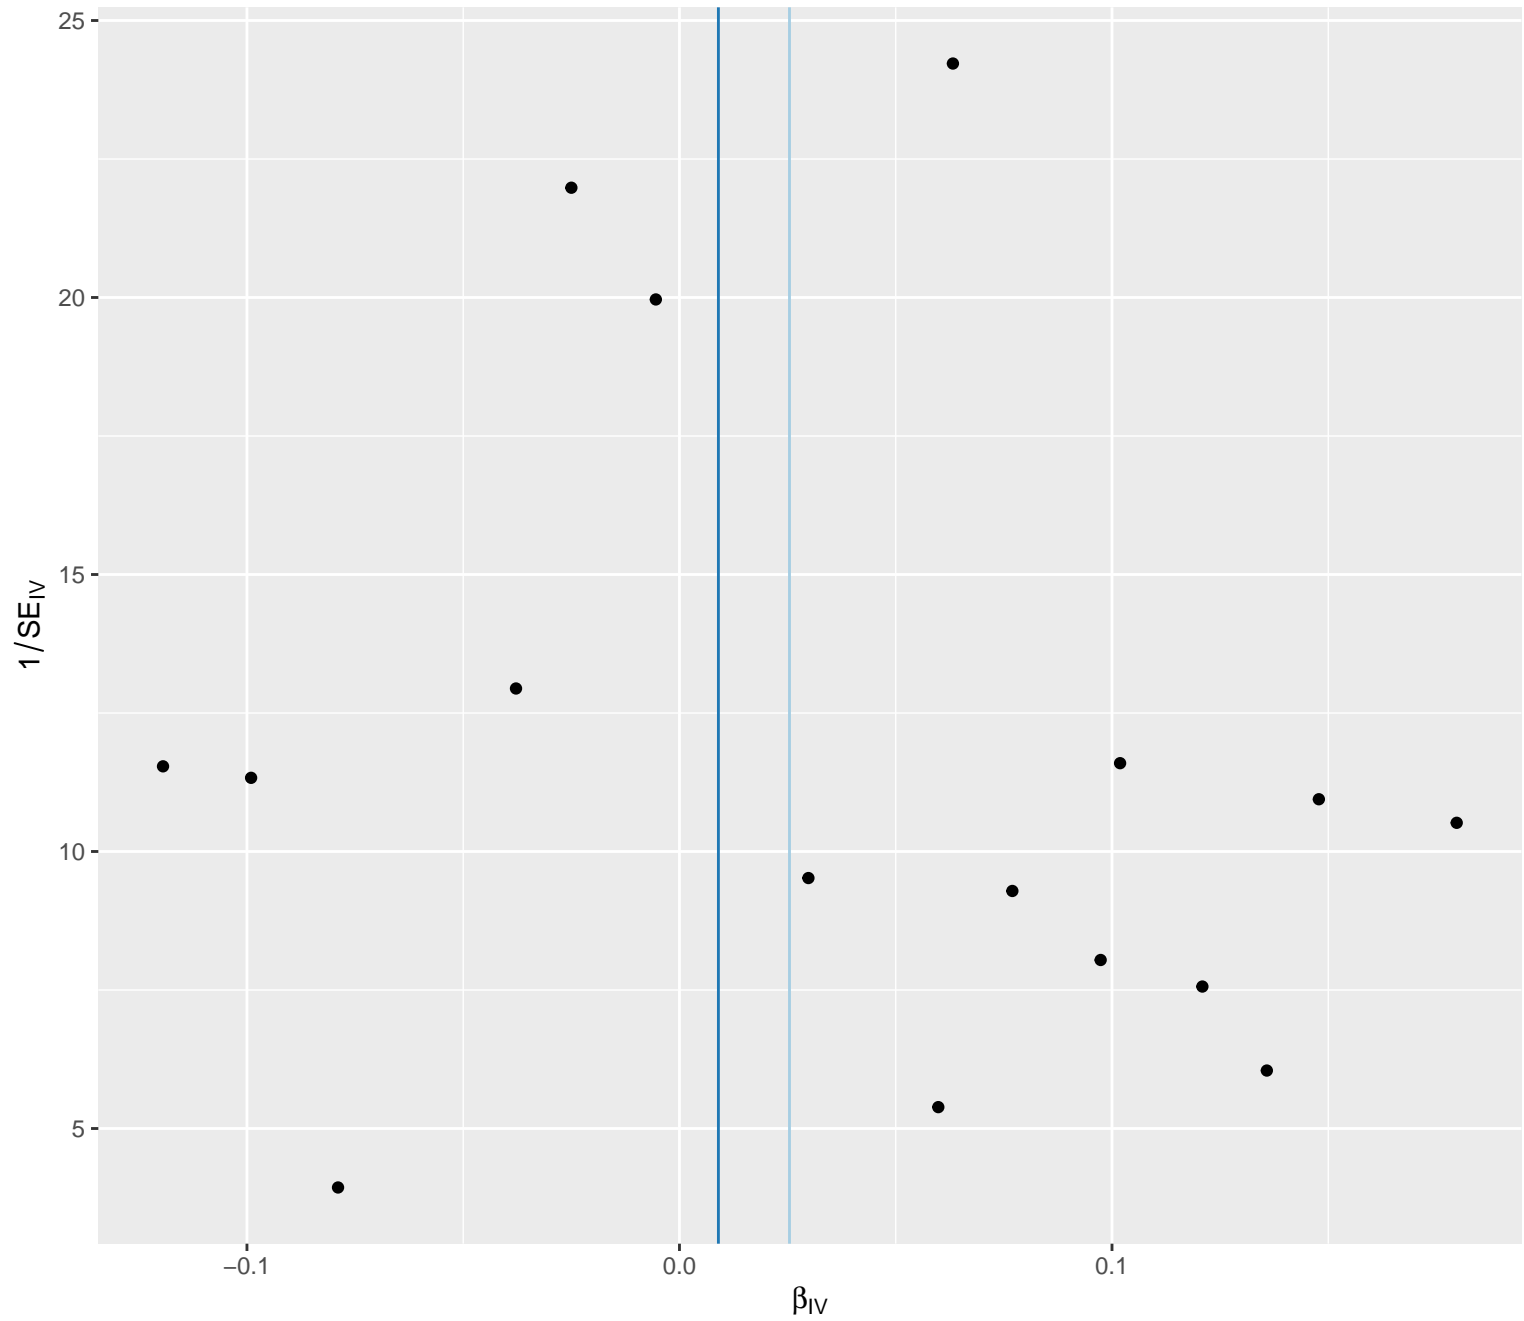

Funnel plot to assess heterogeneity between  
lgD+ CD24+ %B cell and overall breast cancer

MR Method

- Inverse variance weighted
- MR Egger

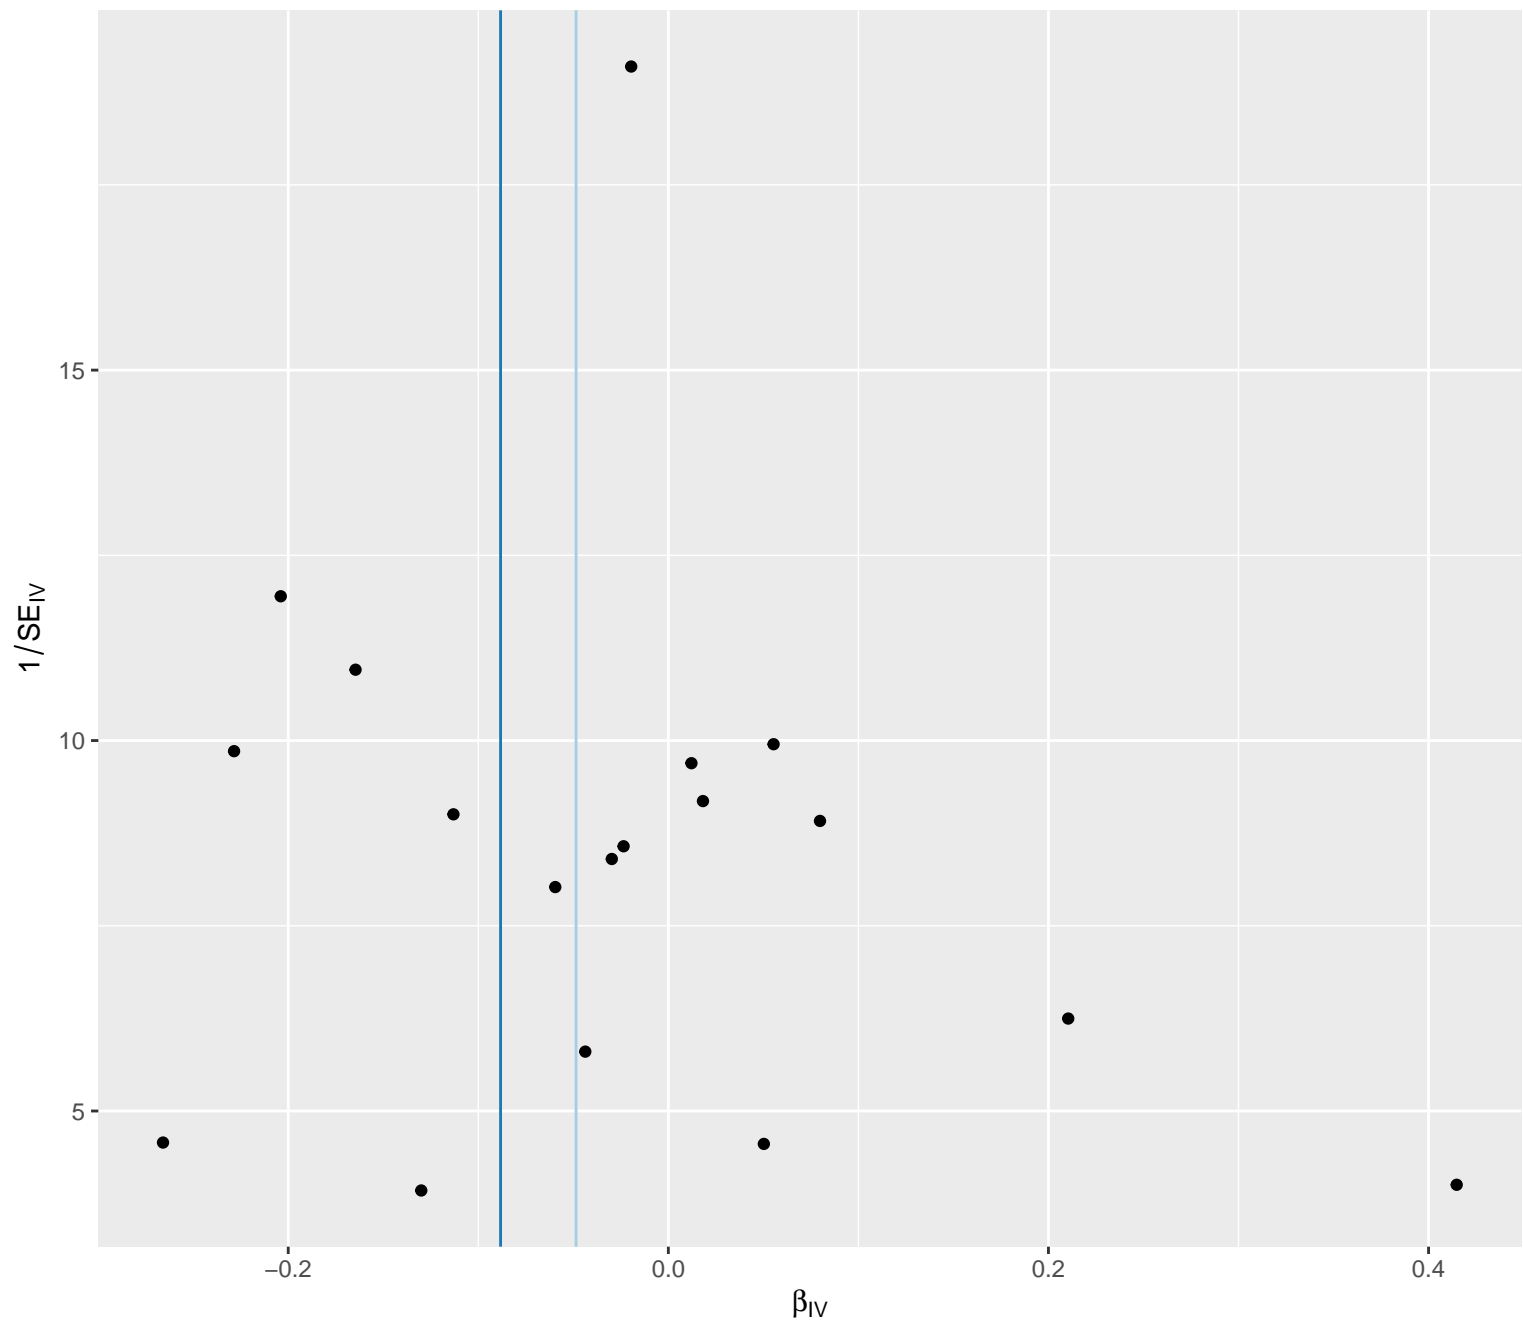

Funnel plot to assess heterogeneity between  
CD20- CD38- %B cell and overall breast cancer

### MR Method

- Inverse variance weighted
- MR Egger

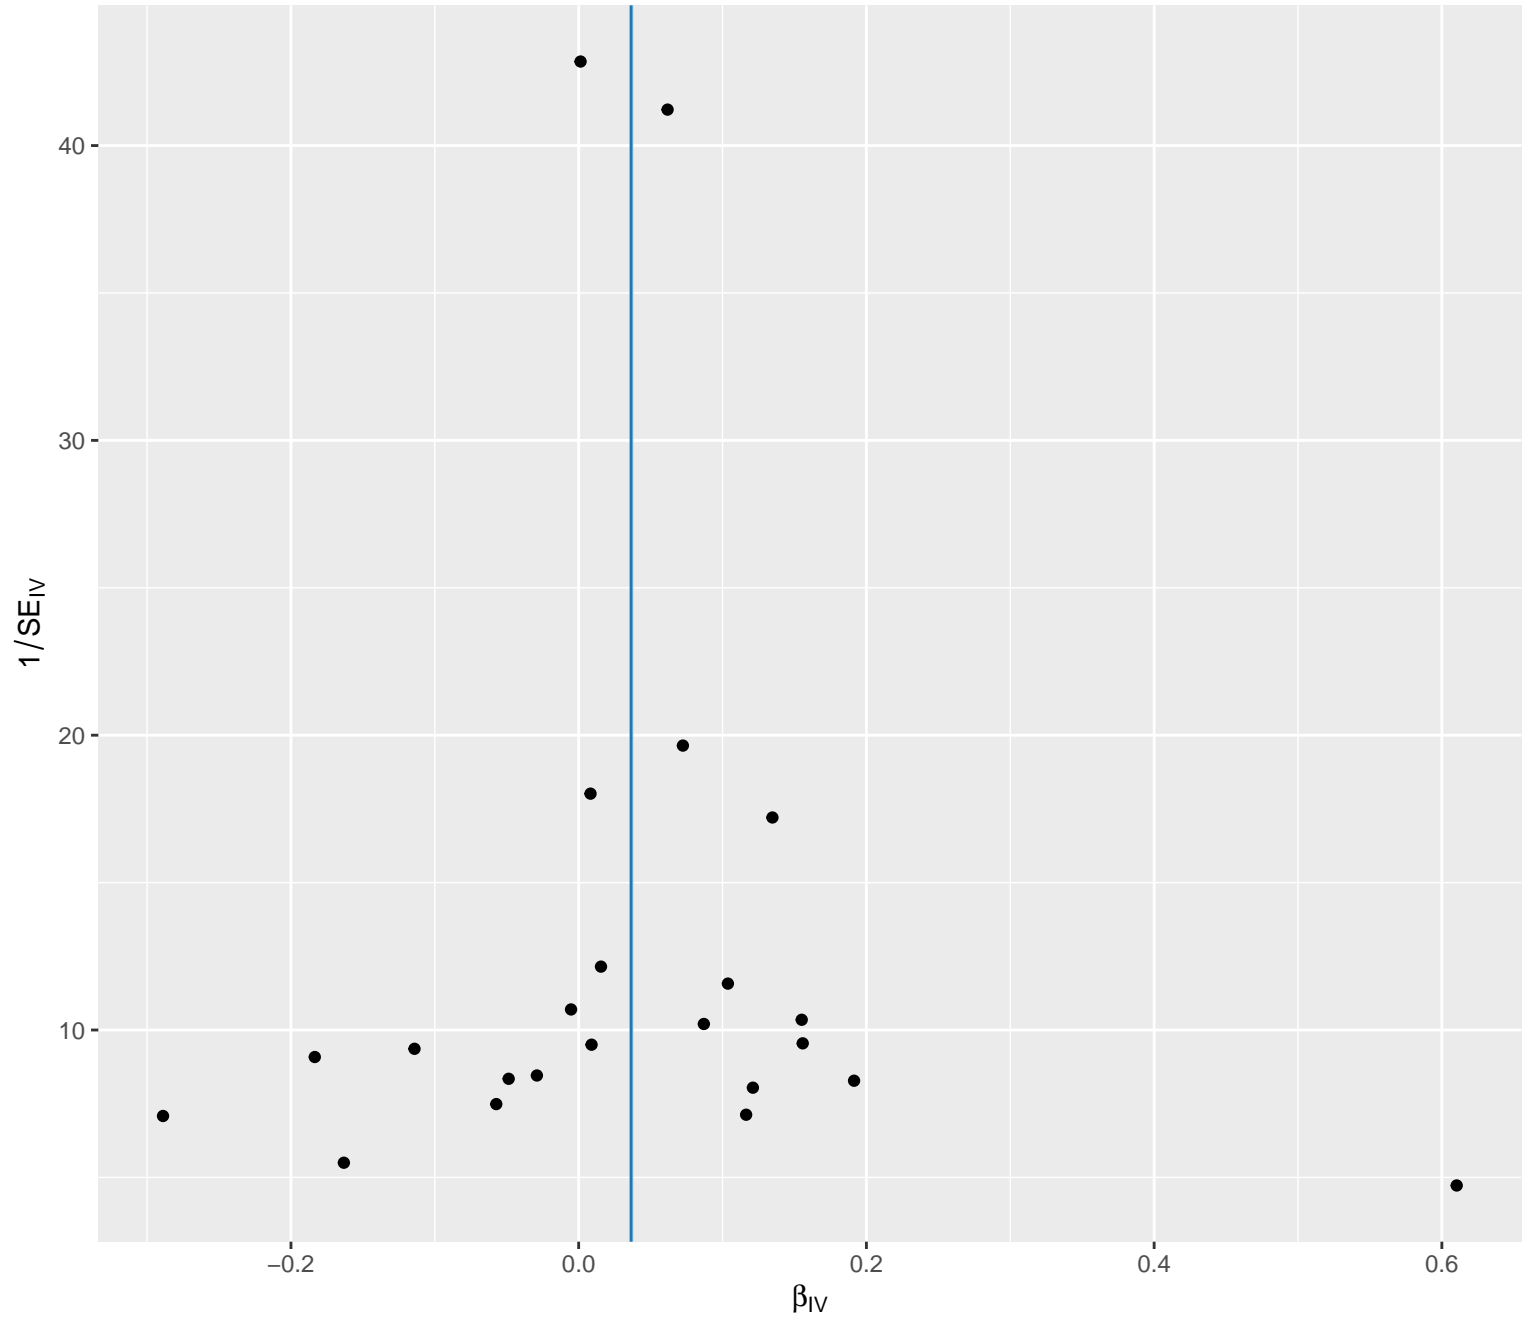

### MR Method

- Inverse variance weighted
- MR Egger

Funnel plot to assess heterogeneity between CD11c+ HLA DR++ monocyte %monocyte and overall breast cancer

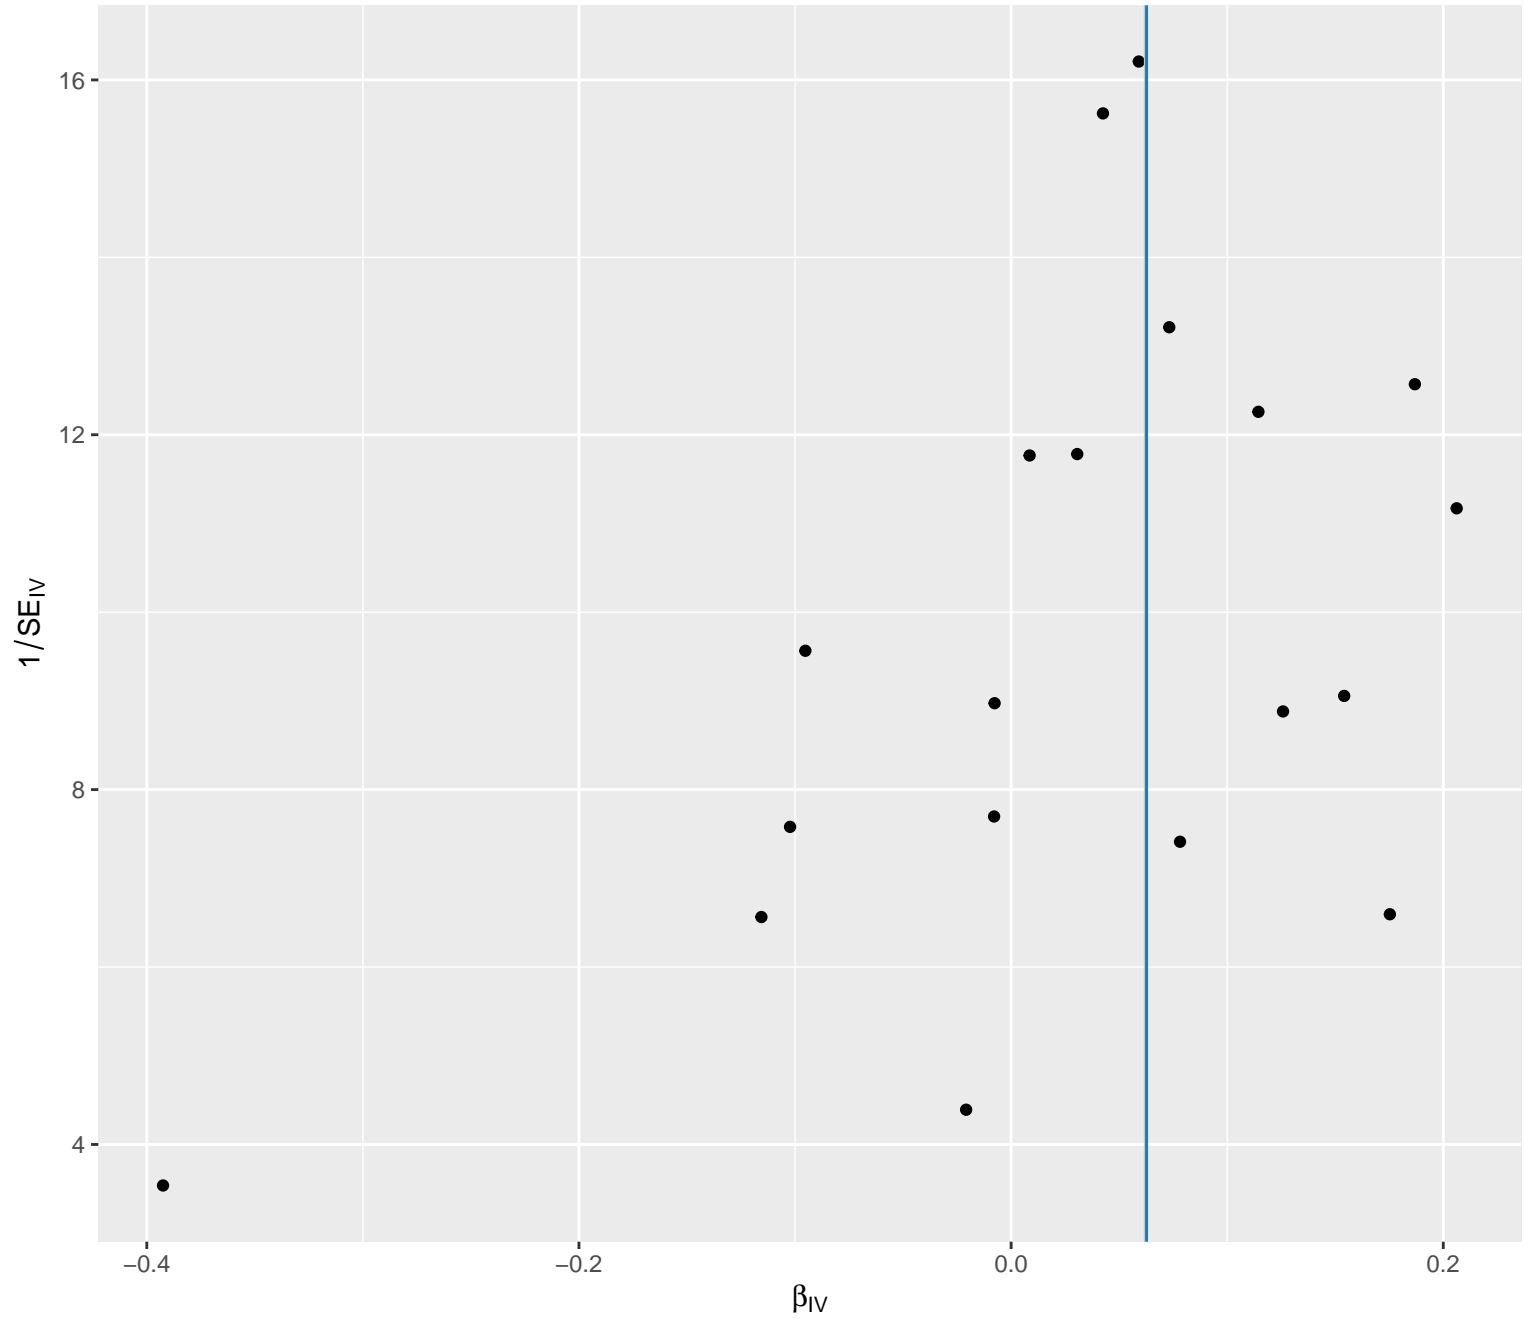

Funnel plot to assess heterogeneity between  
Activated & resting Treg AC and overall breast cancer

MR Method

- Inverse variance weighted
- MR Egger

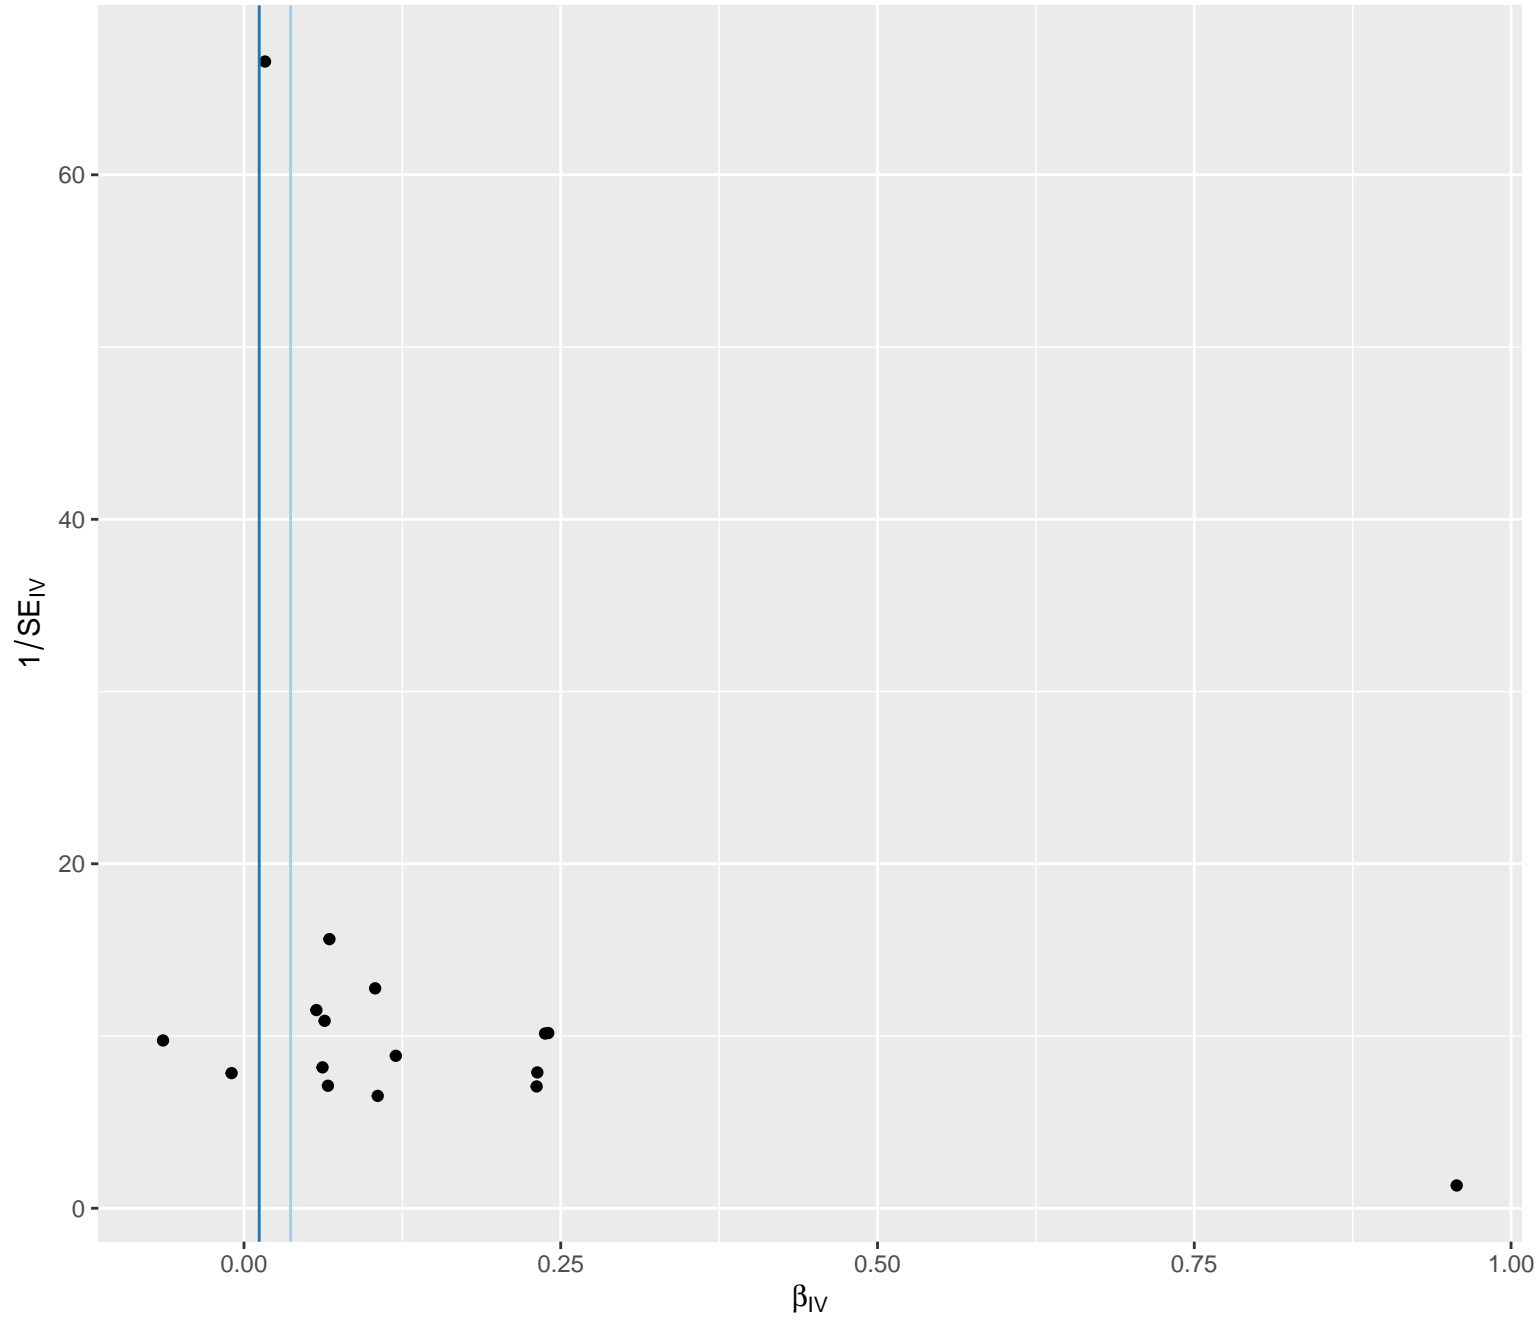

Funnel plot to assess heterogeneity between  
Activated & secreting Treg %CD4+  
and overall breast cancer

### MR Method

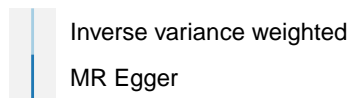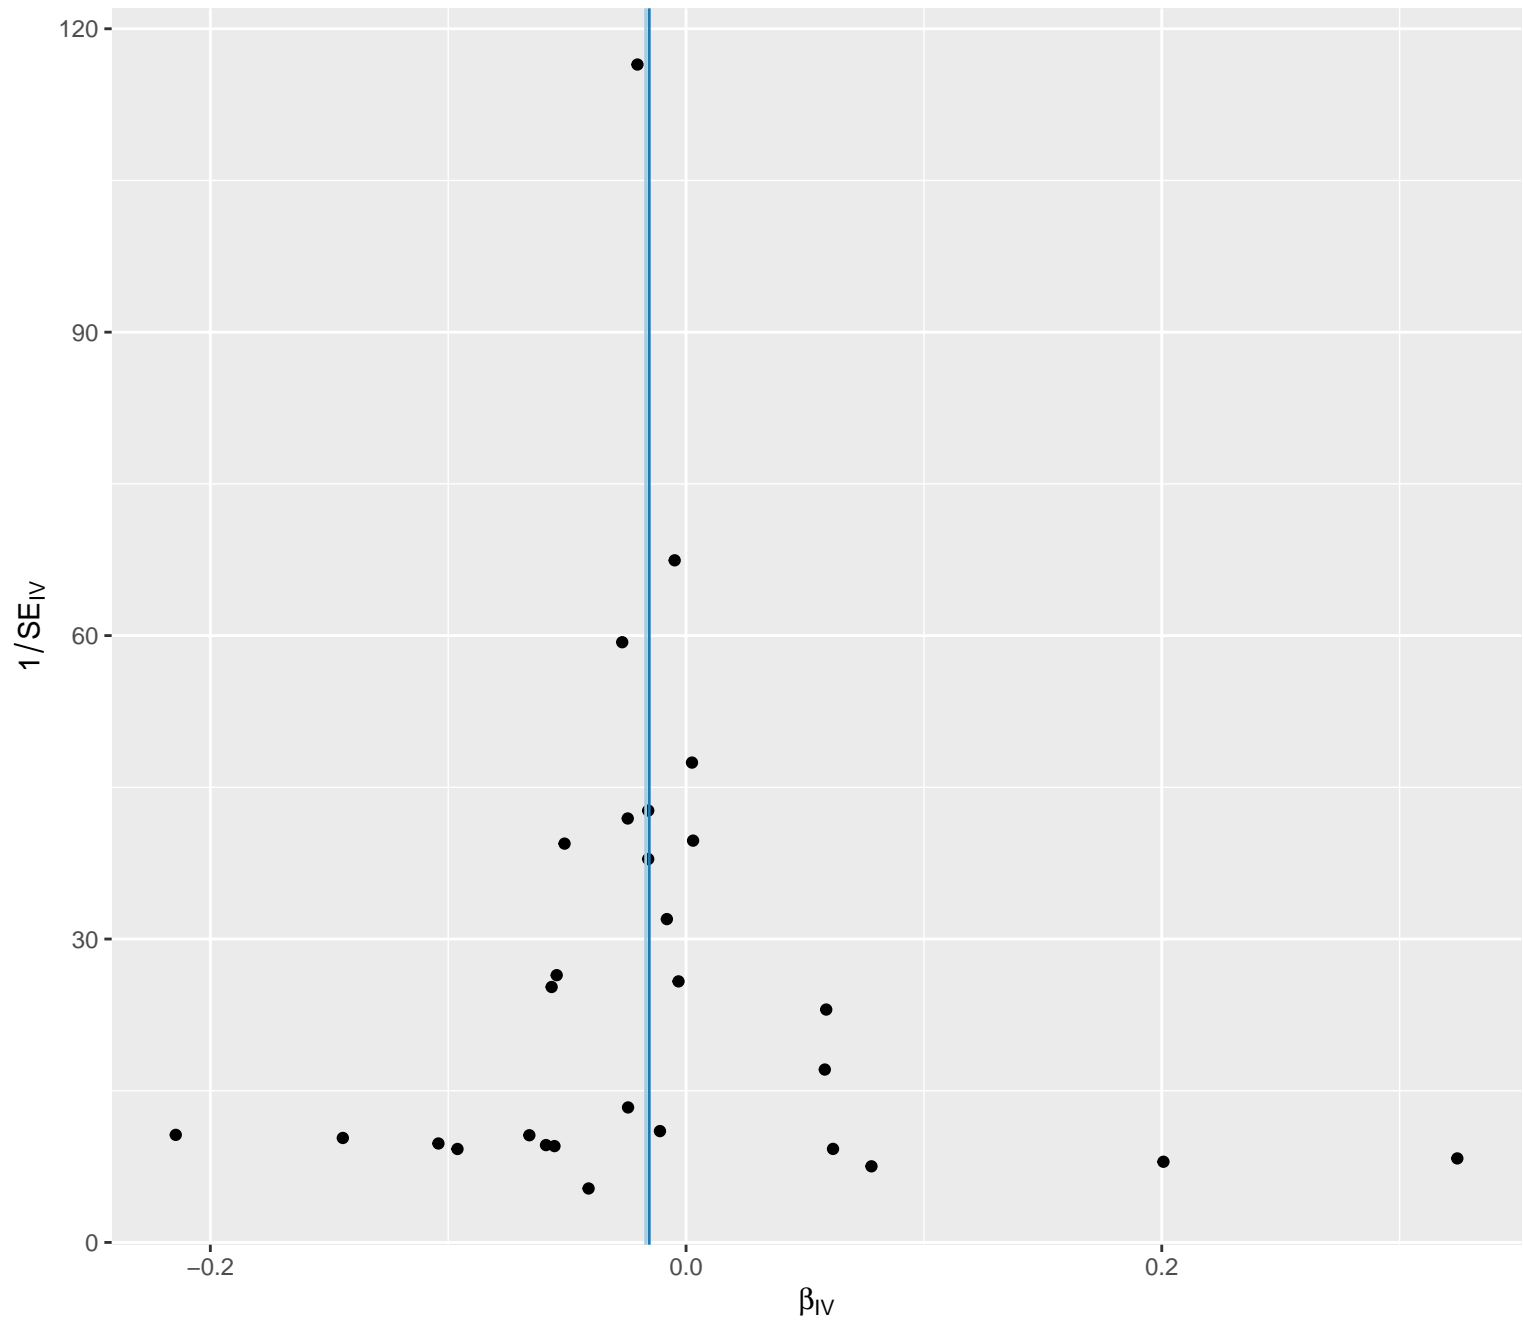

Funnel plot to assess heterogeneity between  
CD33- HLA DR+ AC and overall breast cancer

MR Method

- Inverse variance weighted
- MR Egger

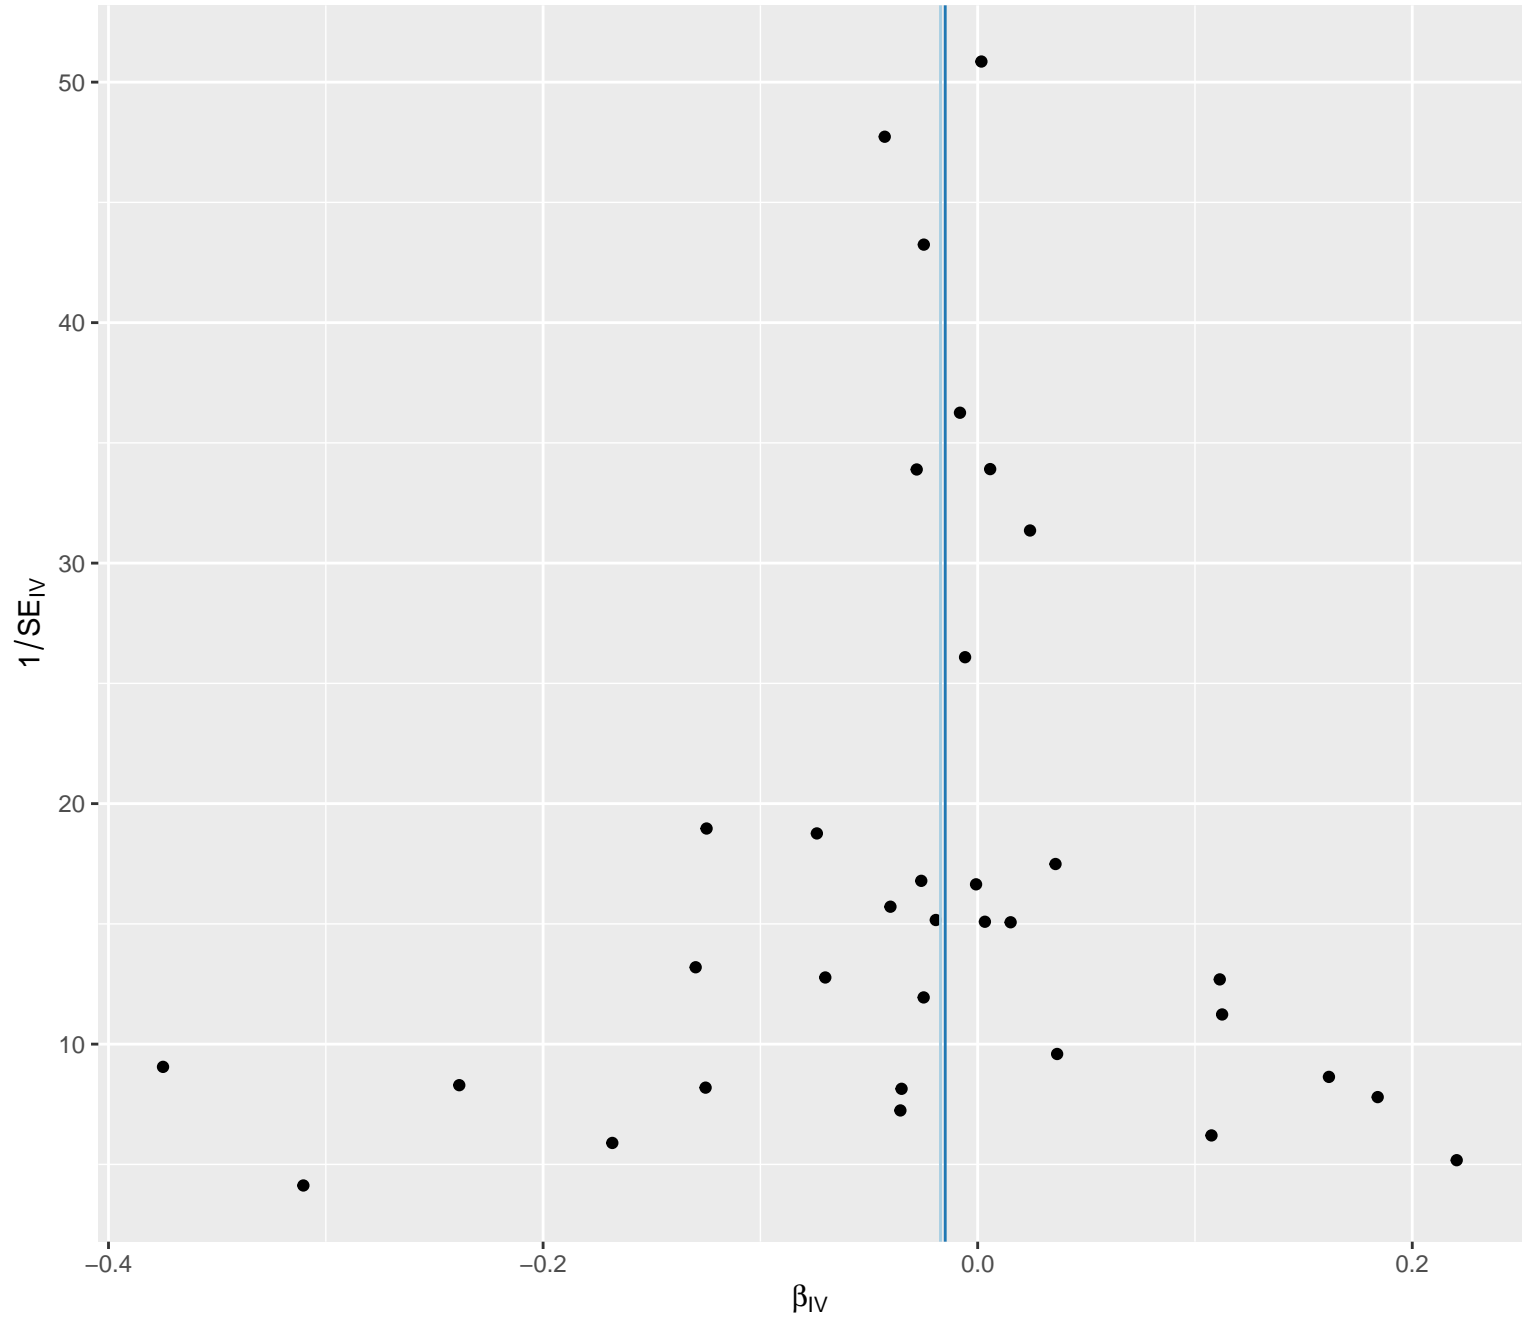

Funnel plot to assess heterogeneity between T/B and overall breast cancer

### MR Method

- Inverse variance weighted
- MR Egger

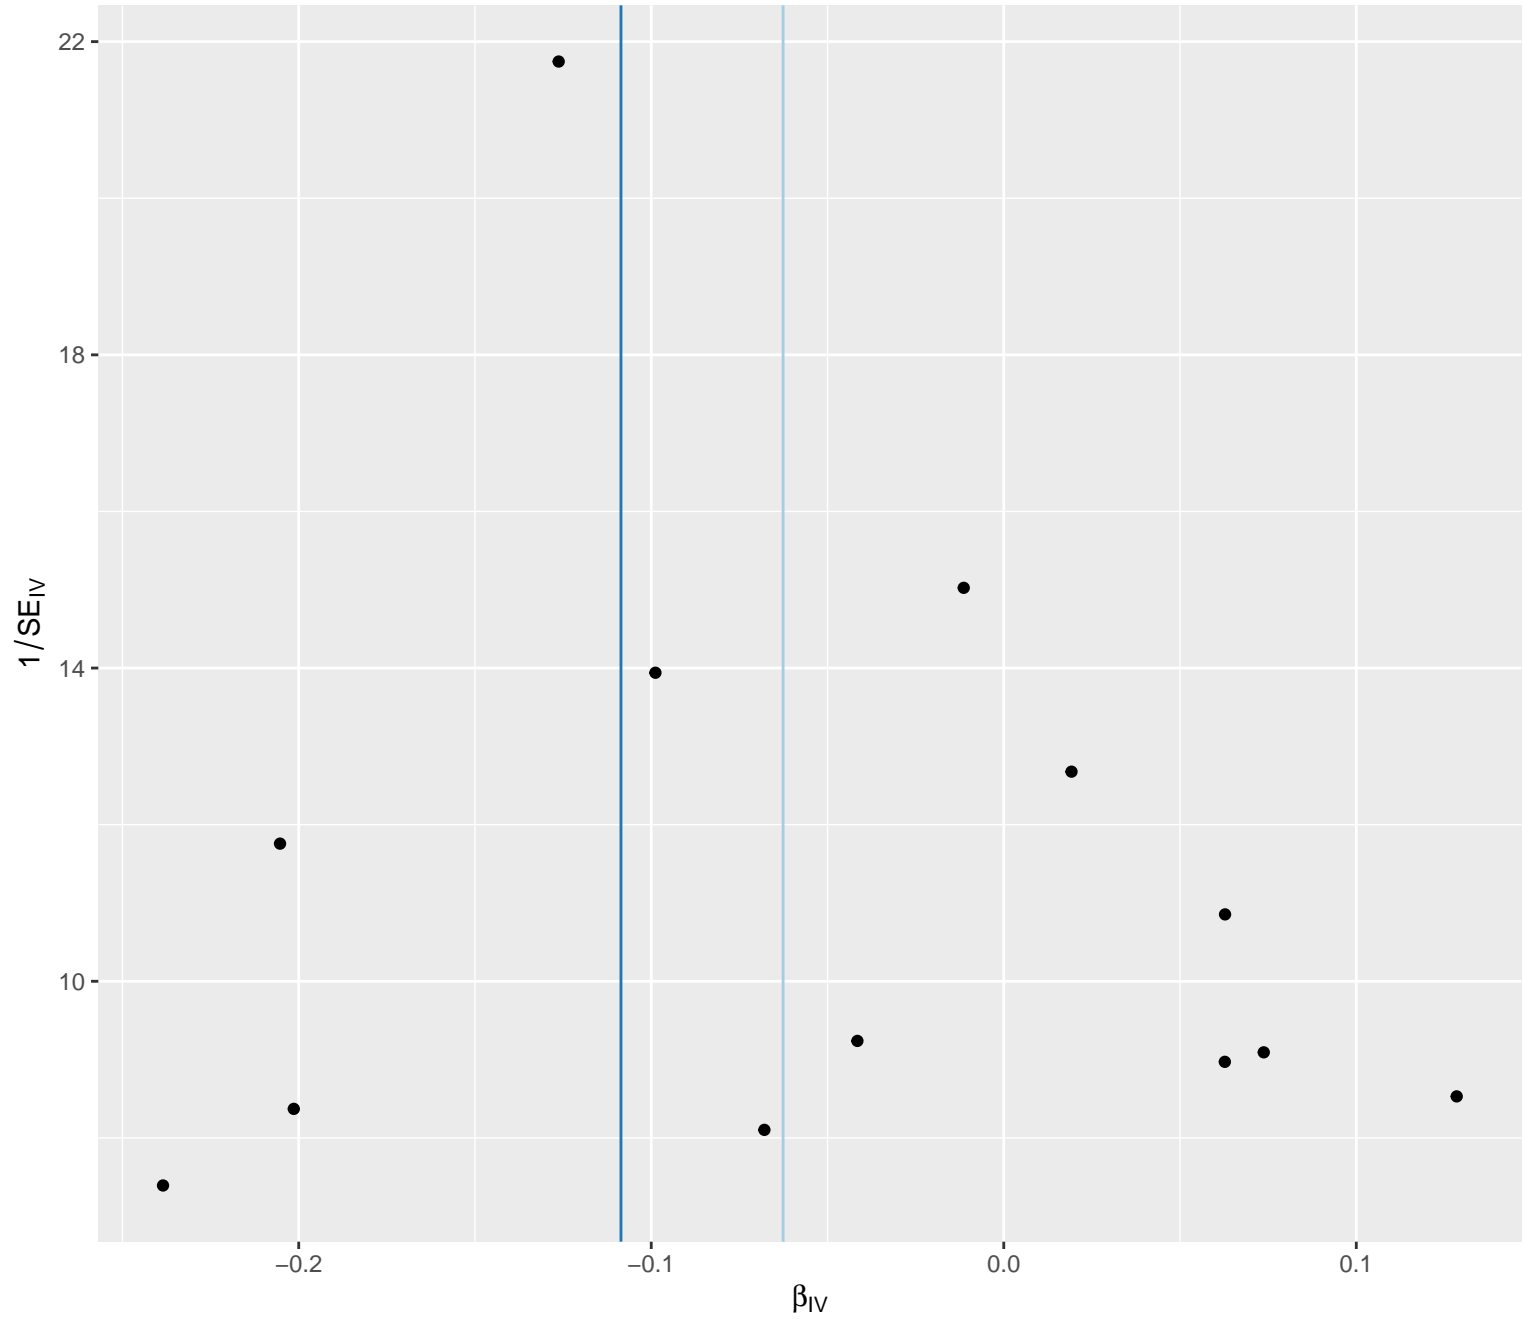



Funnel plot to assess heterogeneity between CD4/CD8br and overall breast cancer

### MR Method

- Inverse variance weighted
- MR Egger

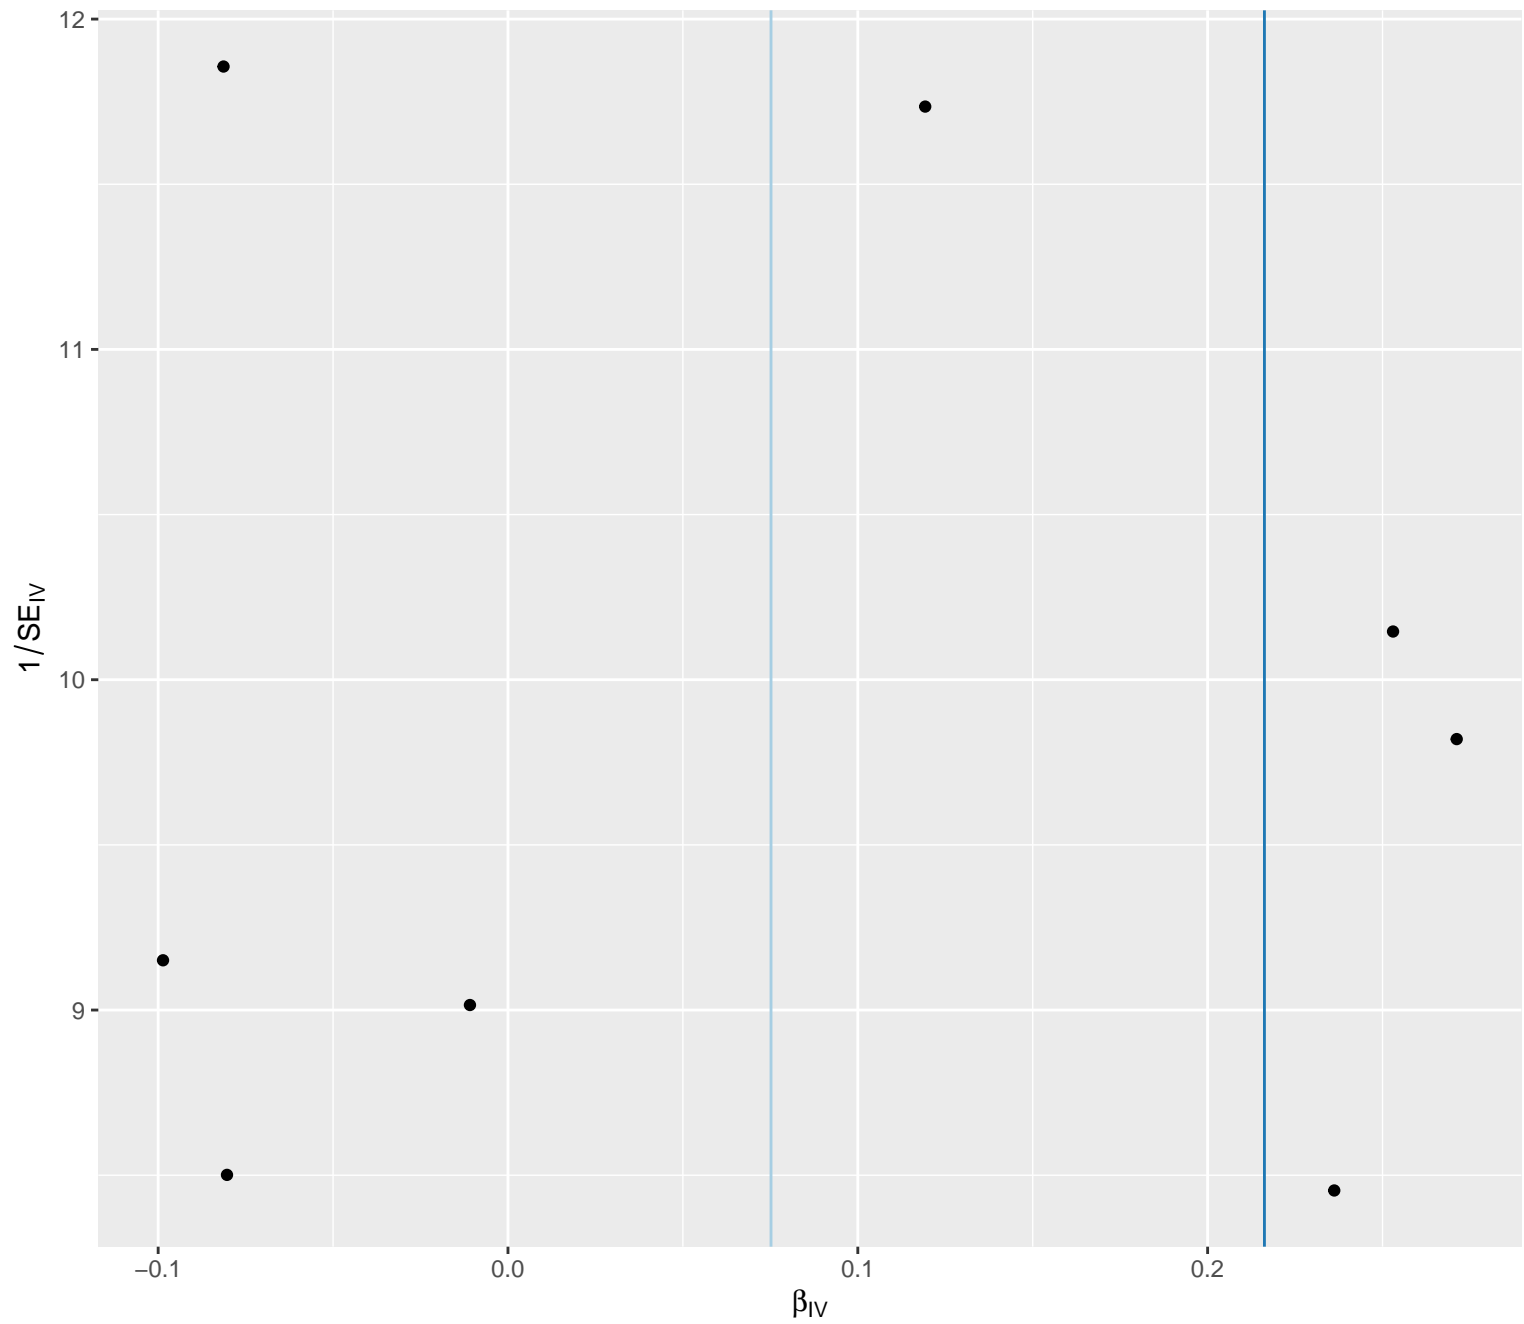

### MR Method

Funnel plot to assess heterogeneity between  
DP (CD4+CD8+) %leukocyte and overall breast cancer

- Inverse variance weighted
- MR Egger

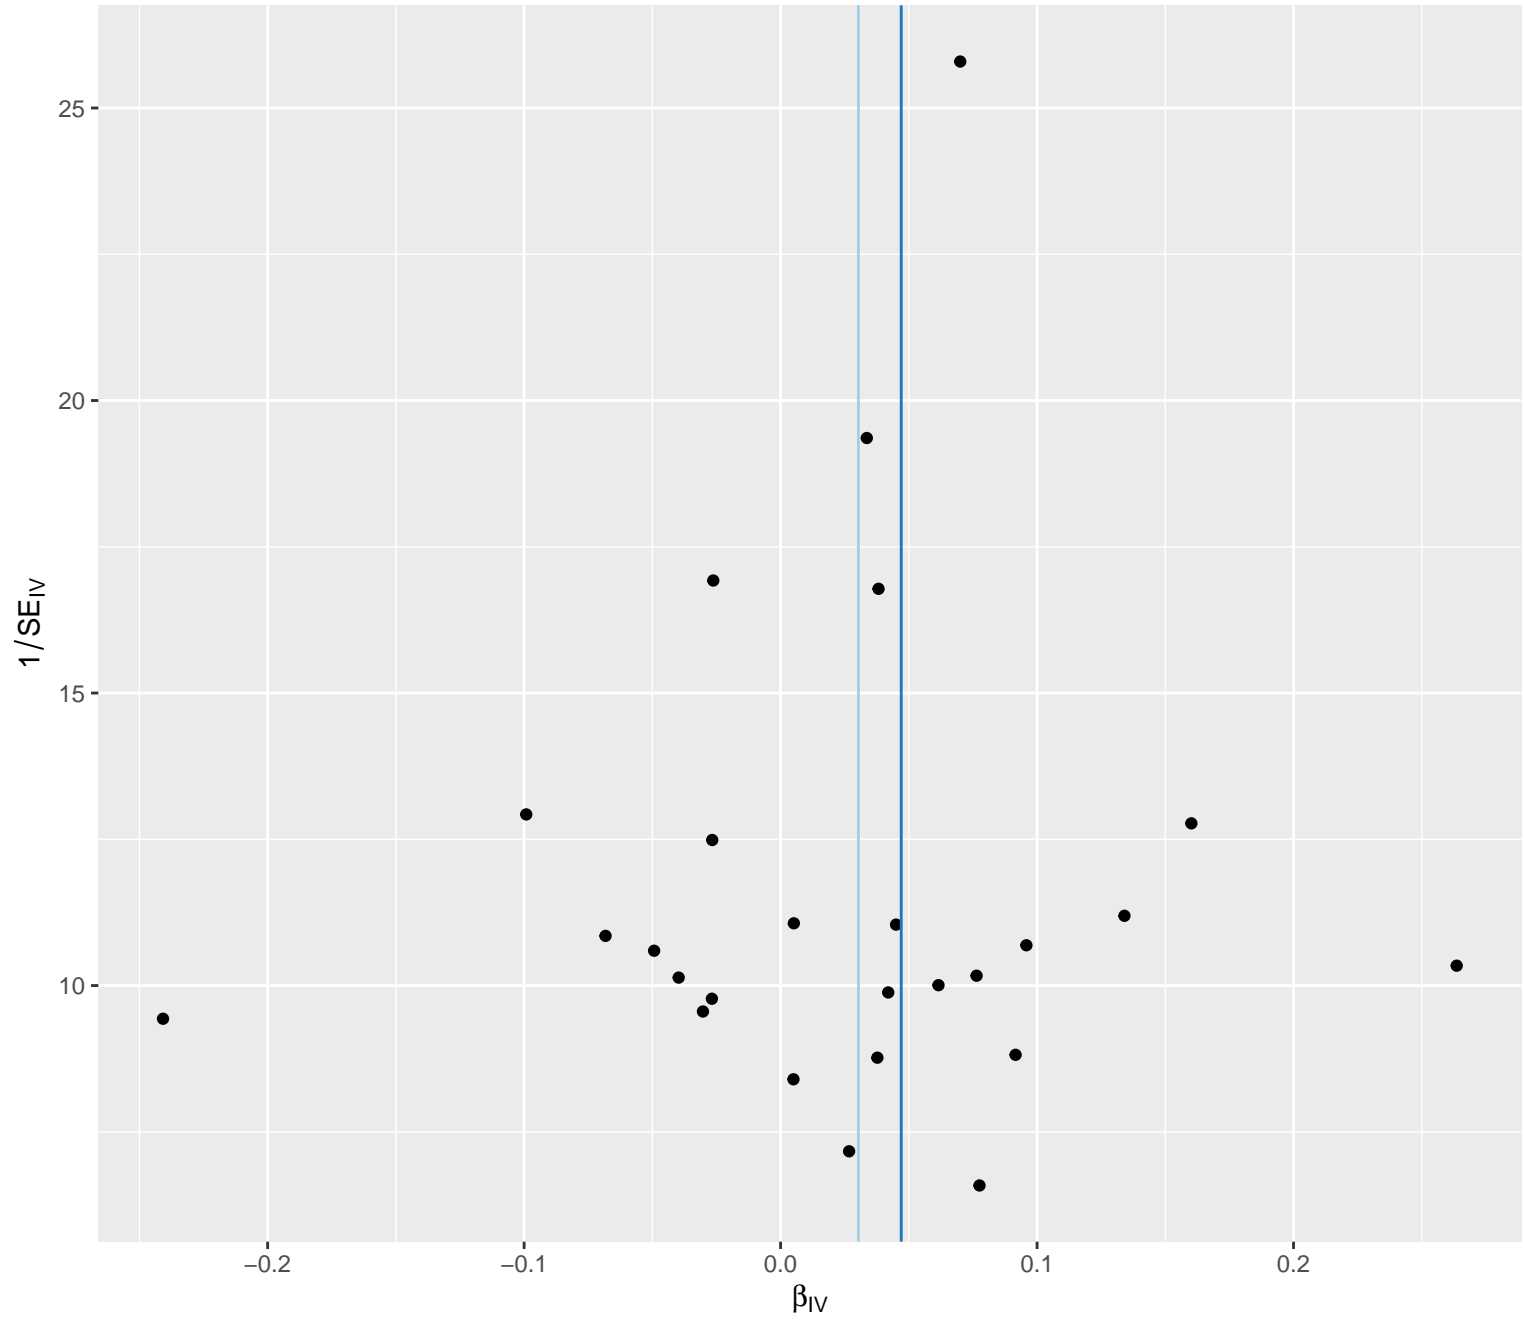

Funnel plot to assess heterogeneity between HLA DR+ CD8br AC and overall breast cancer

MR Method

- Inverse variance weighted
- MR Egger

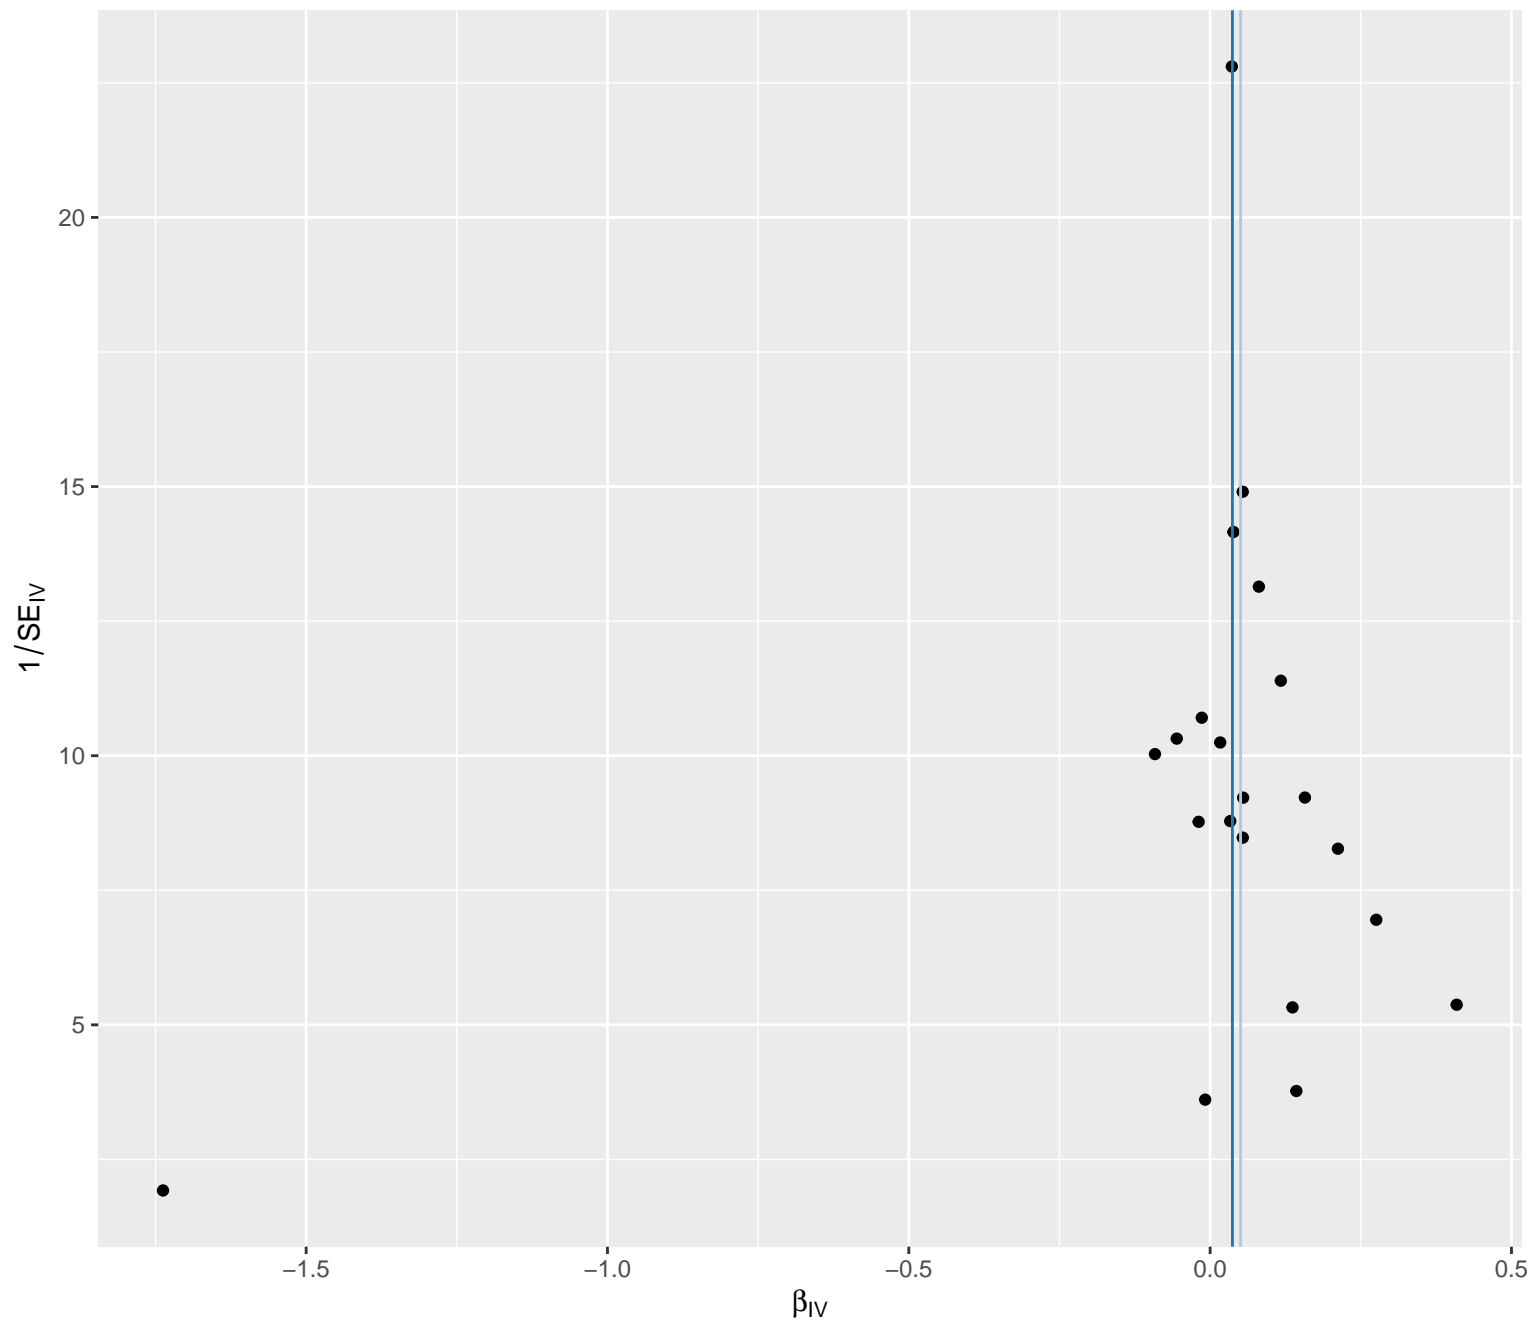

### MR Method

- Inverse variance weighted
- MR Egger

Funnel plot to assess heterogeneity between CD28+ CD45RA+ CD8dim AC and overall breast cancer

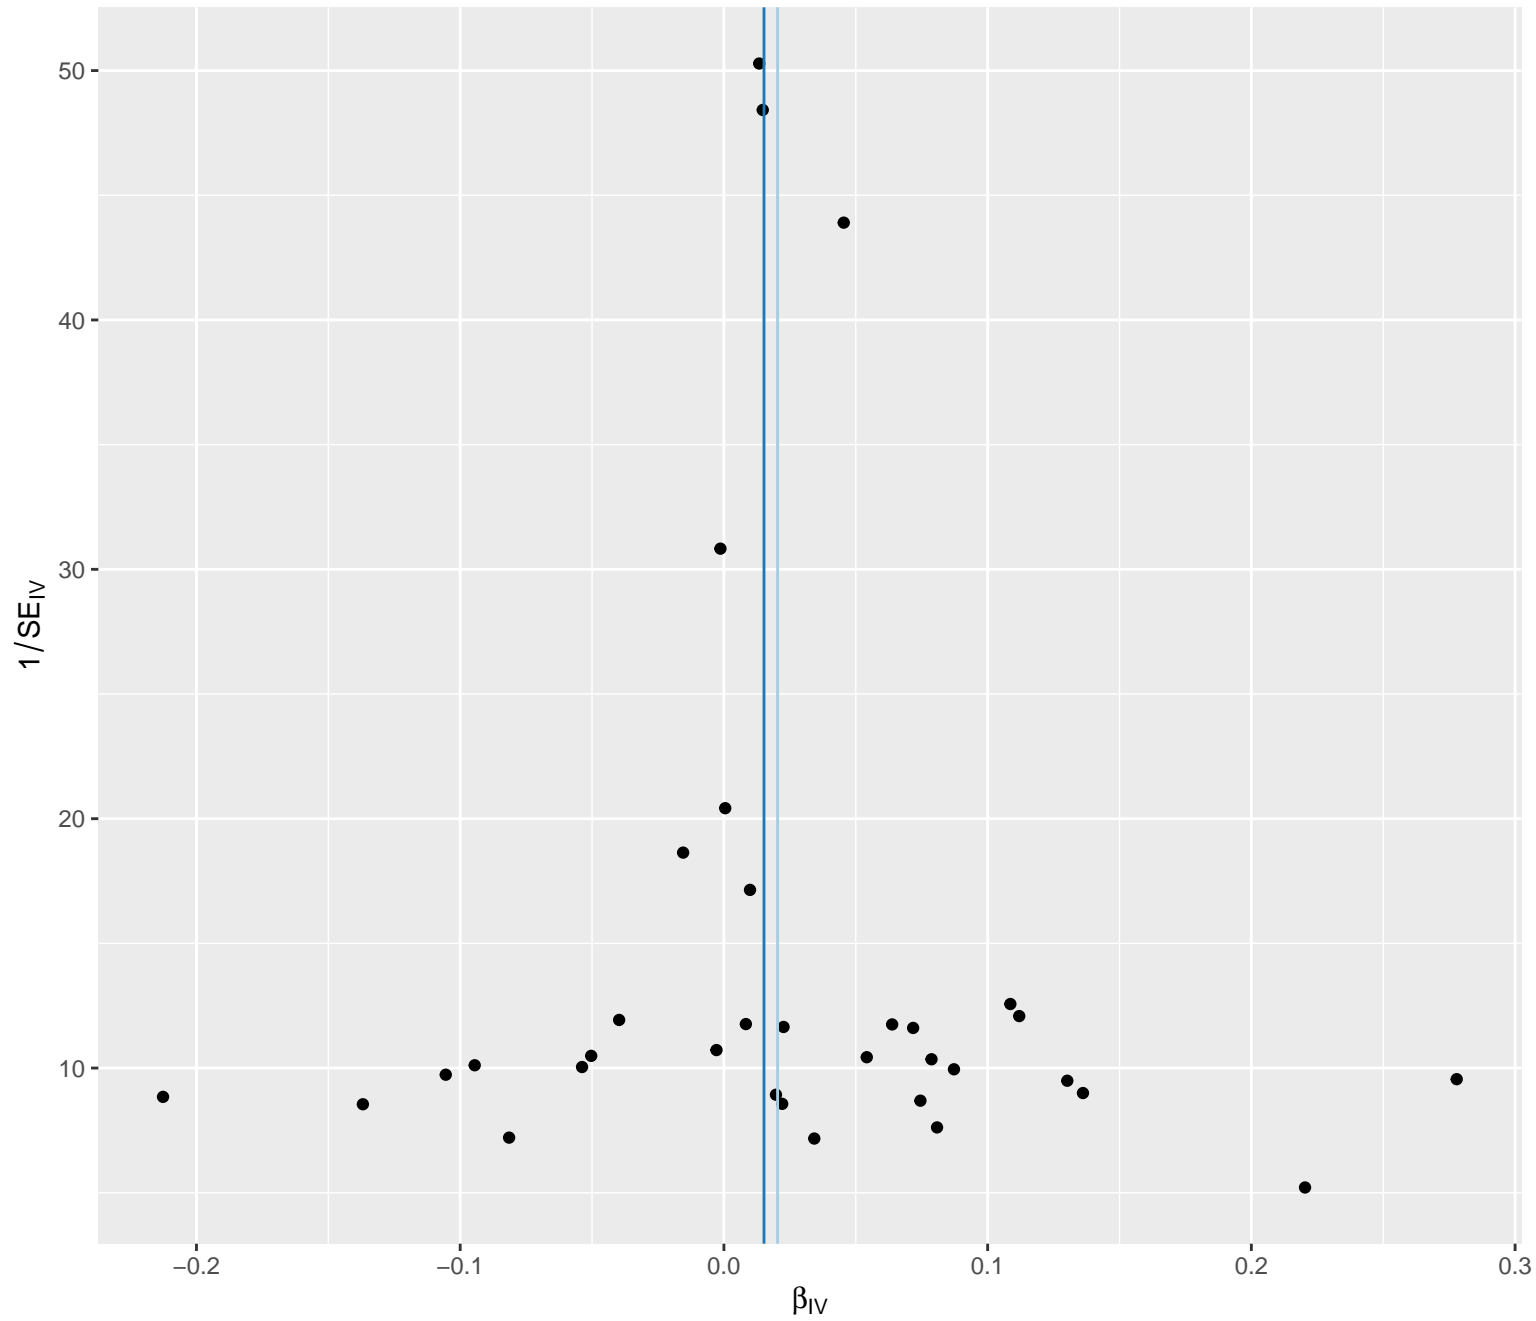

### MR Method

Funnel plot to assess heterogeneity between  
CD28- CD25++ CD8br %T cell  
and overall breast cancer

- Inverse variance weighted
- MR Egger

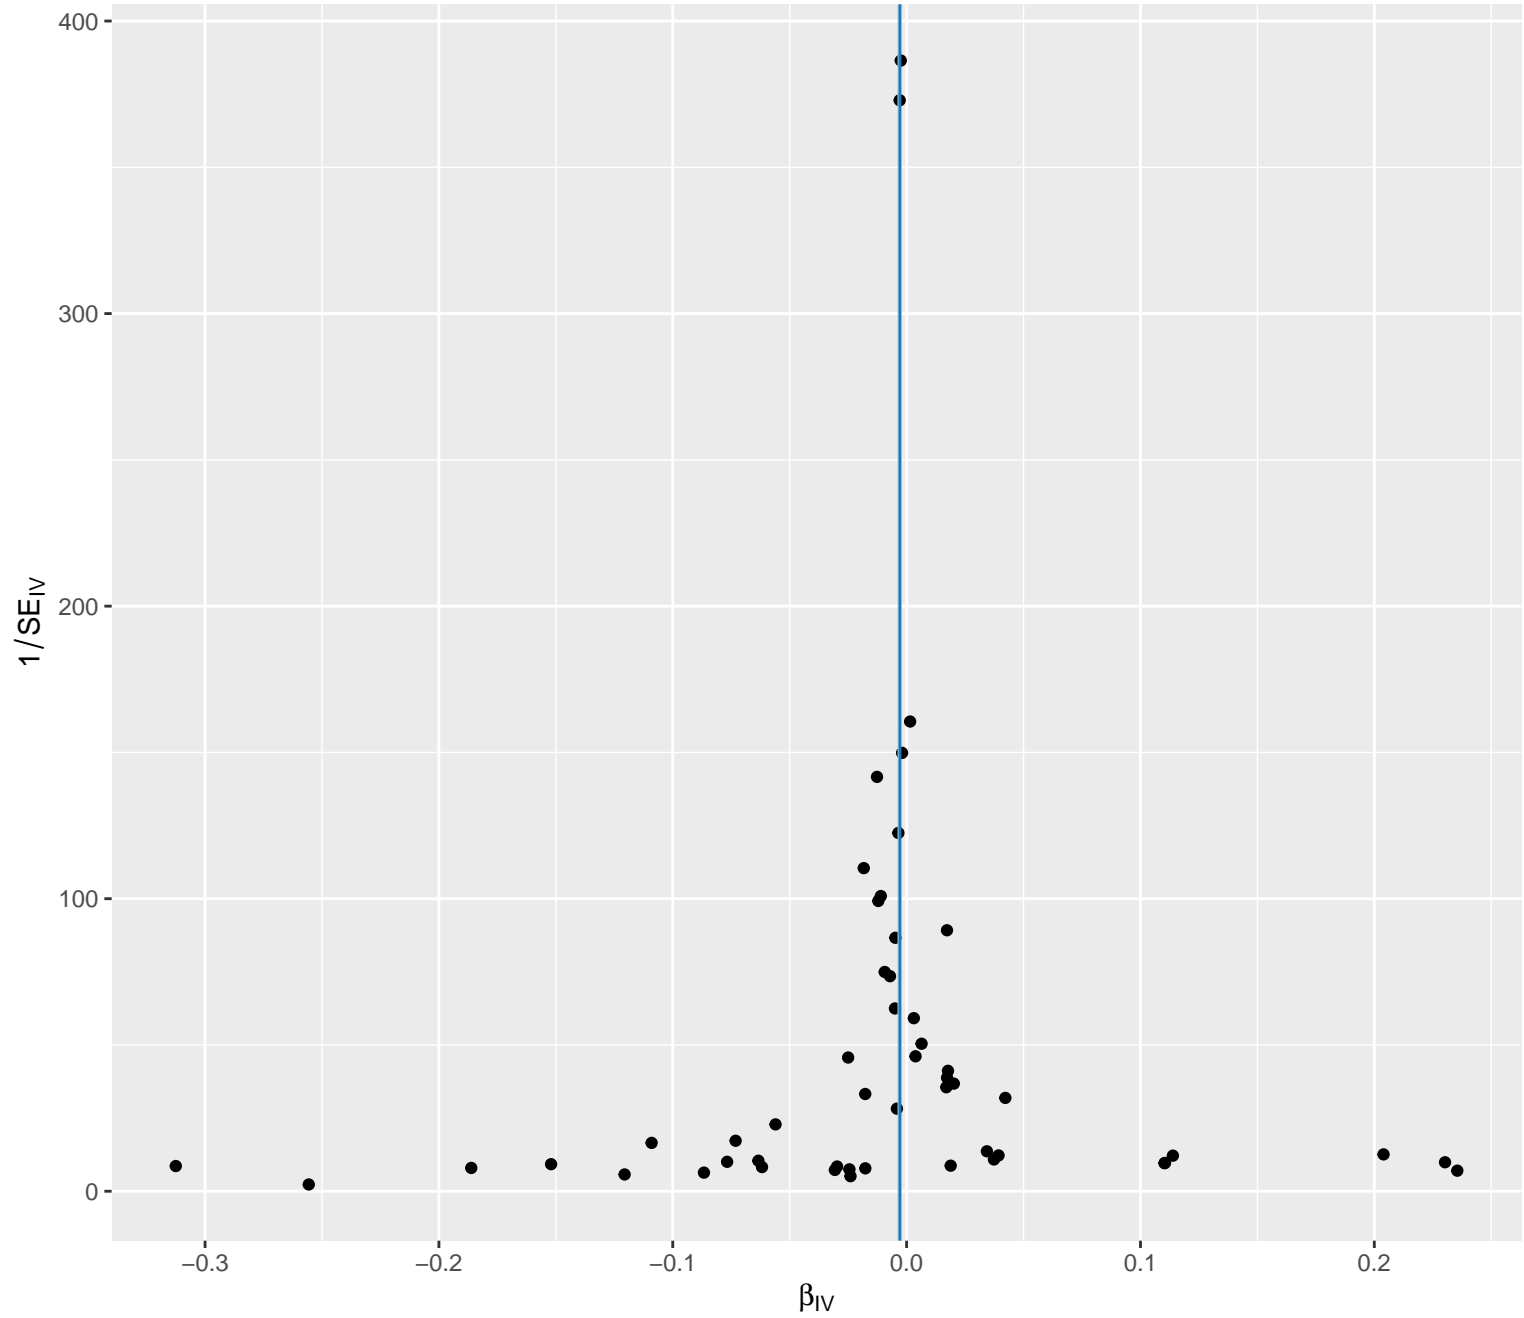

Funnel plot to assess heterogeneity between  
CD28+ CD45RA+ CD8br %T cell  
and overall breast cancer

### MR Method

- Inverse variance weighted
- MR Egger

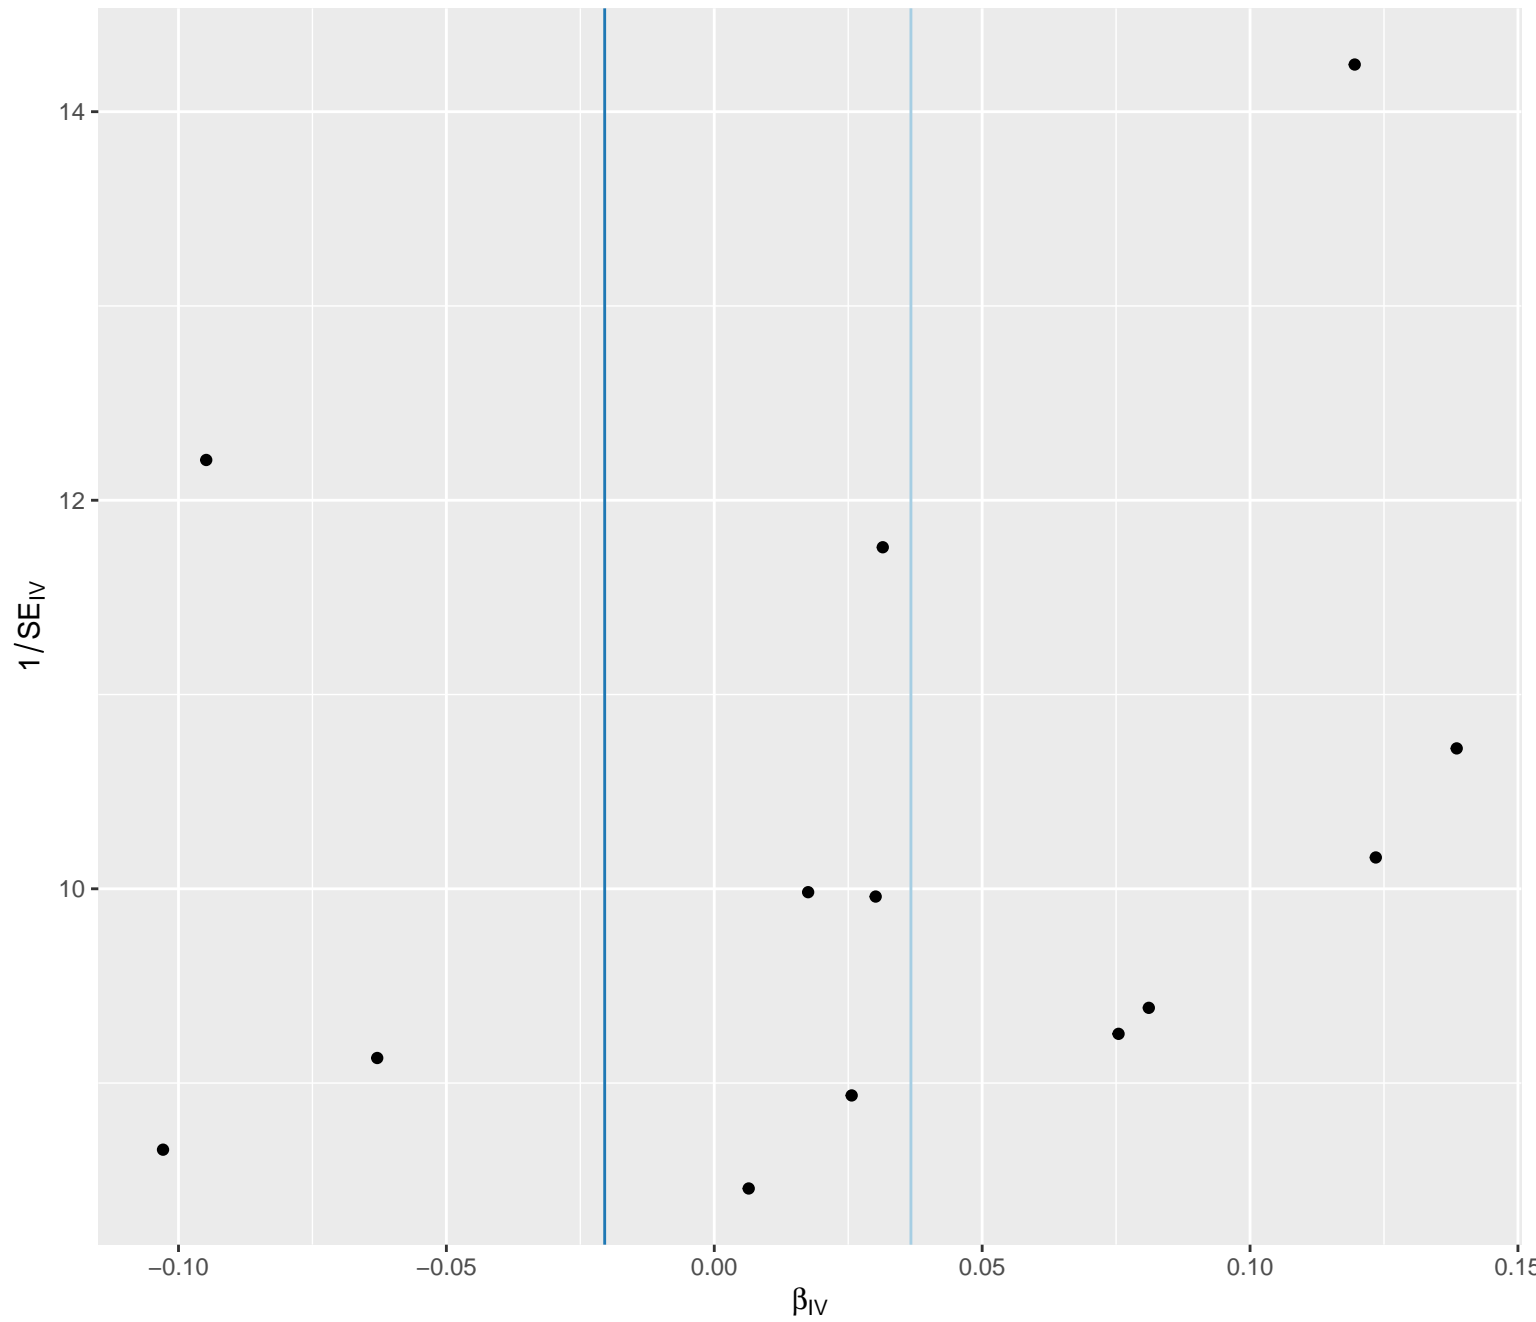

### MR Method

Funnel plot to assess heterogeneity between  
CD3 on CD28+ DN (CD4-CD8-) and overall breast cancer

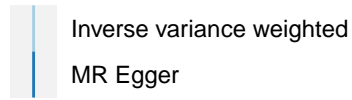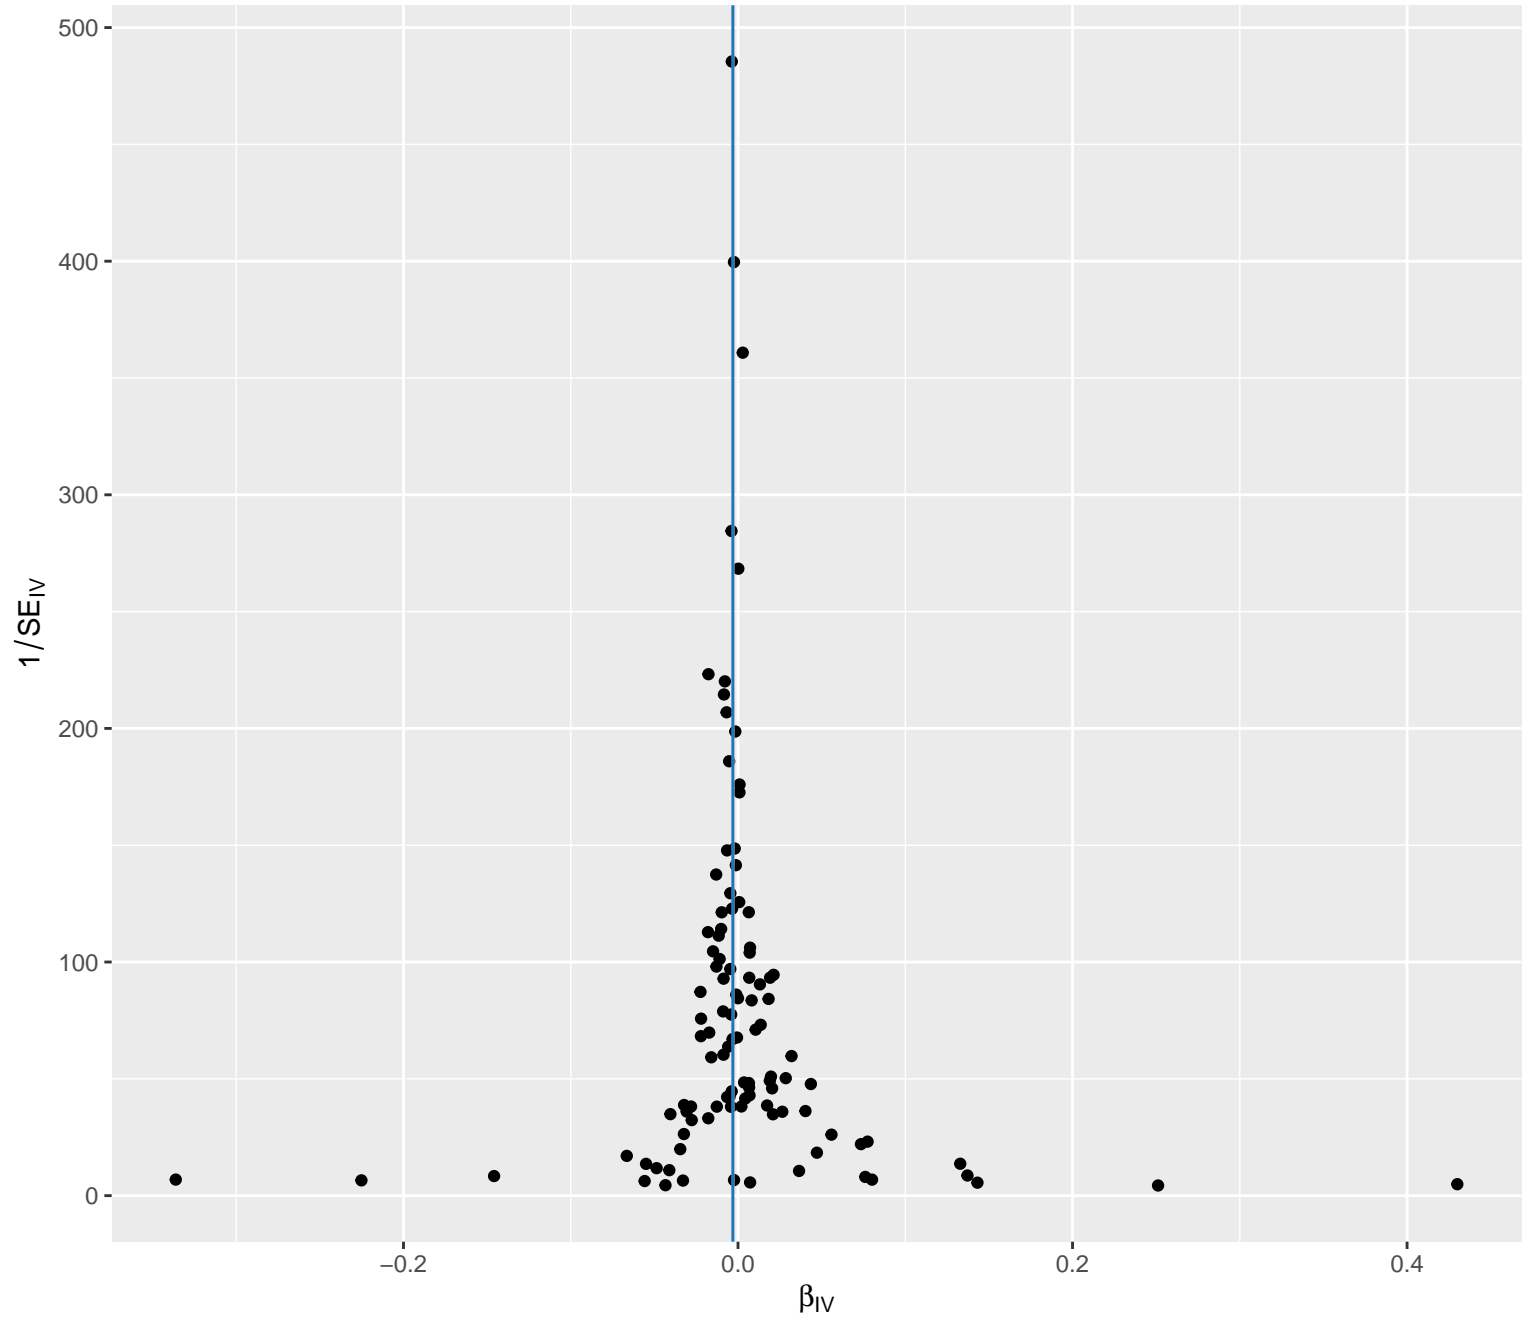

Funnel plot to assess heterogeneity between HVEM on T cell and overall breast cancer

MR Method

- Inverse variance weighted
- MR Egger

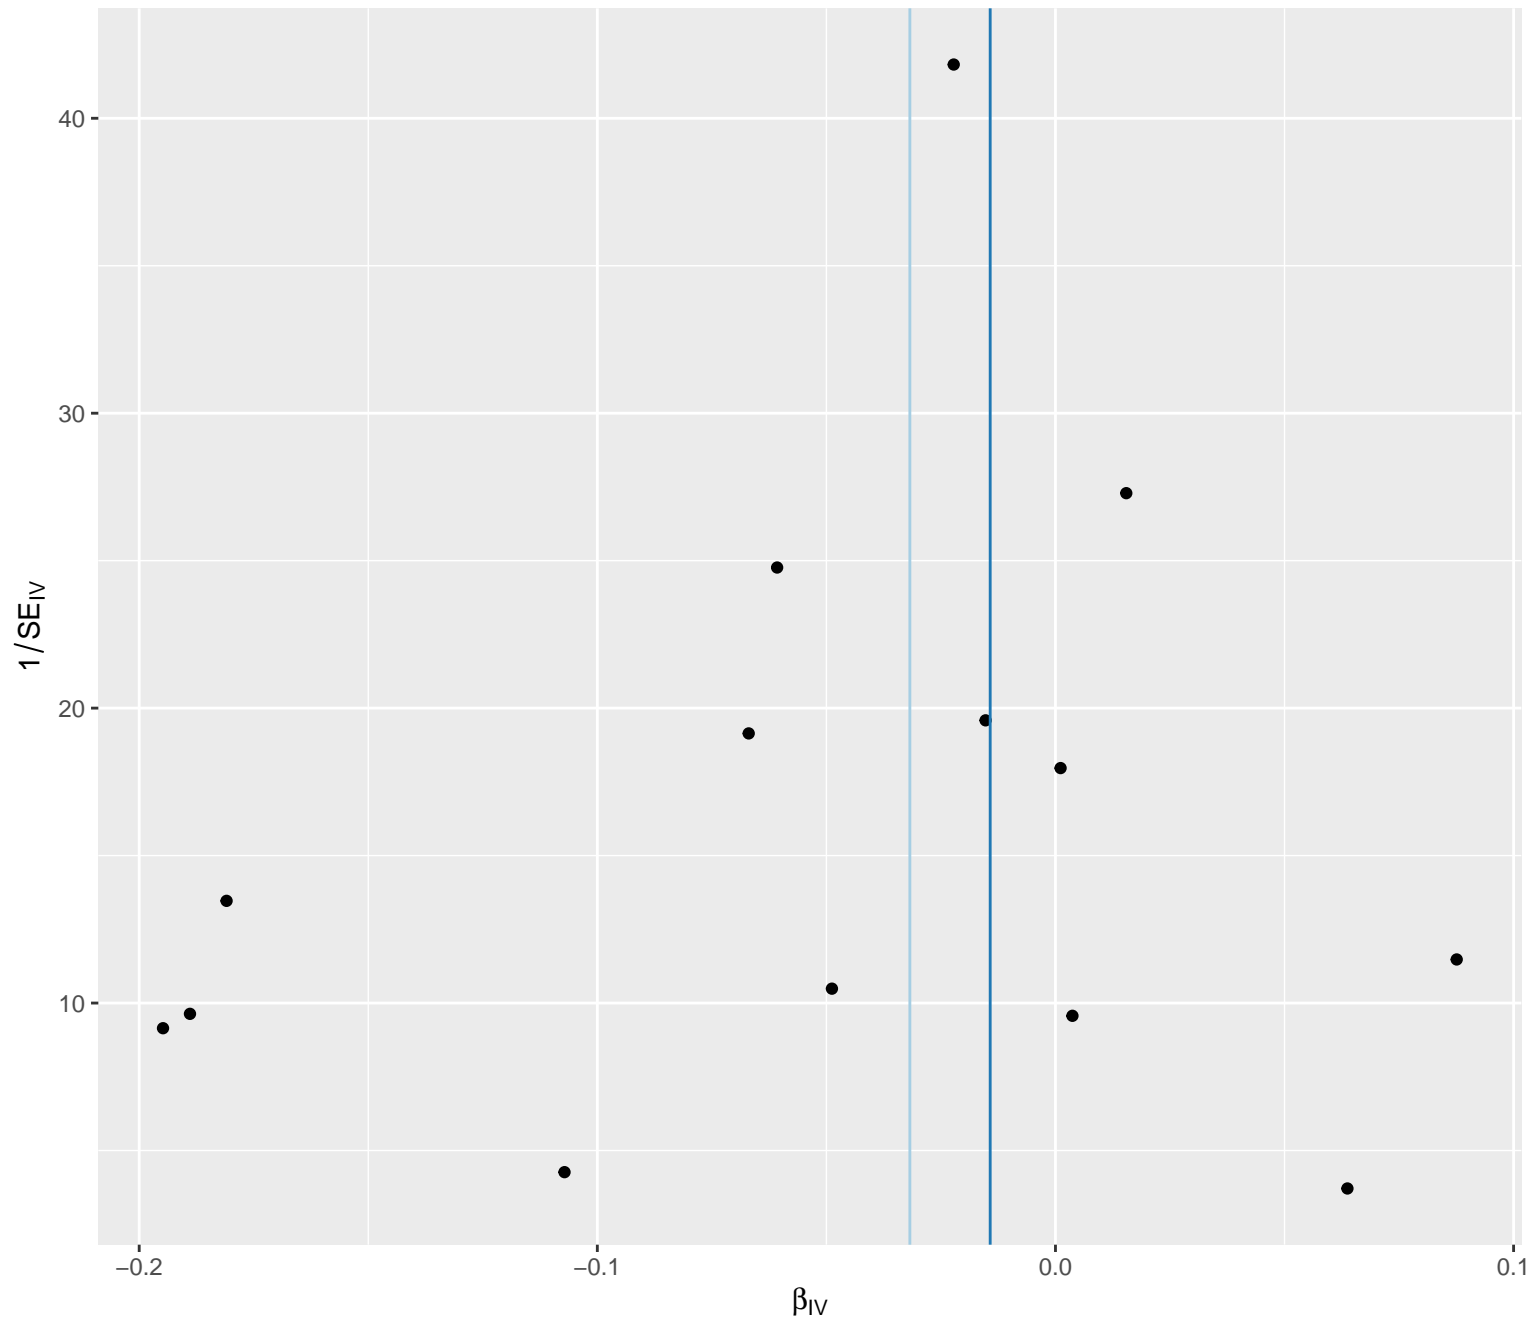



Funnel plot to assess heterogeneity between  
CD45 on CD4+ and overall breast cancer

MR Method

- Inverse variance weighted
- MR Egger

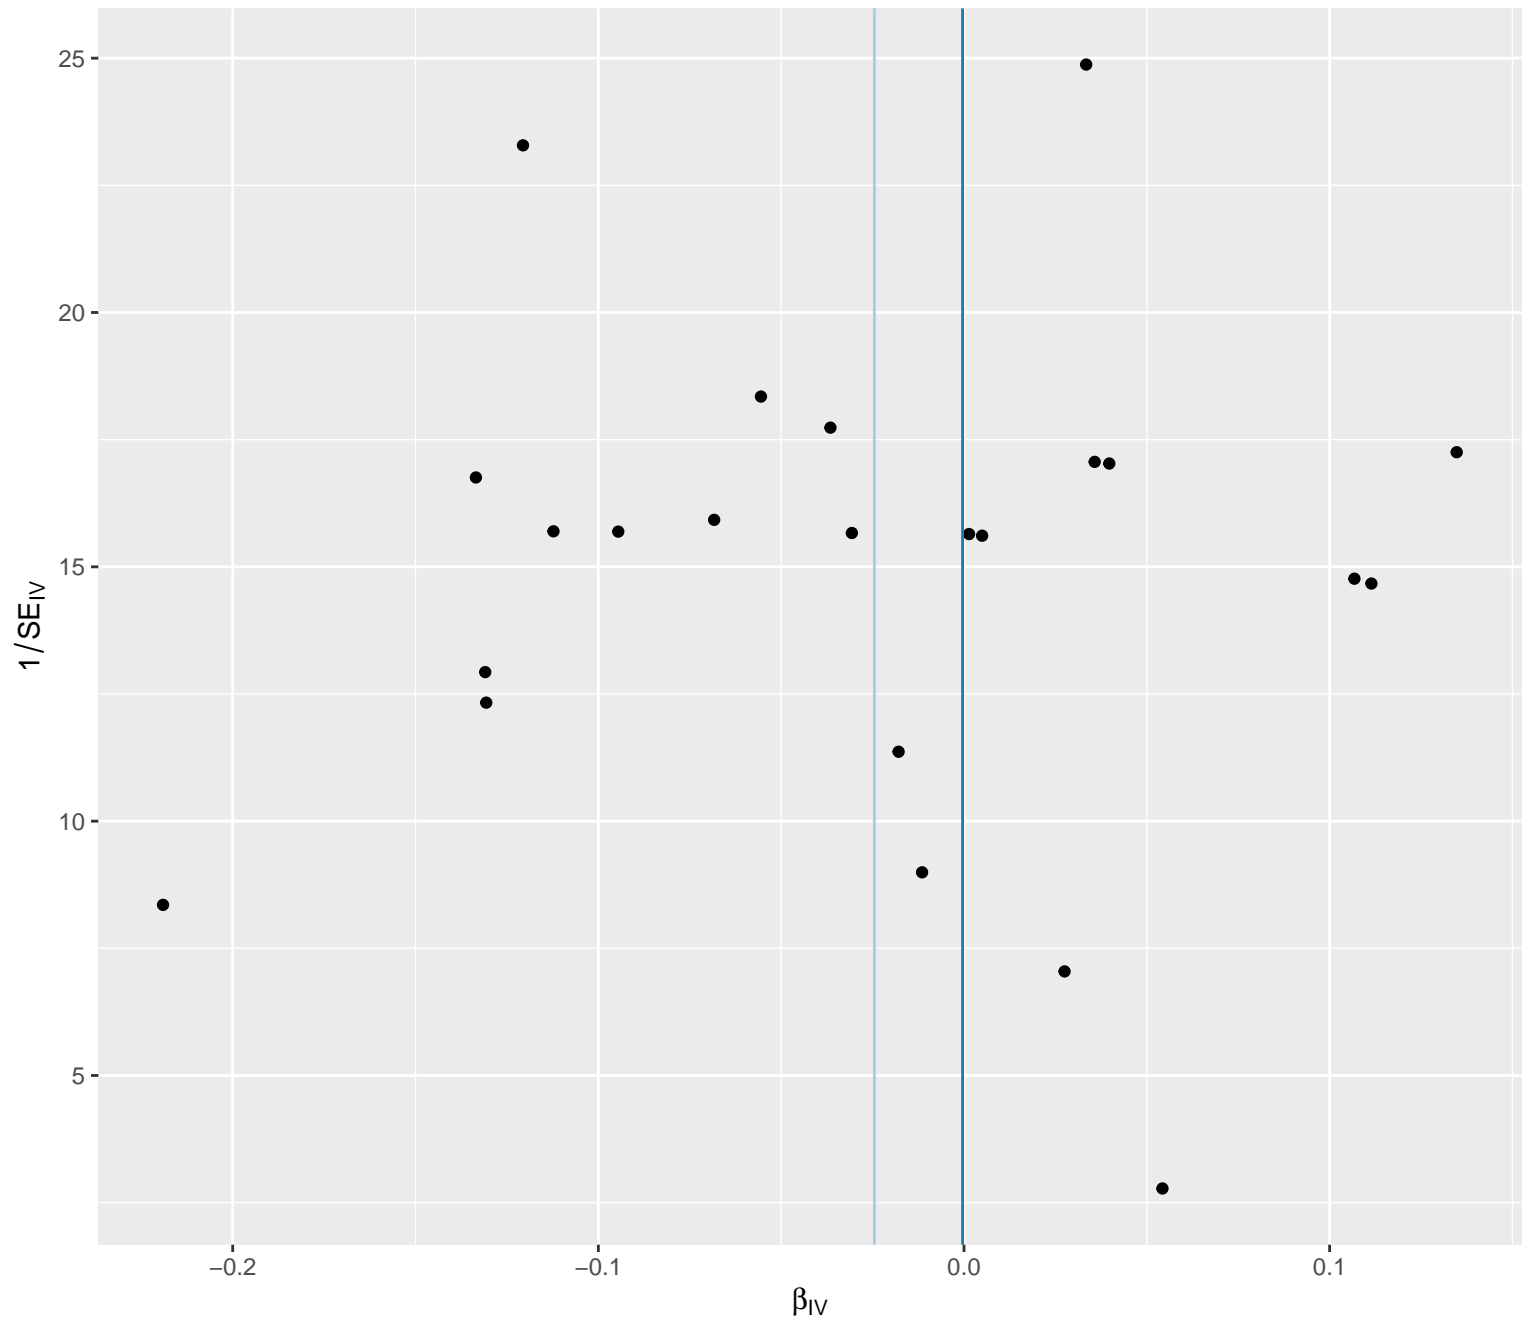

Funnel plot to assess heterogeneity between HLA DR on CD14+ CD16- monocyte and overall breast cancer

### MR Method

- Inverse variance weighted
- MR Egger

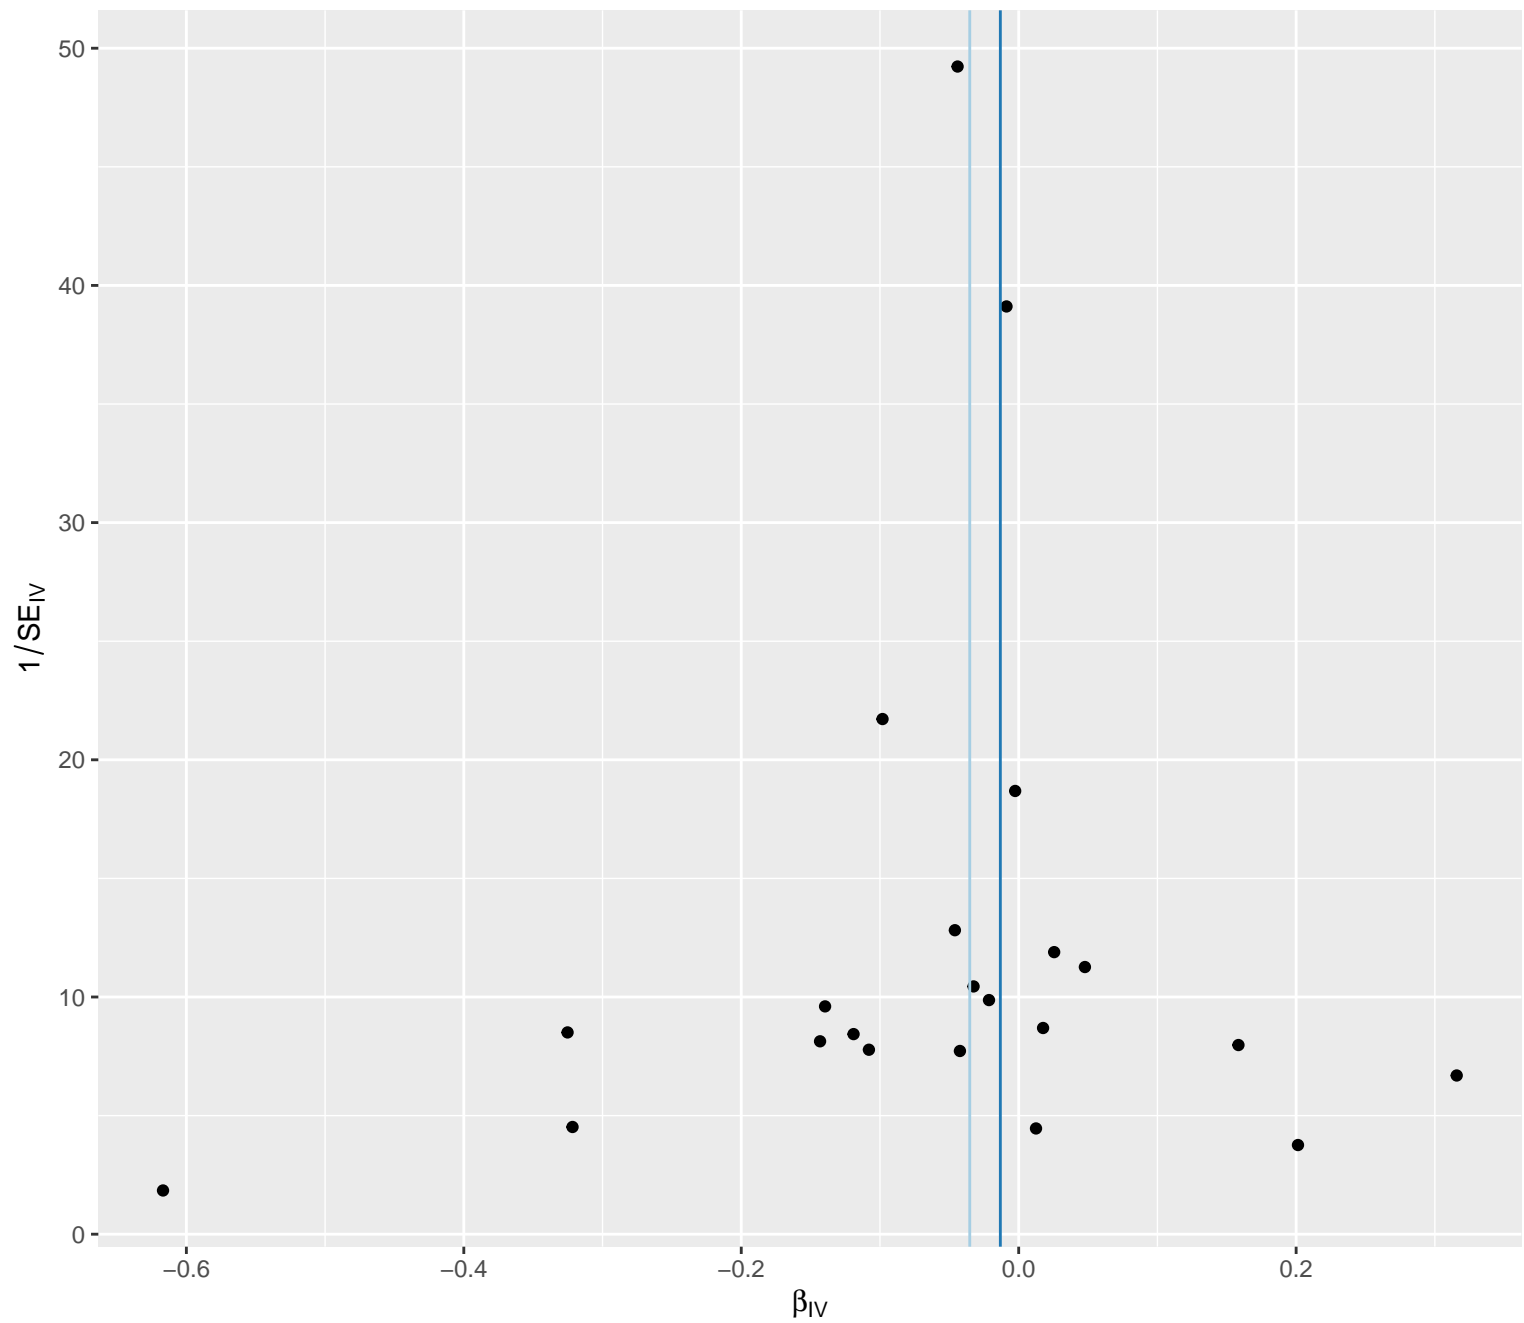

Funnel plot to assess heterogeneity between CCR2 on CD62L+ myeloid DC and overall breast cancer

MR Method

- Inverse variance weighted
- MR Egger

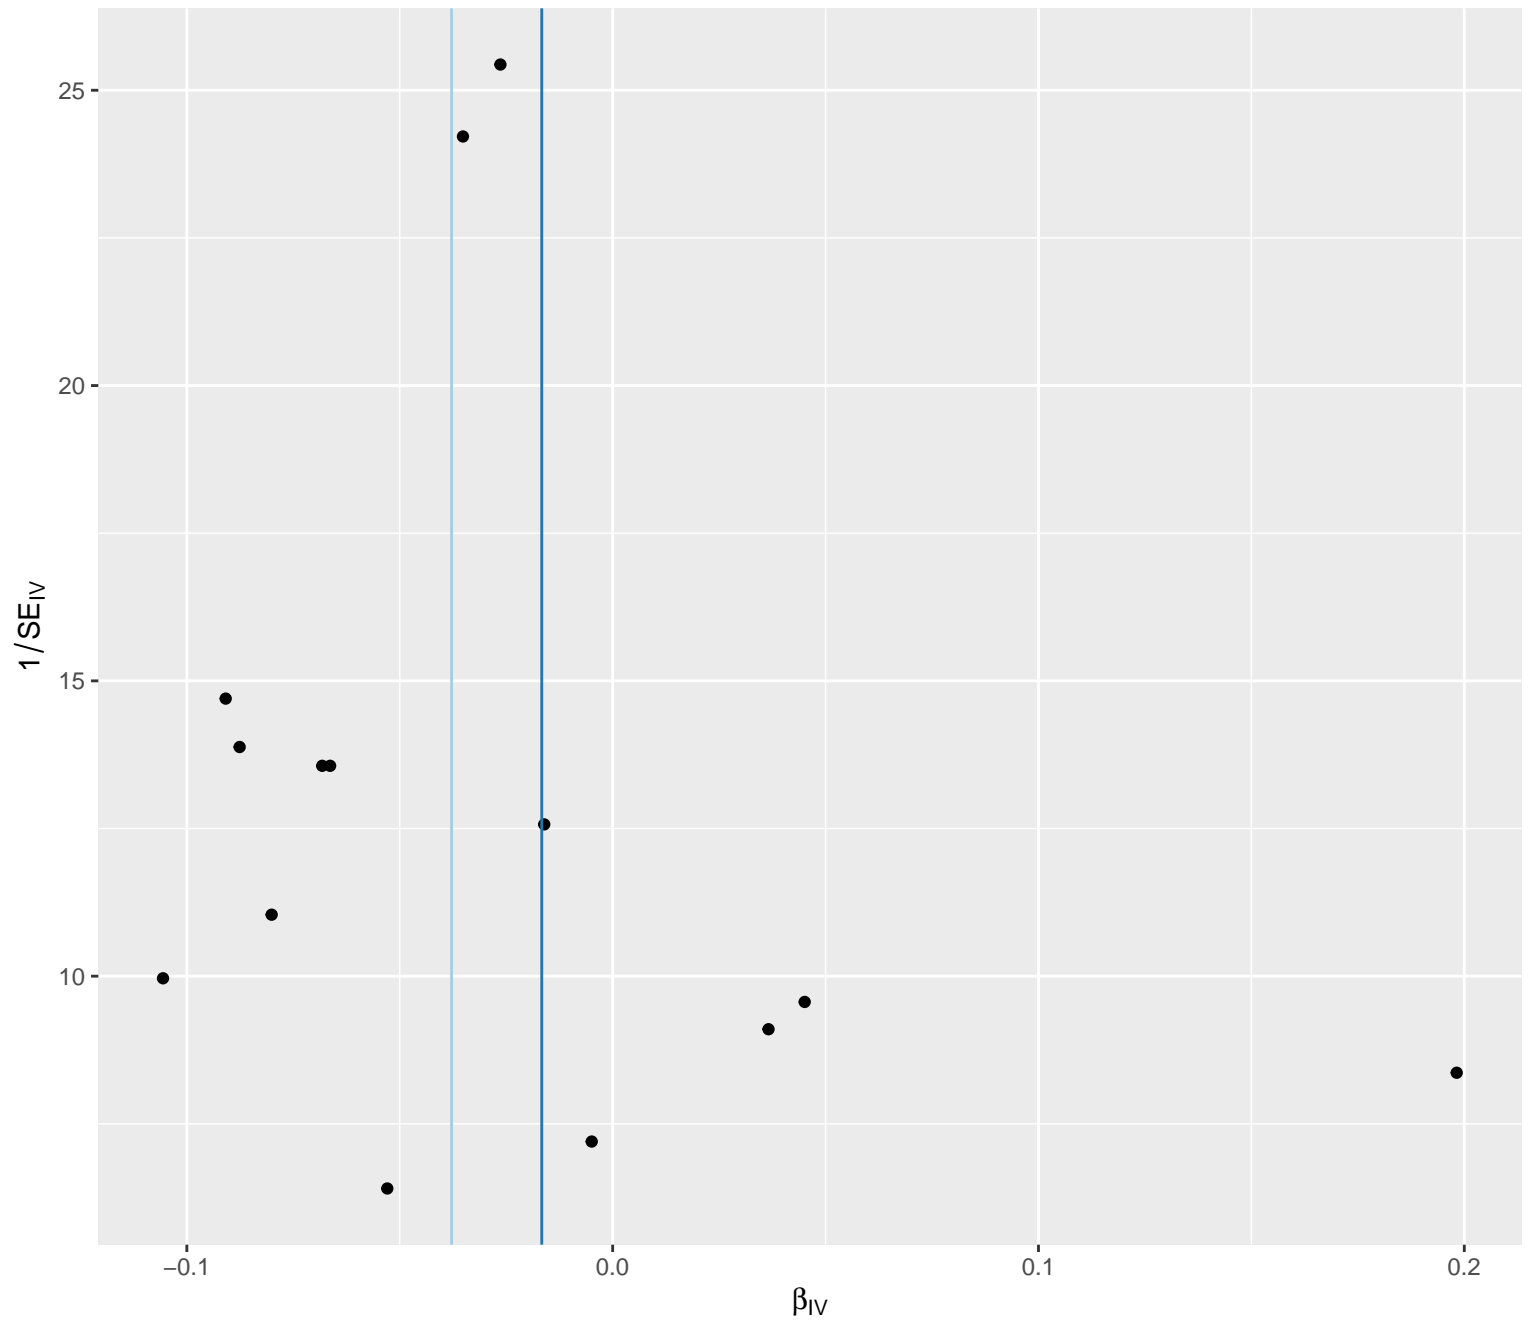

Funnel plot to assess heterogeneity between IgD+ AC and ER+ breast cancer

MR Method

- Inverse variance weighted
- MR Egger

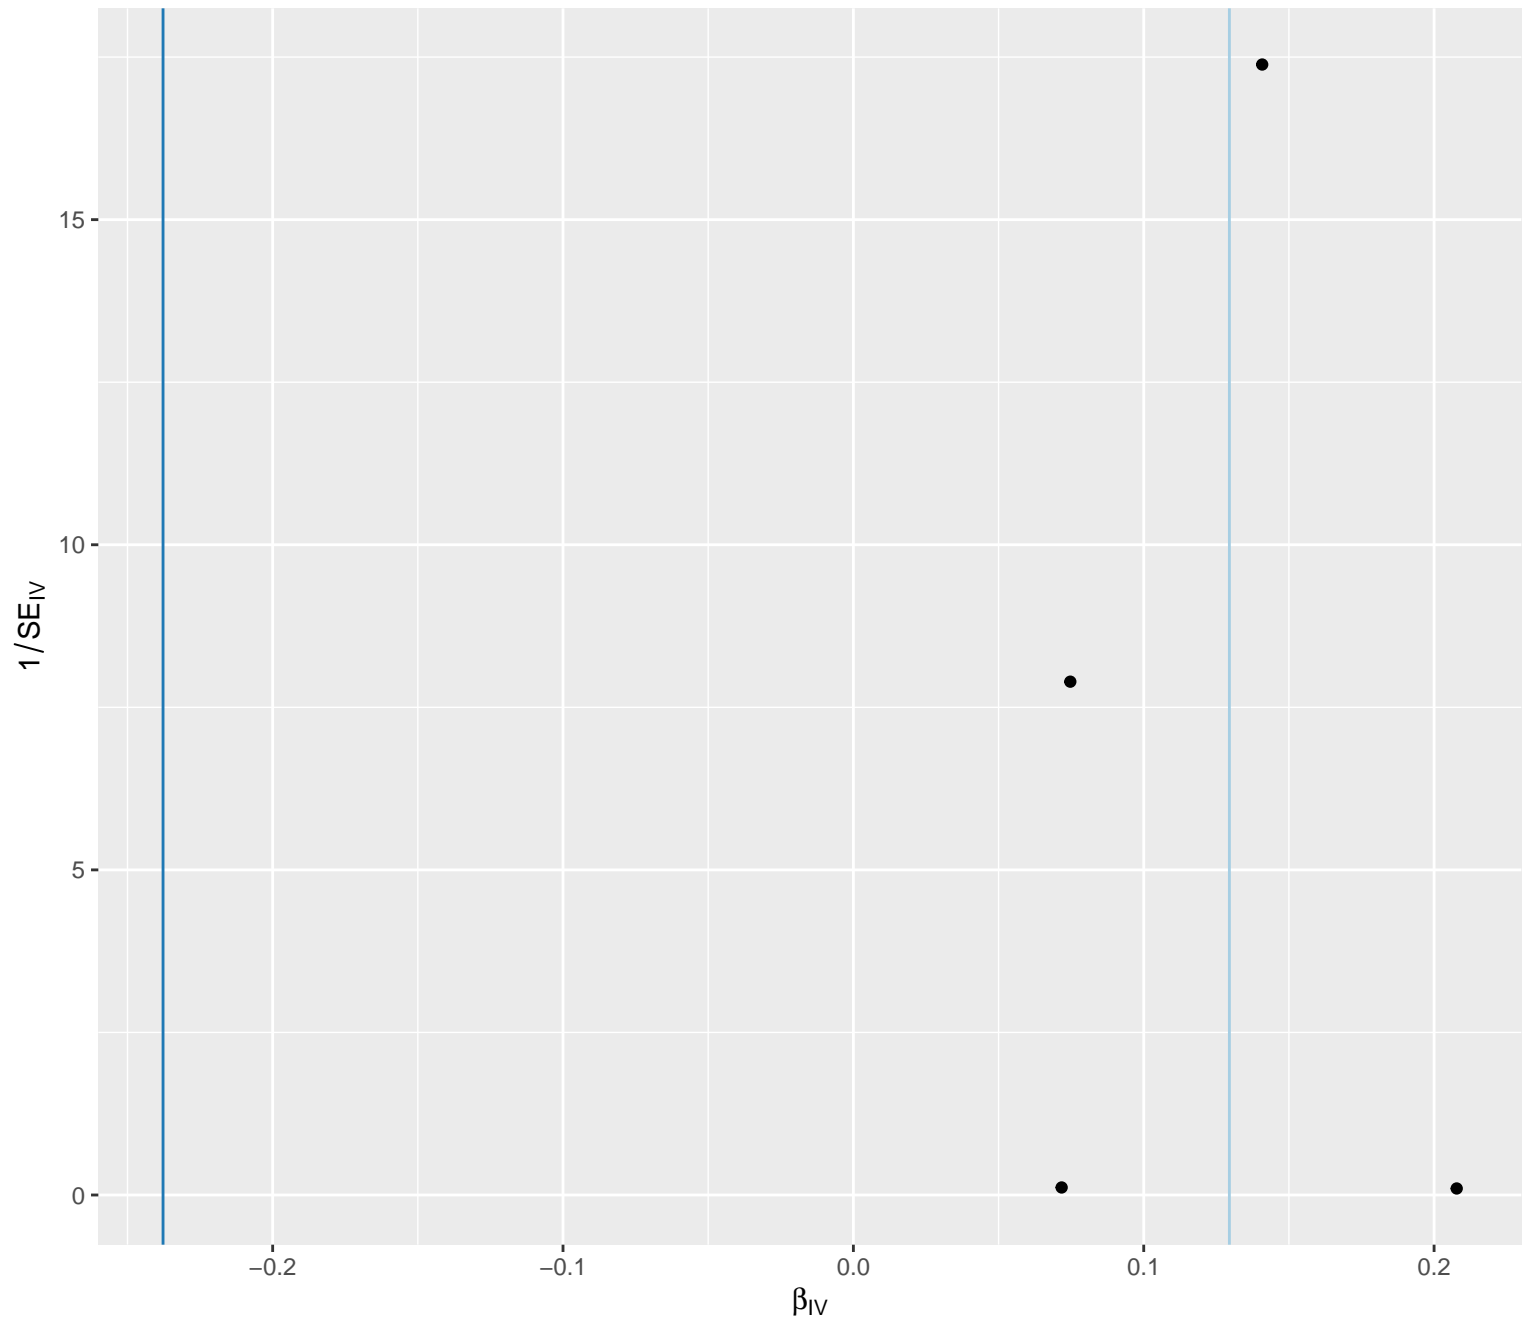

Funnel plot to assess heterogeneity between  
IgD- CD27- AC and ER- breast cancer

MR Method

- Inverse variance weighted
- MR Egger

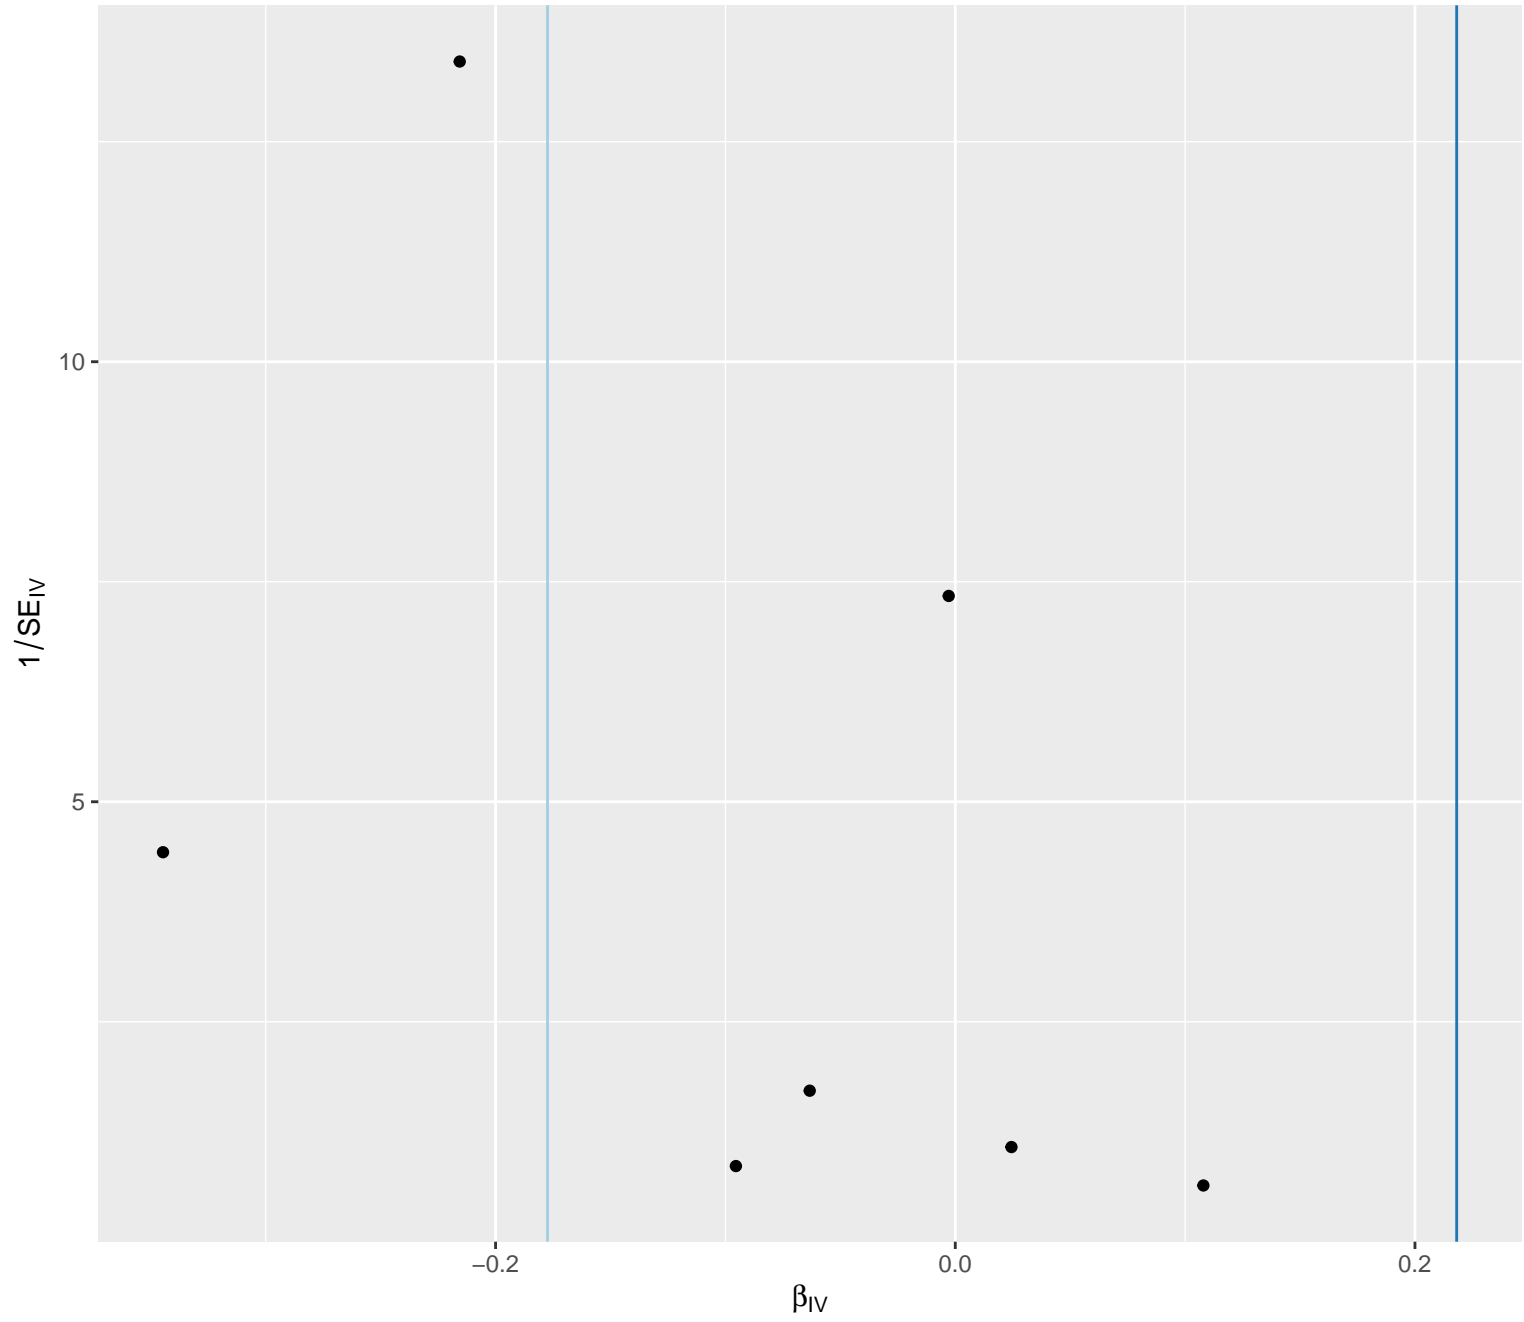

Funnel plot to assess heterogeneity between Naive-mature B cell AC and ER+ breast cancer

### MR Method

- Inverse variance weighted
- MR Egger

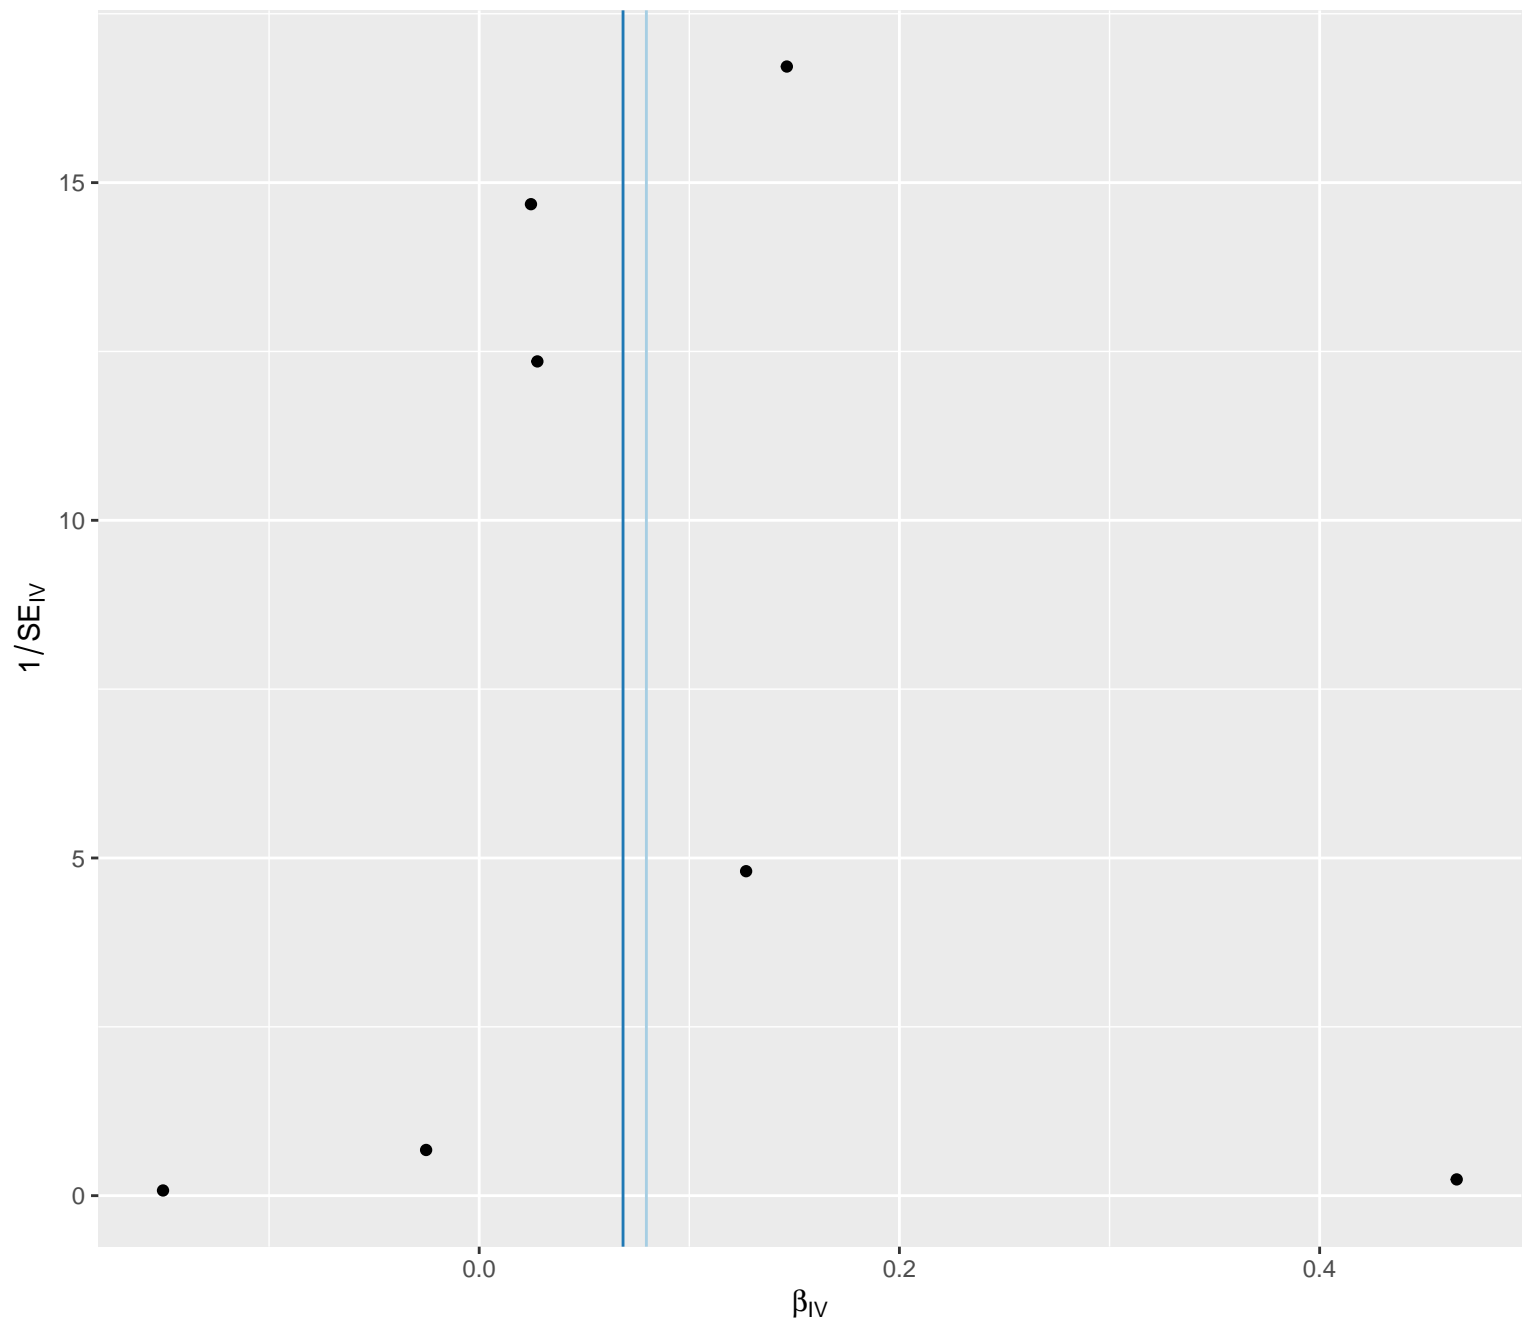

Funnel plot to assess heterogeneity between Myeloid DC AC and ER+ breast cancer

MR Method

- Inverse variance weighted
- MR Egger

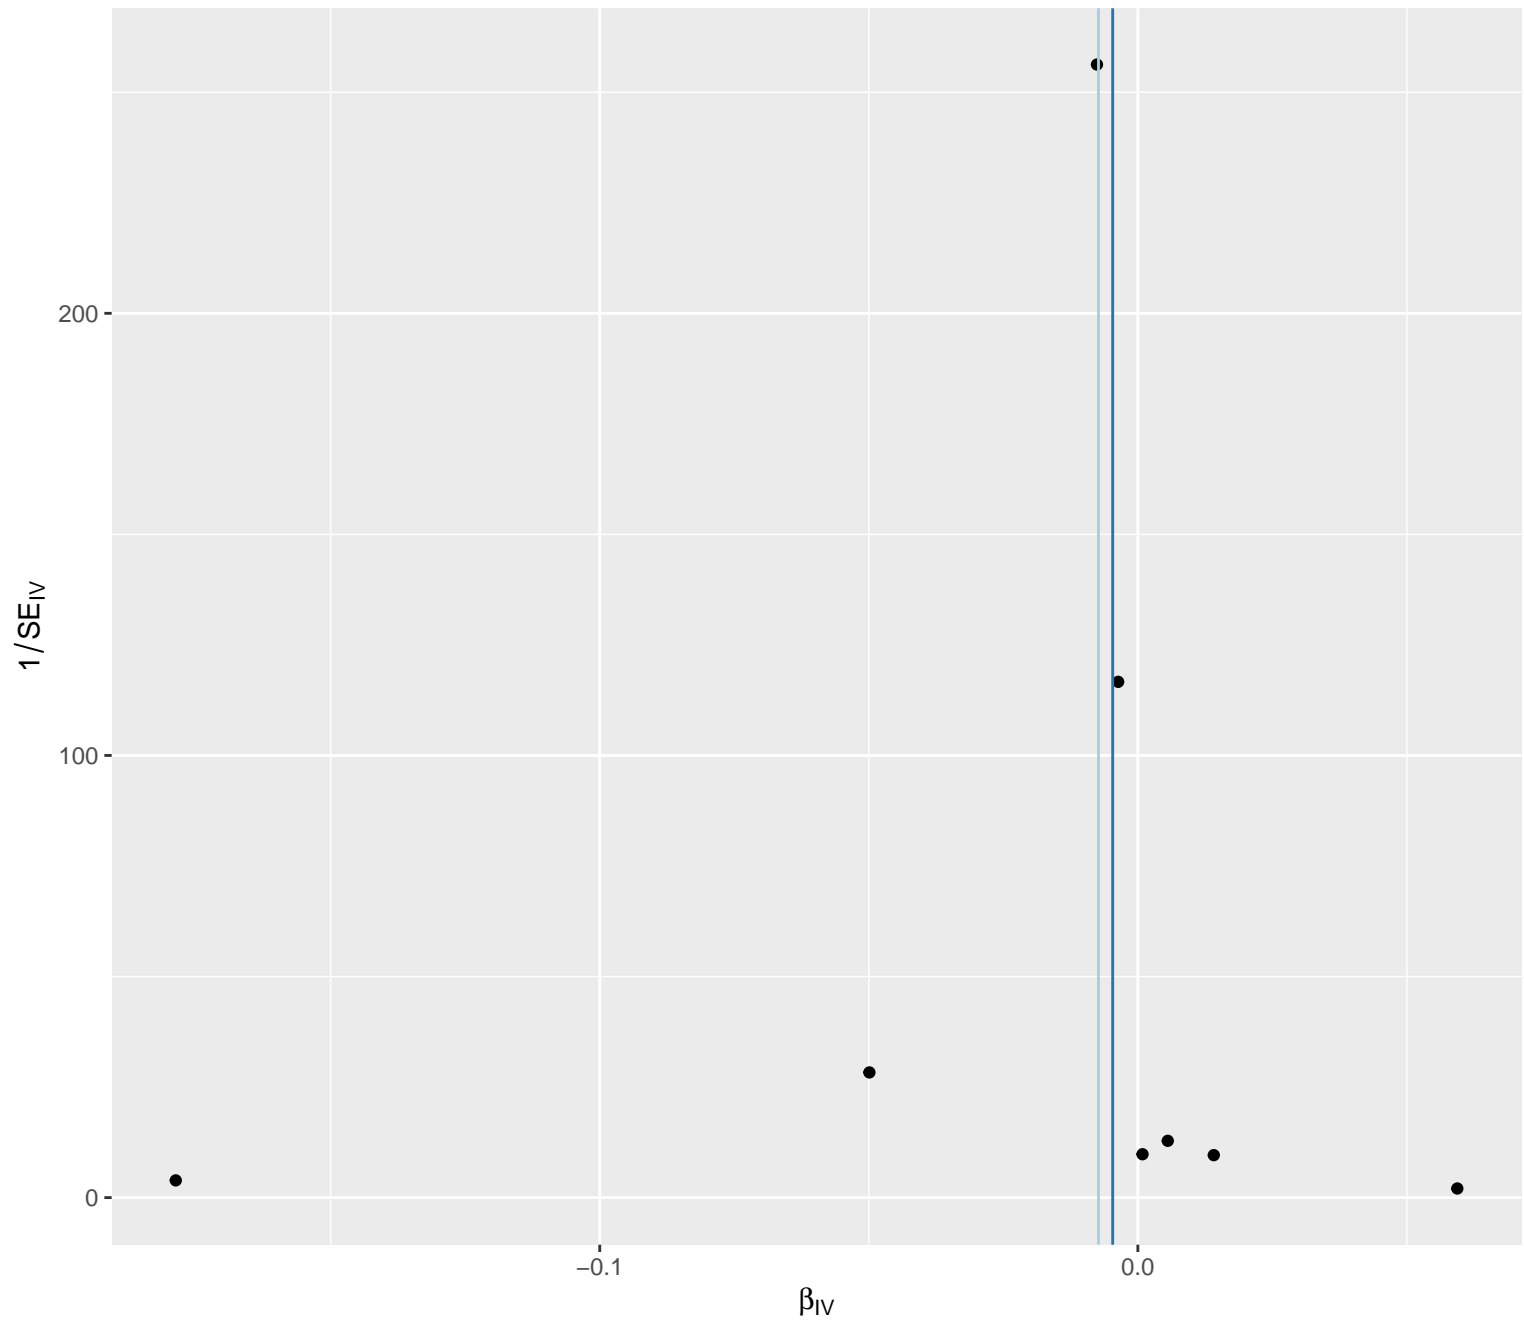

Funnel plot to assess heterogeneity between  
HLA DR++ monocyte %monocyte  
and ER+ breast cancer

### MR Method

- Inverse variance weighted
- MR Egger

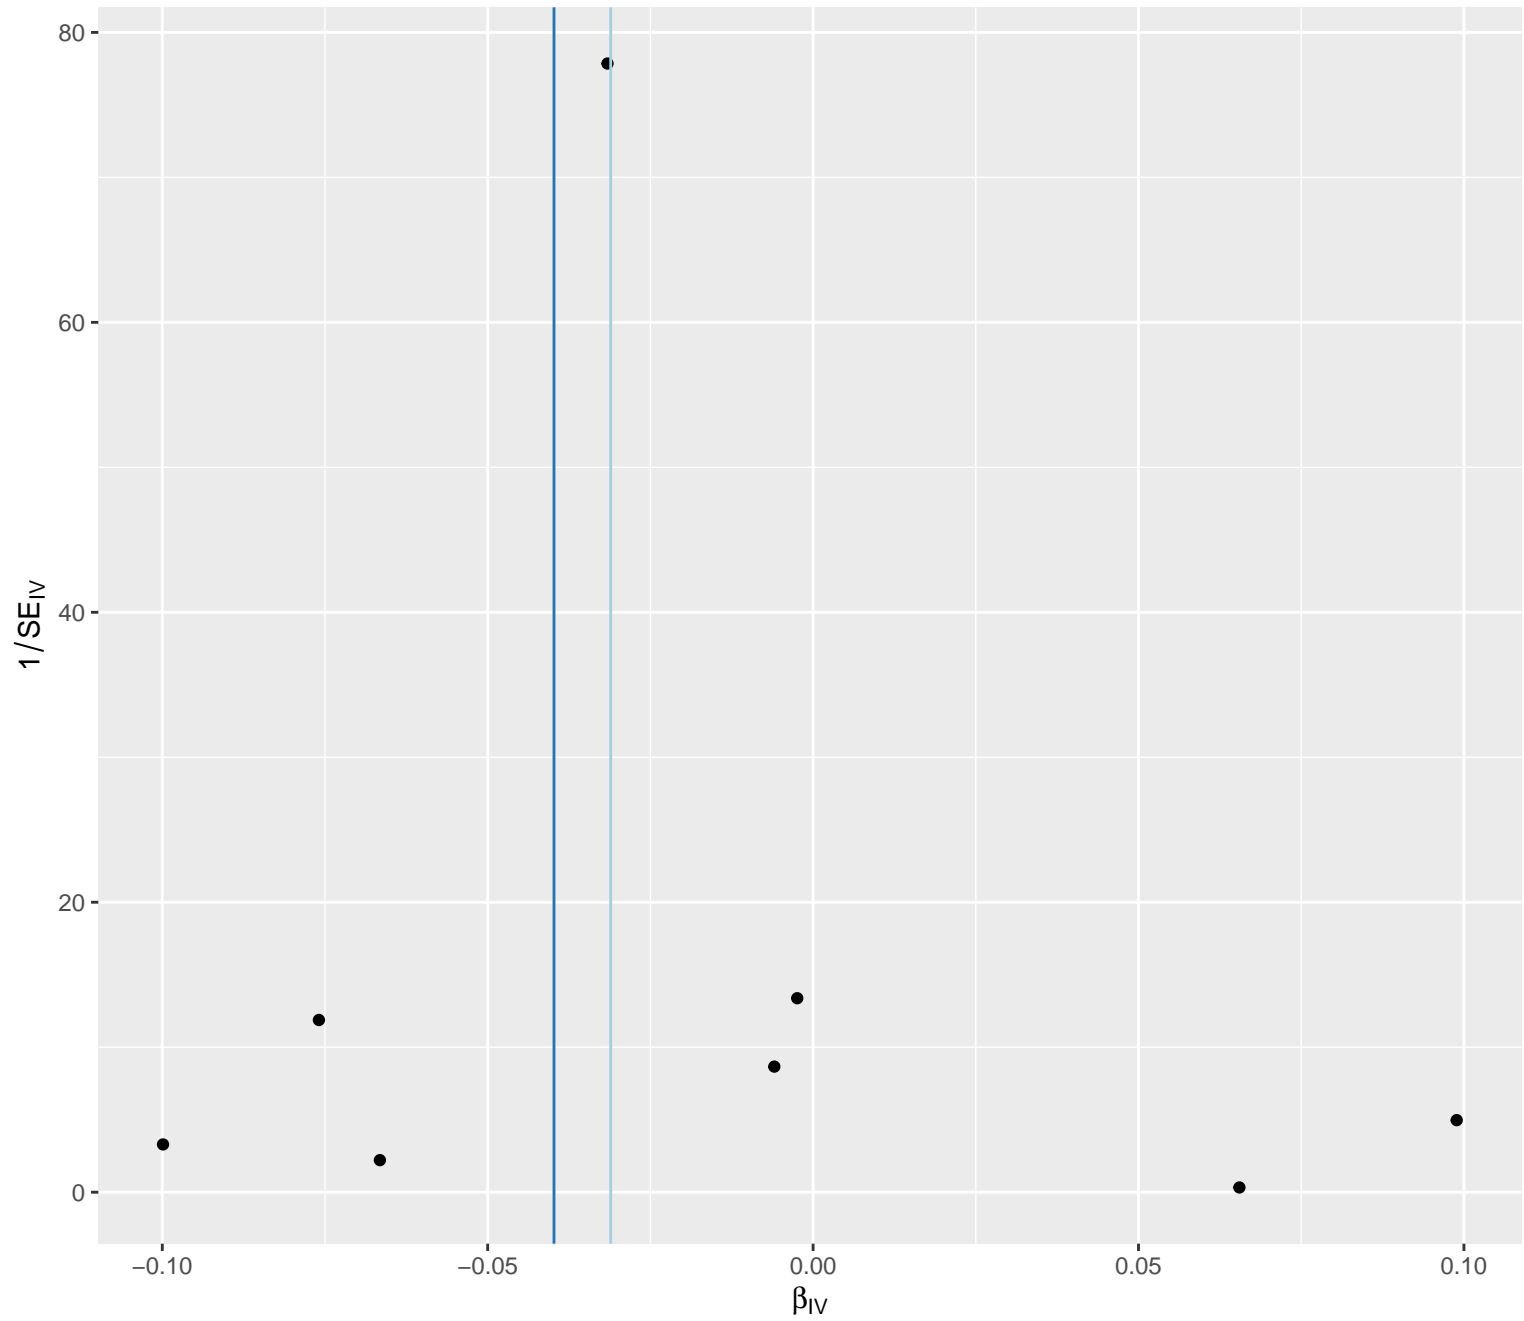



Funnel plot to assess heterogeneity between  
CD4 Treg %T cell and ER+ breast cancer

MR Method

- Inverse variance weighted
- MR Egger

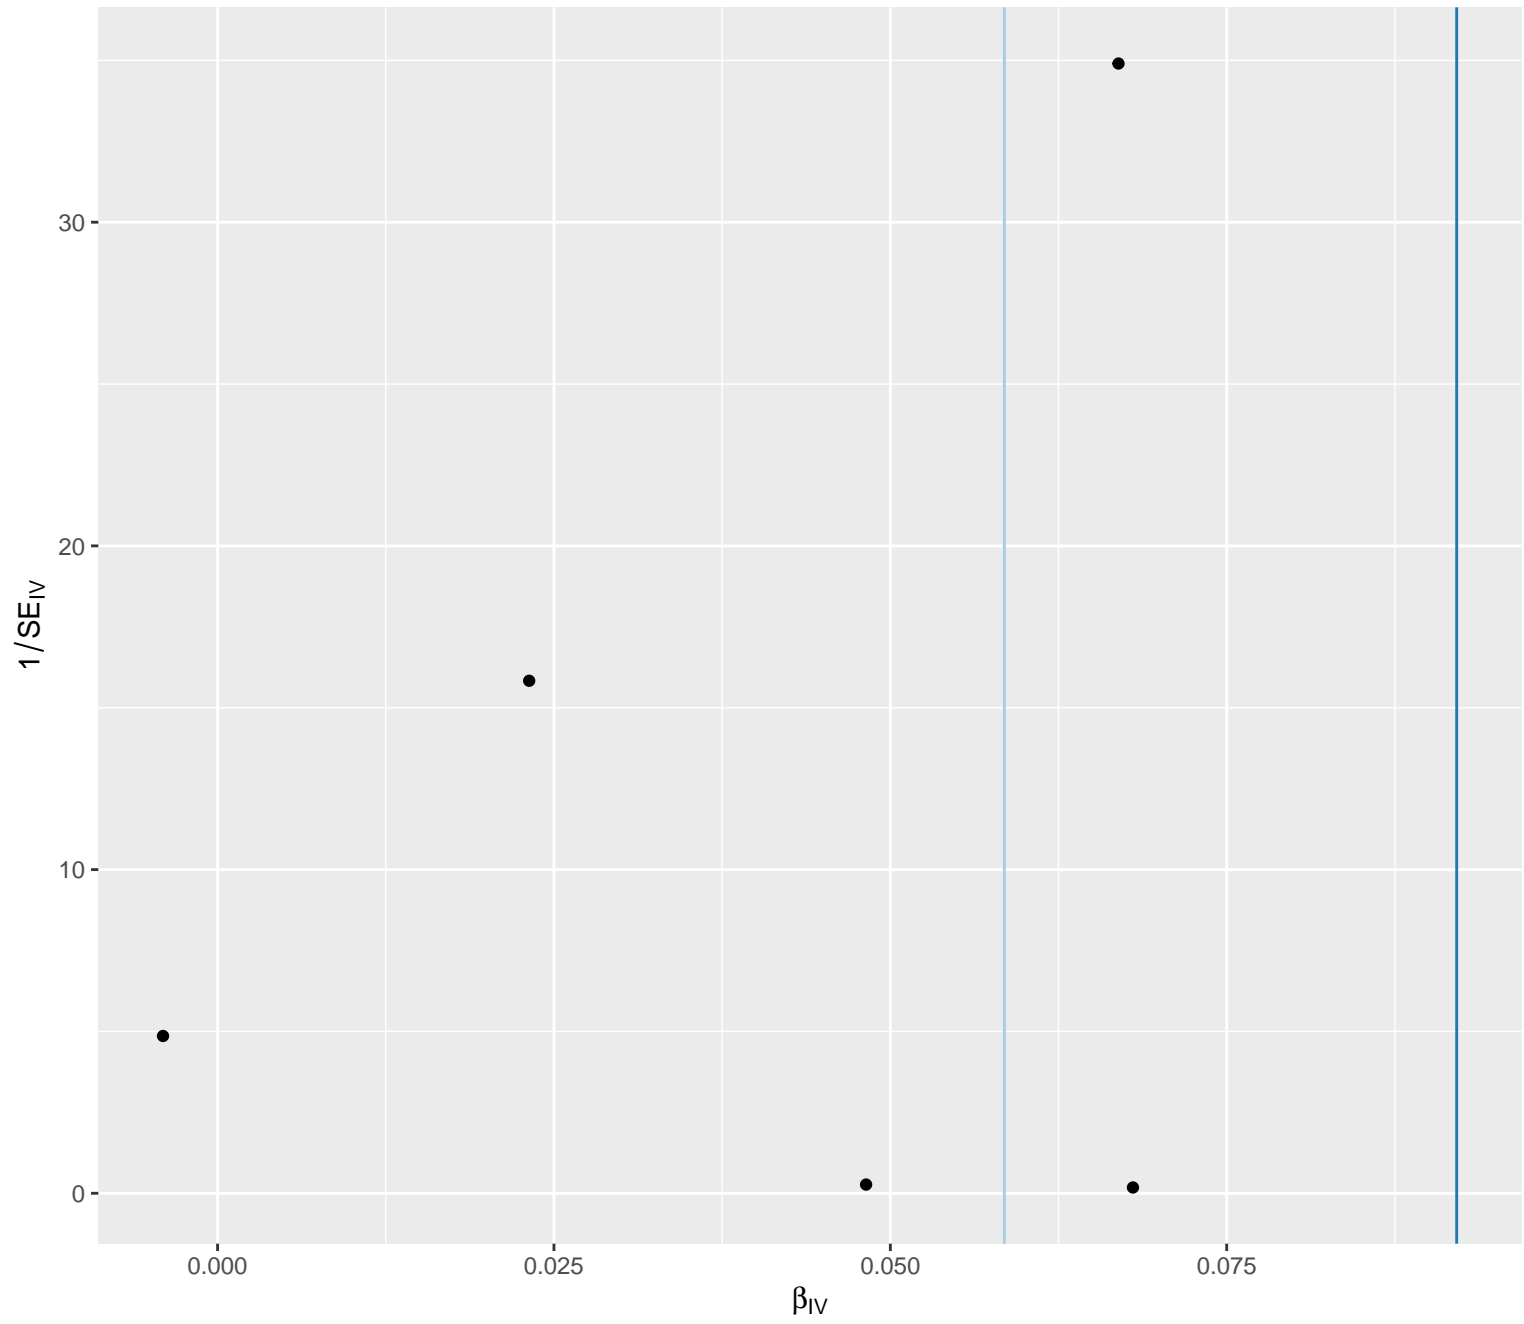

Funnel plot to assess heterogeneity between Activated & resting Treg AC and ER+ breast cancer

### MR Method

- Inverse variance weighted
- MR Egger

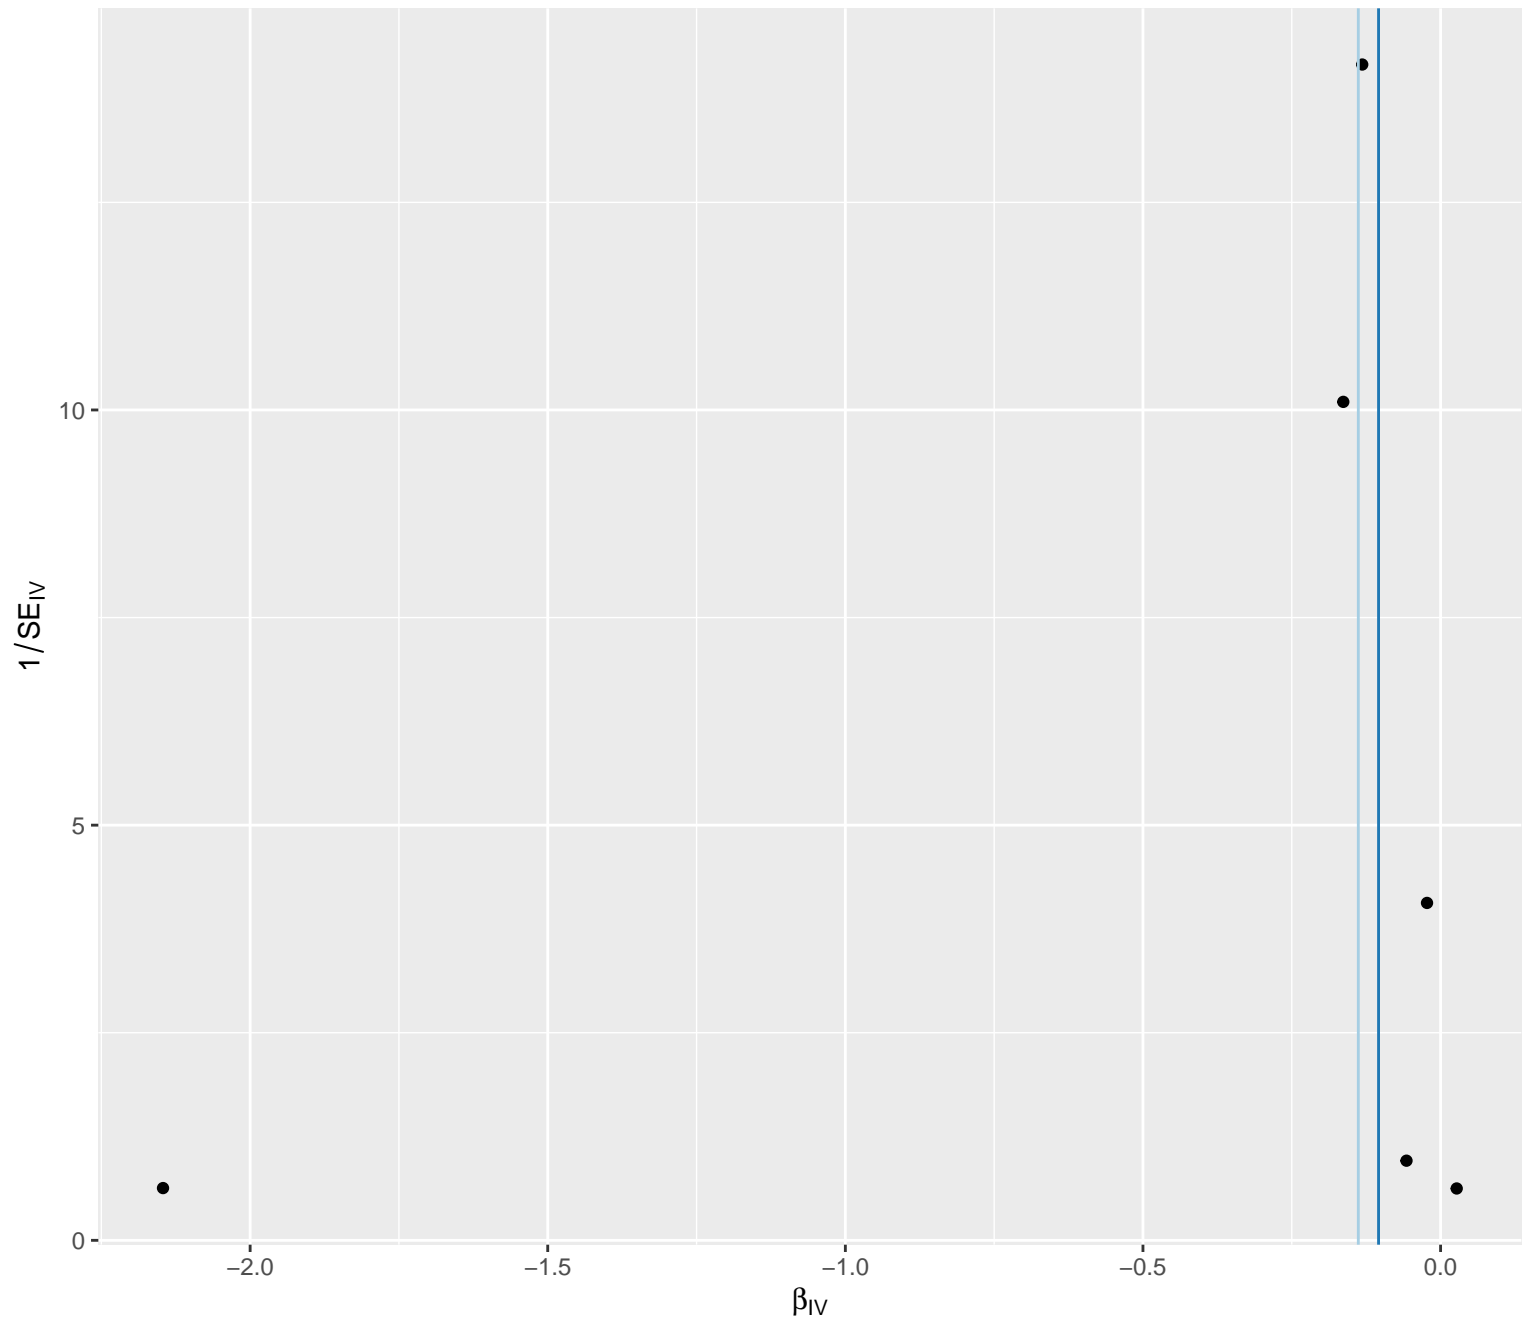

Funnel plot to assess heterogeneity between  
CD33- HLA DR+ ACand ER+ breast cancer

### MR Method

- Inverse variance weighted
- MR Egger

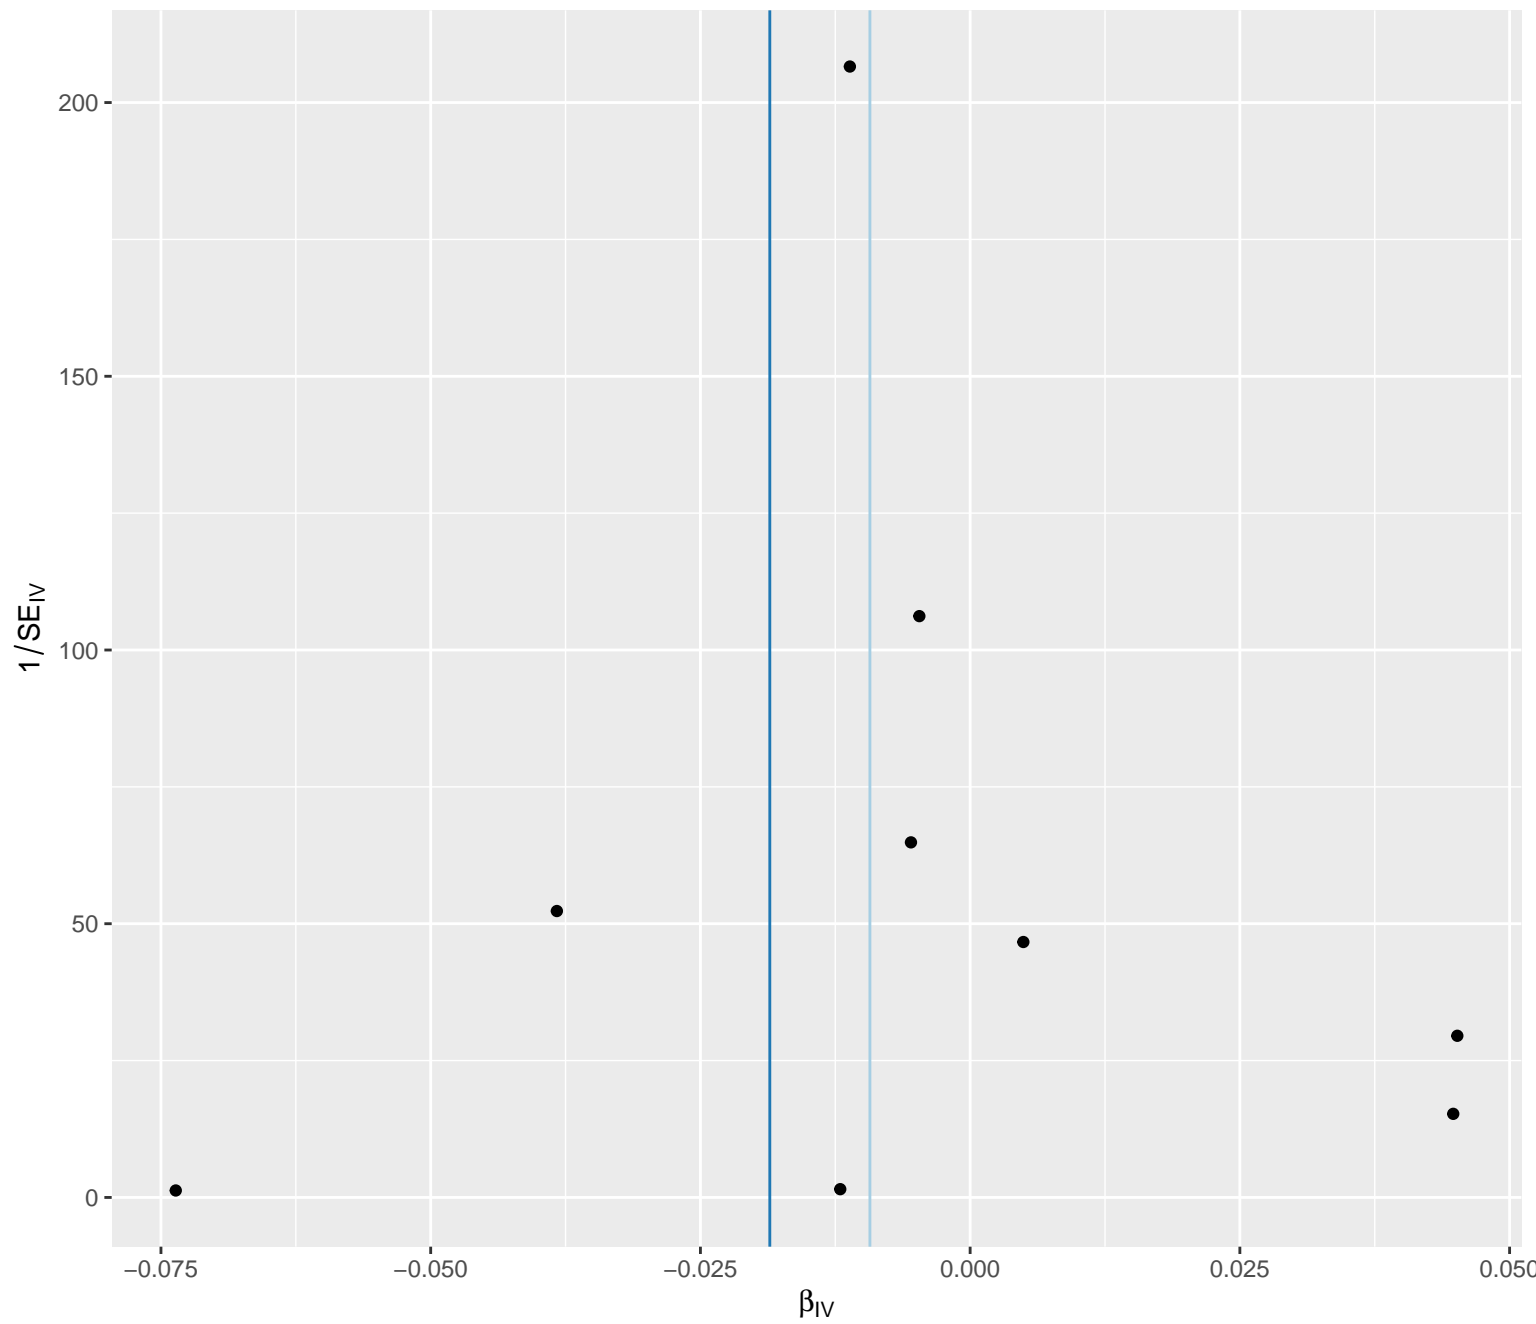

Funnel plot to assess heterogeneity between CD45RA- CD4+ %CD4+ and ER+ breast cancer

MR Method

- Inverse variance weighted
- MR Egger

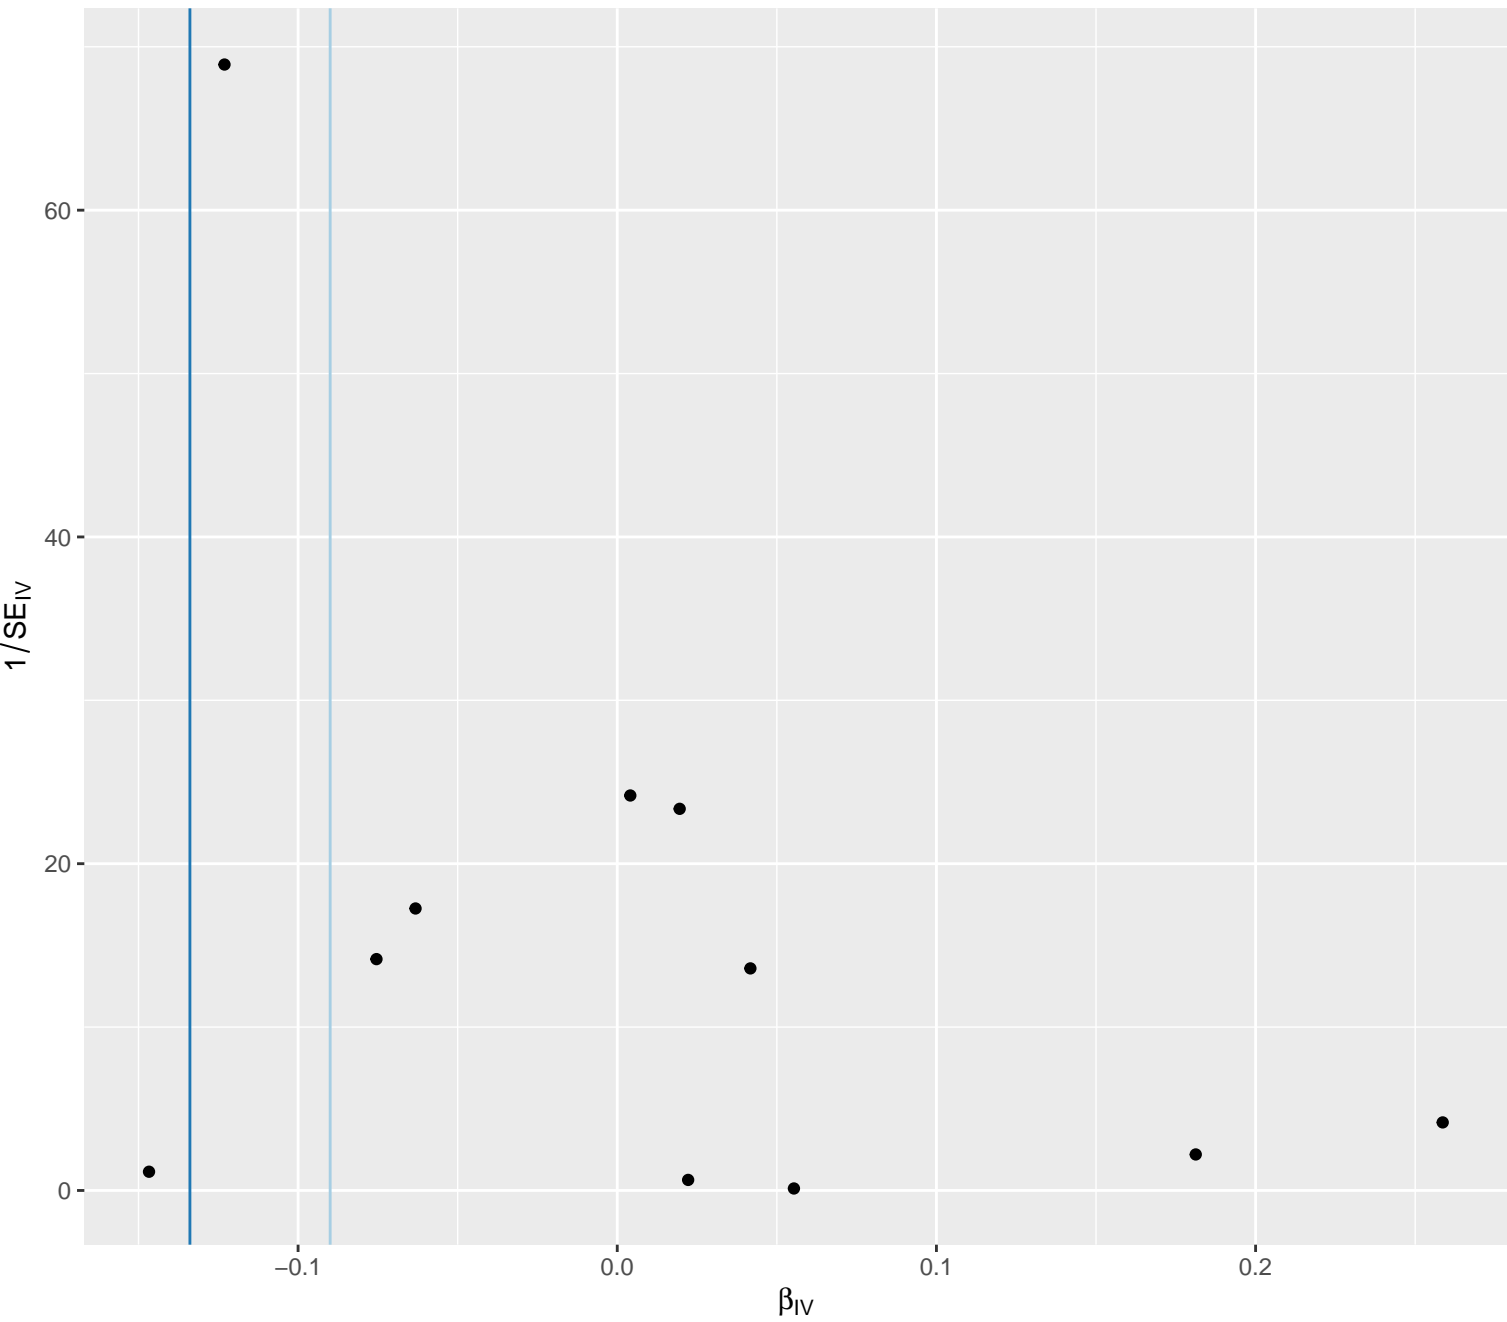

### MR Method

Funnel plot to assess heterogeneity between CD14+ CD16- monocyte AC and ER+ breast cancer

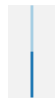

Inverse variance weighted

MR Egger

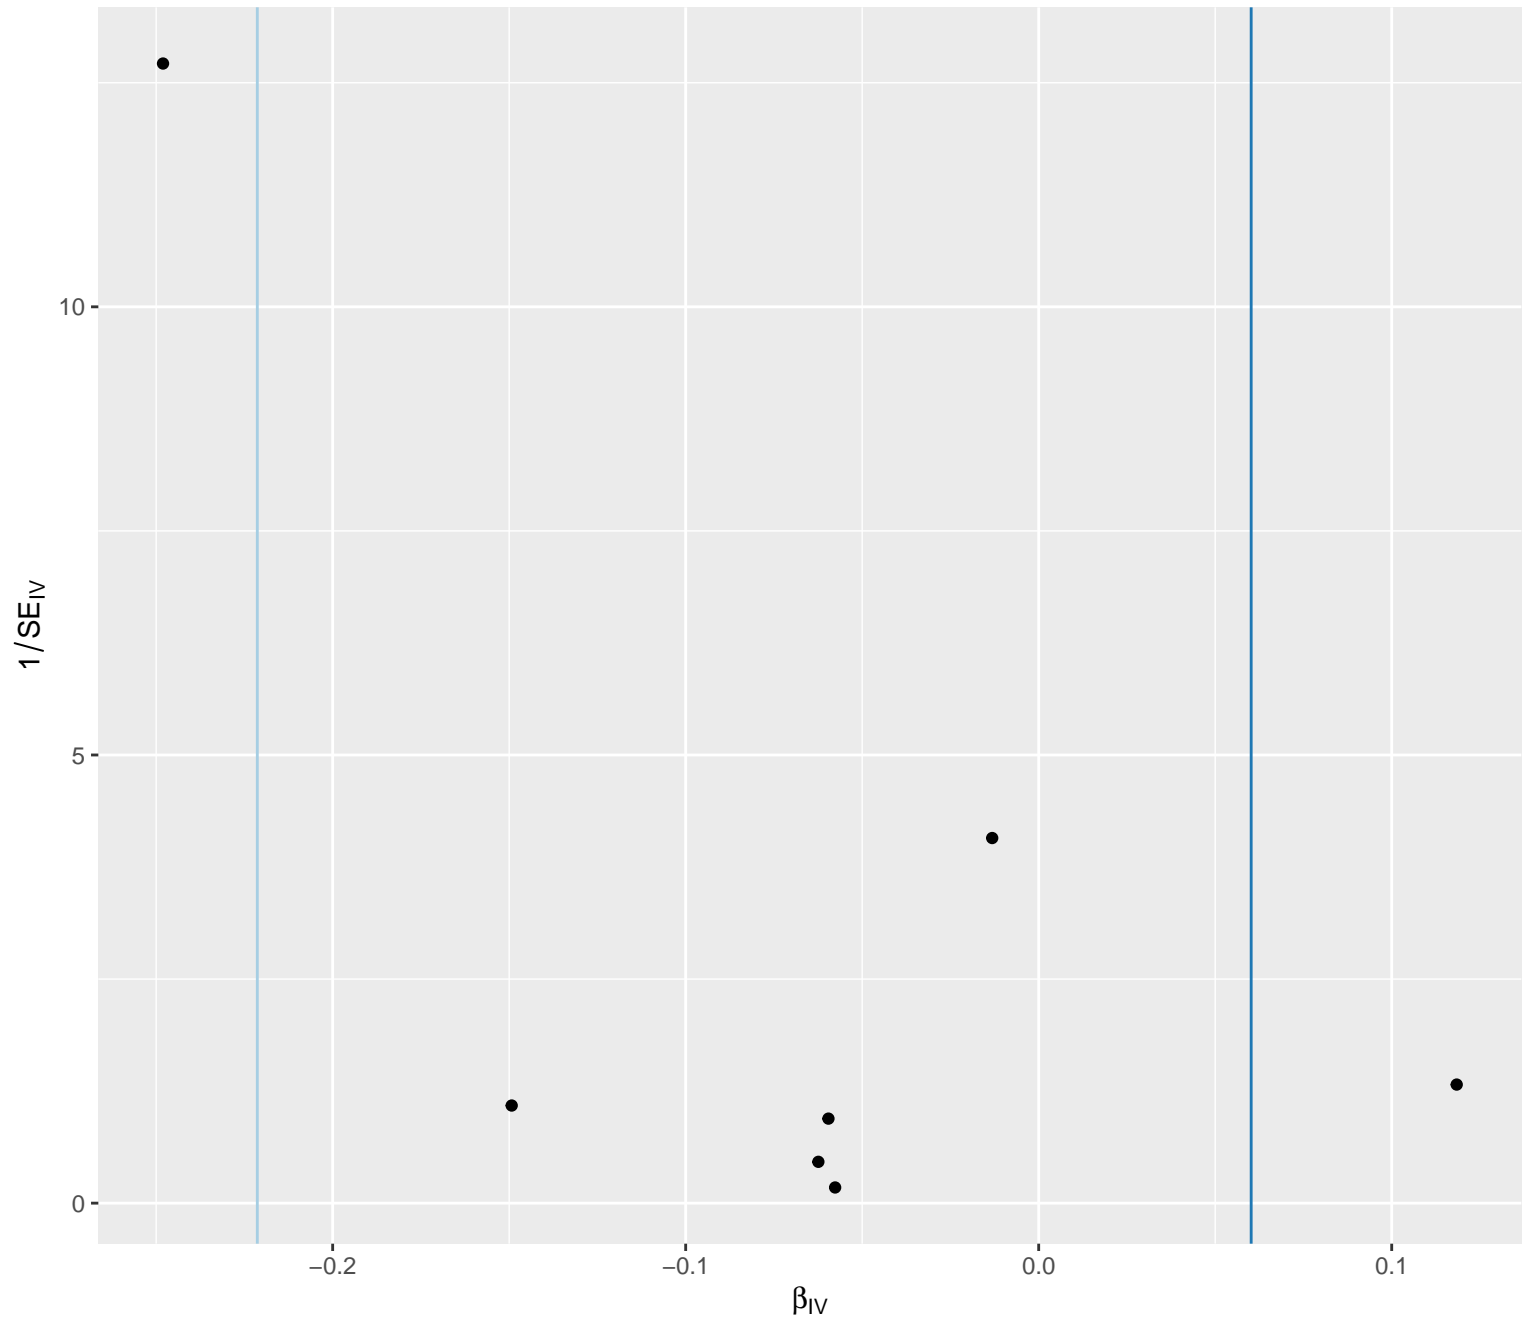

Funnel plot to assess heterogeneity between  
CD8dim %T cell and ER+ breast cancer

MR Method

- Inverse variance weighted
- MR Egger

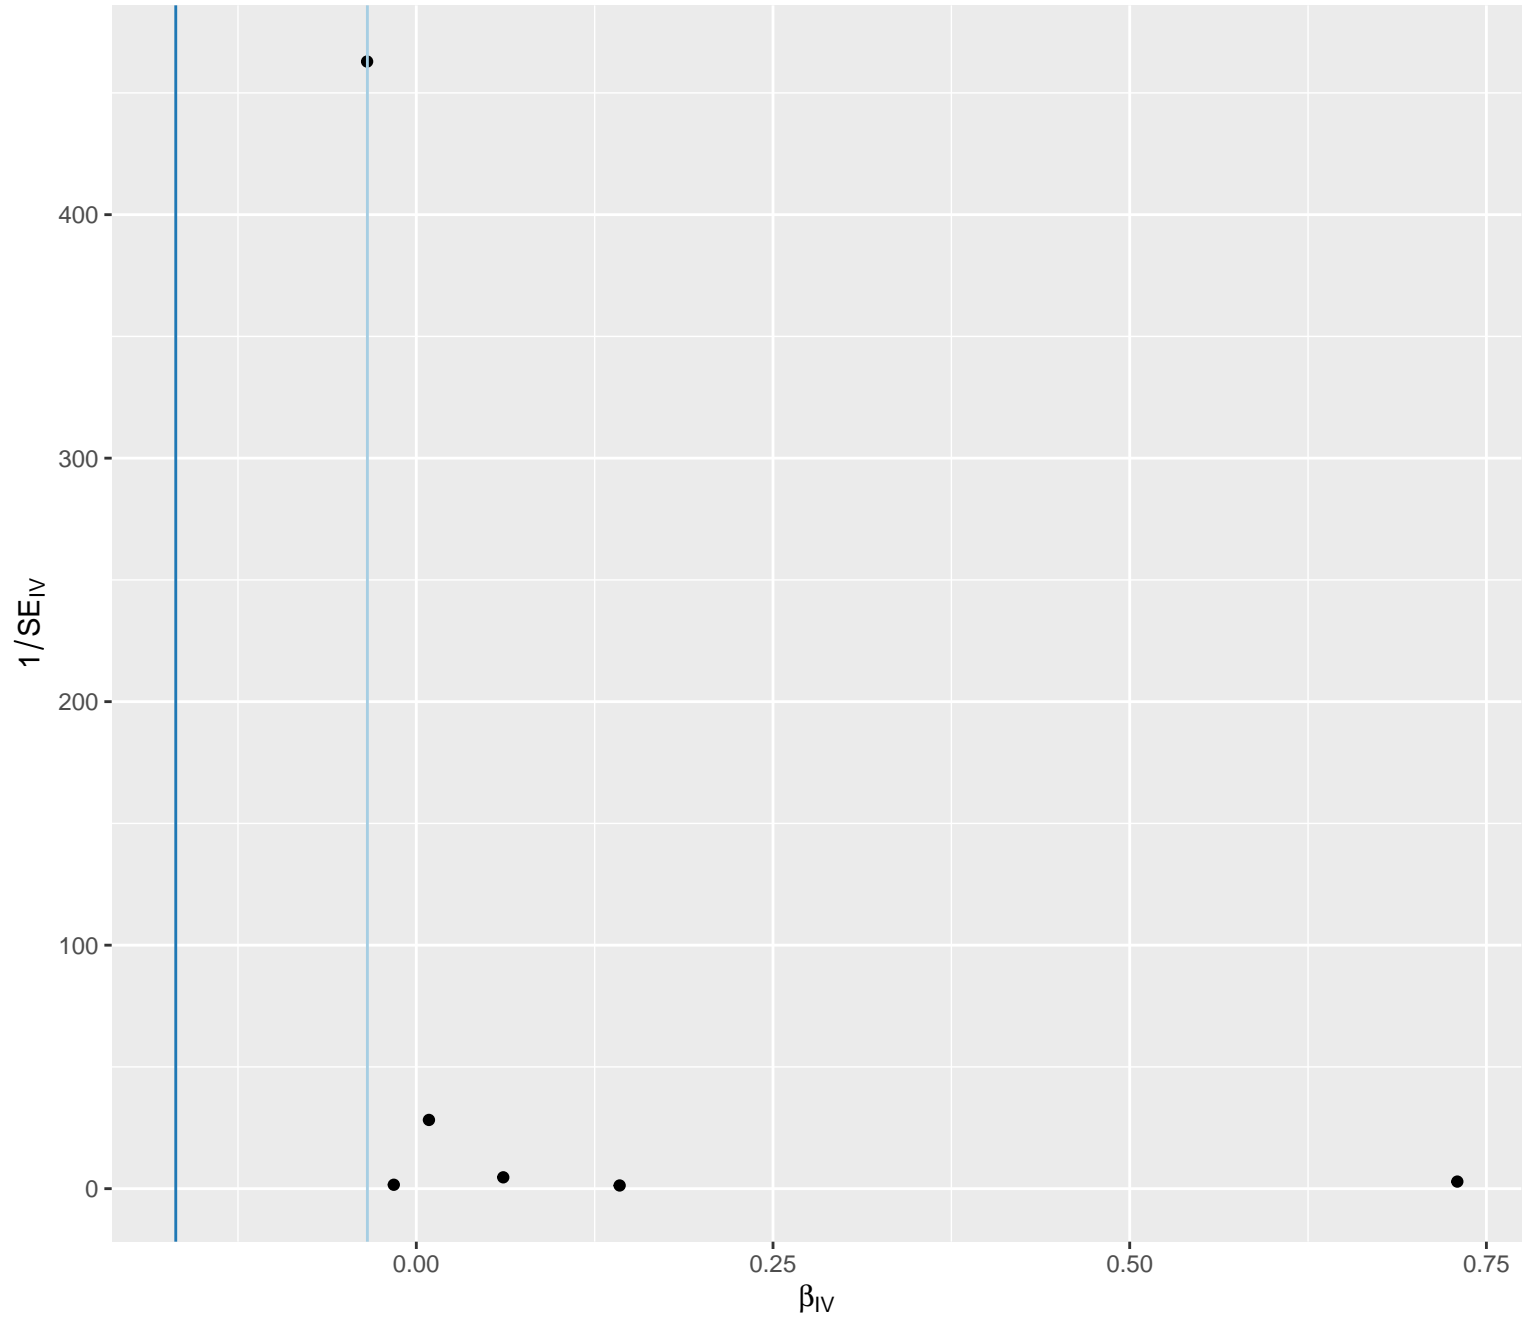

Funnel plot to assess heterogeneity between CD28- DN (CD4-CD8-) %DN and ER+ breast cancer

MR Method

- Inverse variance weighted
- MR Egger

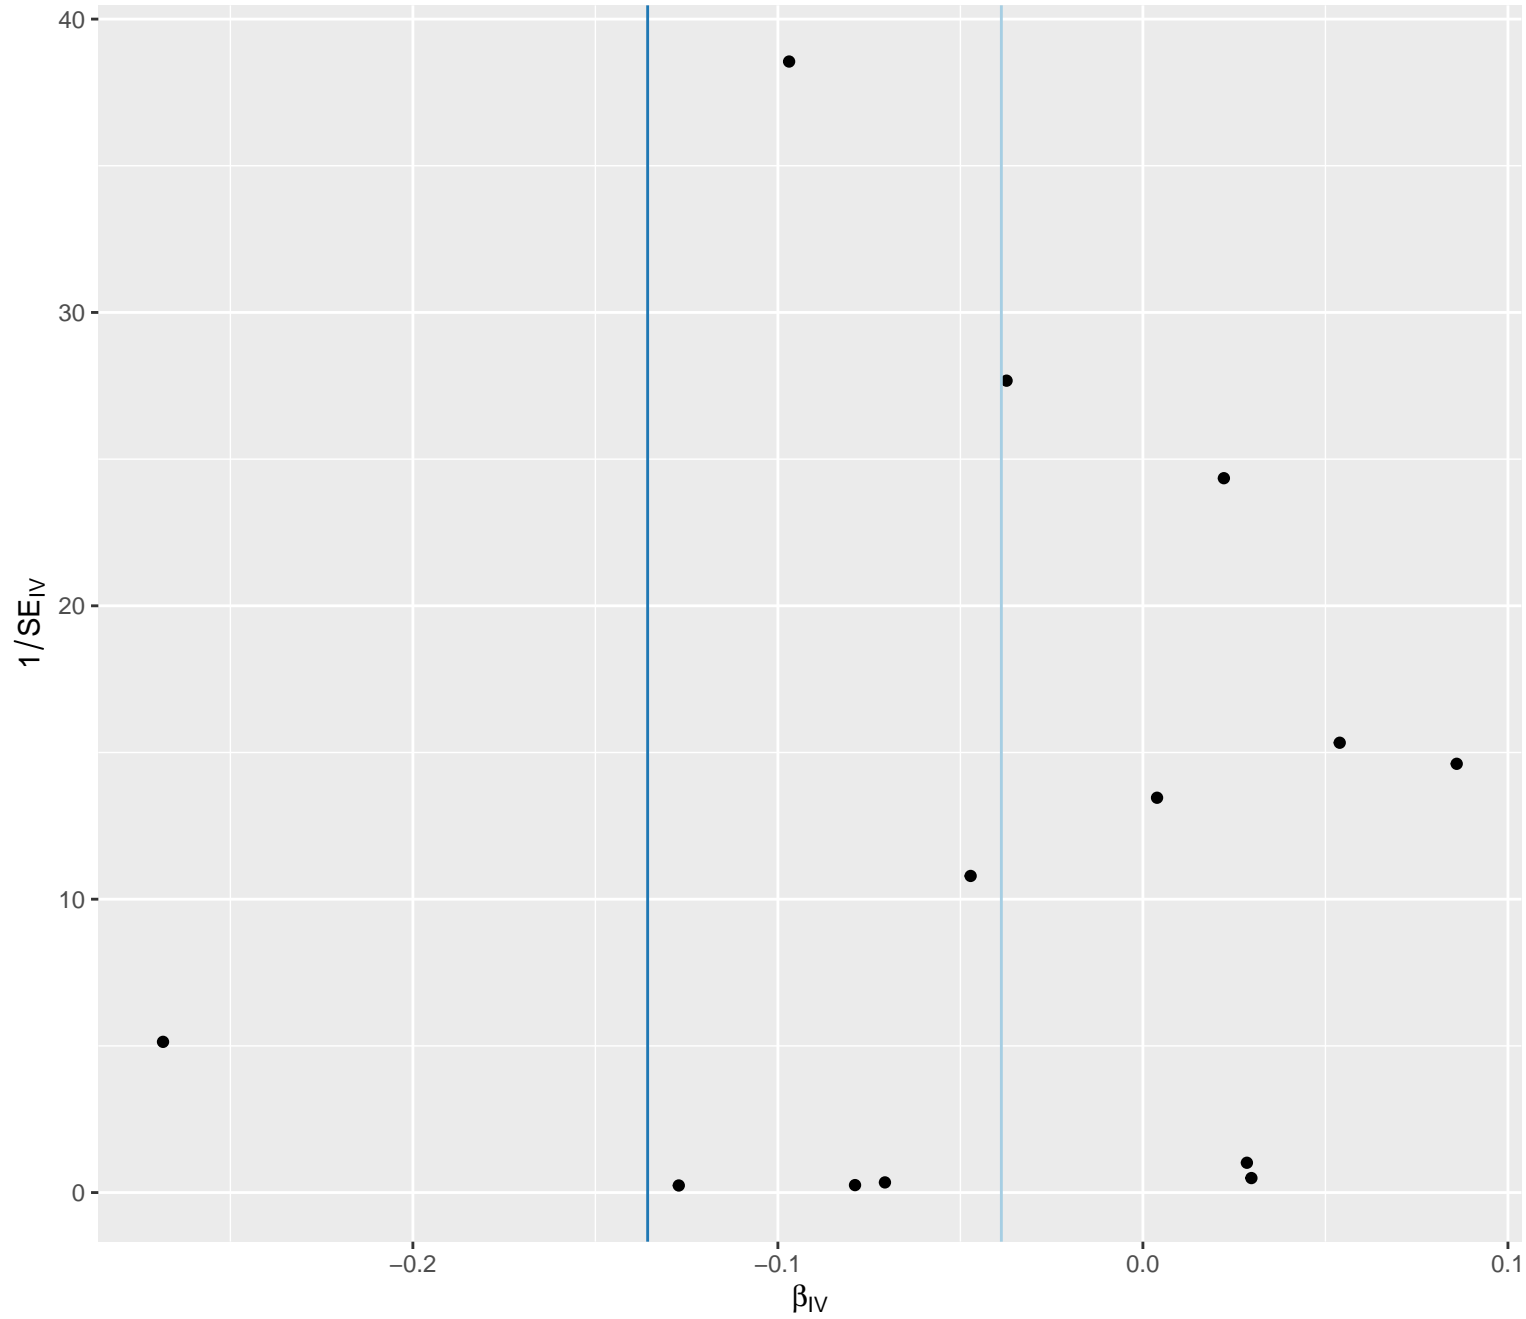

Funnel plot to assess heterogeneity between  
CD127- CD8br AC and ER+ breast cancer

MR Method

- Inverse variance weighted
- MR Egger

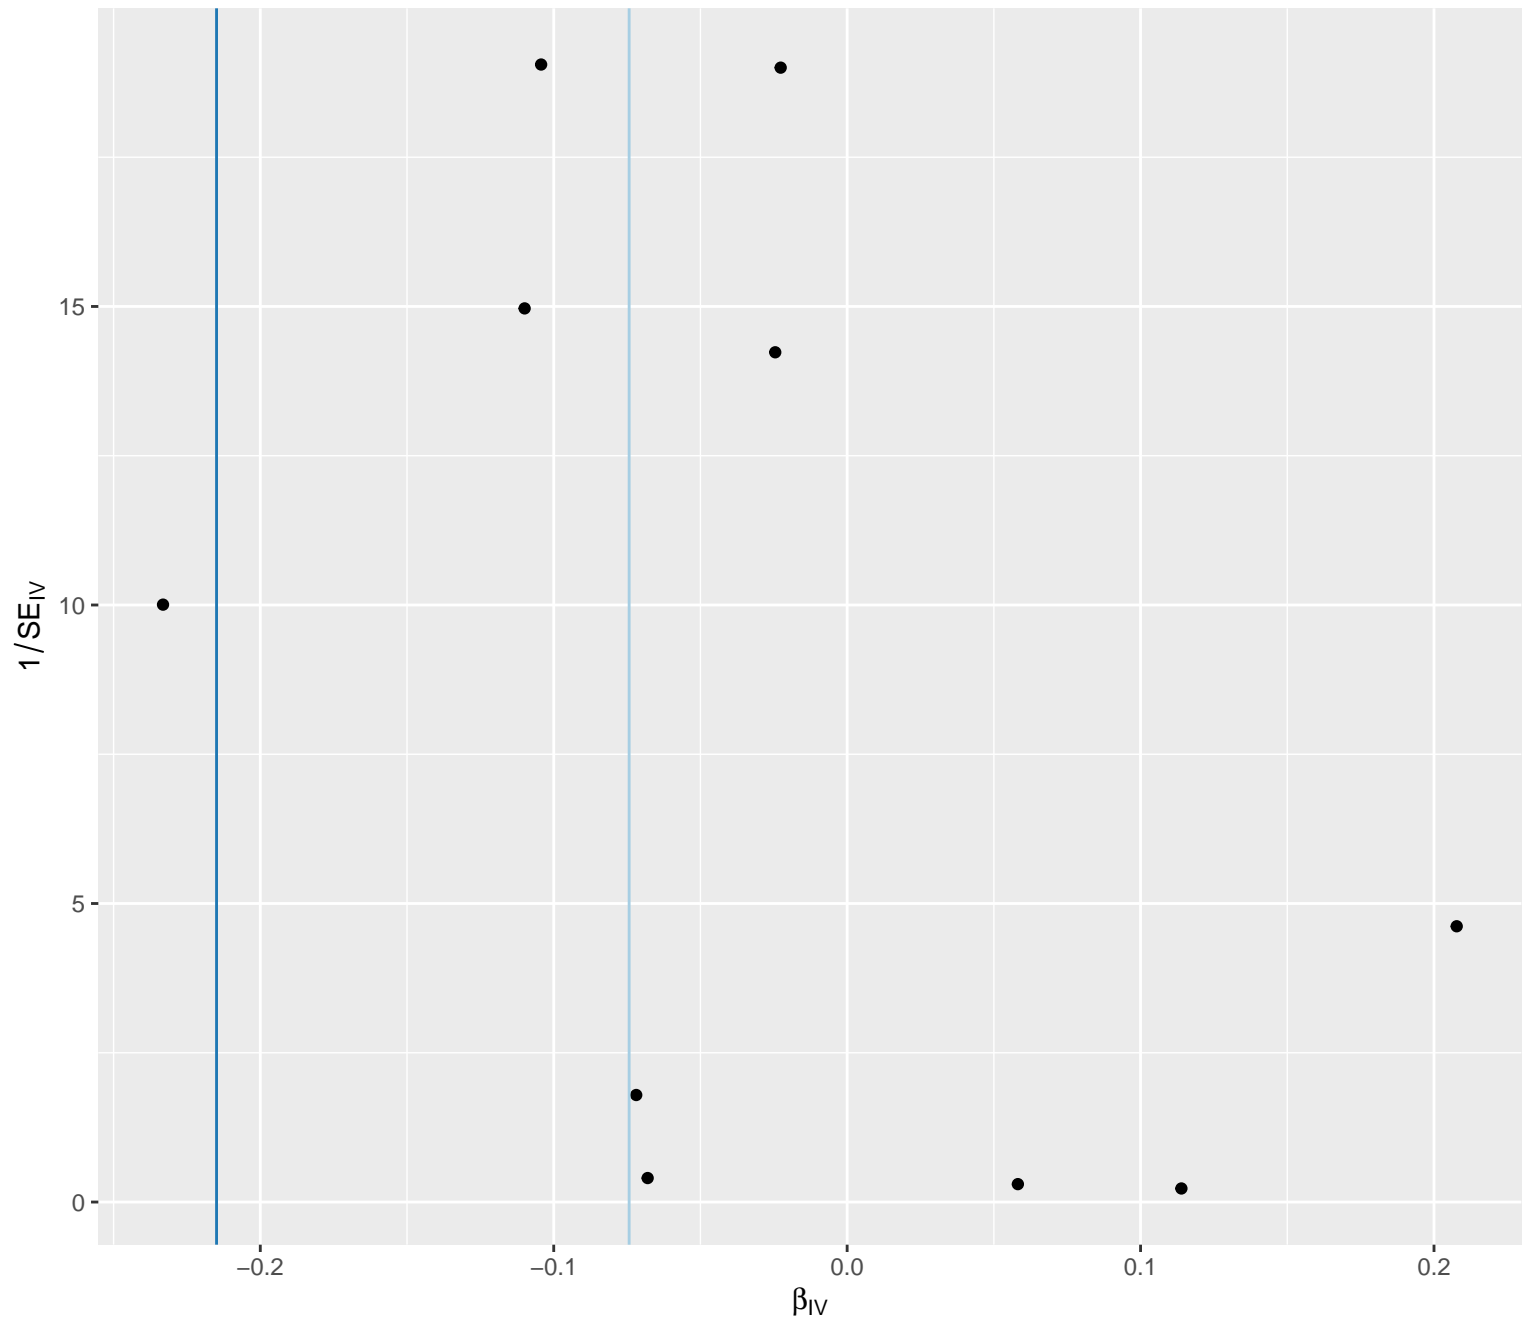



Funnel plot to assess heterogeneity between  
BAFF-R on IgD+ CD38- unsw mem  
and ER+ breast cancer

MR Method

- Inverse variance weighted
- MR Egger

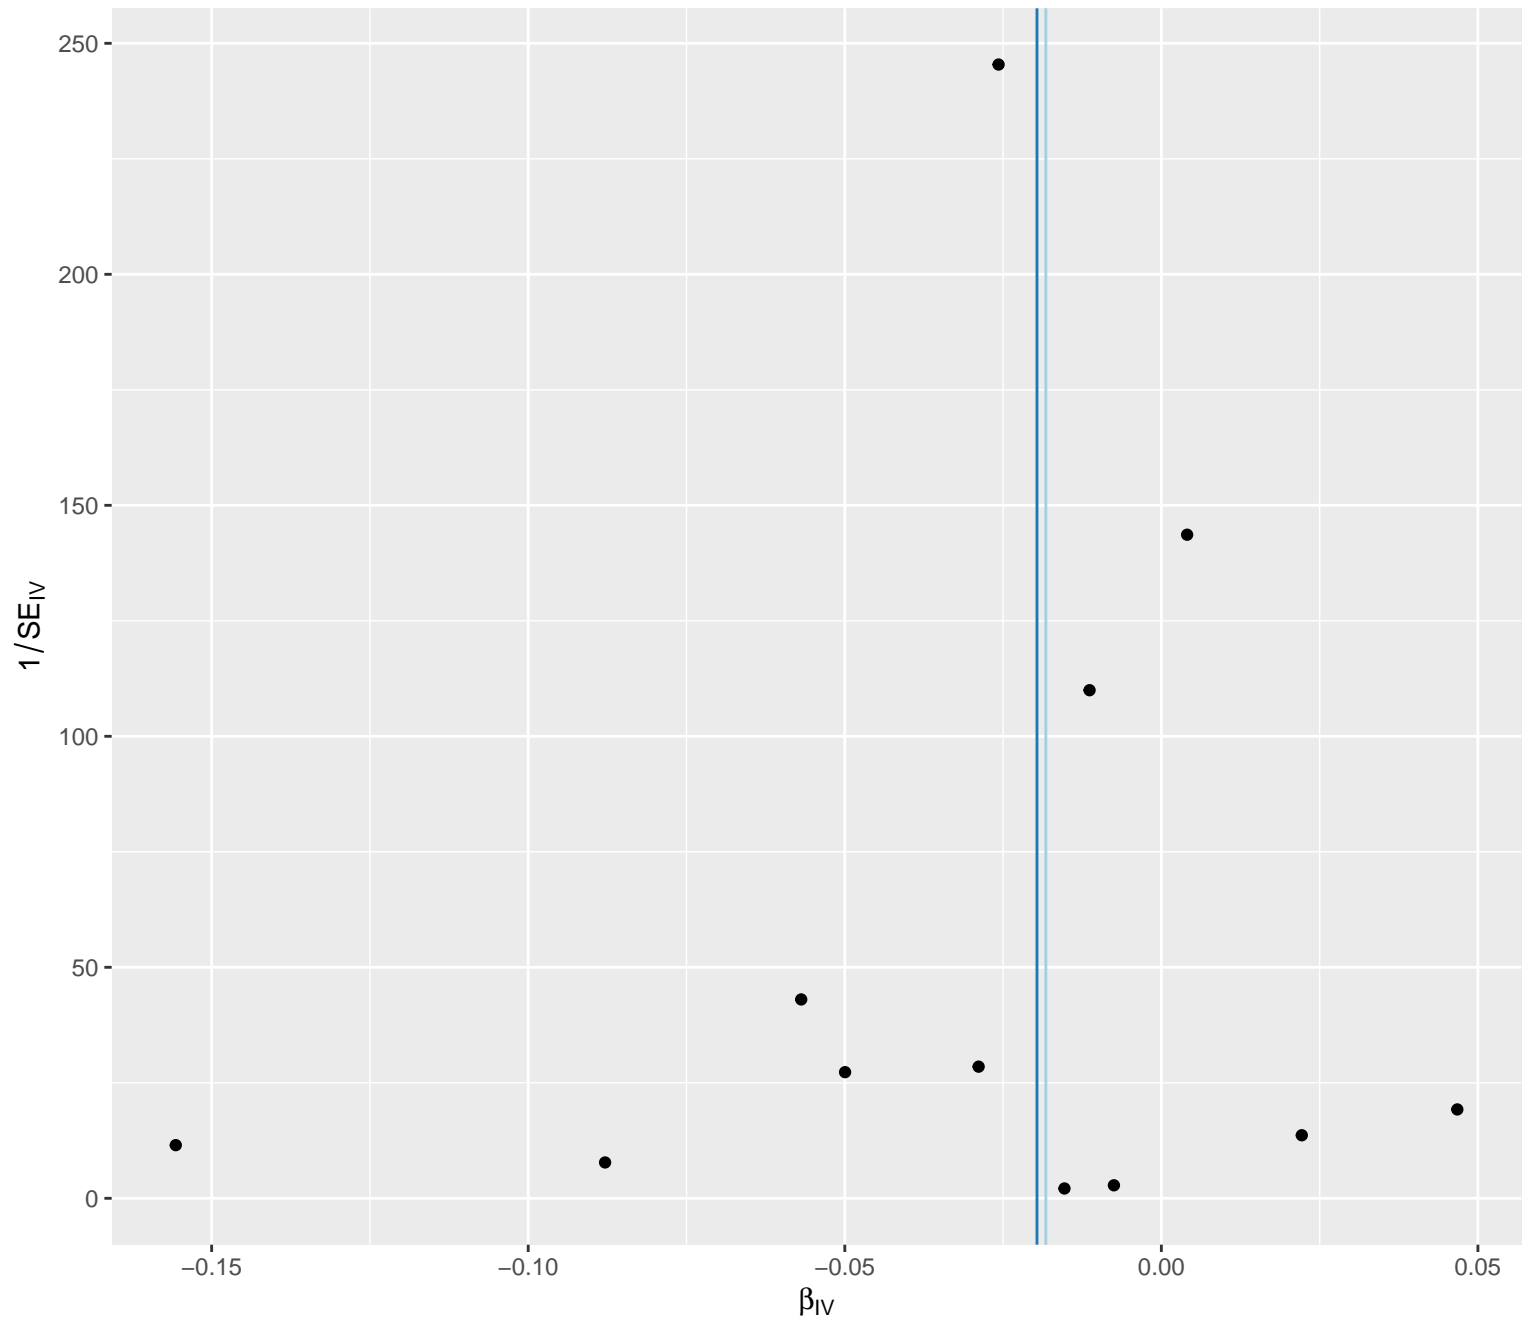

Funnel plot to assess heterogeneity between  
CD19 on IgD- CD38brand ER+ breast cancer

MR Method

- Inverse variance weighted
- MR Egger

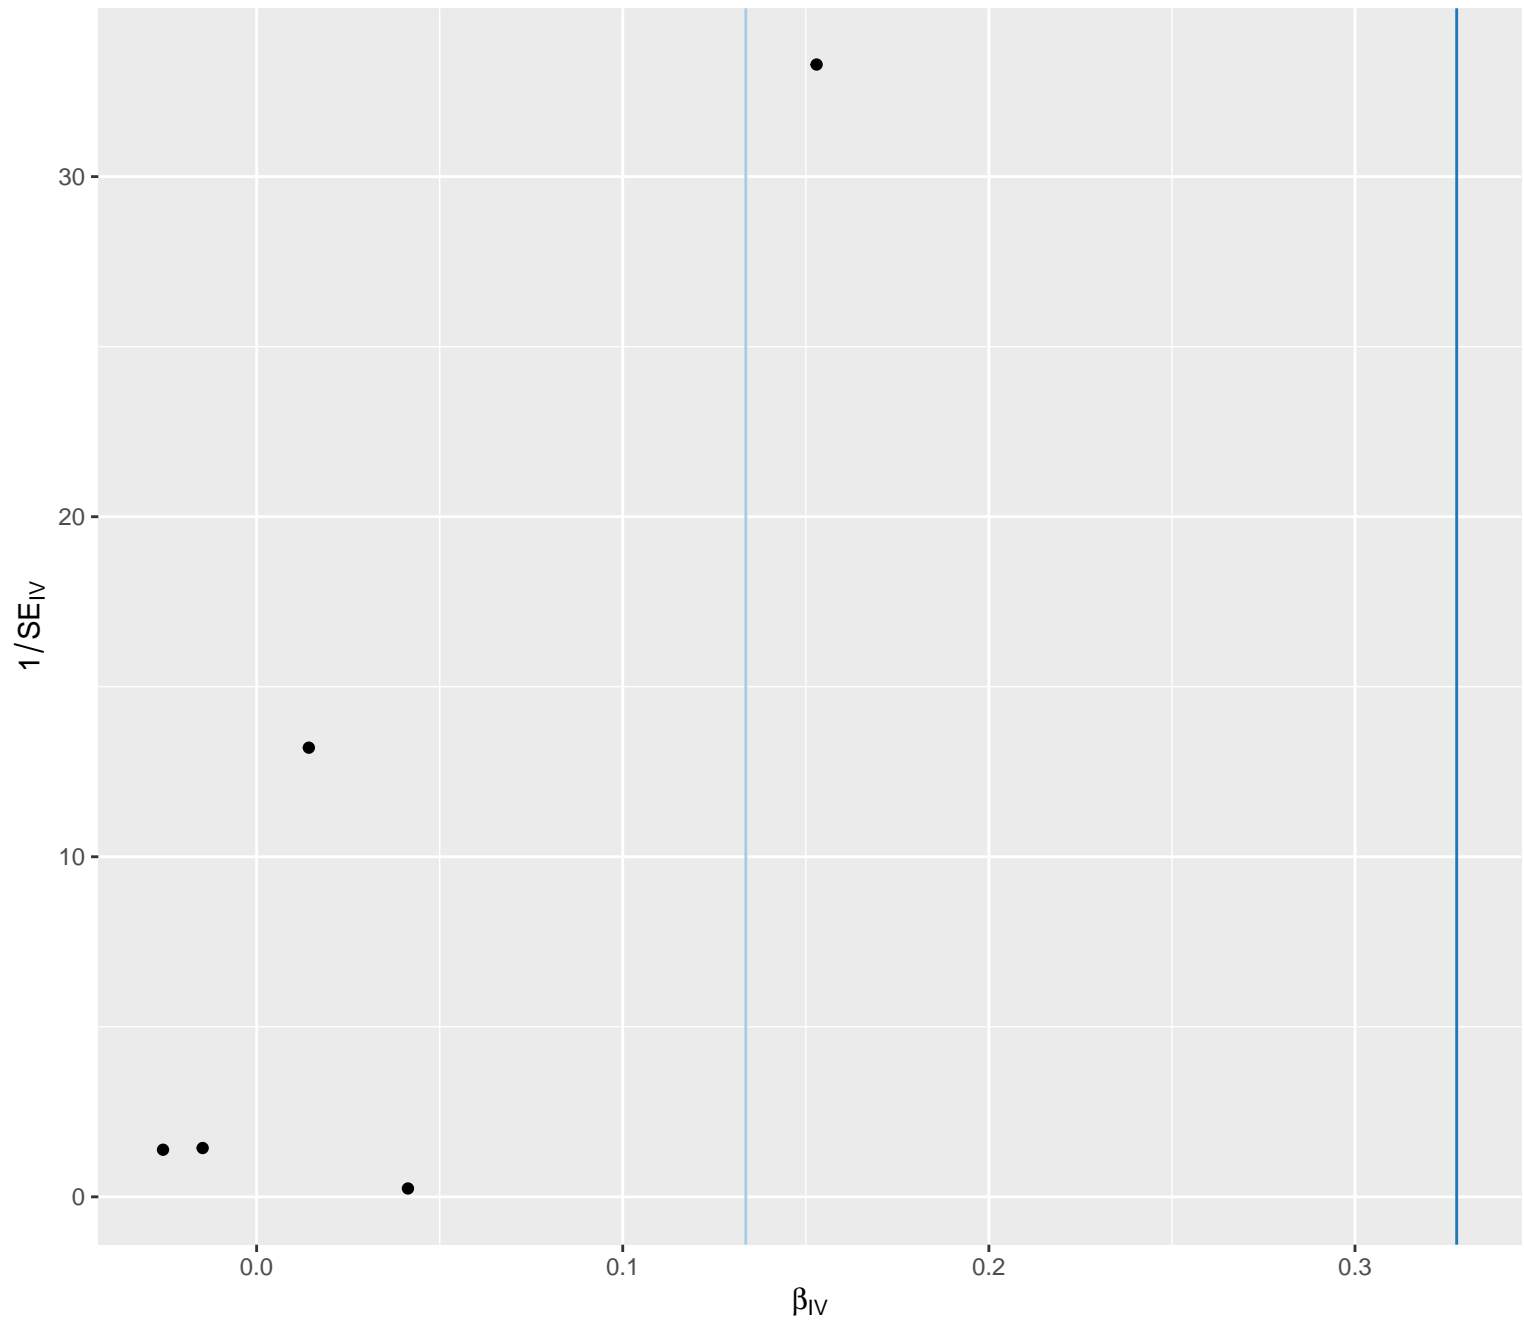

Funnel plot to assess heterogeneity between CD25 on IgD+ CD38dim and ER+ breast cancer

### MR Method

- Inverse variance weighted
- MR Egger

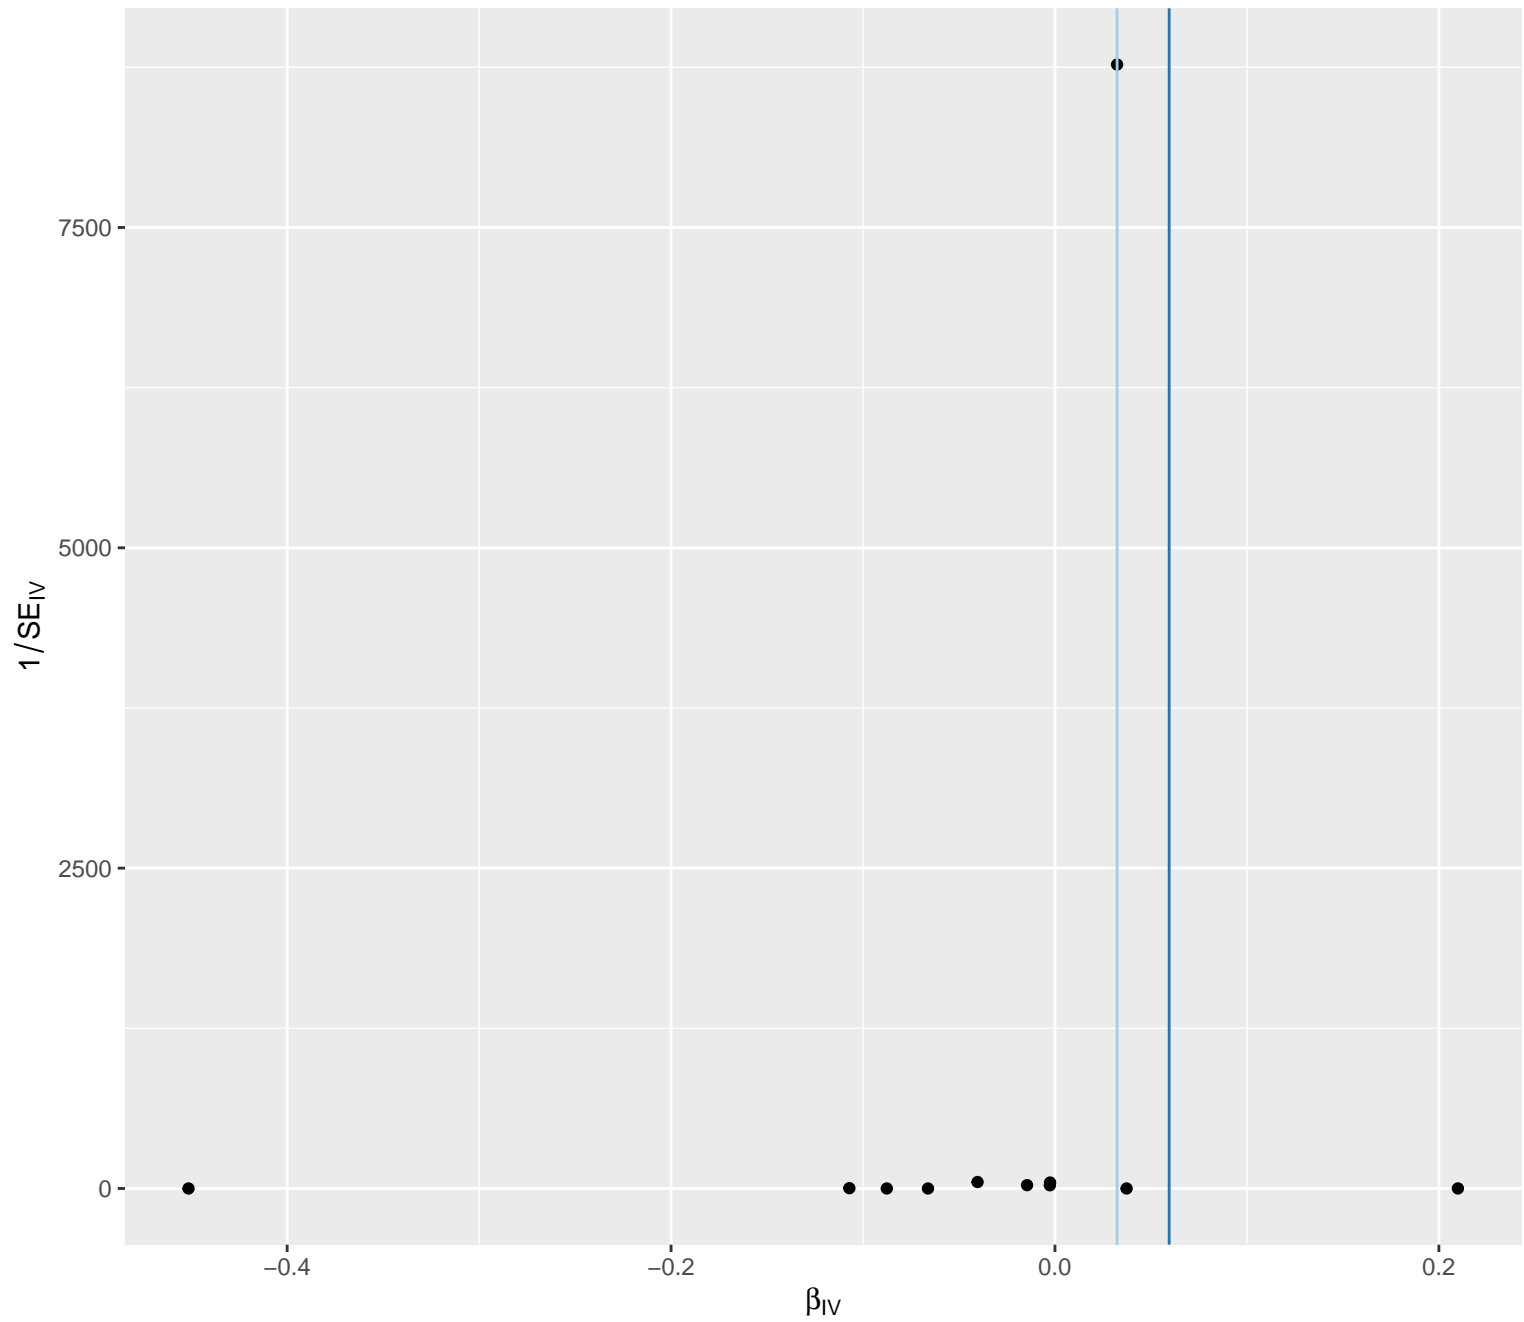

Funnel plot to assess heterogeneity between  
CD27 on PB/PC and ER+ breast cancer

MR Method

- Inverse variance weighted
- MR Egger

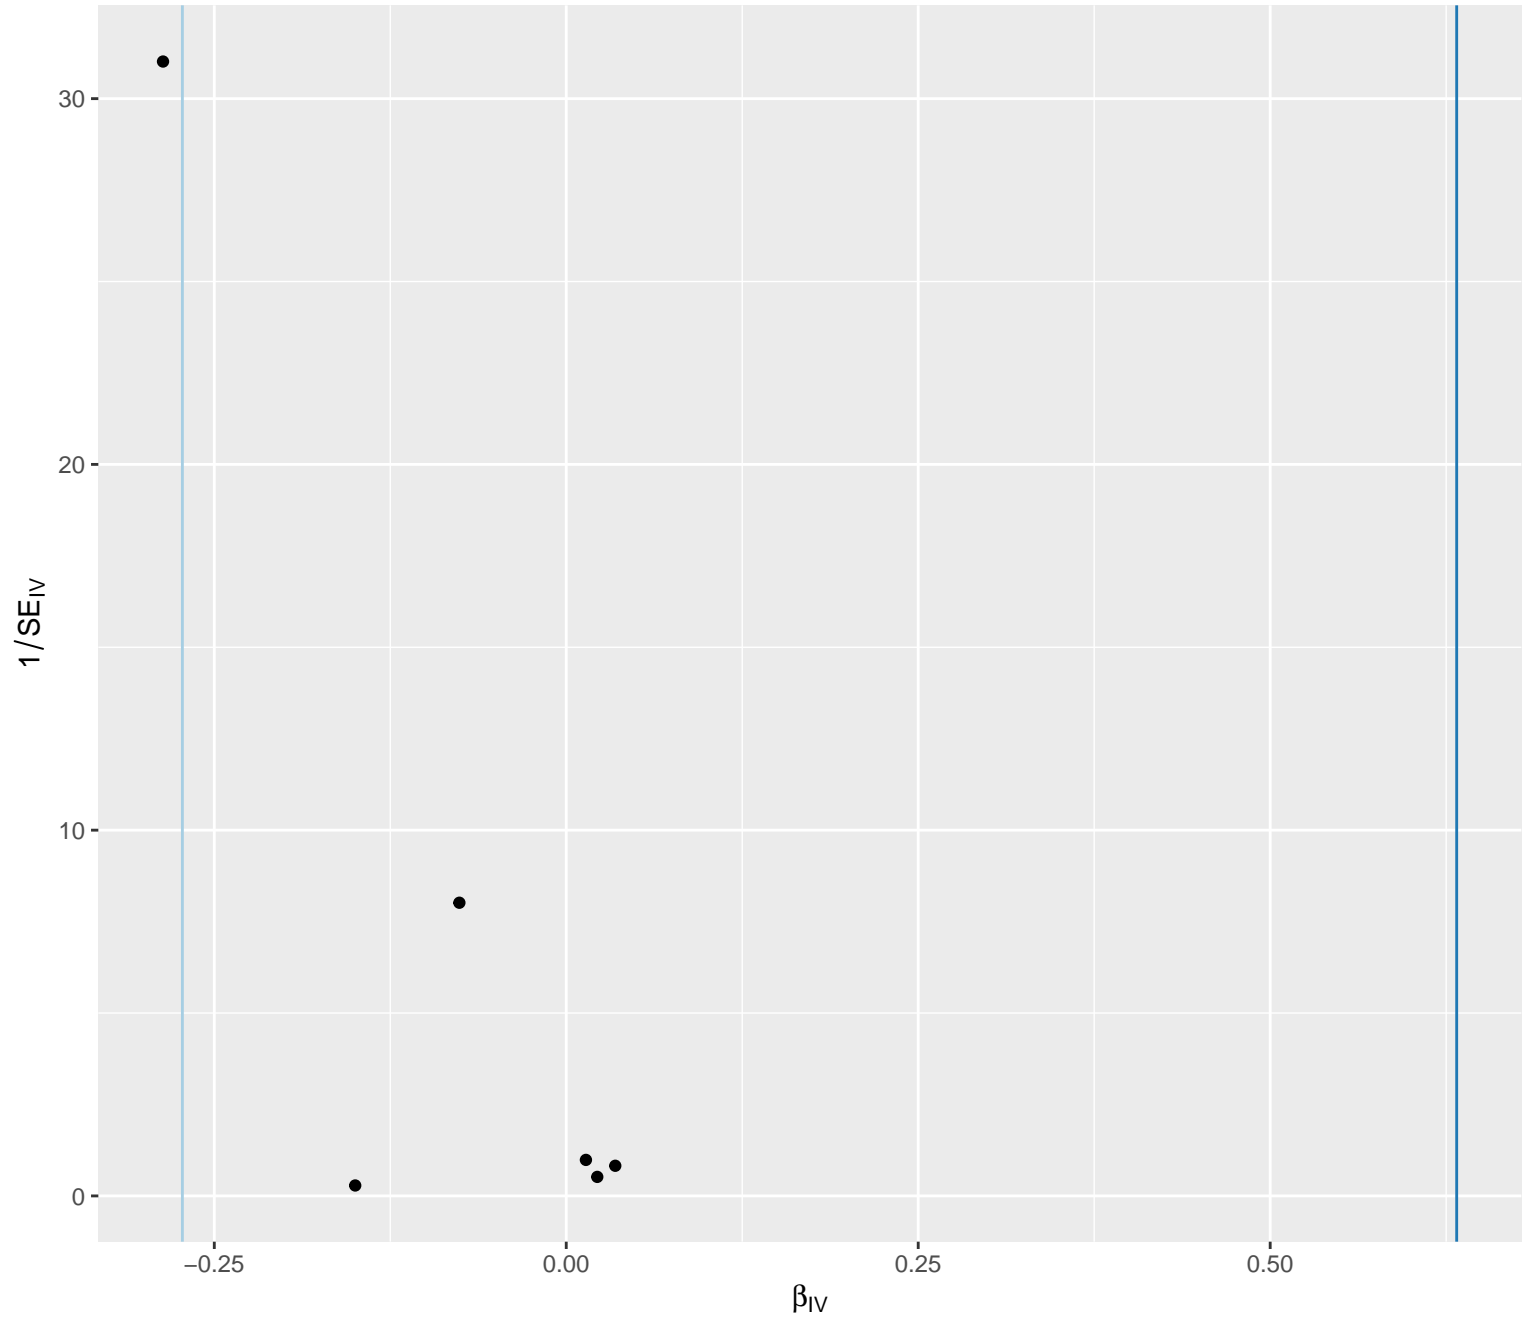

Funnel plot to assess heterogeneity between CD66b on Gr MDSC and ER+ breast cancer

MR Method

- Inverse variance weighted
- MR Egger

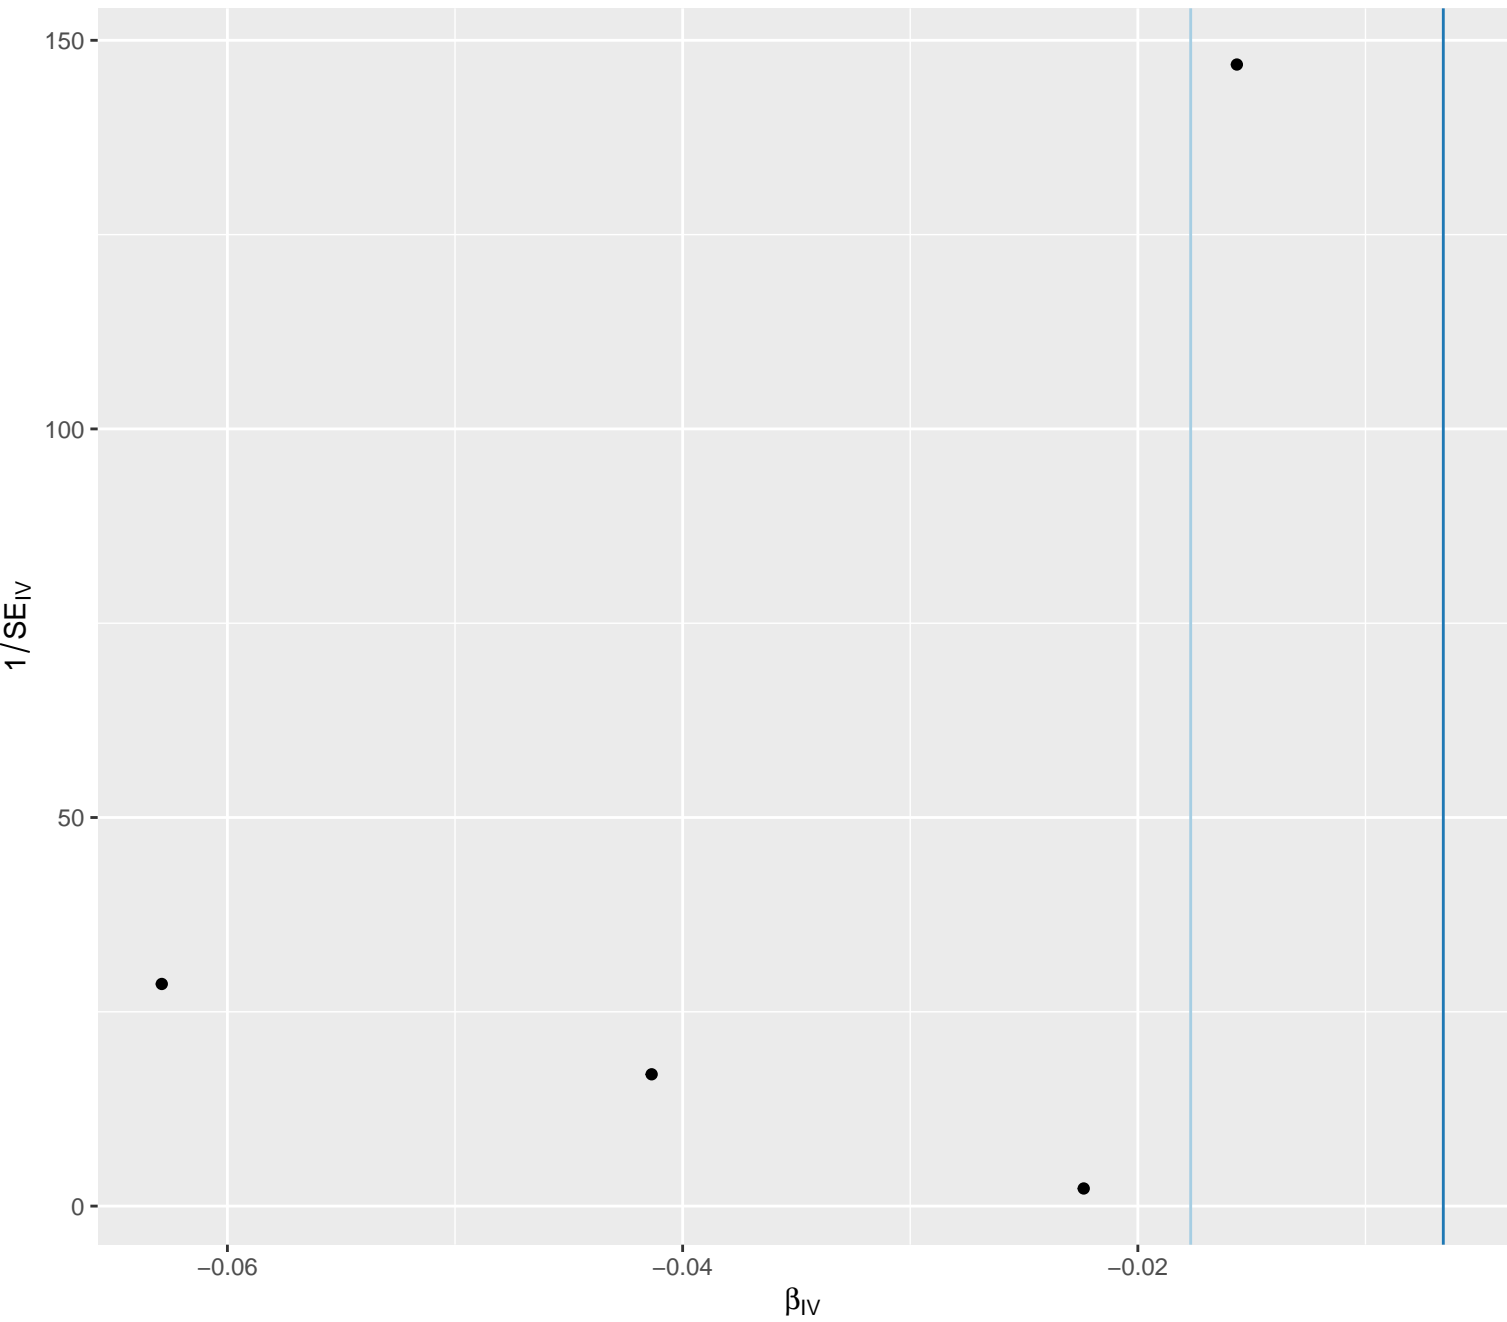

Funnel plot to assess heterogeneity between CD3 on naive CD8br and ER+ breast cancer

### MR Method

- Inverse variance weighted
- MR Egger

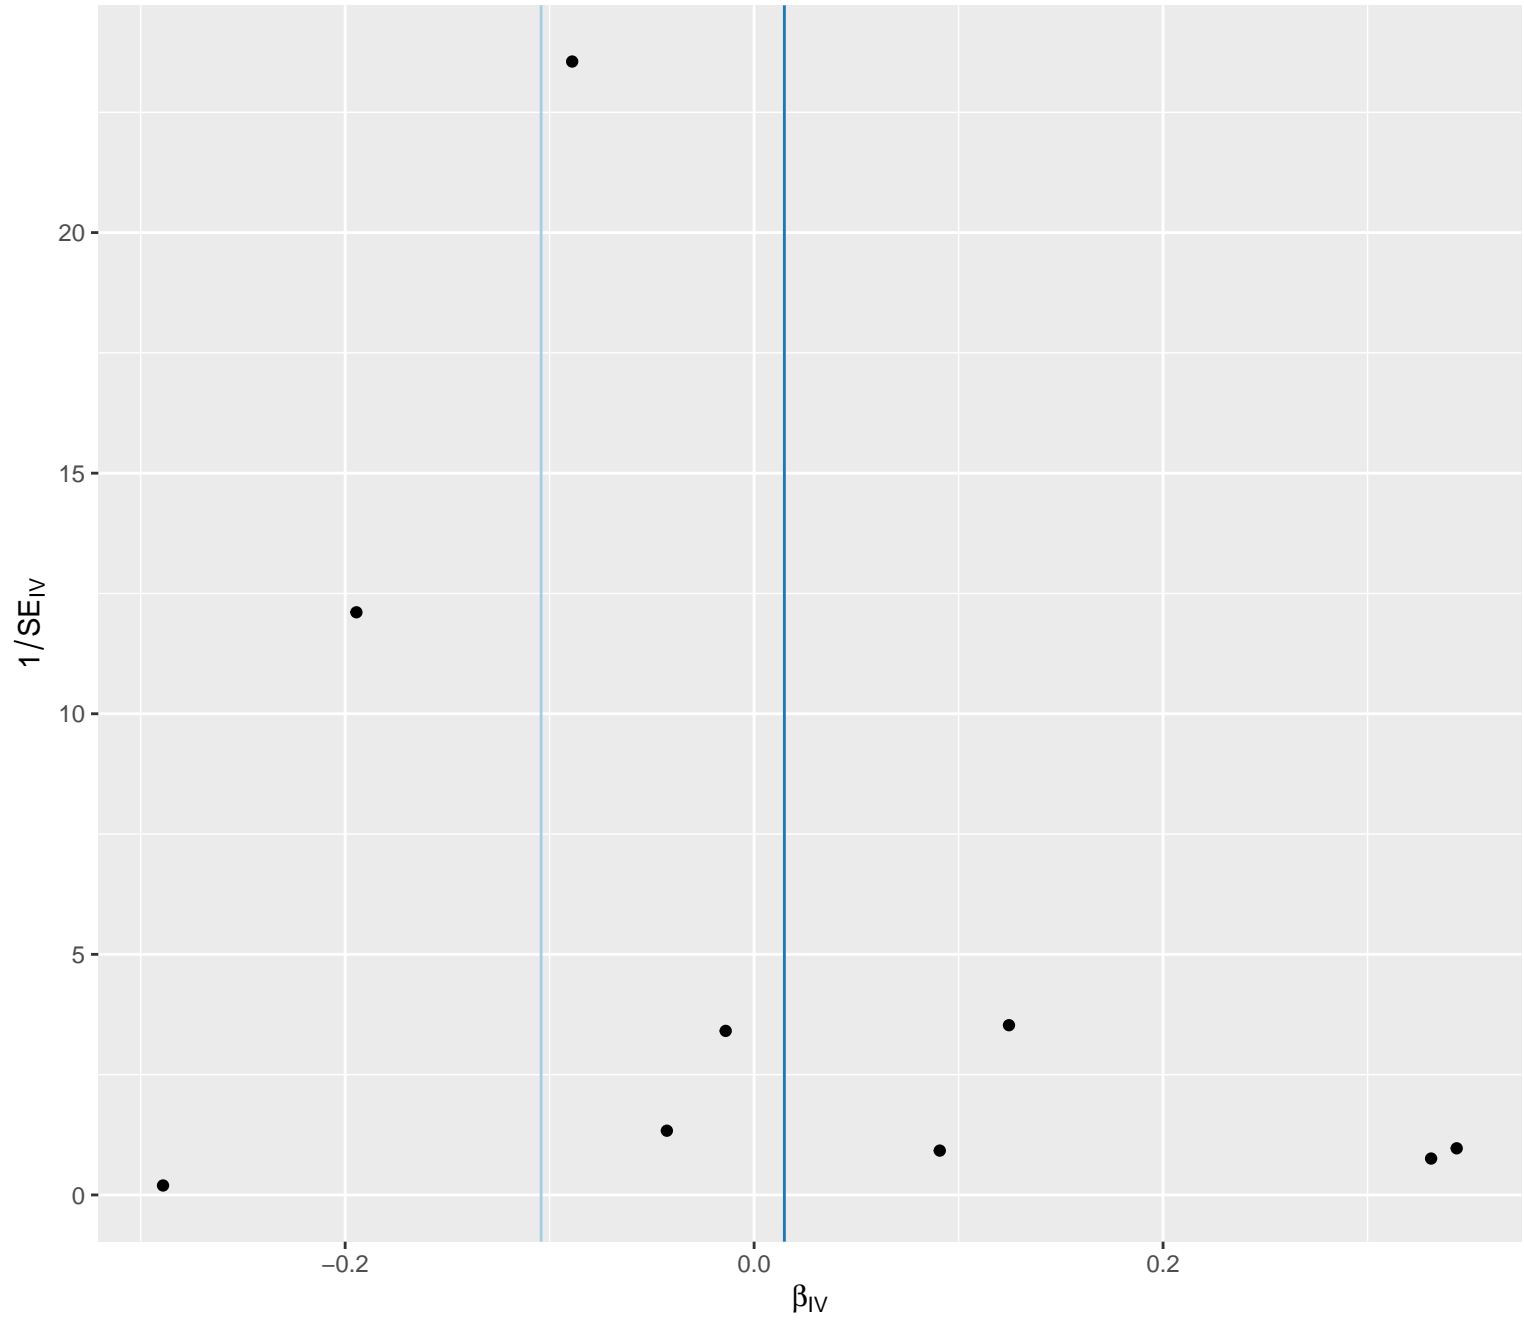

Funnel plot to assess heterogeneity between  
CD3 on NKT and ER+ breast cancer

MR Method

- Inverse variance weighted
- MR Egger

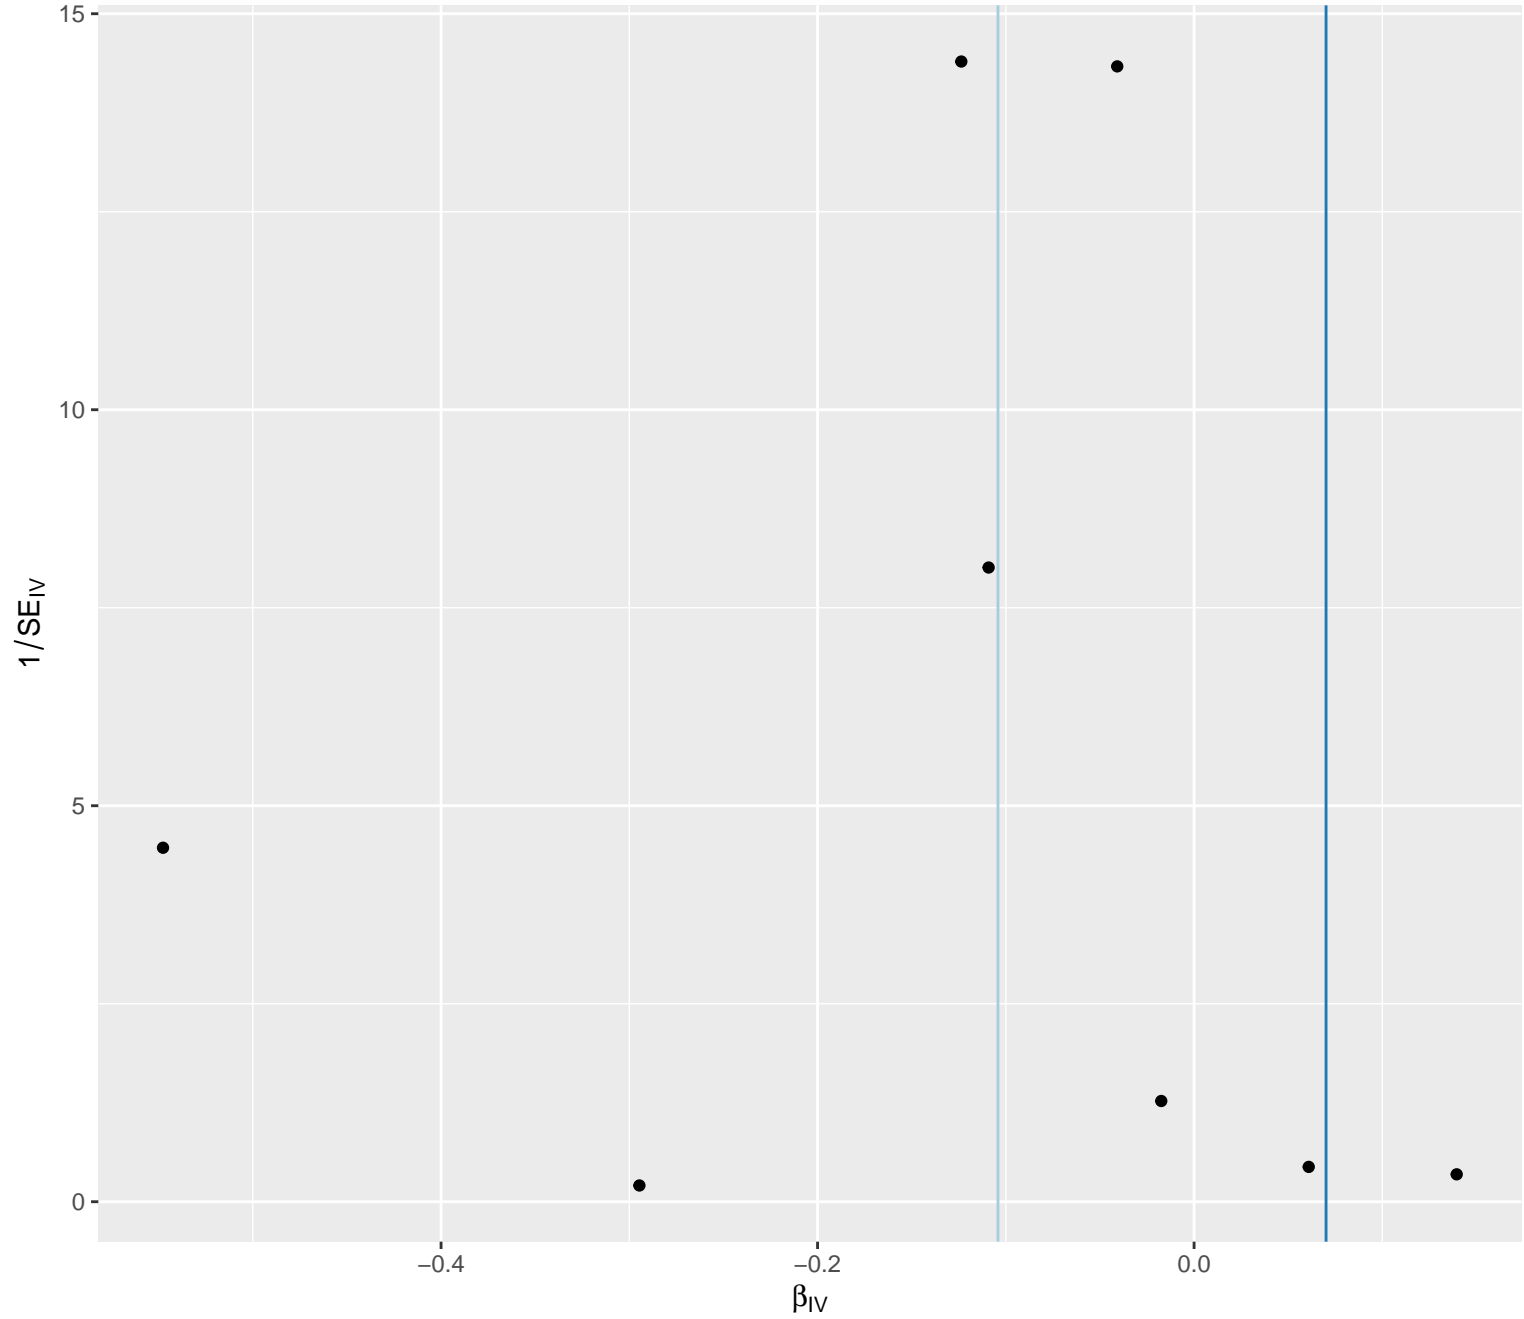

Funnel plot to assess heterogeneity between HVEM on naive CD8br and ER+ breast cancer

MR Method

- Inverse variance weighted
- MR Egger

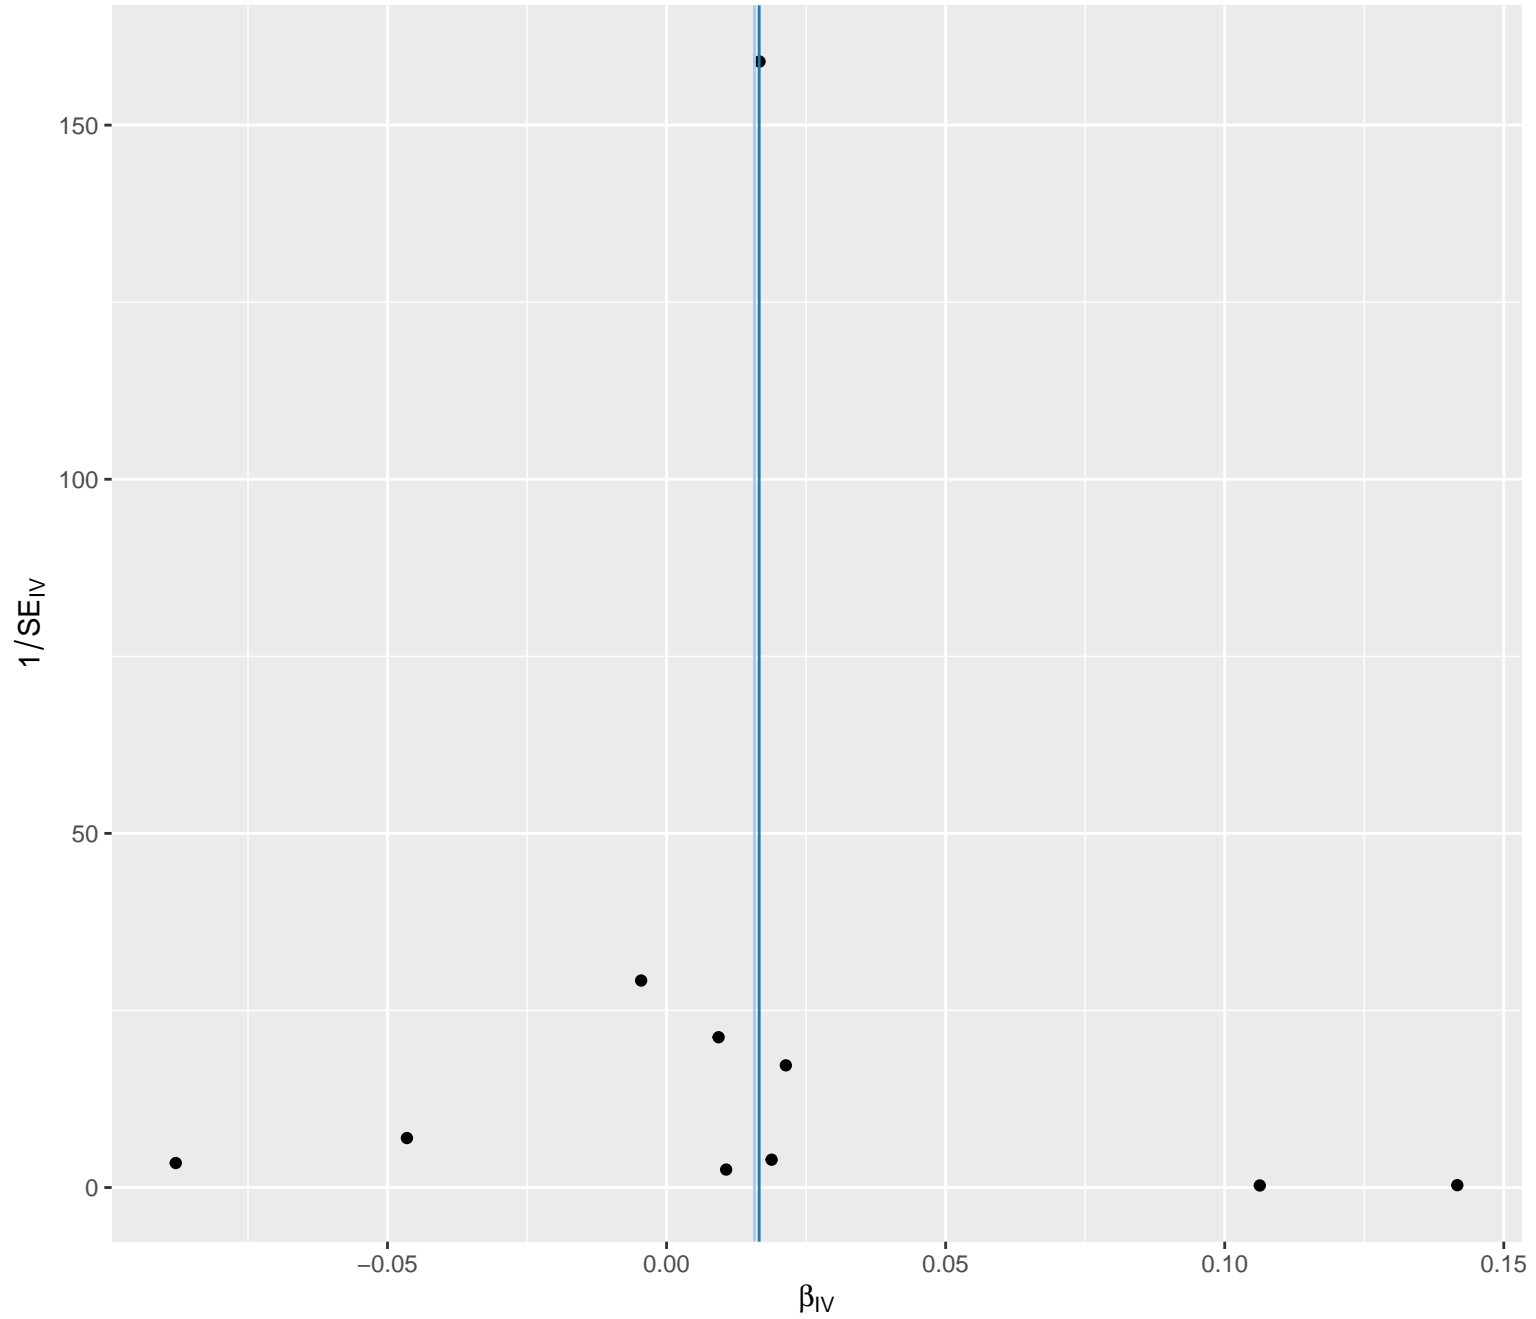



Funnel plot to assess heterogeneity between CD25 on resting Treg and ER+ breast cancer

MR Method

- Inverse variance weighted
- MR Egger

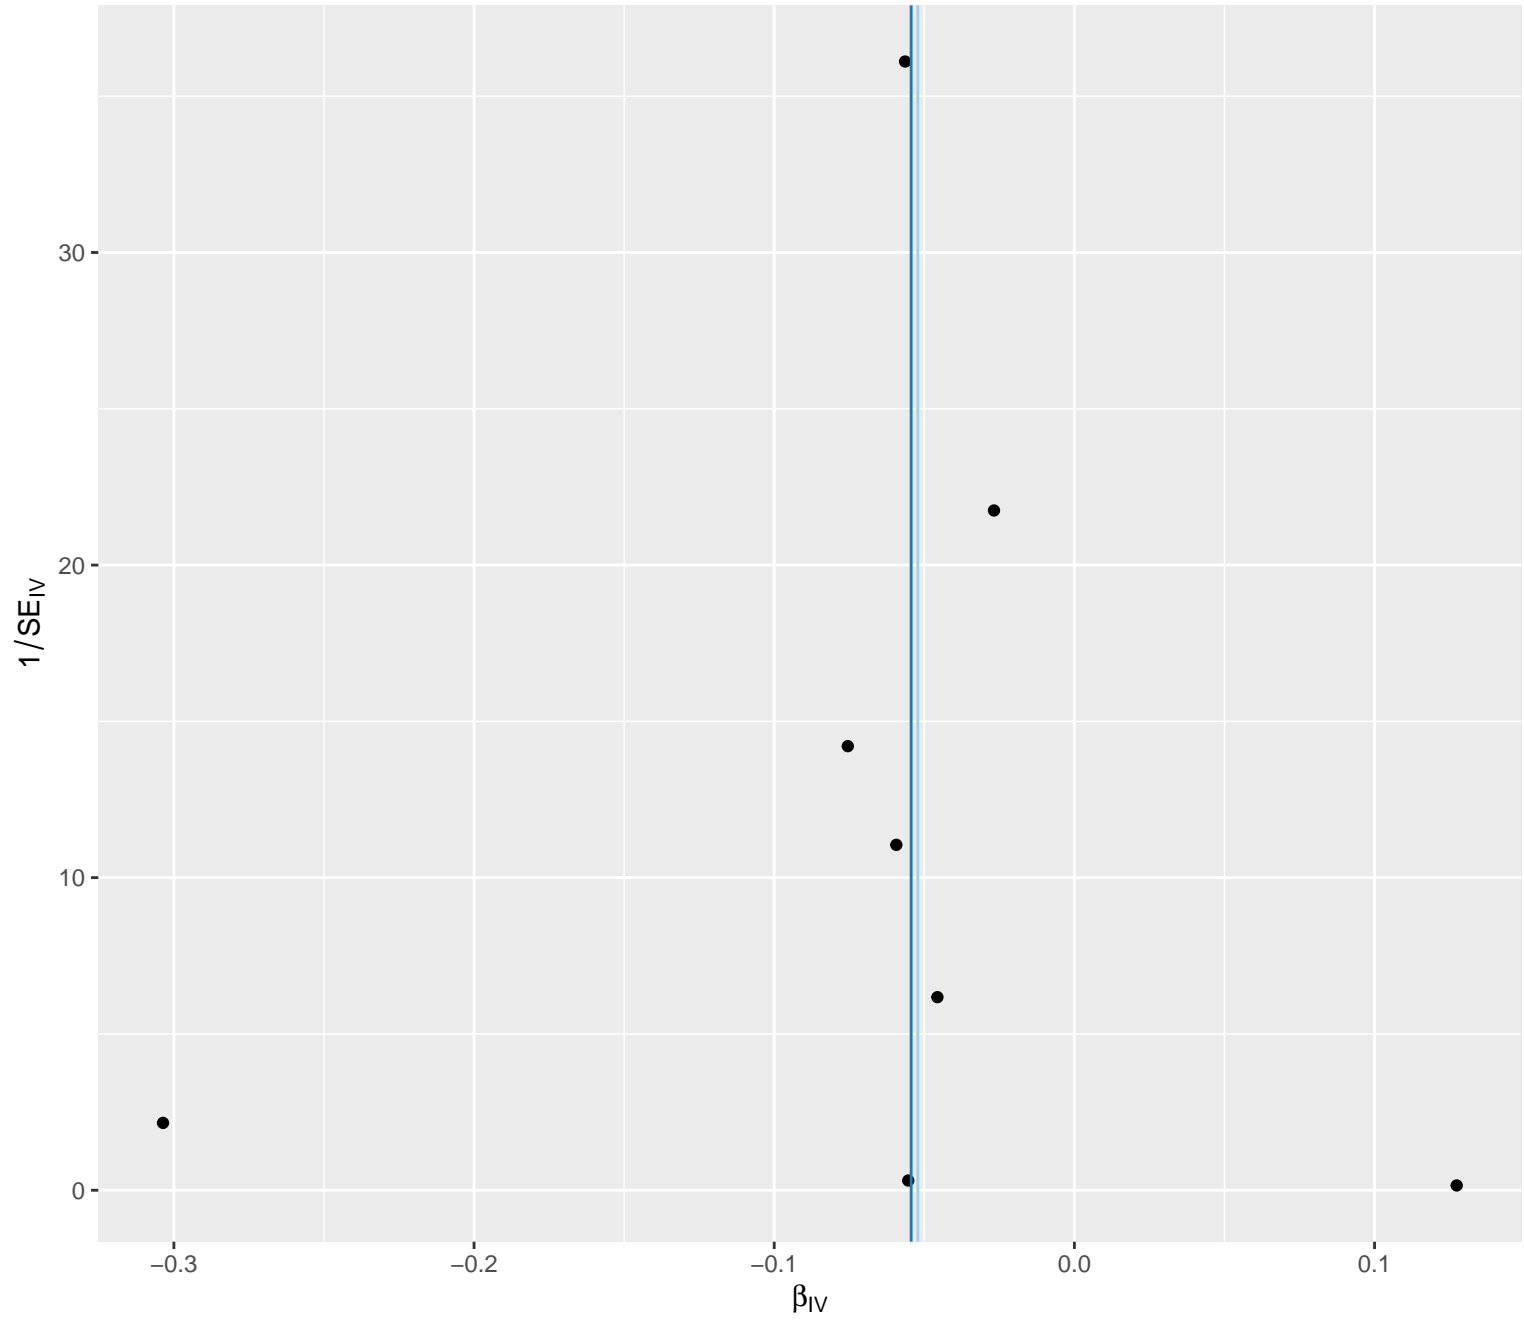

Funnel plot to assess heterogeneity between FSC-A on plasmacytoid DC and ER+ breast cancer

### MR Method

- Inverse variance weighted
- MR Egger

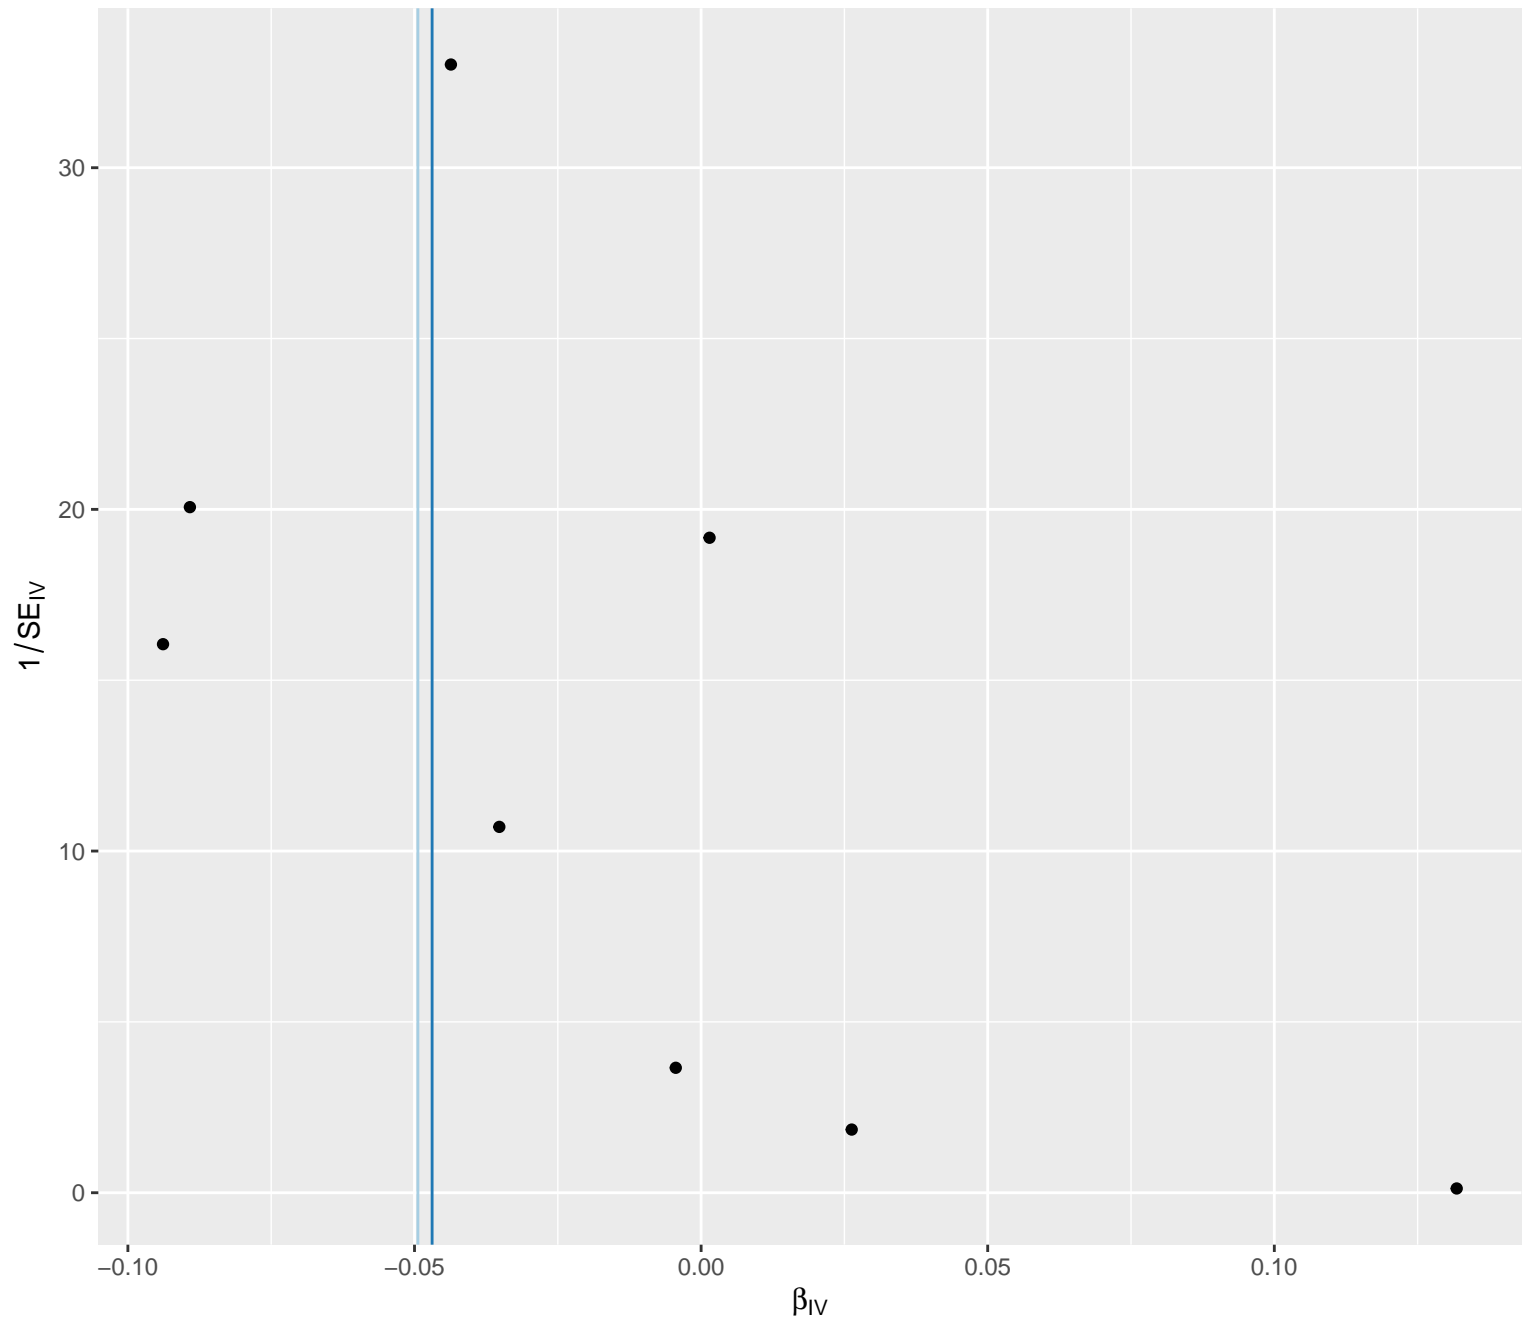

Funnel plot to assess heterogeneity between  
CCR2 on monocyte and ER+ breast cancer

### MR Method

- Inverse variance weighted
- MR Egger

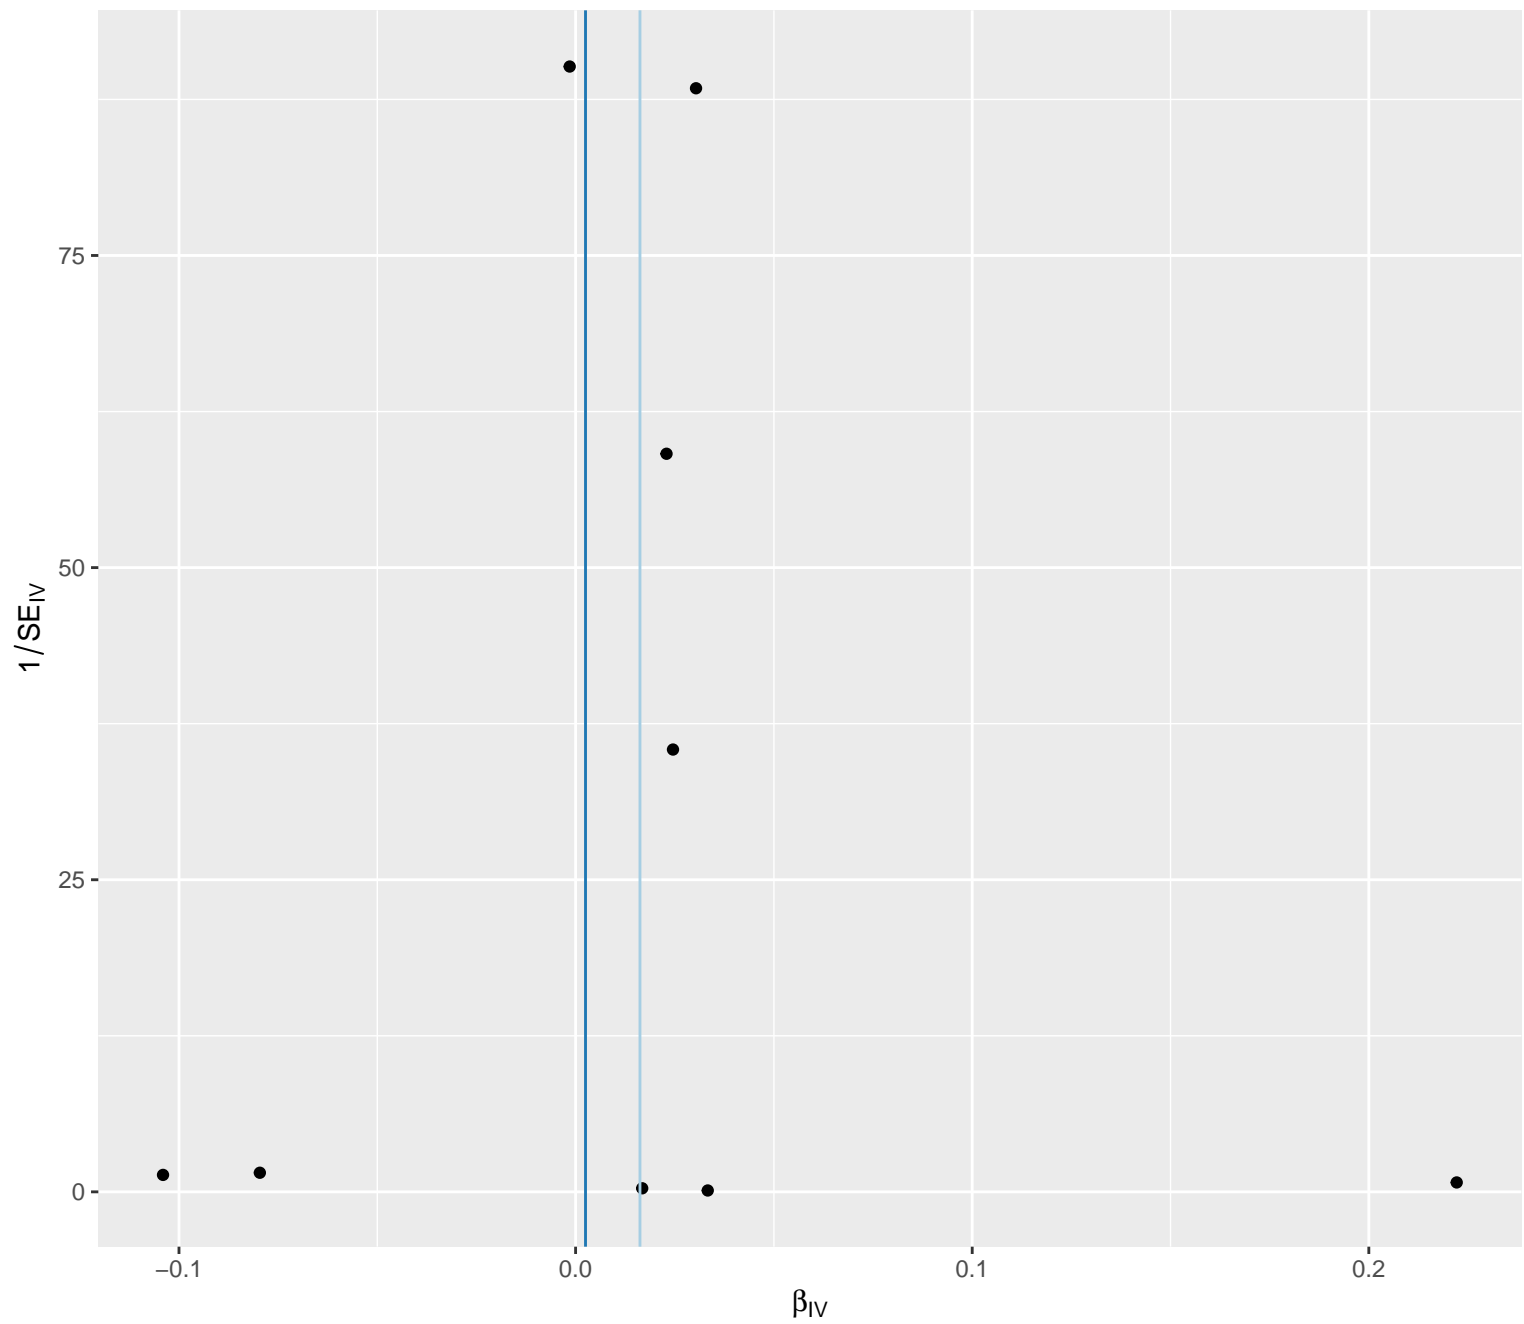

Funnel plot to assess heterogeneity between  
CD4 on CD4+ and ER+ breast cancer

### MR Method

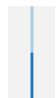

Inverse variance weighted

MR Egger

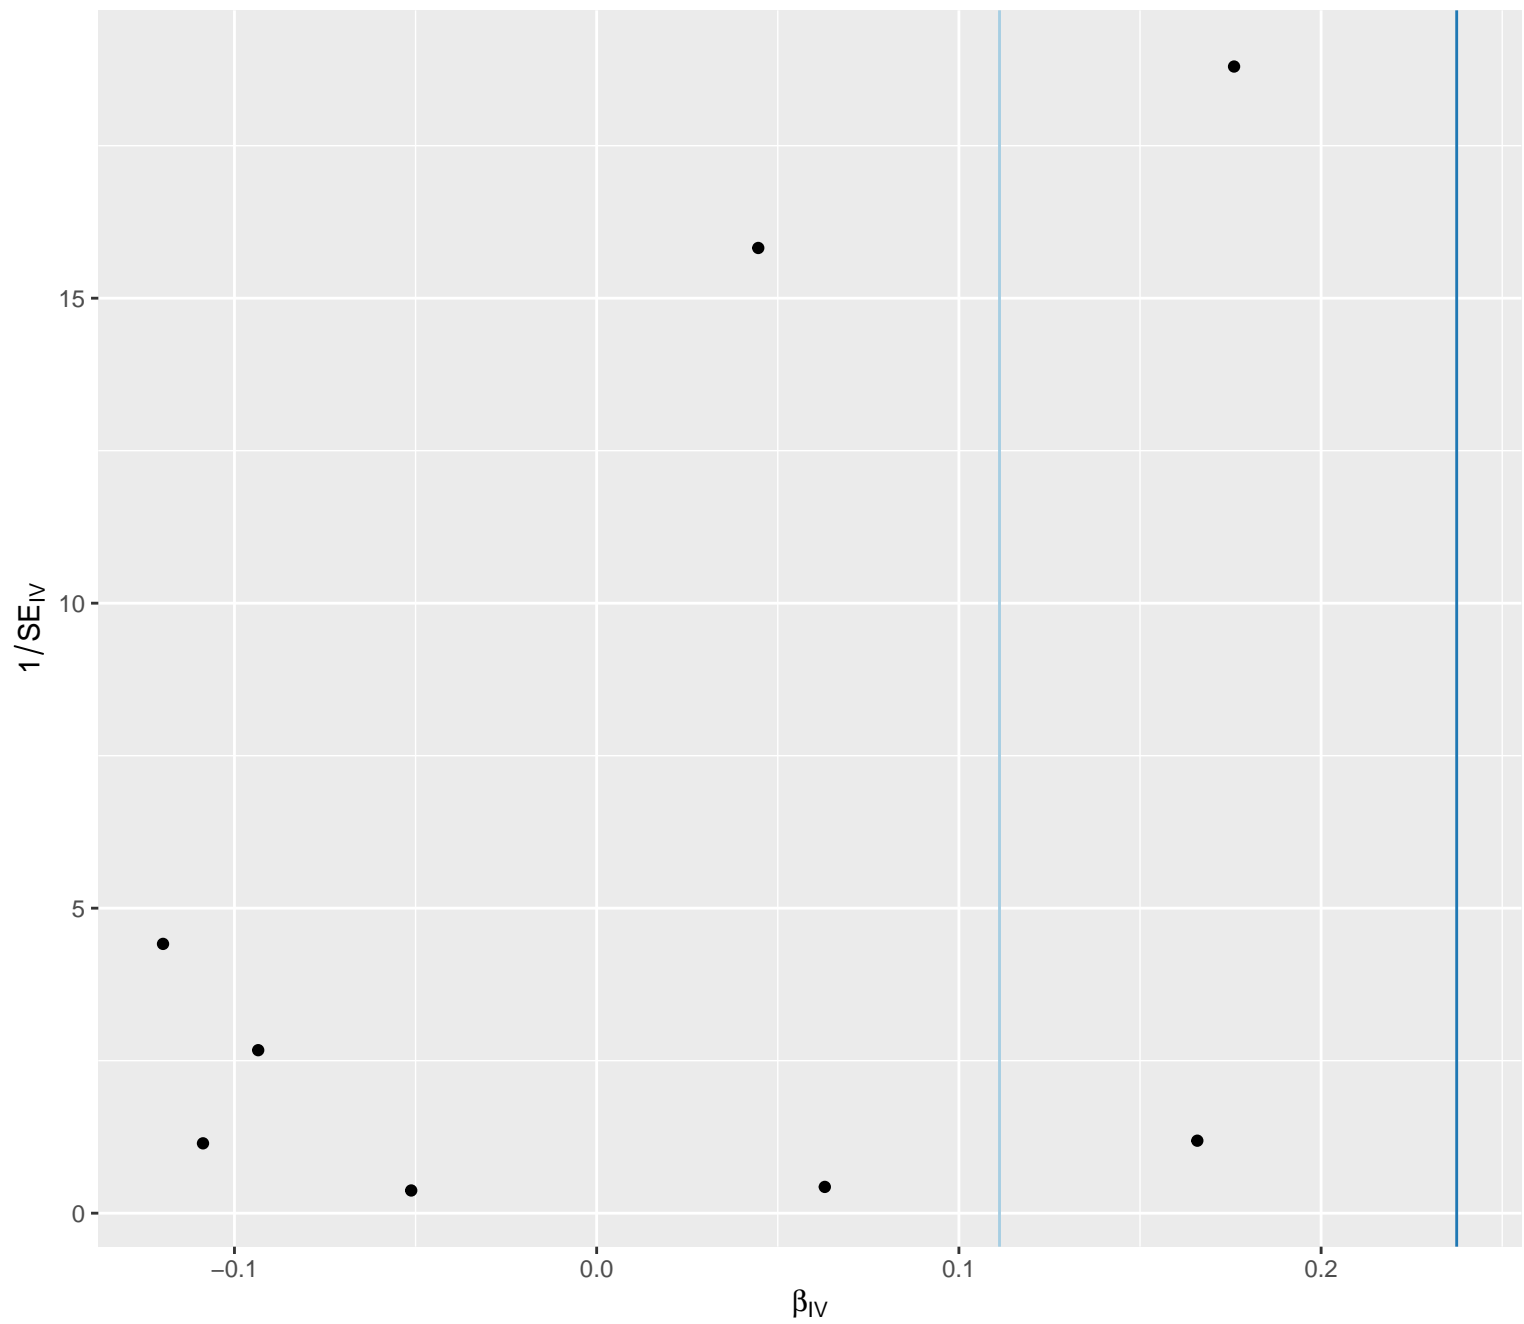

Funnel plot to assess heterogeneity between  
CD11b on CD33dim HLA DR-  
and ER+ breast cancer

MR Method

- Inverse variance weighted
- MR Egger

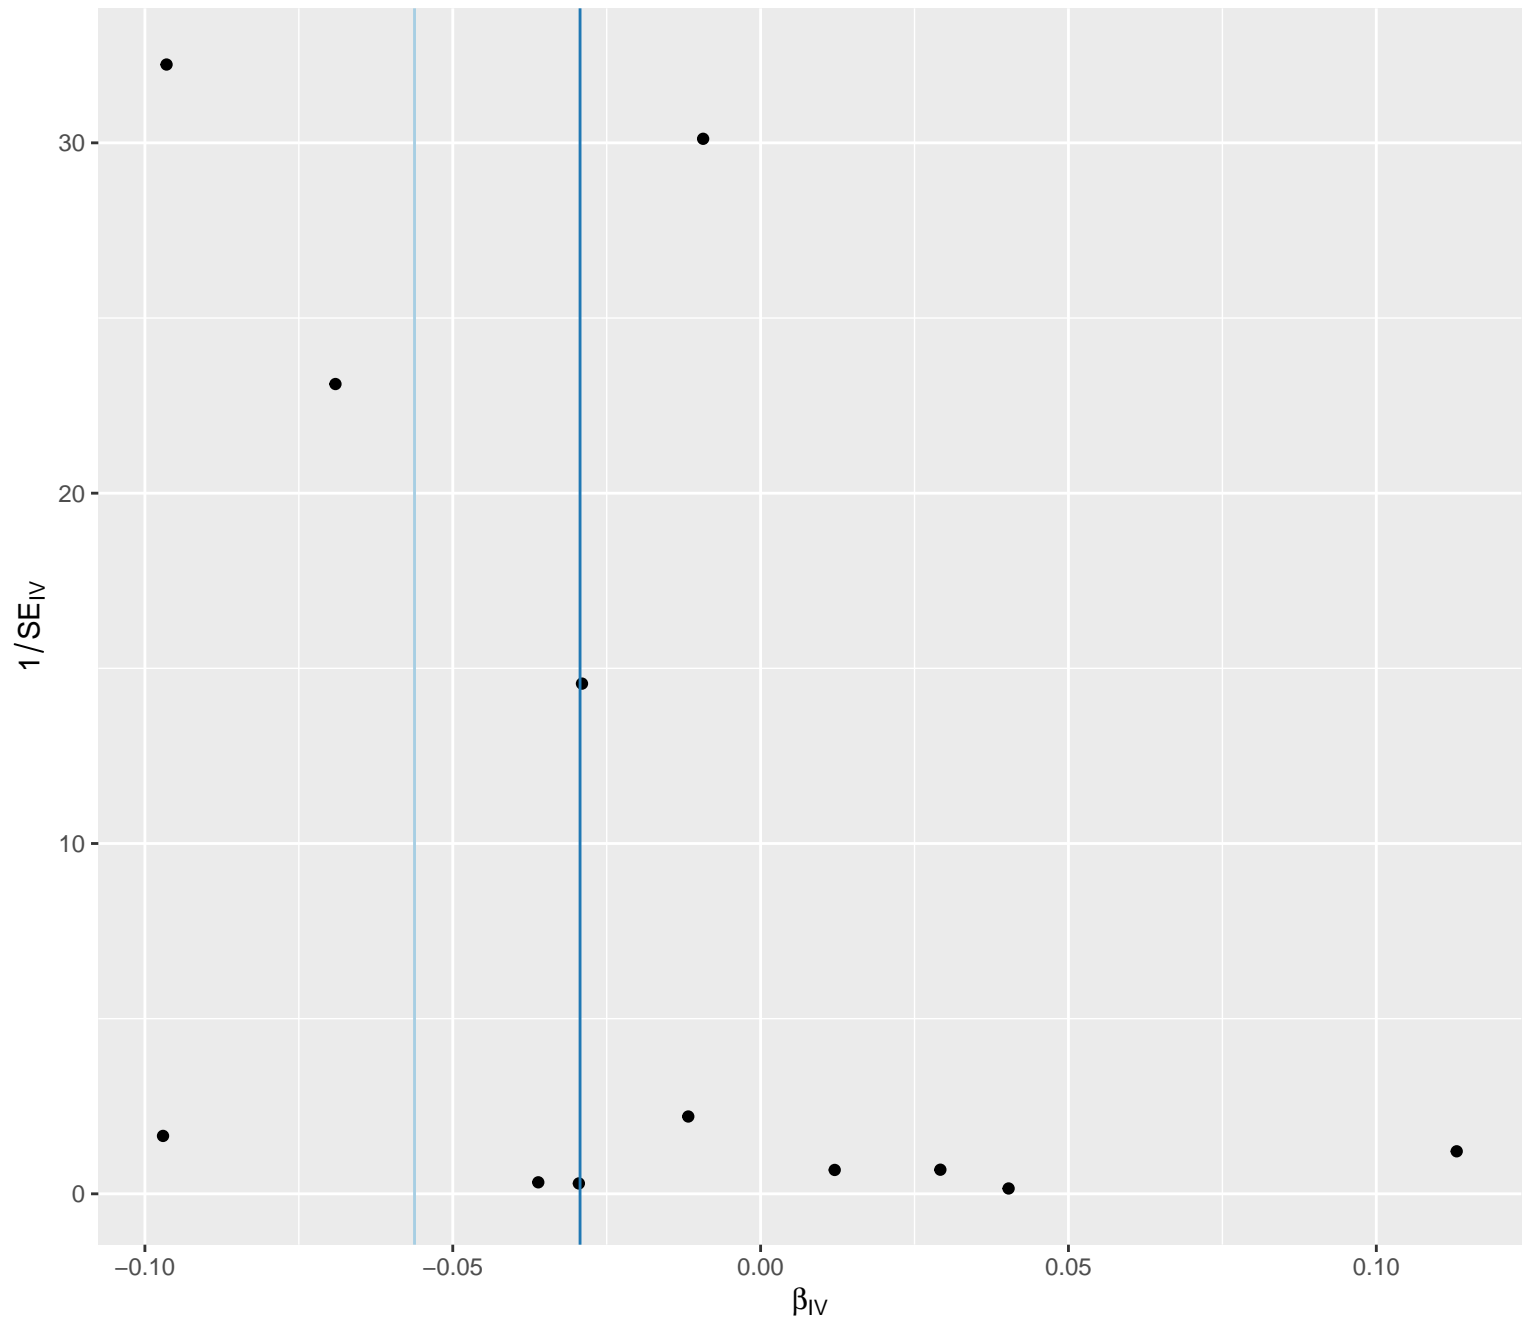

Funnel plot to assess heterogeneity between HLA DR on CD33- HLA DR+ and ER+ breast cancer

### MR Method

- Inverse variance weighted
- MR Egger

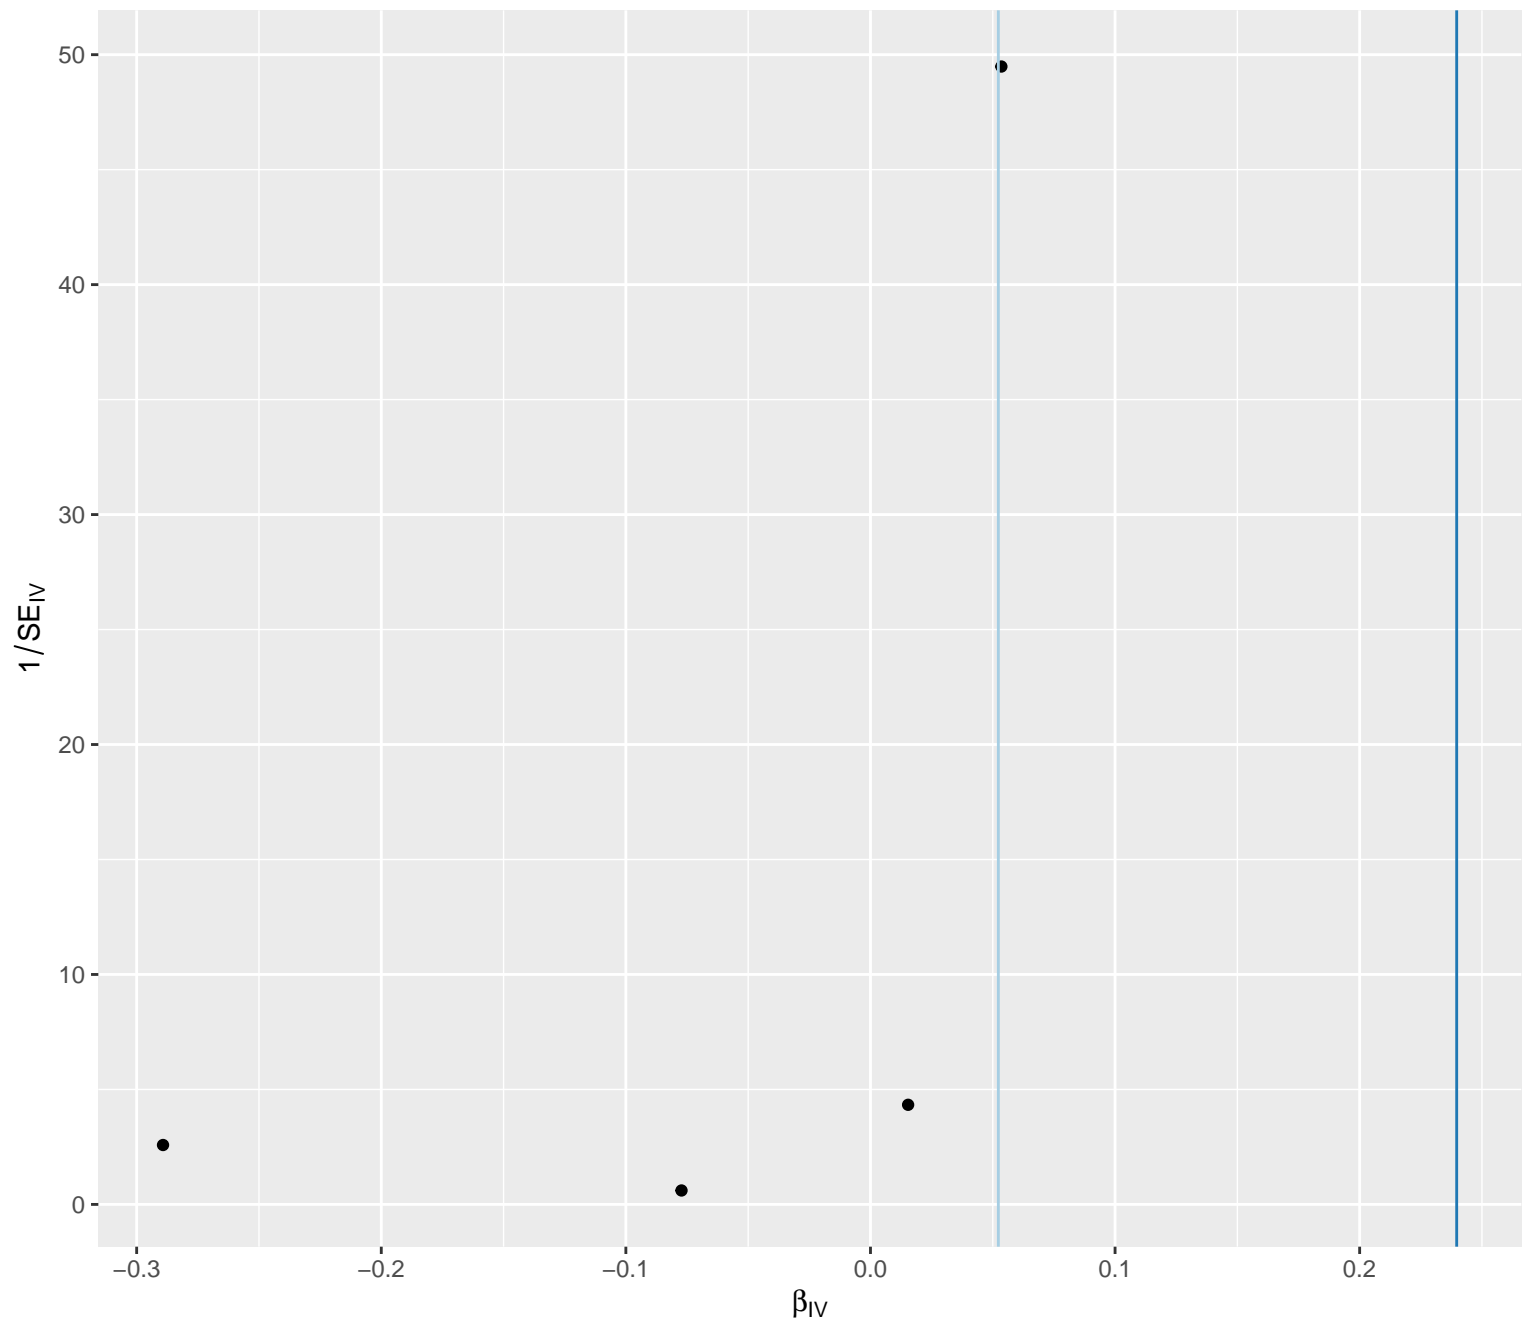

### MR Method

Funnel plot to assess heterogeneity between CD45RA+ CD8br %T cell and ER- breast cancer

- Inverse variance weighted
- MR Egger

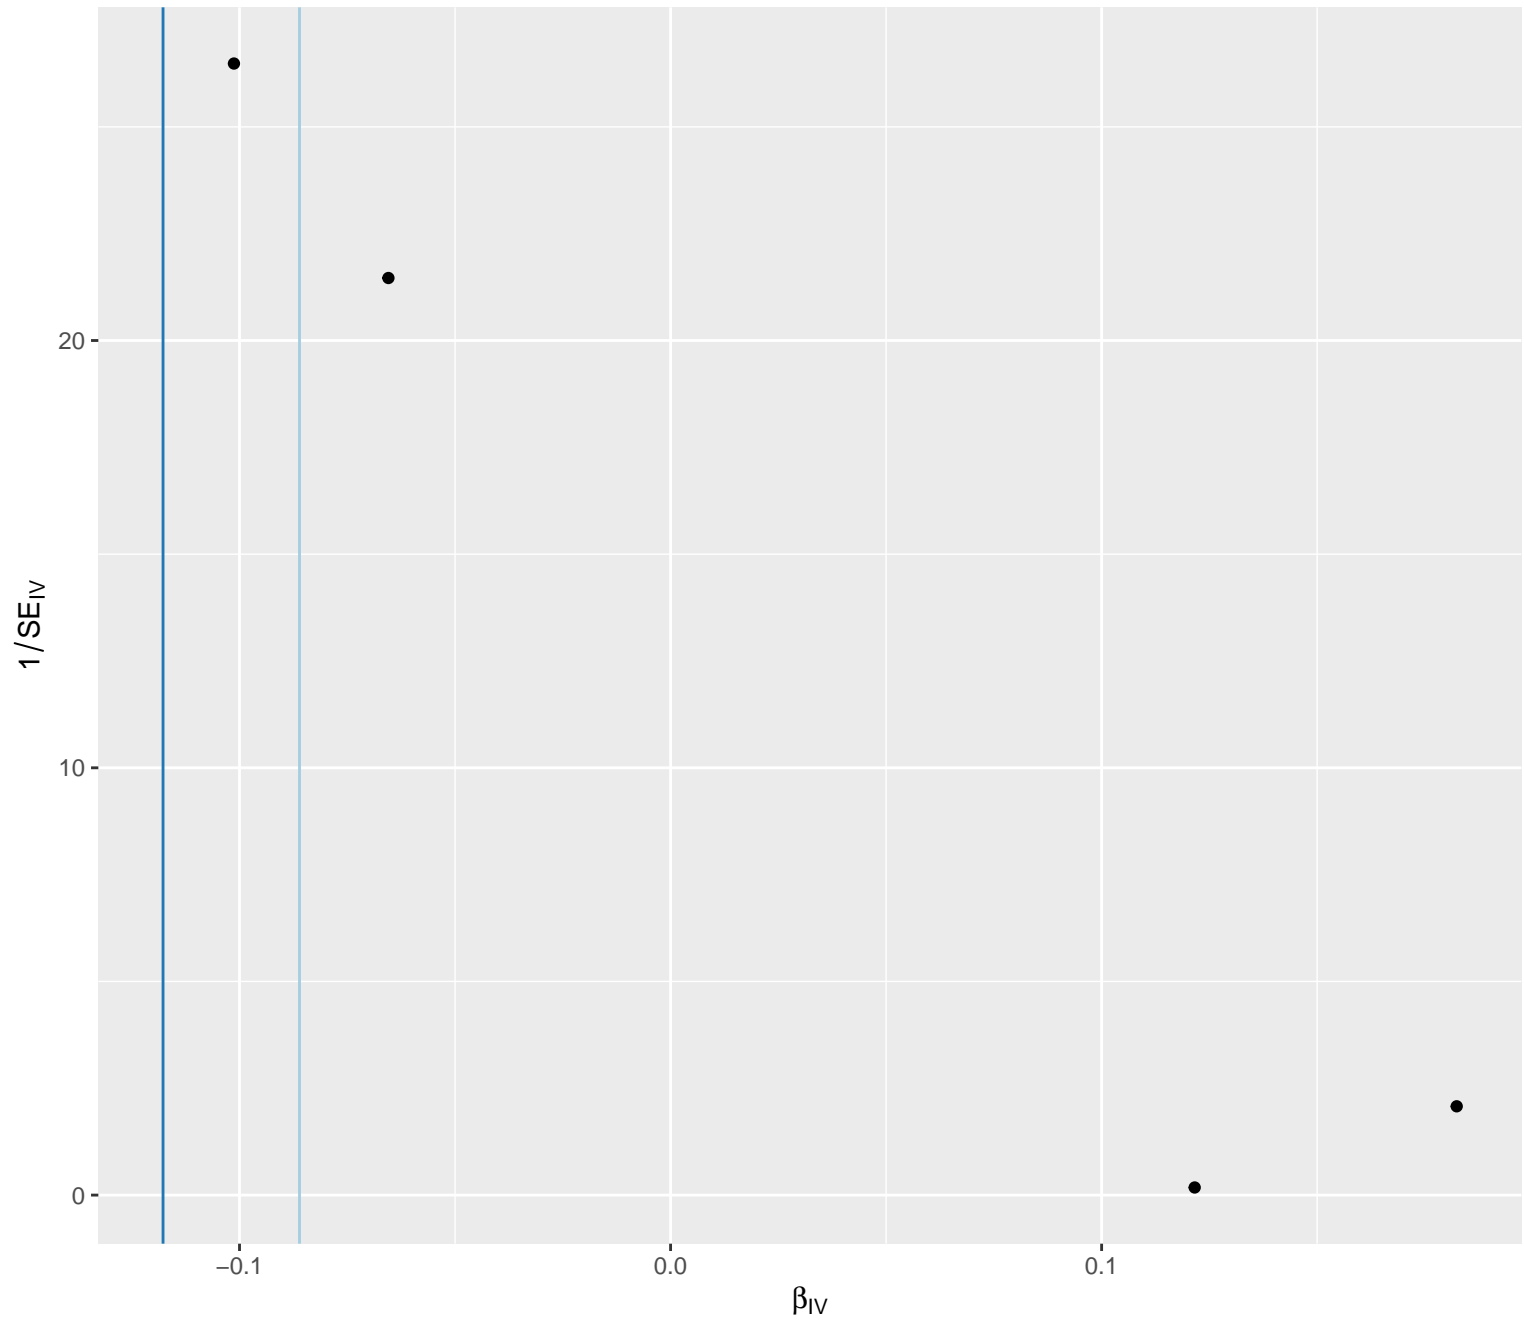

Funnel plot to assess heterogeneity between CD3 on CM CD4+ and ER- breast cancer

MR Method

- Inverse variance weighted
- MR Egger

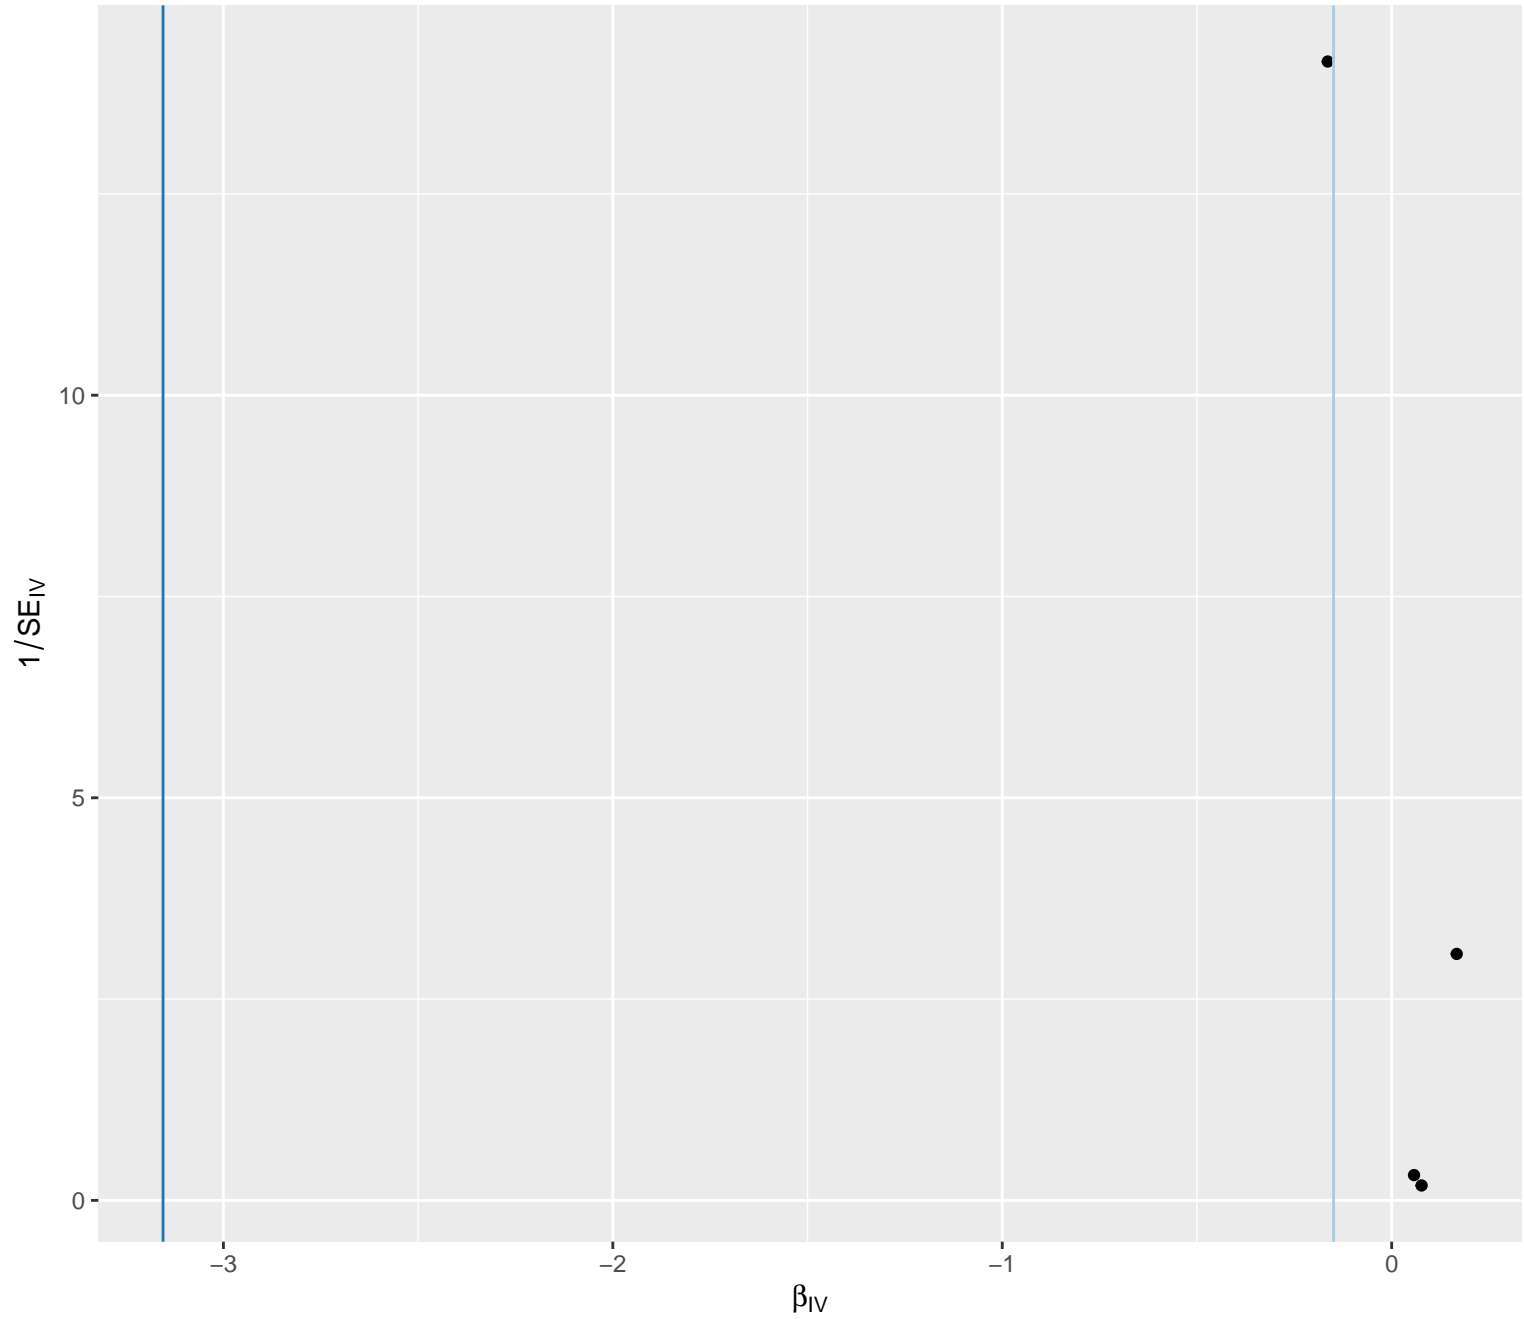



Funnel plot to assess heterogeneity between  
CD3 on T cell and ER- breast cancer

### MR Method

- Inverse variance weighted
- MR Egger

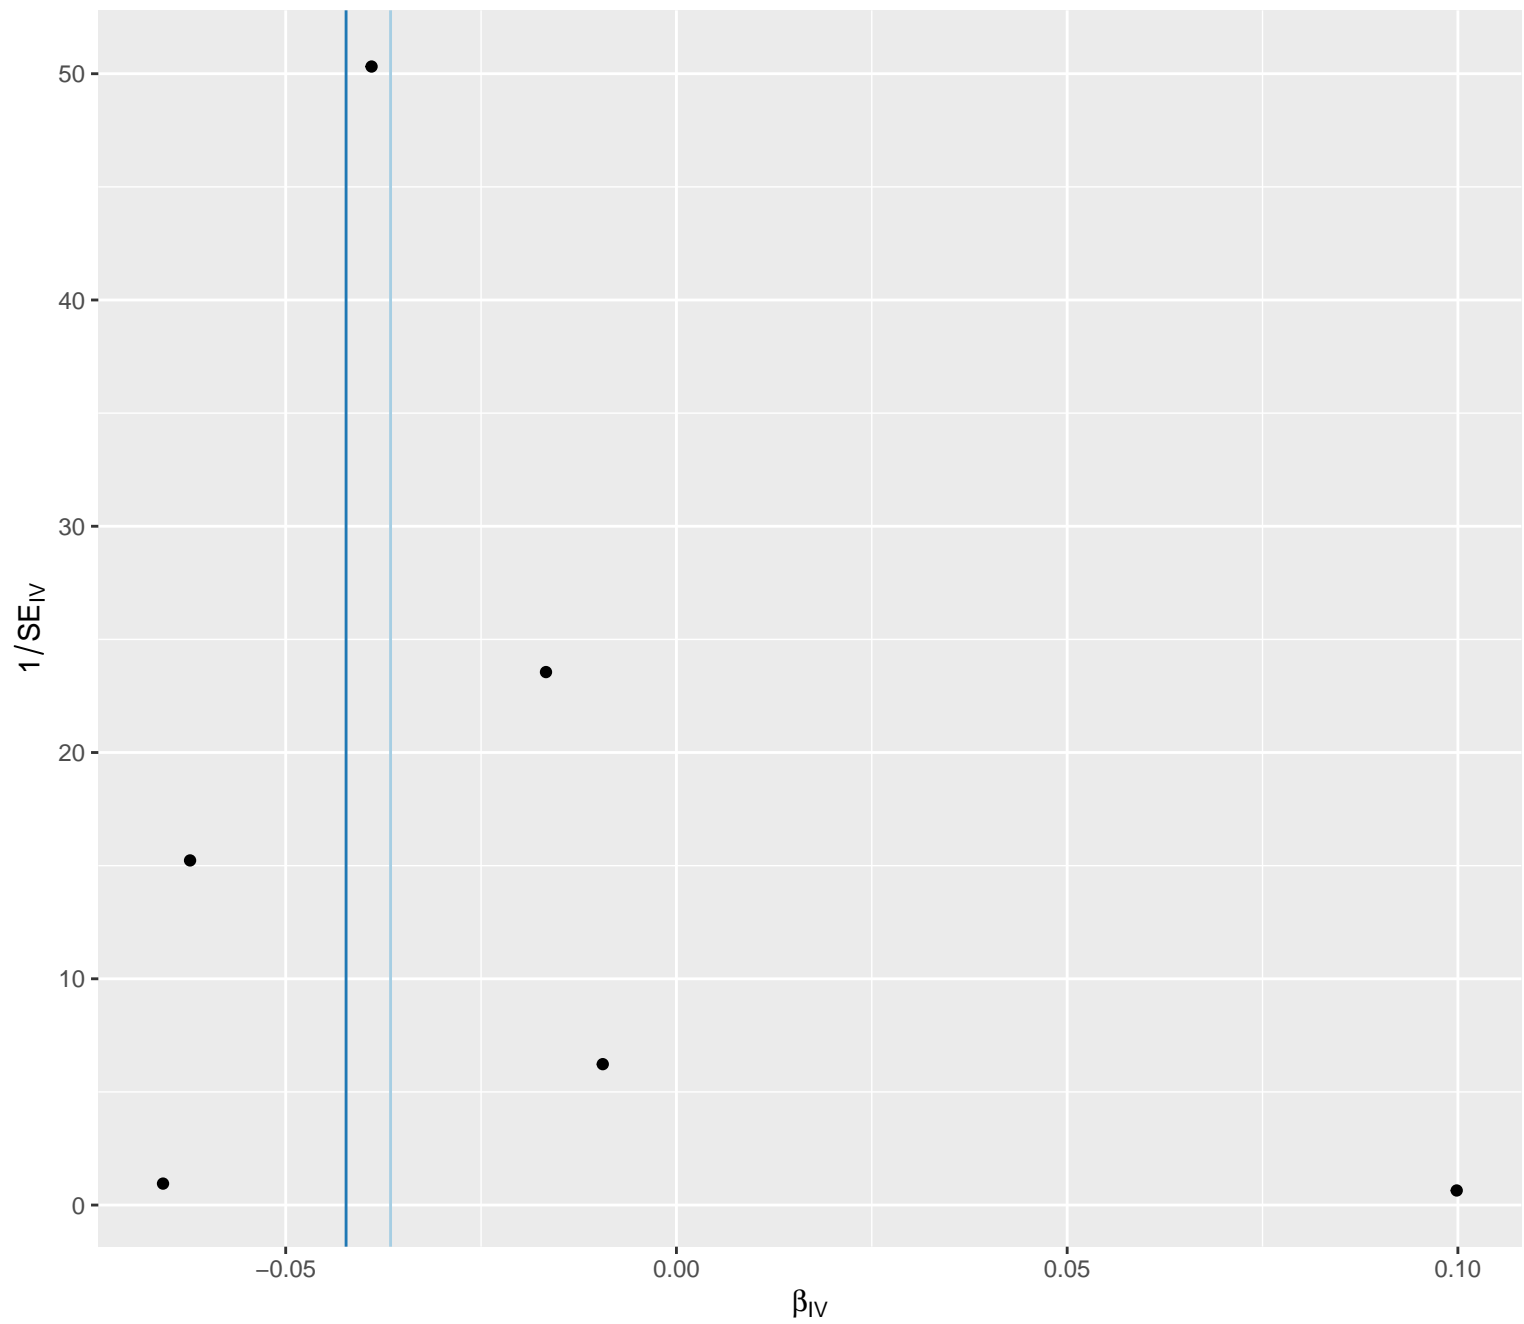

Funnel plot to assess heterogeneity between  
CD3 on CD39+ secreting Treg  
and ER- breast cancer

### MR Method

- Inverse variance weighted
- MR Egger

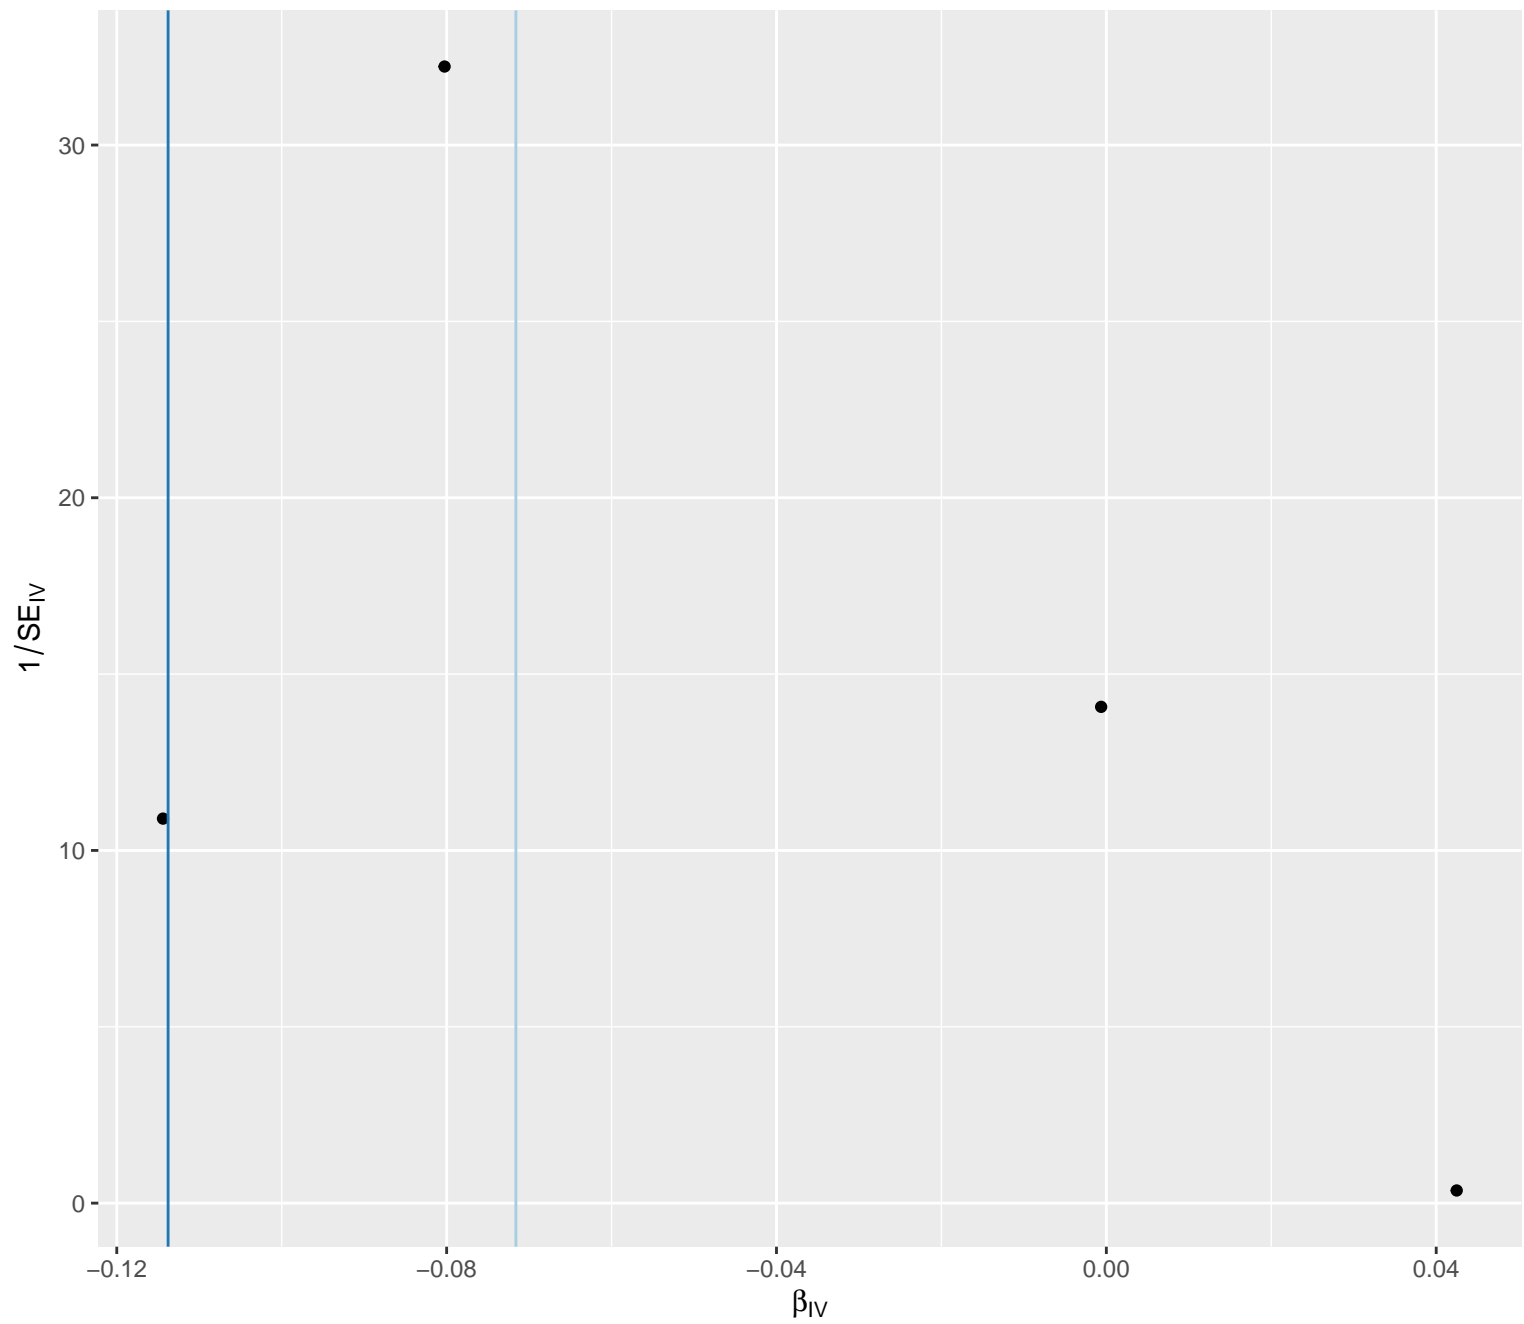

Funnel plot to assess heterogeneity between  
CD3 on resting Treg and ER- breast cancer

### MR Method

- Inverse variance weighted
- MR Egger

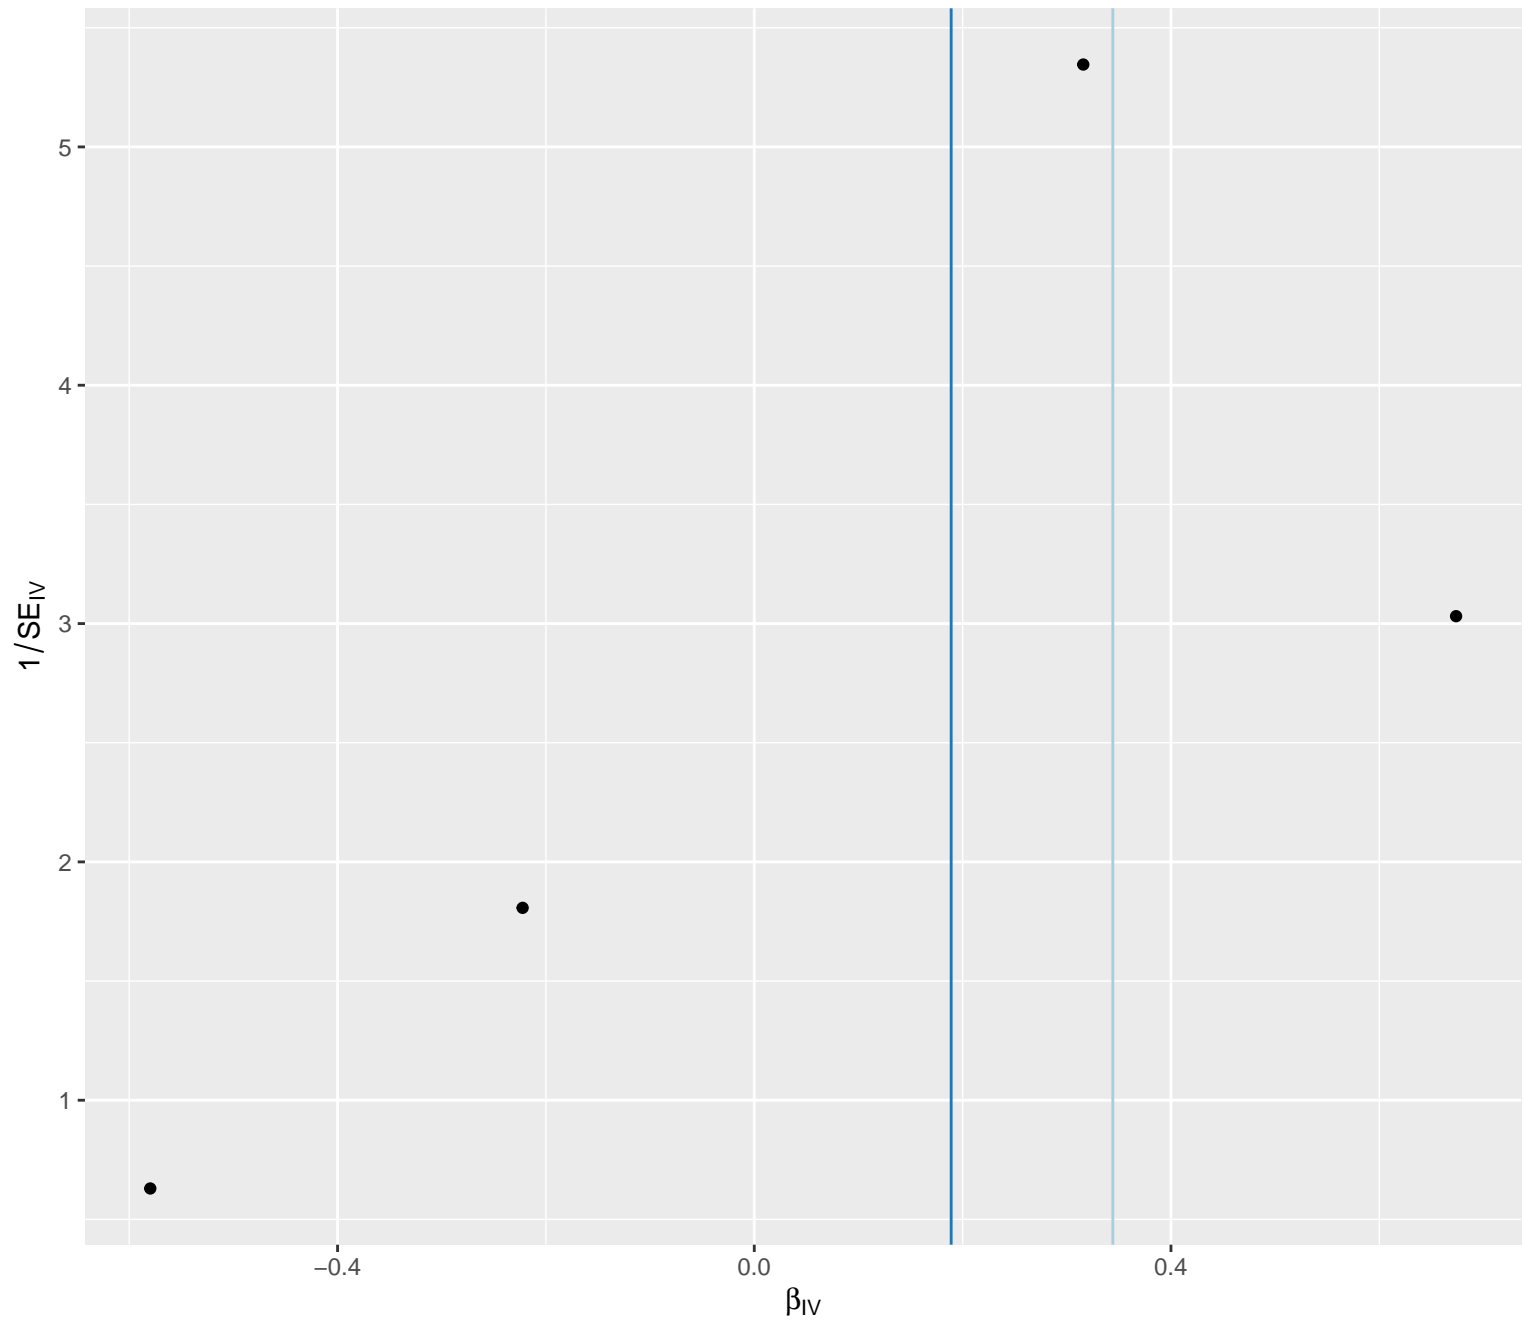

### MR Method

- Inverse variance weighted
- MR Egger

Funnel plot to assess heterogeneity between ICX3CR1 on CD14+ CD16- monocyte and ER- breast cancer

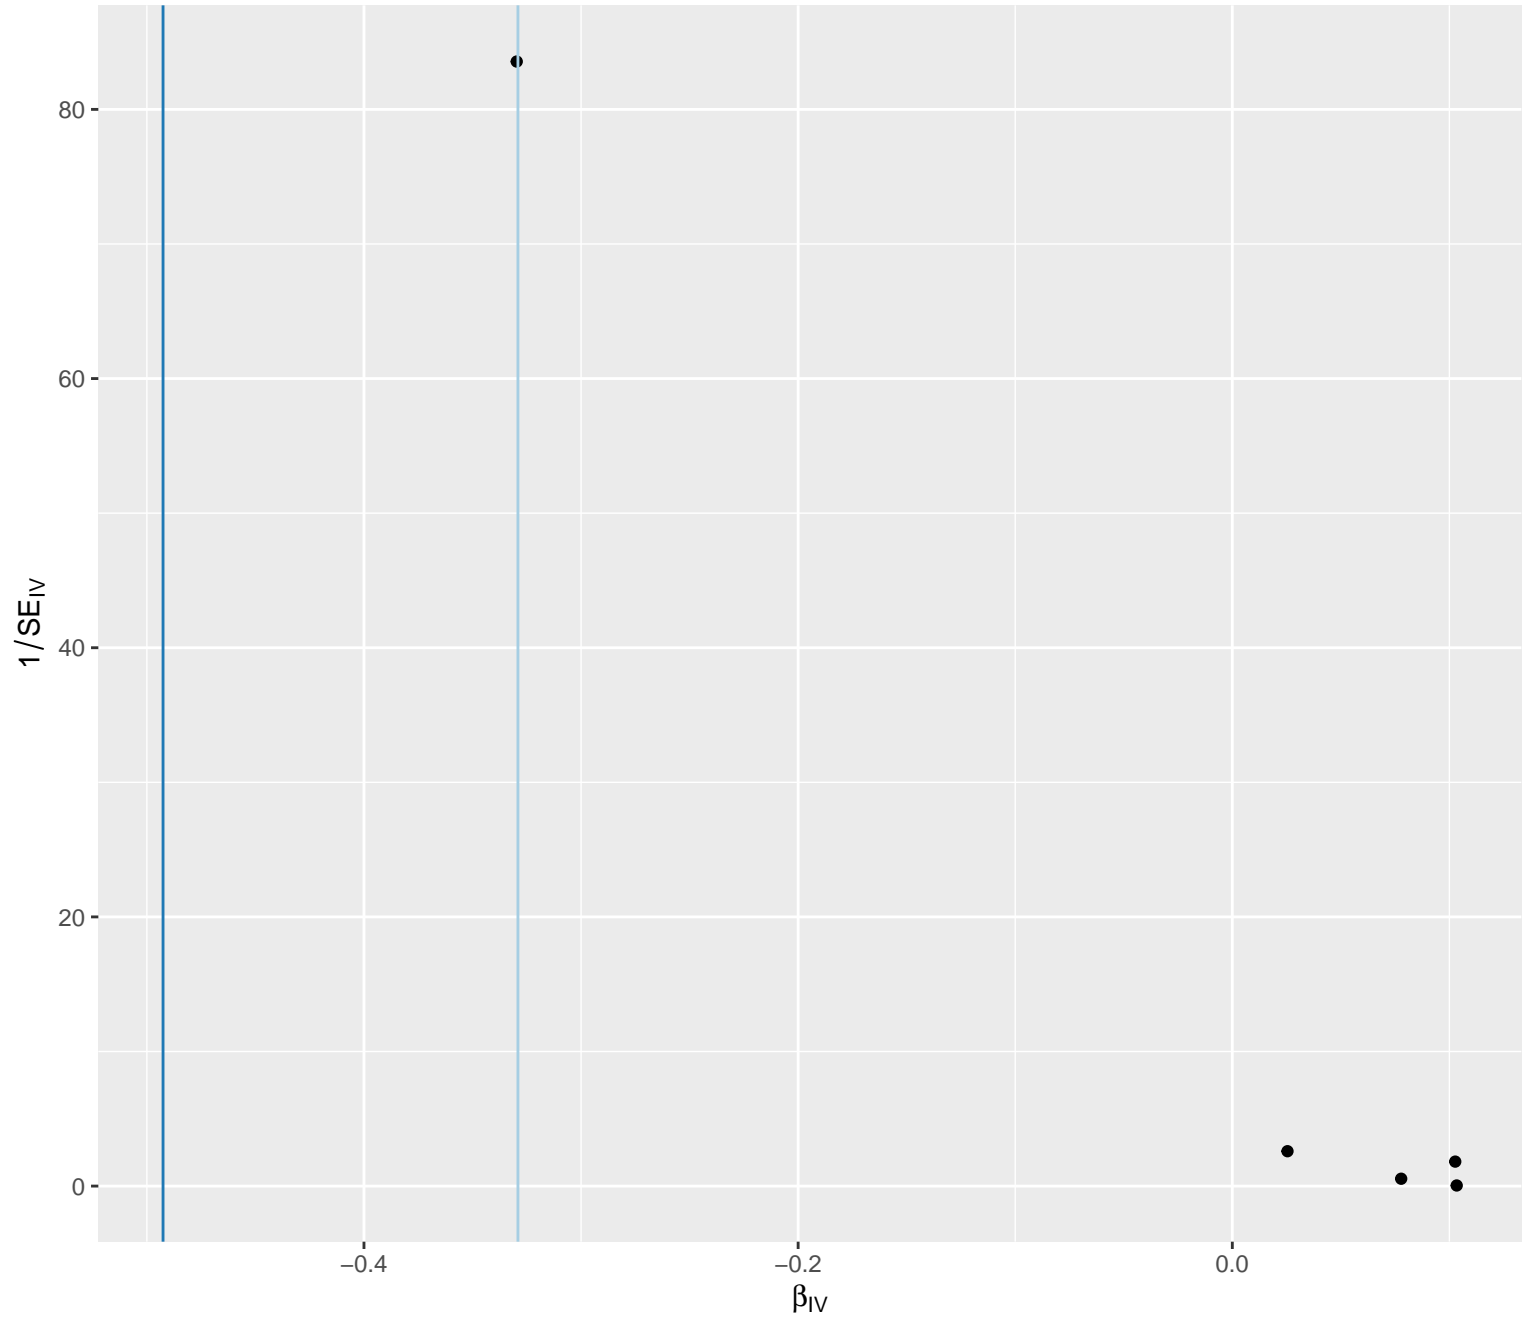

Funnel plot to assess heterogeneity between  
SSC-A on T cell and ER- breast cancer

MR Method

- Inverse variance weighted
- MR Egger

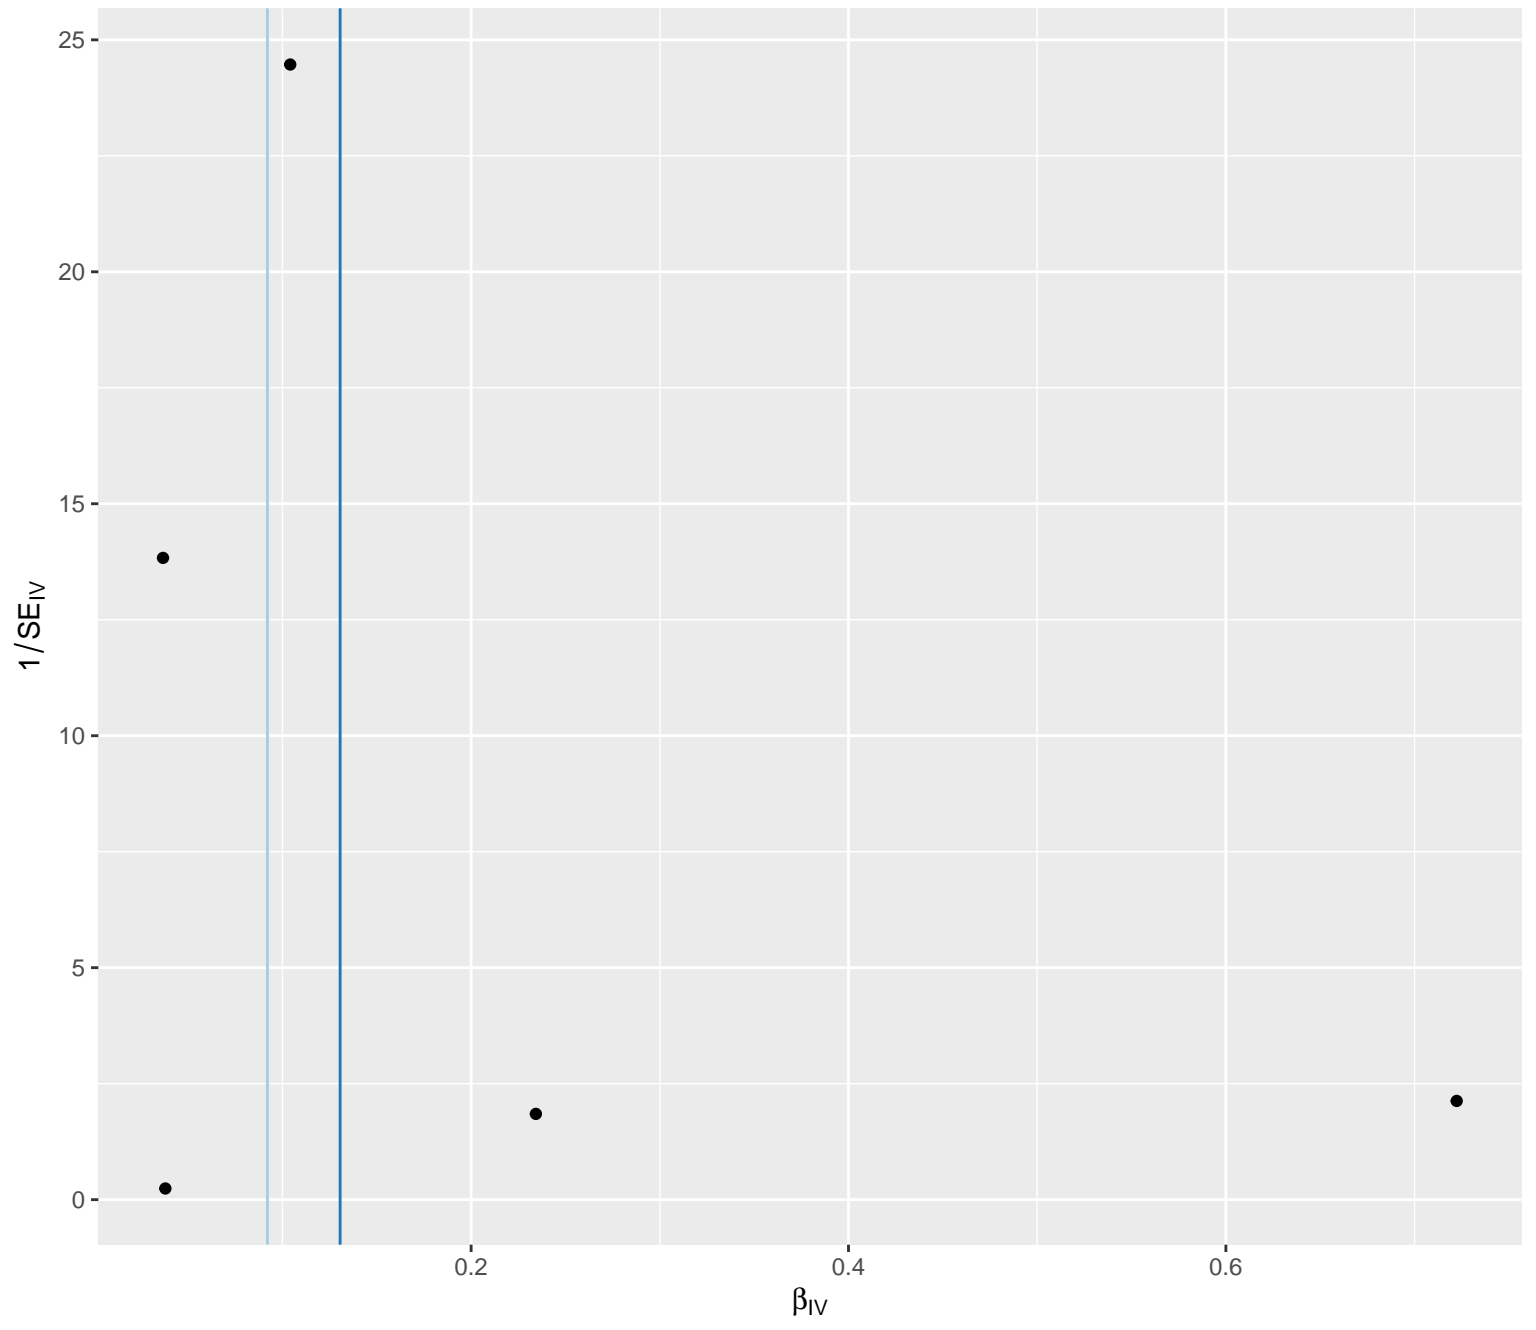

Supplement: DataSheet_3.pdf [file DataSheet_3.pdf]
